# Supplementary material
Source: publisher figshare collection journal article supplement (https://acs.figshare.com/ndownloader/files/3754042)
Supplement: Supplementary file 1 [file 3754042]

data_Compound-2

_publ_contact_author_name         'Prof. Isabel Goncalves'
_publ_contact_author_address
;
  CICECO - Aveiro Institute of Materials
  Department of Chemistry
  University of Aveiro
  3810-193
  Aveiro
  Portugal
;
_publ_contact_author_email        'igoncalves@ua.pt'
_publ_contact_author_fax          '+351 234 370084'
_publ_contact_author_phone        '+351 234 370200'

_journal_name_full                'Inorganic Chemistry'

loop_
_publ_author_name
_publ_author_address
_publ_author_footnote

 'Amarante, Tatiana R.' 
; 
  CICECO - Aveiro Institute of Materials
  Department of Chemistry
  University of Aveiro
  3810-193
  Aveiro
  Portugal
;
.

 'Antunes, Margarida M.' 
; 
  CICECO - Aveiro Institute of Materials
  Department of Chemistry
  University of Aveiro
  3810-193
  Aveiro
  Portugal
;
.

 'Valente, Anabela A.' 
; 
  CICECO - Aveiro Institute of Materials
  Department of Chemistry
  University of Aveiro
  3810-193
  Aveiro
  Portugal
;
.

 'Almeida Paz, Filipe A.' 
; 
  CICECO - Aveiro Institute of Materials
  Department of Chemistry
  University of Aveiro
  3810-193
  Aveiro
  Portugal
;
.

 'Pillinger, Martyn' 
; 
  CICECO - Aveiro Institute of Materials
  Department of Chemistry
  University of Aveiro
  3810-193
  Aveiro
  Portugal
;
.

 'Goncalves, Isabel S.' 
; 
  CICECO - Aveiro Institute of Materials
  Department of Chemistry
  University of Aveiro
  3810-193
  Aveiro
  Portugal
;
.
 
#=============================================================================
_audit_creation_method            'Manual editing plus PLATON'
_audit_creation_date              '16 March 2015'
#============================================================================= 

#=============================================================================
# GENERAL AND CHEMICAL DATA
#=============================================================================

_chemical_name_systematic         ?
_chemical_name_common             ?
_chemical_melting_point           ?
_chemical_formula_moiety          
 'C10 H8 N2 O5 W' 
_chemical_formula_sum
 'C10 H8 N2 O5 W' 
_chemical_formula_weight          420.03

loop_
 _atom_type_symbol
 _atom_type_description
 _atom_type_scat_dispersion_real
 _atom_type_scat_dispersion_imag
 _atom_type_scat_source
 'C'  'C'   0.0033   0.0016
 'International Tables Vol C Tables 4.2.6.8 and 6.1.1.4'
 'H'  'H'   0.0000   0.0000
 'International Tables Vol C Tables 4.2.6.8 and 6.1.1.4'
 'N'  'N'   0.0061   0.0033
 'International Tables Vol C Tables 4.2.6.8 and 6.1.1.4'
 'O'  'O'   0.0106   0.0060
 'International Tables Vol C Tables 4.2.6.8 and 6.1.1.4'
 'W'  'W'  -0.8490   6.8722
 'International Tables Vol C Tables 4.2.6.8 and 6.1.1.4'
 
 
#=============================================================================
# CRYSTAL DATA
#=============================================================================

_space_group_crystal_system       Monoclinic
_space_group_IT_number            14
_space_group_name_H-M_alt         'P 21/n'
_space_group_name_Hall            '-P 2yn'
 
_shelx_space_group_comment
;
The symmetry employed for this shelxl refinement is uniquely defined
by the following loop, which should always be used as a source of
symmetry information in preference to the above space-group names.
They are only intended as comments.
;
 
loop_
 _space_group_symop_operation_xyz
 'x, y, z'
 '-x+1/2, y+1/2, -z+1/2'
 '-x, -y, -z'
 'x-1/2, -y-1/2, z-1/2'
 
_cell_length_a                    6.2509(6)
_cell_length_b                    12.5514(11)
_cell_length_c                    13.6903(12)
_cell_angle_alpha                 90
_cell_angle_beta                  91.851(3)
_cell_angle_gamma                 90
_cell_volume                      1073.55(17)
_cell_formula_units_Z             4
_cell_measurement_temperature     150(2)
_cell_measurement_reflns_used     9568
_cell_measurement_theta_min       2.98
_cell_measurement_theta_max       29.06
 
_exptl_crystal_description        Needle
_exptl_crystal_colour             Colourless
_exptl_crystal_density_meas       ?
_exptl_crystal_density_method     ?
_exptl_crystal_density_diffrn     2.599          
_exptl_crystal_F_000              784
_exptl_transmission_factor_min    0.1683
_exptl_transmission_factor_max    0.2638
_exptl_crystal_size_max           0.220
_exptl_crystal_size_mid           0.060
_exptl_crystal_size_min           0.040
_exptl_absorpt_coefficient_mu     10.776
_shelx_estimated_absorpt_T_min    0.200
_shelx_estimated_absorpt_T_max    0.672
_exptl_absorpt_correction_type    Multi-scan 
_exptl_absorpt_correction_T_min   ?
_exptl_absorpt_correction_T_max   ?
_exptl_absorpt_process_details    
; 
 SADABS V2012/1 (Bruker AXS Inc.) 
; 
 
#=============================================================================
# EXPERIMENTAL DATA
#============================================================================= 

_exptl_special_details
;
 ?
;
_diffrn_ambient_temperature       150(2)
_diffrn_radiation_wavelength      0.71073 
_diffrn_radiation_type            MoK\a 
_diffrn_radiation_source          'Sealed tube' 
_diffrn_radiation_monochromator   'Multi-layer X-ray mirror' 
_diffrn_measurement_device_type   'Bruker D8 QUEST '
_diffrn_measurement_method        '\w / \f scans'
_diffrn_detector_area_resol_mean  10.4167 
_diffrn_standards_number          0 
_diffrn_standards_interval_count  . 
_diffrn_standards_interval_time   . 
_diffrn_standards_decay_%         ?
_diffrn_reflns_number             14503
_diffrn_reflns_av_unetI/netI      0.0422
_diffrn_reflns_av_R_equivalents   0.0694
_diffrn_reflns_limit_h_min        -7
_diffrn_reflns_limit_h_max        7
_diffrn_reflns_limit_k_min        -15
_diffrn_reflns_limit_k_max        15
_diffrn_reflns_limit_l_min        -16
_diffrn_reflns_limit_l_max        16
_diffrn_reflns_theta_min          3.541
_diffrn_reflns_theta_max          25.336
_diffrn_reflns_theta_full         25.242
_diffrn_measured_fraction_theta_max   0.998
_diffrn_measured_fraction_theta_full  0.998
_diffrn_reflns_Laue_measured_fraction_max    0.998
_diffrn_reflns_Laue_measured_fraction_full   0.998
_diffrn_reflns_point_group_measured_fraction_max   0.998
_diffrn_reflns_point_group_measured_fraction_full  0.998
_reflns_number_total              1967
_reflns_number_gt                 1627
_reflns_threshold_expression      'I > 2\s(I)'
_reflns_Friedel_coverage          0.000
_reflns_Friedel_fraction_max      .
_reflns_Friedel_fraction_full     .
 
_reflns_special_details
;
 Reflections were merged by SHELXL according to the crystal
 class for the calculation of statistics and refinement.
 
 _reflns_Friedel_fraction is defined as the number of unique
 Friedel pairs measured divided by the number that would be
 possible theoretically, ignoring centric projections and
 systematic absences.
;
 
_computing_data_collection        'APEX2 2012.4 (Bruker AXS Inc., 2012)'
_computing_cell_refinement        'SAINT V8.27B (Bruker AXS Inc., 2012)'
_computing_data_reduction         'SAINT V8.27B (Bruker AXS Inc., 2012)'
_computing_structure_solution     'SHELXS (Sheldrick, 2014)' 
_computing_structure_refinement   'SHELXL-2014/6 (Sheldrick, 2014)'
_computing_molecular_graphics     'DIAMOND (Brandenburg, 2009)'  
_computing_publication_material   'SHELXTL (Sheldrick, 2014)'


#=============================================================================
# REFINEMENT DATA
#=============================================================================

_refine_special_details           ?
_refine_ls_structure_factor_coef  Fsqd
_refine_ls_matrix_type            full
_refine_ls_weighting_scheme       calc
_refine_ls_weighting_details
'w=1/[\s^2^(Fo^2^)+(0.0054P)^2^+10.1229P] where P=(Fo^2^+2Fc^2^)/3'
_atom_sites_solution_primary      ?
_atom_sites_solution_secondary    ?
_atom_sites_solution_hydrogens    geom
_refine_ls_hydrogen_treatment     constr
_refine_ls_extinction_method      none
_refine_ls_extinction_coef        .
_refine_ls_number_reflns          1967
_refine_ls_number_parameters      163
_refine_ls_number_restraints      183
_refine_ls_R_factor_all           0.0460
_refine_ls_R_factor_gt            0.0316
_refine_ls_wR_factor_ref          0.0623
_refine_ls_wR_factor_gt           0.0585
_refine_ls_goodness_of_fit_ref    1.079
_refine_ls_restrained_S_all       1.036
_refine_ls_shift/su_max           0.000
_refine_ls_shift/su_mean          0.000


#=============================================================================
# ATOMIC COORDINATES AND DISPLACEMENT PARAMETERS
#=============================================================================
 
loop_
 _atom_site_label
 _atom_site_type_symbol
 _atom_site_fract_x
 _atom_site_fract_y
 _atom_site_fract_z
 _atom_site_U_iso_or_equiv
 _atom_site_adp_type
 _atom_site_occupancy
 _atom_site_site_symmetry_order  
 _atom_site_calc_flag
 _atom_site_refinement_flags_posn
 _atom_site_refinement_flags_adp
 _atom_site_refinement_flags_occupancy
 _atom_site_disorder_assembly
 _atom_site_disorder_group
W1 W 0.68111(5) 0.07437(2) 0.21706(2) 0.01800(11) Uani 1 1 d . U . . .
O1 O 0.5617(8) -0.0223(4) 0.3141(4) 0.0261(12) Uani 1 1 d . U . . .
O2 O 0.7153(8) -0.0738(4) 0.2474(4) 0.0258(12) Uani 1 1 d . U . . .
O3 O 0.9362(8) 0.0704(5) 0.1442(4) 0.0307(13) Uani 1 1 d . U . . .
O4 O 0.8739(8) 0.1817(4) 0.1657(4) 0.0305(13) Uani 1 1 d . U . . .
O5 O 0.4701(8) 0.0788(4) 0.1326(4) 0.0280(12) Uani 1 1 d . U . . .
N1 N 0.5450(9) 0.2030(5) 0.3023(5) 0.0177(13) Uani 1 1 d . U . . .
N2 N 0.9028(9) 0.1066(5) 0.3509(5) 0.0199(13) Uani 1 1 d . U . . .
C1 C 0.3575(11) 0.2483(6) 0.2740(6) 0.0222(17) Uani 1 1 d . U . . .
H1 H 0.2841 0.2226 0.2169 0.027 Uiso 1 1 calc R U . . .
C2 C 0.2698(13) 0.3304(6) 0.3252(6) 0.0271(18) Uani 1 1 d . U . . .
H2 H 0.1379 0.3612 0.3033 0.033 Uiso 1 1 calc R U . . .
C3 C 0.3734(12) 0.3679(6) 0.4082(6) 0.0284(18) Uani 1 1 d . U . . .
H3 H 0.3153 0.4253 0.4440 0.034 Uiso 1 1 calc R U . . .
C4 C 0.5643(12) 0.3206(6) 0.4389(6) 0.0243(17) Uani 1 1 d . U . . .
H4 H 0.6371 0.3446 0.4968 0.029 Uiso 1 1 calc R U . . .
C5 C 0.6480(11) 0.2389(6) 0.3854(6) 0.0183(15) Uani 1 1 d . U . . .
C6 C 0.8491(11) 0.1832(5) 0.4133(6) 0.0162(14) Uani 1 1 d . U . . .
C7 C 0.9720(12) 0.2054(6) 0.4961(6) 0.0250(17) Uani 1 1 d . U . . .
H7 H 0.9304 0.2600 0.5396 0.030 Uiso 1 1 calc R U . . .
C8 C 1.1579(12) 0.1468(6) 0.5155(7) 0.0270(18) Uani 1 1 d . U . . .
H8 H 1.2443 0.1599 0.5726 0.032 Uiso 1 1 calc R U . . .
C9 C 1.2129(12) 0.0694(7) 0.4495(6) 0.0268(17) Uani 1 1 d . U . . .
H9 H 1.3403 0.0293 0.4603 0.032 Uiso 1 1 calc R U . . .
C10 C 1.0864(12) 0.0503(6) 0.3694(6) 0.0245(17) Uani 1 1 d . U . . .
H10 H 1.1263 -0.0037 0.3249 0.029 Uiso 1 1 calc R U . . .
 
loop_
 _atom_site_aniso_label
 _atom_site_aniso_U_11
 _atom_site_aniso_U_22
 _atom_site_aniso_U_33
 _atom_site_aniso_U_23
 _atom_site_aniso_U_13
 _atom_site_aniso_U_12
W1 0.01638(16) 0.01653(15) 0.02101(18) 0.00018(16) -0.00059(11) 0.00045(15)
O1 0.025(3) 0.023(3) 0.030(3) -0.002(2) 0.002(2) 0.000(2)
O2 0.026(3) 0.019(2) 0.032(3) 0.000(2) 0.005(2) -0.001(2)
O3 0.026(3) 0.026(3) 0.040(3) -0.001(3) 0.003(2) 0.002(2)
O4 0.028(3) 0.027(3) 0.036(4) 0.002(2) 0.007(3) 0.001(2)
O5 0.032(3) 0.027(3) 0.025(3) 0.003(2) 0.001(2) -0.002(2)
N1 0.014(3) 0.017(3) 0.022(3) 0.005(2) 0.004(2) -0.001(2)
N2 0.015(3) 0.018(3) 0.027(3) 0.001(2) 0.000(2) 0.002(2)
C1 0.015(3) 0.021(4) 0.030(4) 0.008(3) 0.002(3) 0.001(3)
C2 0.023(4) 0.022(4) 0.037(4) 0.010(3) 0.007(3) 0.007(3)
C3 0.027(4) 0.020(4) 0.039(5) 0.004(3) 0.012(3) 0.005(3)
C4 0.024(4) 0.016(3) 0.032(4) 0.000(3) 0.007(3) 0.000(3)
C5 0.017(3) 0.014(3) 0.024(4) 0.005(3) 0.006(3) -0.005(2)
C6 0.013(3) 0.014(3) 0.021(3) 0.004(3) 0.004(2) -0.004(2)
C7 0.025(3) 0.023(4) 0.027(4) 0.001(3) 0.000(3) -0.005(3)
C8 0.021(4) 0.026(4) 0.033(4) 0.008(3) -0.005(3) -0.008(3)
C9 0.018(3) 0.029(4) 0.033(4) 0.007(3) -0.004(3) -0.006(3)
C10 0.017(3) 0.018(4) 0.038(4) 0.007(3) -0.003(3) -0.002(3)
 
_geom_special_details
;
 All esds (except the esd in the dihedral angle between two l.s. planes)
 are estimated using the full covariance matrix.  The cell esds are taken
 into account individually in the estimation of esds in distances, angles
 and torsion angles; correlations between esds in cell parameters are only
 used when they are defined by crystal symmetry.  An approximate (isotropic)
 treatment of cell esds is used for estimating esds involving l.s. planes.
;

#=============================================================================
# GEOMETRY
#============================================================================= 
 
loop_
 _geom_bond_atom_site_label_1
 _geom_bond_atom_site_label_2
 _geom_bond_distance
 _geom_bond_site_symmetry_2
 _geom_bond_publ_flag
W1 O5 1.726(5) . ?
W1 O3 1.909(5) . ?
W1 O2 1.916(5) . ?
W1 O4 1.953(5) . ?
W1 O1 1.964(5) . ?
W1 N1 2.180(6) . ?
W1 N2 2.297(6) . ?
O1 O2 1.493(7) . ?
O3 O4 1.483(7) . ?
N1 C1 1.348(9) . ?
N1 C5 1.366(10) . ?
N2 C6 1.336(9) . ?
N2 C10 1.364(9) . ?
C1 C2 1.371(11) . ?
C1 H1 0.9500 . ?
C2 C3 1.374(12) . ?
C2 H2 0.9500 . ?
C3 C4 1.386(11) . ?
C3 H3 0.9500 . ?
C4 C5 1.373(10) . ?
C4 H4 0.9500 . ?
C5 C6 1.478(10) . ?
C6 C7 1.378(11) . ?
C7 C8 1.393(11) . ?
C7 H7 0.9500 . ?
C8 C9 1.378(12) . ?
C8 H8 0.9500 . ?
C9 C10 1.353(11) . ?
C9 H9 0.9500 . ?
C10 H10 0.9500 . ?
 
loop_
 _geom_angle_atom_site_label_1
 _geom_angle_atom_site_label_2
 _geom_angle_atom_site_label_3
 _geom_angle
 _geom_angle_site_symmetry_1
 _geom_angle_site_symmetry_3
 _geom_angle_publ_flag
O5 W1 O3 106.5(2) . . ?
O5 W1 O2 104.7(2) . . ?
O3 W1 O2 89.9(2) . . ?
O5 W1 O4 101.8(2) . . ?
O3 W1 O4 45.1(2) . . ?
O2 W1 O4 133.0(2) . . ?
O5 W1 O1 100.0(2) . . ?
O3 W1 O1 132.8(2) . . ?
O2 W1 O1 45.3(2) . . ?
O4 W1 O1 157.2(2) . . ?
O5 W1 N1 91.8(2) . . ?
O3 W1 N1 130.2(2) . . ?
O2 W1 N1 130.2(2) . . ?
O4 W1 N1 86.4(2) . . ?
O1 W1 N1 86.1(2) . . ?
O5 W1 N2 163.1(2) . . ?
O3 W1 N2 85.9(2) . . ?
O2 W1 N2 86.4(2) . . ?
O4 W1 N2 78.6(2) . . ?
O1 W1 N2 78.6(2) . . ?
N1 W1 N2 71.3(2) . . ?
O2 O1 W1 65.7(3) . . ?
O1 O2 W1 69.1(3) . . ?
O4 O3 W1 69.0(3) . . ?
O3 O4 W1 65.9(3) . . ?
C1 N1 C5 118.8(7) . . ?
C1 N1 W1 120.6(5) . . ?
C5 N1 W1 120.6(5) . . ?
C6 N2 C10 118.8(7) . . ?
C6 N2 W1 118.6(5) . . ?
C10 N2 W1 122.6(5) . . ?
N1 C1 C2 121.9(8) . . ?
N1 C1 H1 119.0 . . ?
C2 C1 H1 119.0 . . ?
C1 C2 C3 119.7(8) . . ?
C1 C2 H2 120.2 . . ?
C3 C2 H2 120.2 . . ?
C2 C3 C4 118.8(8) . . ?
C2 C3 H3 120.6 . . ?
C4 C3 H3 120.6 . . ?
C5 C4 C3 119.9(8) . . ?
C5 C4 H4 120.1 . . ?
C3 C4 H4 120.1 . . ?
N1 C5 C4 120.9(7) . . ?
N1 C5 C6 115.6(6) . . ?
C4 C5 C6 123.5(7) . . ?
N2 C6 C7 121.8(7) . . ?
N2 C6 C5 113.9(7) . . ?
C7 C6 C5 124.3(7) . . ?
C6 C7 C8 119.3(8) . . ?
C6 C7 H7 120.4 . . ?
C8 C7 H7 120.4 . . ?
C9 C8 C7 118.1(8) . . ?
C9 C8 H8 120.9 . . ?
C7 C8 H8 120.9 . . ?
C10 C9 C8 120.3(8) . . ?
C10 C9 H9 119.8 . . ?
C8 C9 H9 119.8 . . ?
C9 C10 N2 121.6(8) . . ?
C9 C10 H10 119.2 . . ?
N2 C10 H10 119.2 . . ?
 
loop_
 _geom_torsion_atom_site_label_1
 _geom_torsion_atom_site_label_2
 _geom_torsion_atom_site_label_3
 _geom_torsion_atom_site_label_4
 _geom_torsion
 _geom_torsion_site_symmetry_1
 _geom_torsion_site_symmetry_2
 _geom_torsion_site_symmetry_3
 _geom_torsion_site_symmetry_4
 _geom_torsion_publ_flag
C5 N1 C1 C2 1.2(10) . . . . ?
W1 N1 C1 C2 -178.9(5) . . . . ?
N1 C1 C2 C3 -0.4(11) . . . . ?
C1 C2 C3 C4 -0.7(12) . . . . ?
C2 C3 C4 C5 1.1(11) . . . . ?
C1 N1 C5 C4 -0.8(10) . . . . ?
W1 N1 C5 C4 179.3(5) . . . . ?
C1 N1 C5 C6 178.2(6) . . . . ?
W1 N1 C5 C6 -1.6(8) . . . . ?
C3 C4 C5 N1 -0.3(11) . . . . ?
C3 C4 C5 C6 -179.3(7) . . . . ?
C10 N2 C6 C7 -1.1(10) . . . . ?
W1 N2 C6 C7 178.6(5) . . . . ?
C10 N2 C6 C5 179.7(6) . . . . ?
W1 N2 C6 C5 -0.6(8) . . . . ?
N1 C5 C6 N2 1.4(9) . . . . ?
C4 C5 C6 N2 -179.6(7) . . . . ?
N1 C5 C6 C7 -177.8(7) . . . . ?
C4 C5 C6 C7 1.2(11) . . . . ?
N2 C6 C7 C8 0.2(11) . . . . ?
C5 C6 C7 C8 179.4(7) . . . . ?
C6 C7 C8 C9 0.9(11) . . . . ?
C7 C8 C9 C10 -1.2(12) . . . . ?
C8 C9 C10 N2 0.4(12) . . . . ?
C6 N2 C10 C9 0.8(11) . . . . ?
W1 N2 C10 C9 -178.9(6) . . . . ?
 
loop_
 _geom_hbond_atom_site_label_D 
 _geom_hbond_atom_site_label_H 
 _geom_hbond_atom_site_label_A 
 _geom_hbond_distance_DH 
 _geom_hbond_distance_HA 
 _geom_hbond_distance_DA 
 _geom_hbond_angle_DHA 
 _geom_hbond_site_symmetry_A 
C1 H1 O5  0.95 2.45 2.976(10) 114.4 .
C2 H2 O1  0.95 2.48 3.330(10) 149.0 2
C2 H2 O2  0.95 2.43 3.381(9) 175.0 2
C4 H4 O3  0.95 2.64 3.249(10) 122.7 4_566
C7 H7 O5  0.95 2.40 3.291(10) 156.3 4_666
C9 H9 O1  0.95 2.55 3.127(10) 119.0 1_655
 
_refine_diff_density_max    1.941
_refine_diff_density_min   -1.097
_refine_diff_density_rms    0.193
_shelxl_version_number 2014/6

#=============================================================================
#   SHELXL Ins File
#=============================================================================

_shelx_res_file
;
TITL FPD8_14_068 in P2(1)/n
CELL 0.71073   6.25090  12.55140  13.69030  90.0000  91.8506  90.0000
ZERR    4.00   0.00060   0.00110   0.00120   0.0000   0.0029   0.0000
LATT 1

SYMM 0.5-X, 0.5+Y, 0.5-Z

SFAC C  H  N  O  W
UNIT 40 32 8 20 4

LIST 4 ! automatically inserted. Change 6 to 4 for CHECKCIF!!

L.S. 24
BOND $H
CONF
WPDB
ACTA

FMAP 2
PLAN -5

EQIV $1 -x+1/2, y+1/2, -z+1/2
EQIV $2 x-1/2, -y+1/2, z+1/2
EQIV $3 x+1/2, -y+1/2, z+1/2
EQIV $4 x+1, y, z

HTAB C1 O5
HTAB C2 O1_$1
HTAB C2 O2_$1
HTAB C4 O3_$2
HTAB C7 O5_$3
HTAB C9 O1_$4
HTAB

TEMP -123.160
SIZE 0.22 0.06 0.04
SHEL 5.8 0.83

RIGU
WGHT    0.005400   10.122901
FVAR       0.09656
W1    5    0.681110    0.074367    0.217056    11.00000    0.01638    0.01653 =
         0.02101    0.00018   -0.00059    0.00045
O1    4    0.561652   -0.022311    0.314052    11.00000    0.02499    0.02296 =
         0.03035   -0.00167    0.00194   -0.00044
O2    4    0.715297   -0.073786    0.247353    11.00000    0.02614    0.01935 =
         0.03224   -0.00025    0.00456   -0.00064
O3    4    0.936236    0.070375    0.144190    11.00000    0.02637    0.02562 =
         0.04030   -0.00094    0.00313    0.00178
O4    4    0.873872    0.181678    0.165737    11.00000    0.02834    0.02697 =
         0.03646    0.00174    0.00679    0.00141
O5    4    0.470138    0.078797    0.132613    11.00000    0.03198    0.02722 =
         0.02469    0.00255    0.00059   -0.00230
N1    3    0.545020    0.202992    0.302254    11.00000    0.01370    0.01715 =
         0.02235    0.00521    0.00372   -0.00092
N2    3    0.902819    0.106583    0.350885    11.00000    0.01466    0.01776 =
         0.02711    0.00129    0.00017    0.00162
C1    1    0.357524    0.248289    0.273971    11.00000    0.01491    0.02142 =
         0.03041    0.00753    0.00214    0.00127
AFIX  43
H1    2    0.284085    0.222552    0.216894    11.00000   -1.20000
AFIX   0
C2    1    0.269751    0.330389    0.325154    11.00000    0.02340    0.02152 =
         0.03686    0.01019    0.00689    0.00691
AFIX  43
H2    2    0.137869    0.361175    0.303300    11.00000   -1.20000
AFIX   0
C3    1    0.373422    0.367946    0.408220    11.00000    0.02705    0.02017 =
         0.03860    0.00375    0.01203    0.00461
AFIX  43
H3    2    0.315291    0.425345    0.443999    11.00000   -1.20000
AFIX   0
C4    1    0.564307    0.320603    0.438880    11.00000    0.02444    0.01644 =
         0.03235    0.00038    0.00660   -0.00002
AFIX  43
H4    2    0.637085    0.344617    0.496764    11.00000   -1.20000
AFIX   0
C5    1    0.648012    0.238927    0.385429    11.00000    0.01729    0.01357 =
         0.02435    0.00477    0.00618   -0.00456
C6    1    0.849076    0.183166    0.413261    11.00000    0.01347    0.01442 =
         0.02100    0.00387    0.00359   -0.00422
C7    1    0.971983    0.205374    0.496138    11.00000    0.02478    0.02331 =
         0.02698    0.00077    0.00001   -0.00523
AFIX  43
H7    2    0.930396    0.260038    0.539609    11.00000   -1.20000
AFIX   0
C8    1    1.157875    0.146808    0.515499    11.00000    0.02083    0.02649 =
         0.03335    0.00775   -0.00530   -0.00847
AFIX  43
H8    2    1.244286    0.159878    0.572600    11.00000   -1.20000
AFIX   0
C9    1    1.212870    0.069419    0.449523    11.00000    0.01763    0.02899 =
         0.03339    0.00736   -0.00413   -0.00556
AFIX  43
H9    2    1.340275    0.029273    0.460349    11.00000   -1.20000
AFIX   0
C10   1    1.086353    0.050287    0.369374    11.00000    0.01733    0.01834 =
         0.03756    0.00727   -0.00288   -0.00175
AFIX  43
H10   2    1.126343   -0.003693    0.324874    11.00000   -1.20000
AFIX   0
HKLF 4

REM  FPD8_14_068 in P2(1)/n
REM R1 =  0.0316 for    1627 Fo > 4sig(Fo)  and  0.0460 for all    1967 data
REM    163 parameters refined using    183 restraints

END

WGHT      0.0054     10.1226

REM Instructions for potential hydrogen bonds
HTAB C1 O5
HTAB C2 O1_$1
HTAB C2 O2_$1
HTAB C4 O3_$2
HTAB C7 O5_$3
HTAB C9 O1_$4

REM Highest difference peak  1.941,  deepest hole -1.097,  1-sigma level  0.193
Q1    1   0.8224  0.0810  0.2170  11.00000  0.05    1.94
Q2    1   0.6197  0.0752  0.2862  11.00000  0.05    1.16
Q3    1   0.7426  0.0758  0.1366  11.00000  0.05    1.04
Q4    1   0.9706  0.0722  0.2166  11.00000  0.05    1.01
Q5    1   0.6754  0.0757  0.3445  11.00000  0.05    0.96
;
_shelx_res_checksum    2156

_shelx_hkl_file
;
   1   0   0    0.08    0.70
   1   0   0    1.40    0.65
  -1   0   0    2.62    0.69
  -1   0   0   -0.50    0.59
  -1   0   0    0.14    0.72
   2   0   0  158.16    9.41
  -2   0   0  158.60    7.10
  -2   0   0  151.47    8.86
   2   0   0  155.65    7.26
   2   0   0  132.46    8.82
  -2   0   0  157.64    9.38
  -3   0   0    0.22    1.75
   3   0   0    0.50    1.05
   3   0   0    1.04    1.08
  -3   0   0    2.35    2.00
  -3   0   0   -0.91    1.47
   4   0   0   28.97    4.35
  -4   0   0   19.29    3.97
  -4   0   0   30.80    2.59
   4   0   0   33.14    2.54
   4   0   0   30.35    2.27
  -4   0   0   24.27    3.03
  -5   0   0   -0.40    3.68
   5   0   0    2.05    3.08
   5   0   0    1.72    1.83
  -5   0   0   -1.03    1.84
  -6   0   0  107.79    5.94
   6   0   0   99.55    8.75
  -6   0   0   88.73   11.36
  -7   0   0    8.95    2.78
  -8   0   0   71.84    6.09
   8   0   0   68.03    8.82
   1  -1   0   38.39    2.04
  -1  -1   0   40.44    3.15
   1  -1   0   37.68    2.39
  -1  -1   0   36.44    2.54
   1  -1   0   36.50    2.13
   1  -1   0   37.80    2.67
  -1   1   0   36.32    2.40
  -1   1   0   39.98    2.65
   1   1   0   36.71    2.54
  -1   1   0   35.77    2.09
  -1   1   0   36.80    2.07
   2  -1   0   15.15    1.70
  -2  -1   0   13.46    1.96
   2  -1   0   12.39    1.42
  -2  -1   0   14.12    1.47
  -2   1   0   16.65    2.17
   2   1   0   19.48    2.57
  -2   1   0   16.33    1.75
  -2   1   0   12.13    1.67
   2   1   0   13.19    1.78
  -2   1   0   15.88    1.63
   3  -1   0  230.40   13.63
  -3  -1   0  211.02   10.18
  -3  -1   0  224.55   13.72
   3  -1   0  221.94   12.64
   3  -1   0  223.70   10.44
  -3  -1   0  226.30   12.88
   3   1   0  221.05   13.64
  -3   1   0  219.60   10.24
   3   1   0  222.71   10.43
  -3   1   0  215.47   12.74
  -3   1   0  212.92   13.38
  -3   1   0  210.50   10.54
   3   1   0  199.55   12.63
  -4  -1   0   65.24    4.74
  -4  -1   0   60.55    3.61
   4  -1   0   58.80    5.59
  -4  -1   0   48.96    5.71
   4  -1   0   56.92    3.96
   4  -1   0   60.50    3.51
  -4   1   0   56.54    3.49
   4   1   0   59.99    3.58
  -4   1   0   57.64    5.26
   4   1   0   59.26    4.00
   4   1   0   59.39    5.03
  -5  -1   0  162.01   12.96
   5  -1   0  177.04   11.95
  -5  -1   0  193.53   11.12
  -5  -1   0  182.85    8.72
  -5   1   0  176.36    8.64
  -5   1   0  158.01   12.15
   5   1   0  180.03    9.22
   6  -1   0   16.26    4.17
  -6  -1   0   15.70    2.64
  -6   1   0   19.21    2.62
  -6   1   0   16.18    5.12
  -7  -1   0    4.57    2.80
   7  -1   0    3.93    4.70
  -7   1   0    3.56    2.64
   7   1   0    4.76    4.17
   8  -1   0    5.81    4.42
  -8  -1   0    0.54    3.47
  -8   1   0    5.97    3.37
   8   1   0   -4.71    5.20
   0  -2   0  191.55   13.29
   0  -2   0  179.46    8.32
   0  -2   0  181.87    8.02
   0  -2   0  184.13   10.07
   0  -2   0  178.21   10.30
   0   2   0  172.84   10.06
   0   2   0  173.15    8.02
   0   2   0  176.99   13.31
   0   2   0  174.56    8.32
   1  -2   0  429.27   24.17
   1  -2   0  428.07   19.91
   1  -2   0  422.69   19.33
   1  -2   0  446.03   25.38
  -1  -2   0  435.75   24.28
  -1   2   0  419.95   19.33
   1   2   0  432.95   24.27
   1   2   0  430.74   24.74
  -1   2   0  449.34   25.37
  -1   2   0  418.46   19.90
  -2  -2   0   61.81    4.29
   2  -2   0   63.74    3.44
   2  -2   0   67.09    4.45
   2  -2   0   65.66    4.04
   2  -2   0   64.01    3.29
  -2  -2   0   71.43    4.77
  -2  -2   0   62.23    3.23
  -2   2   0   68.29    3.53
   2   2   0   58.18    4.13
  -2   2   0   66.14    4.35
  -2   2   0   63.49    3.43
   3  -2   0    0.40    0.95
  -3  -2   0    0.32    1.64
  -3  -2   0    7.70    2.72
  -3  -2   0    0.27    1.34
   3  -2   0    0.38    1.15
  -3   2   0    1.40    1.40
   3   2   0    3.38    1.53
  -3   2   0    0.82    1.44
  -3   2   0    1.34    1.49
   4  -2   0    1.28    1.17
  -4  -2   0    0.46    1.44
   4  -2   0    0.76    1.32
  -4  -2   0   -5.70    2.66
  -4  -2   0   -0.31    1.72
   4  -2   0    1.91    2.26
  -4   2   0    1.86    1.43
   4   2   0    1.20    1.50
   4   2   0   -2.24    1.20
  -4   2   0    1.05    1.96
  -4   2   0   -1.21    1.48
   5  -2   0   61.09    6.76
  -5  -2   0   60.64    5.05
  -5  -2   0   61.58    4.03
  -5  -2   0   44.84    8.30
   5   2   0   56.89    4.64
  -5   2   0   64.99    4.13
  -5   2   0   61.24    6.32
  -6  -2   0   22.59    3.41
   6  -2   0   17.45    4.35
  -6   2   0   26.43    4.96
   6   2   0   24.80    4.08
  -6   2   0   20.60    3.35
  -7  -2   0   54.39    4.93
   7  -2   0   49.65    8.51
   7   2   0   62.38    7.14
  -7   2   0   55.15    4.74
   8  -2   0   37.60    6.35
  -8  -2   0   38.12    5.50
   8   2   0   41.48    8.29
  -8   2   0   41.84    5.02
   0  -3   0    0.78    0.56
   0  -3   0   -0.22    0.45
   0   3   0    0.10    0.51
   0   3   0   -0.50    0.73
   0   3   0   -1.58    2.46
   0   3   0   -0.17    0.57
   1  -3   0   76.98    4.89
   1  -3   0   72.27    3.76
   1  -3   0   75.63    3.58
  -1  -3   0   75.21    4.56
   1  -3   0   73.14    6.20
   1   3   0   77.15    4.49
  -1   3   0   77.38    4.82
  -1   3   0   73.32    3.81
   1   3   0   69.52    4.49
  -1   3   0   74.00    3.61
   2  -3   0  195.67   11.04
   2  -3   0  195.50    9.19
   2  -3   0  197.19   11.71
   2  -3   0  198.98    8.91
  -2  -3   0  184.03   11.23
  -2   3   0  190.33    8.92
  -2   3   0  194.74   11.66
   2   3   0  197.48   11.38
  -2   3   0  192.32    9.29
   2   3   0  184.18   11.17
  -3  -3   0   36.06    2.69
  -3  -3   0   38.53    3.72
   3  -3   0   37.61    2.44
   3  -3   0   40.85    4.06
  -3  -3   0   40.73    4.81
   3  -3   0   37.98    2.86
  -3   3   0   37.64    3.42
  -3   3   0   35.11    3.09
  -3   3   0   35.65    2.79
   3   3   0   37.80    2.99
  -4  -3   0  372.39   17.19
   4  -3   0  386.89   17.70
   4  -3   0  383.04   22.92
  -4  -3   0  369.25   23.00
   4  -3   0  382.11   21.51
  -4  -3   0  372.37   21.70
  -4   3   0  369.80   22.63
   4   3   0  352.06   21.55
   4   3   0  379.04   17.72
  -4   3   0  383.76   17.79
  -4   3   0  384.87   17.30
   5  -3   0    5.62    3.48
  -5  -3   0    7.81    2.01
   5  -3   0    6.17    2.77
  -5  -3   0    7.69    2.61
  -5  -3   0    2.48    4.75
   5   3   0   -0.26    2.62
   5   3   0    8.44    2.91
  -5   3   0    4.38    3.14
  -5   3   0    9.77    2.10
  -6  -3   0   23.62    4.12
   6  -3   0   25.96    4.82
  -6  -3   0   24.32    3.47
   6   3   0   31.52    5.38
  -6   3   0   20.60    3.38
   7  -3   0   -0.80    4.95
  -7  -3   0    0.49    2.84
  -7   3   0    2.00    2.23
   7   3   0    0.89    4.26
  -8  -3   0    6.75    3.74
   8   3   0    9.31    6.09
  -8   3   0    6.40    3.15
   0  -4   0   80.32    4.51
   0  -4   0   72.94    3.46
   0  -4   0   70.53    4.35
   0  -4   0   91.33    6.80
   0   4   0   72.80    3.48
   0   4   0   62.81    4.35
   0   4   0   76.29    3.85
   1  -4   0  190.85   11.02
   1  -4   0  156.80   10.24
   1  -4   0  181.31    8.56
  -1  -4   0  175.04   10.43
  -1  -4   0  173.70   10.36
   1  -4   0  181.84    8.23
   1  -4   0  185.90   13.59
  -1   4   0  188.90   10.95
  -1   4   0  178.99    8.25
   1   4   0  173.60   10.37
  -1   4   0  188.45    8.68
   1   4   0  177.81   10.55
   1   4   0  179.30   14.21
  -1   4   0  198.43   13.97
   2  -4   0   33.89    2.45
   2  -4   0   34.13    2.18
   2  -4   0   33.53    2.31
   2  -4   0   37.09    3.47
  -2  -4   0   28.65    2.96
   2  -4   0   34.95    4.01
  -2   4   0   37.52    3.09
  -2   4   0   34.97    2.94
   2   4   0   32.85    2.76
  -2   4   0   30.43    2.41
   2   4   0   34.17    3.00
   3  -4   0   24.84    3.66
   3  -4   0   17.83    2.22
  -3  -4   0   19.57    3.54
  -3  -4   0   17.66    3.09
   3  -4   0   19.86    1.82
  -3  -4   0   19.66    2.04
  -3   4   0   21.58    2.52
   3   4   0   20.95    2.17
  -3   4   0   21.22    2.70
  -3   4   0   18.47    2.22
   3   4   0   19.35    2.75
  -4  -4   0   -0.15    1.53
   4  -4   0   -0.51    1.66
   4  -4   0    2.48    2.51
   4  -4   0    3.48    1.08
  -4  -4   0   -0.73    2.67
  -4  -4   0    1.86    1.79
   4   4   0    3.41    2.22
  -4   4   0    3.34    2.25
  -4   4   0    0.19    1.58
   4   4   0   -1.26    1.50
  -4   4   0   -0.29    1.81
  -5  -4   0   49.04    8.85
   5  -4   0   71.06    5.87
   5  -4   0   75.48    7.58
  -5  -4   0   76.36    5.74
  -5  -4   0   75.18    4.60
  -5   4   0   71.42    7.13
   5   4   0   67.91    6.07
  -5   4   0   82.41    4.63
   5   4   0   59.79    5.16
  -5   4   0   73.98    4.79
  -6  -4   0    9.86    2.45
  -6  -4   0   13.50    2.73
   6  -4   0    9.53    4.63
  -6   4   0    8.95    2.12
   6   4   0    9.20    3.73
  -7  -4   0   83.28    6.10
   7  -4   0   73.78    9.86
   7   4   0   81.83    8.63
  -7   4   0   81.28    5.50
  -8  -4   0    3.42    3.71
   8   4   0    4.84    6.29
  -8   4   0    5.96    3.15
   0  -5   0    0.62    0.67
   0  -5   0    0.11    0.57
   0  -5   0   -3.15    3.33
   0   5   0    0.24    3.23
   0   5   0    1.51    1.24
   0   5   0   -0.01    0.74
  -1  -5   0   34.81    2.36
   1  -5   0   34.38    2.08
  -1  -5   0   33.88    2.64
   1  -5   0   35.12    3.55
   1  -5   0   33.79    2.39
   1  -5   0   32.37    4.48
   1  -5   0   35.30    2.26
  -1   5   0   30.85    5.97
  -1   5   0   32.20    2.65
  -1   5   0   36.91    2.13
   1   5   0   33.07    2.83
   1   5   0   38.12    2.67
   1   5   0   32.27    5.38
   2  -5   0  116.07    6.76
   2  -5   0  124.06    7.85
   2  -5   0  121.24    5.59
   2  -5   0  118.08    5.84
   2  -5   0  102.77    9.36
  -2  -5   0  118.27    7.25
  -2   5   0  117.79    7.42
   2   5   0  116.92    7.07
  -2   5   0  112.54    6.09
  -2   5   0  120.37    5.76
   2   5   0  110.92    7.05
  -3  -5   0  147.40    9.68
   3  -5   0  161.52    9.41
   3  -5   0  164.78   12.50
  -3  -5   0  160.87    7.58
   3  -5   0  160.82    7.84
   3  -5   0  168.65   10.41
  -3   5   0  160.60    7.73
  -3   5   0  163.45    8.04
   3   5   0  152.86    9.58
   3   5   0  165.80    9.79
  -3   5   0  160.62   10.05
  -4  -5   0  131.36   10.85
  -4  -5   0  157.98    7.76
   4  -5   0  168.27    9.69
   4  -5   0  164.33   10.80
  -4  -5   0  157.04    9.96
  -4   5   0  174.29    7.99
   4   5   0  159.81   10.14
  -4   5   0  161.72   10.48
  -4   5   0  169.36    8.37
  -5  -5   0   79.33    6.22
  -5  -5   0   80.15    4.69
   5  -5   0   76.93    6.28
   5  -5   0   75.70    8.16
   5   5   0   73.37    5.51
   5   5   0   87.43    6.58
  -5   5   0   82.93    4.81
  -5   5   0   85.53    5.31
  -5   5   0   82.15    7.22
  -6  -5   0    8.20    2.73
  -6  -5   0    9.22    2.64
   6  -5   0    1.82    4.71
   6   5   0    6.54    3.69
  -6   5   0   11.41    2.49
   7  -5   0   -4.21    5.70
  -7  -5   0    0.10    2.83
   7   5   0    5.29    4.73
  -7   5   0    2.28    2.61
  -8  -5   0    0.88    3.78
  -8   5   0    0.65    2.86
   8   5   0    7.21    7.46
   0  -6   0  534.03   28.34
   0  -6   0  448.66   27.63
   0  -6   0  510.11   36.34
   0  -6   0  508.52   29.30
   0  -6   0  480.12   22.02
   0   6   0  443.81   27.64
   0   6   0  482.65   22.87
   0   6   0  534.32   36.23
   1  -6   0   30.57    2.15
   1  -6   0   25.34    3.22
   1  -6   0   19.31    4.39
   1  -6   0   27.46    1.92
  -1  -6   0   31.17    1.67
  -1  -6   0   31.97    2.65
   1  -6   0   22.91    2.58
  -1  -6   0   25.25    2.11
   1  -6   0   31.35    1.95
  -1   6   0   32.59    2.06
  -1   6   0   27.46    4.88
   1   6   0   28.02    2.52
   1   6   0   22.24    5.14
  -1   6   0   27.03    2.87
   2  -6   0  134.87    6.64
   2  -6   0  137.74    8.85
   2  -6   0  131.23   10.73
   2  -6   0  138.33    6.43
   2  -6   0  131.61    7.82
  -2  -6   0  133.34    8.24
   2   6   0  141.38    8.30
   2   6   0  144.41   12.62
  -2   6   0  129.90    6.88
  -2   6   0  138.98    8.56
  -2   6   0  134.74    6.56
   2   6   0  134.58    8.21
   3  -6   0    2.29    2.00
  -3  -6   0    4.06    1.72
   3  -6   0    5.52    2.15
  -3  -6   0    5.57    1.19
   3  -6   0    5.04    1.04
   3  -6   0    4.04    1.29
  -3   6   0    3.59    1.66
  -3   6   0    2.38    1.50
   3   6   0    3.01    1.57
   3   6   0    2.89    1.79
  -3   6   0    2.18    1.55
  -4  -6   0    3.90    2.30
  -4  -6   0    3.80    2.98
   4  -6   0    4.43    2.82
  -4  -6   0    2.61    1.52
   4  -6   0    3.17    2.03
   4   6   0    5.46    2.40
  -4   6   0    4.18    2.84
  -4   6   0    3.94    1.82
  -4   6   0    0.20    1.91
   5  -6   0    9.45    2.99
   5  -6   0    9.89    4.28
  -5  -6   0   11.19    2.17
  -5  -6   0   13.01    2.76
  -5   6   0   12.20    2.43
   5   6   0   11.35    3.29
  -5   6   0   10.61    2.40
  -6  -6   0   83.91    6.59
  -6  -6   0   82.92    5.31
   6  -6   0   72.03    9.64
  -6   6   0   80.19    5.14
   6   6   0   78.85    7.84
  -6   6   0   76.73    5.59
  -7  -6   0   30.16    4.80
   7  -6   0   10.12    6.42
  -7   6   0   23.59    3.60
   7   6   0   15.28    5.33
  -8  -6   0   38.23    5.90
   8   6   0   39.18    8.08
   0  -7   0   -1.29    0.75
   0  -7   0   -2.99    1.58
   0  -7   0   -3.93    3.31
   0  -7   0    0.17    0.94
   0  -7   0   -1.29    1.92
   0   7   0   -0.82    3.73
   0   7   0   -2.32    1.46
   0   7   0    0.13    1.15
   1  -7   0   71.06    4.07
   1  -7   0   71.07    4.72
  -1  -7   0   62.63    4.44
   1  -7   0   66.09    6.47
   1  -7   0   67.13    3.77
   1  -7   0   71.72    3.57
   1  -7   0   71.54    5.37
  -1   7   0   65.03    3.57
  -1   7   0   75.74    7.55
   1   7   0   65.46    8.13
   1   7   0   71.16    4.63
  -1   7   0   70.23    4.19
   1   7   0   67.72    3.97
   2  -7   0    0.60    1.95
   2  -7   0    0.03    1.15
   2  -7   0    2.16    0.91
   2  -7   0    2.28    0.95
   2  -7   0    2.31    2.12
  -2  -7   0    2.48    1.61
   2  -7   0    1.73    1.12
   2   7   0    0.32    4.89
   2   7   0   -0.59    1.76
   2   7   0    1.19    2.04
  -2   7   0    3.19    1.42
  -2   7   0    3.54    1.21
   3  -7   0  288.00   17.68
   3  -7   0  299.26   16.32
  -3  -7   0  295.15   16.75
  -3  -7   0  275.38   13.01
   3   7   0  277.02   16.73
  -3   7   0  289.20   13.28
   3   7   0  262.00   16.89
  -3   7   0  293.75   13.87
  -3   7   0  278.43   17.48
   3   7   0  303.58   23.22
   4  -7   0   12.60    3.39
  -4  -7   0   11.82    1.82
   4  -7   0   14.09    2.43
  -4  -7   0   15.45    2.63
   4   7   0   13.21    2.72
  -4   7   0   12.41    3.17
  -4   7   0   16.25    2.42
  -4   7   0   19.69    3.14
   5  -7   0  127.03    8.59
  -5  -7   0  121.42    6.55
  -5  -7   0  116.23    8.49
   5  -7   0  127.15   10.57
  -5   7   0  127.97    6.81
  -5   7   0  122.87    7.15
   5   7   0  121.20    8.96
   6  -7   0   -0.82    5.37
  -6  -7   0    2.44    2.85
  -6  -7   0   -0.77    2.51
  -6   7   0   -4.21    2.82
   6   7   0   -4.85    4.33
  -6   7   0    3.38    2.63
  -7  -7   0    3.90    3.34
   7  -7   0   -2.67    6.57
  -7   7   0    3.45    2.70
   7   7   0    6.56    5.97
   0  -8   0  407.72   24.54
   0  -8   0  426.52   18.27
   0  -8   0  418.56   23.64
   0  -8   0  385.25   30.24
   0  -8   0  399.22   22.93
   0   8   0  400.64   30.46
   0   8   0  411.77   19.09
   0   8   0  402.11   22.99
  -1  -8   0   85.91    5.67
   1  -8   0   82.03    5.24
   1  -8   0   95.16    8.29
   1  -8   0   91.83    4.59
   1  -8   0  103.39    6.10
   1  -8   0   93.63    6.62
   1  -8   0   86.37    4.66
   1   8   0   79.61    5.82
   1   8   0   86.24    4.97
   1   8   0   98.03    9.00
  -1   8   0  106.67    9.63
  -1   8   0   86.64    4.49
  -1   8   0   94.22    5.14
   2  -8   0   65.70    5.61
   2  -8   0   63.34    6.29
   2  -8   0   68.29    3.93
   2  -8   0   67.12    4.05
   2  -8   0   62.87    3.62
   2  -8   0   69.89    5.28
   2  -8   0   66.56    4.00
  -2  -8   0   65.30    4.76
   2   8   0   72.70    8.29
  -2   8   0   68.36    4.16
   2   8   0   61.76    5.02
  -2   8   0   65.00    3.79
  -3  -8   0    1.69    2.19
   3  -8   0    1.05    2.56
  -3  -8   0    1.84    1.29
   3  -8   0   -1.45    1.34
  -3   8   0   -0.81    2.13
   3   8   0    1.86    6.37
   3   8   0   -3.22    2.78
   3   8   0   -0.64    2.94
  -3   8   0    2.04    2.69
  -3   8   0    0.54    1.68
   4  -8   0    0.04    2.09
  -4  -8   0    0.79    1.51
  -4  -8   0    2.05    2.61
   4  -8   0   -3.21    3.59
  -4   8   0   -0.08    2.18
  -4   8   0   -0.44    2.08
   4   8   0    0.24    2.83
   4   8   0    0.32    8.56
  -5  -8   0   10.66    2.20
   5  -8   0   12.75    3.75
   5  -8   0    4.51    4.39
  -5  -8   0   10.53    3.39
  -5   8   0    4.96    2.74
  -5   8   0    9.51    2.58
   5   8   0    8.64    3.43
   6  -8   0   29.17    6.70
  -6  -8   0   41.58    5.18
  -6  -8   0   40.88    4.39
  -6   8   0   36.14    4.51
   6   8   0   25.35    5.26
  -6   8   0   34.06    4.39
   7  -8   0   15.22    7.60
  -7  -8   0   20.60    3.71
  -7   8   0   26.23    4.13
   0  -9   0    0.99    2.66
   0  -9   0    6.05    3.60
   0  -9   0    2.03    1.08
   0  -9   0    0.02    1.17
   0  -9   0    0.14    1.97
   0   9   0    1.28    1.90
   0   9   0   -0.47    1.96
   0   9   0   -0.04    3.67
   1  -9   0    3.18    2.38
   1  -9   0    3.06    0.90
   1  -9   0    2.19    1.51
   1  -9   0   -0.85    1.96
  -1  -9   0    2.43    1.51
  -1   9   0    3.52    1.99
  -1   9   0   -5.10    4.56
   1   9   0    2.98    1.87
   1   9   0   -0.53    1.99
   1   9   0   -0.89    4.47
  -1   9   0    1.02    1.36
  -2  -9   0   81.46    5.74
   2  -9   0   82.90    6.72
   2  -9   0   85.70    6.39
  -2   9   0   82.15    5.05
   2   9   0   84.20    5.22
  -2   9   0   81.67    4.53
   2   9   0   78.28    6.51
   2   9   0   91.37    9.64
   3  -9   0   35.45    2.82
   3  -9   0   35.37    3.18
   3  -9   0   34.74    5.14
   3  -9   0   30.00    5.09
  -3  -9   0   32.52    2.44
  -3  -9   0   31.17    4.10
  -3   9   0   38.07    3.36
  -3   9   0   35.56    3.68
   3   9   0   22.57    4.71
   3   9   0   36.47    8.85
  -4  -9   0   95.83    5.20
   4  -9   0  109.89    6.62
   4  -9   0  102.94    8.52
  -4  -9   0  102.60    7.42
  -4   9   0   92.45    6.18
   4   9   0   82.01    7.68
   4   9   0  104.66   13.36
  -4   9   0  103.48    5.77
   5  -9   0   17.42    5.16
  -5  -9   0   22.01    4.62
  -5  -9   0   23.08    3.32
   5   9   0   13.34    4.31
  -5   9   0   30.05    4.38
   5   9   0   11.91    9.39
  -5   9   0   34.13    3.95
  -6  -9   0   16.57    3.01
  -6  -9   0   17.29    3.75
   6  -9   0   13.18    6.85
  -6   9   0   25.65    3.63
  -6   9   0   19.35    3.20
   7  -9   0   -1.97    8.31
  -7   9   0   -7.33    3.66
  -7   9   0    5.14    3.93
   0 -10   0   -3.44    3.40
   0 -10   0    2.75    1.46
   0 -10   0    0.21    2.68
   0  10   0   -1.77    2.44
   0  10   0    4.00    2.26
   0  10   0    4.61    5.11
   1 -10   0  166.82   11.21
  -1 -10   0  188.86   10.73
   1 -10   0  178.72   11.91
  -1  10   0  190.12    9.31
   1  10   0  183.91    9.17
   1  10   0  177.99   15.23
  -1  10   0  166.31    8.49
  -1  10   0  188.01   15.96
  -2 -10   0    8.14    2.12
   2 -10   0    3.65    2.97
   2 -10   0    7.37    3.07
  -2  10   0    6.92    2.53
  -2  10   0    6.72    1.77
   2  10   0    9.90    3.10
   2  10   0    3.57    2.38
   2  10   0   -5.45    6.04
  -3 -10   0   10.13    2.77
   3 -10   0   10.33    3.46
  -3  10   0    9.46    2.33
   3  10   0   13.58    7.26
  -3  10   0    8.89    2.83
  -4 -10   0   -0.82    2.90
   4 -10   0    3.72    2.54
   4 -10   0   -1.29    3.67
  -4 -10   0    0.57    1.63
   4  10   0    6.42    7.91
  -4  10   0    2.03    2.46
  -4  10   0   -4.37    2.78
   4  10   0   -0.44    4.01
  -5 -10   0   35.30    3.71
  -5 -10   0   38.58    5.24
   5 -10   0   34.65    6.04
  -5  10   0   37.88    4.42
   5  10   0   37.80    9.41
  -5  10   0   41.83    4.94
   6 -10   0    3.28    6.62
  -6 -10   0    3.38    4.11
  -6  10   0    2.70    3.05
  -6  10   0    2.24    3.98
   6  10   0  -11.53    8.19
   0 -11   0    1.35    3.93
   0 -11   0    0.11    1.65
   0 -11   0    0.60    2.93
   0  11   0    3.45    5.90
   0  11   0    1.85    3.02
   0  11   0    0.69    2.23
   1 -11   0    3.70    3.32
  -1 -11   0    4.94    2.06
   1 -11   0    3.45    3.01
  -1 -11   0    4.15    2.87
   1  11   0    5.04    2.88
   1  11   0   -0.41    5.61
   1  11   0    3.56    2.91
  -1  11   0    4.52    5.25
  -1  11   0    2.34    2.64
  -2 -11   0   97.53    6.61
   2 -11   0   82.59    7.87
   2 -11   0   90.50    7.80
   2  11   0   91.31   10.60
  -2  11   0  100.39    5.81
   2  11   0   97.25    6.08
  -2  11   0   89.18    5.18
   2  11   0   78.40    7.88
   3 -11   0   16.39    4.02
  -3 -11   0   17.82    3.08
   3  11   0   15.46    3.10
  -3  11   0   16.13    2.65
   3  11   0   24.45    6.92
  -3  11   0   23.13    3.82
  -4 -11   0   91.75    7.60
   4 -11   0   85.87    8.82
  -4  11   0   95.38    6.20
   4  11   0   98.57   13.69
  -4  11   0   99.95    6.25
   5 -11   0   12.12    5.88
  -5 -11   0   13.23    3.65
  -5  11   0   15.59    3.47
  -5  11   0   15.83    3.48
   5  11   0   14.20    9.49
   6 -11   0    6.94    7.62
   6  11   0   20.81    9.10
  -6  11   0   11.06    4.12
  -6  11   0    8.00    3.32
   0 -12   0  134.53    9.57
   0 -12   0  110.70    9.23
   0 -12   0  129.35    7.91
   0  12   0  146.66   13.90
   0  12   0  140.55    7.64
  -1 -12   0   35.19    5.63
   1 -12   0   23.78    4.82
   1 -12   0   28.45    5.54
  -1 -12   0   35.86    3.82
   1  12   0   39.16    4.85
  -1  12   0   31.78    4.08
   1  12   0   41.20    9.05
  -1  12   0   28.60    7.25
   1  12   0   24.71    5.12
   2 -12   0   52.07    7.27
  -2 -12   0   52.69    4.93
   2 -12   0   46.88    6.48
  -2  12   0   62.32    5.32
  -2  12   0   45.67    3.93
   2  12   0   57.10    5.34
   2  12   0   57.66    9.80
   2  12   0   42.19    7.17
  -3 -12   0   -1.80    2.84
   3 -12   0    1.42    3.98
  -3  12   0    2.87    2.61
   3  12   0   -0.55    3.19
   3  12   0    1.06    7.95
  -3  12   0    1.90    2.85
  -4 -12   0    2.18    3.58
   4 -12   0    2.06    4.49
  -4  12   0    1.80    3.22
   4  12   0    0.73    3.94
  -4  12   0    1.58    2.92
   4  12   0   17.85    8.97
  -5 -12   0   11.63    4.38
   5 -12   0    4.12    6.30
  -5  12   0   11.51    3.21
  -5  12   0   10.71    3.66
   5  12   0   18.29   10.55
   6 -12   0   25.80    9.83
   6  12   0   39.32   11.58
  -6  12   0   28.64    5.58
   0 -13   0    0.60    3.67
   0  13   0    7.29    5.92
   0  13   0    1.61    3.16
   1 -13   0   34.38    5.42
  -1 -13   0   30.87    6.07
  -1 -13   0   33.80    3.97
   1  13   0   38.24    9.65
   1  13   0   33.55    5.27
  -1  13   0   39.28    5.12
  -1  13   0   36.30    9.34
  -2 -13   0   10.20    2.97
  -2 -13   0    7.77    4.22
   2 -13   0    8.46    4.24
   2  13   0    7.79    3.84
   2  13   0   16.47    7.65
  -2  13   0    8.44    3.62
  -2  13   0    6.79    2.56
  -3 -13   0  112.18    8.30
   3 -13   0   94.01    9.60
   3  13   0  102.68    7.46
   3  13   0   96.29   12.48
  -3  13   0   93.49    6.50
  -3  13   0  108.88    7.48
  -4 -13   0    9.40    4.06
   4 -13   0    0.40    5.09
  -4  13   0    4.30    3.70
  -4  13   0    5.71    3.90
   4  13   0    3.18    4.70
   4  13   0   10.50    8.76
   5 -13   0   22.52    7.76
  -5  13   0   41.16    5.56
  -5  13   0   40.09    5.98
   0 -14   0  103.00    9.19
   0  14   0  100.64   12.95
   0  14   0  102.84    7.35
  -1 -14   0    6.99    4.18
   1 -14   0    2.39    4.34
   1  14   0   10.21    6.78
  -1  14   0    8.44    3.90
   1  14   0    2.32    3.67
  -1  14   0   15.24    6.50
  -2 -14   0   44.30    6.26
  -2 -14   0   39.11    5.28
   2 -14   0   37.74    7.52
  -2  14   0   42.18    5.44
   2  14   0   39.80    5.69
   2  14   0   59.61    9.62
   3 -14   0    2.30    5.13
  -3 -14   0    4.77    4.68
  -3 -14   0    1.24    3.92
   3  14   0   18.34    9.20
   3  14   0    4.60    4.55
  -3  14   0    2.00    3.57
  -3  14   0   -2.12    4.14
  -4 -14   0    2.49    4.28
   4 -14   0    0.07    5.78
  -4  14   0   -1.81    4.08
   4  14   0   12.68   10.97
  -4  14   0   -0.41    3.91
   0 -15   0   -8.98    4.33
   0  15   0    3.82    8.66
   0  15   0   -1.27    4.11
   1 -15   0   -1.06    5.01
  -1 -15   0    4.78    4.05
  -1  15   0   17.62    7.33
   1  15   0    6.03    4.19
   1  15   0    7.78    8.58
  -1  15   0    9.29    3.84
   2 -15   0   23.97    6.08
  -2 -15   0   32.92    7.02
  -2  15   0   27.81    4.45
   2  15   0   26.65    8.59
   2  15   0   23.98    5.17
   3 -15   0   24.11    6.56
  -3 -15   0   36.33    7.18
  -3  15   0   33.35    5.52
   3  15   0   57.37   12.90
  -4 -15   0   55.28    9.74
   4  15   0   49.53   13.72
  -4  15   0   45.75    6.94
   0 -16   0   23.19    5.00
   0  16   0   23.78    5.35
   0  16   0   50.71   12.23
   1 -16   0   28.15    5.98
  -1 -16   0   39.76    6.96
  -1  16   0   36.83    5.73
   1  16   0   42.32    7.07
  -1  16   0   65.32   12.25
   2 -16   0    9.47    6.60
  -2 -16   0    8.61    5.54
   2  16   0   11.59   10.31
   2  16   0    1.44    5.79
  -2  16   0    2.40    5.44
   3 -16   0    2.68    6.91
  -3  16   0    1.41    5.83
   0  17   0    0.36    5.84
  -1  17   0   -3.51    6.17
   1  17   0    0.76    5.76
   8   0  -1   10.12    5.44
  -8   0   1    4.46    3.55
  -7   0   1  114.41    6.80
  -6   0   1    1.17    2.30
  -6   0   1    4.80    2.64
   6   0  -1    5.36    3.71
  -5   0   1   13.16    2.66
  -5   0   1    2.44    3.67
   5   0  -1    8.65    2.33
  -5   0   1   11.24    2.14
   5   0  -1    9.90    3.13
  -4   0   1   -0.03    1.81
  -4   0   1   -0.28    1.46
   4   0  -1    0.48    1.24
   4   0  -1    2.82    2.33
   4   0  -1   -1.92    1.20
  -3   0   1   37.84    3.84
   3   0  -1   23.92    2.46
   3   0  -1   27.86    2.25
  -3   0   1   27.21    2.52
  -3   0   1   27.31    3.00
   2   0  -1    0.44    0.95
  -2   0   1   -0.89    0.99
  -2   0   1    0.16    0.82
  -2   0   1    1.73    1.62
   2   0  -1    1.12    0.78
  -1   0   1  887.42   42.91
  -1   0   1  963.25   54.82
   1   0  -1 1000.00   52.39
  -1   0   1  950.75   52.38
   1   0  -1  940.99   54.81
   1   0  -1  874.84   42.90
   1   0   1  658.37   30.32
   1   0   1  679.95   38.93
  -1   0  -1  644.83   30.31
   1   0   1  710.40   39.70
  -1   0  -1  701.39   39.70
  -2   0  -1   -0.99    0.87
   2   0   1   -0.90    0.80
   2   0   1    2.66    1.20
   2   0   1    0.07    0.86
  -2   0  -1    0.60    1.13
   2   0   1   -0.10    0.85
   3   0   1    7.44    1.43
  -3   0  -1    6.89    1.98
  -3   0  -1    6.21    1.52
   3   0   1    5.03    1.40
  -4   0  -1    0.12    1.30
  -4   0  -1   -1.03    2.16
   4   0   1    0.00    0.93
   4   0   1   -0.98    1.22
   4   0   1    2.47    2.27
  -5   0  -1  139.26    6.90
  -5   0  -1  131.16    9.85
   5   0   1  124.26    9.23
   6   0   1    1.13    3.04
  -6   0  -1    4.79    2.24
  -6   0  -1    1.02    4.95
   7   0   1  119.62    9.34
  -7   0  -1  115.08    6.95
   8   0   1    4.30    4.92
  -8   0  -1    2.26    3.43
  -8  -1   1    2.48    3.51
  -8   1   1    1.24    2.89
   8   1  -1    2.14    5.58
  -7  -1   1   -1.13    2.75
   7  -1  -1   -0.87    4.98
  -7   1   1    1.76    2.27
  -6  -1   1   70.74    4.88
   6  -1  -1   69.38    7.64
  -6  -1   1   71.96    6.05
  -6   1   1   75.60    4.62
   5  -1  -1   68.38    4.78
  -5  -1   1   68.40    5.69
  -5  -1   1   71.28    4.32
  -5  -1   1   63.43    8.82
   5  -1  -1   66.25    6.71
  -5   1   1   70.53    7.70
   5   1  -1   68.47    5.06
   5   1  -1   69.29    6.44
  -5   1   1   67.36    5.29
  -5   1   1   65.24    4.15
  -4  -1   1  288.98   16.14
   4  -1  -1  268.34   17.07
   4  -1  -1  290.97   13.10
  -4  -1   1  255.05   17.09
   4  -1  -1  279.82   15.91
  -4  -1   1  274.53   12.78
   4   1  -1  282.11   13.10
  -4   1   1  279.90   12.82
   4   1  -1  269.08   15.90
  -4   1   1  284.64   16.06
  -4   1   1  269.25   16.98
  -4   1   1  263.98   13.10
   4   1  -1  268.27   17.07
  -3  -1   1   24.92    3.08
  -3  -1   1   28.23    2.46
  -3  -1   1   34.20    4.39
   3  -1  -1   26.51    2.58
   3  -1  -1   28.83    2.23
  -3   1   1   26.23    3.42
  -3   1   1   26.10    3.09
  -3   1   1   26.79    2.35
   3   1  -1   27.51    2.23
   3   1  -1   27.86    2.58
   3   1  -1   38.77    4.47
  -3   1   1   26.62    2.74
   2  -1  -1  261.64   13.71
   2  -1  -1  243.32   11.24
  -2  -1   1  204.60   13.73
  -2  -1   1  255.48   14.60
   2  -1  -1  240.62   14.51
   2   1  -1  246.53   14.54
  -2   1   1  236.97   14.43
  -2   1   1  227.23   10.98
  -2   1   1  246.18   13.70
   2   1  -1  235.20   11.19
  -2   1   1  238.87   11.26
   2   1  -1  247.02   13.76
   1  -1  -1    7.89    1.21
  -1  -1   1    7.56    1.44
   1  -1  -1    9.34    1.15
   1  -1  -1   14.82    2.09
   1   1  -1   14.26    2.57
  -1   1   1    8.97    1.18
  -1   1   1   13.54    1.84
   1   1  -1    9.29    1.44
  -1   1   1    7.31    1.26
   1  -1   1   98.31    5.70
  -1  -1  -1   93.13    4.36
   1  -1   1   94.16    4.41
   1  -1   1   96.72    4.59
  -1  -1  -1   91.49    5.69
   1   1   1   92.49    5.55
   1   1   1   85.63    4.34
   1   1   1   94.81    5.70
  -1   1  -1   98.24    4.62
  -1   1  -1   95.37    4.42
  -1   1  -1   99.16    5.67
   2  -1   1  281.55   16.74
   2  -1   1  298.28   13.77
  -2  -1  -1  310.83   13.38
  -2  -1  -1  282.67   16.81
  -2  -1  -1  314.01   17.56
   2  -1   1  311.21   17.52
   2  -1   1  288.52   13.37
   2   1   1  291.51   13.34
  -2   1  -1  285.70   13.39
  -2   1  -1  293.21   17.44
   2   1   1  296.47   17.20
   2   1   1  285.16   16.78
  -3  -1  -1  108.29    5.63
   3  -1   1  112.74    5.70
   3  -1   1  112.11    5.53
  -3  -1  -1  122.26    7.78
  -3  -1  -1  111.45    7.06
   3  -1   1  107.79    6.81
  -3   1  -1  111.15    5.69
   3   1   1  115.83    6.92
  -3   1  -1  102.83    7.30
   3   1   1  125.56    5.87
   4  -1   1  280.46   17.15
   4  -1   1  271.94   16.14
   4  -1   1  289.33   13.33
  -4  -1  -1  286.63   17.35
  -4  -1  -1  279.70   13.01
   4   1   1  272.02   13.31
  -4   1  -1  283.97   17.09
  -4   1  -1  290.33   13.07
   4   1   1  268.43   16.15
   5  -1   1   34.90    4.98
  -5  -1  -1   22.86    4.40
  -5  -1  -1   24.74    3.07
   5   1   1   28.36    3.90
   5   1   1   32.26    4.34
  -5   1  -1   25.60    5.01
  -5   1  -1   28.54    3.03
   6  -1   1   20.32    4.27
  -6  -1  -1   22.59    3.44
  -6  -1  -1   19.17    5.68
   6   1   1   24.89    4.89
  -6   1  -1   14.33    4.98
  -6   1  -1   21.11    3.34
   7  -1   1   -1.85    3.55
  -7  -1  -1    4.22    2.78
  -7   1  -1    4.07    2.60
   7   1   1   -7.73    3.85
  -8  -1  -1   11.51    3.61
   8  -1   1    9.63    4.75
  -8   1  -1   12.04    3.52
   8   1   1    5.27    5.34
  -8  -2   1   45.71    5.67
   8  -2  -1   51.86    9.78
   8   2  -1   48.28    8.59
  -8   2   1   44.56    4.56
   7  -2  -1   18.91    5.56
  -7  -2   1   28.61    4.25
   7   2  -1   39.05    6.41
  -7   2   1   27.20    3.97
  -6  -2   1   60.35    4.40
   6  -2  -1   43.50    7.84
  -6  -2   1   56.16    5.39
  -6   2   1   62.39    4.35
  -5  -2   1   11.92    2.15
  -5  -2   1   12.81    2.42
  -5  -2   1    4.94    4.22
   5  -2  -1   11.28    3.50
  -5   2   1   10.12    2.20
  -5   2   1    6.19    3.12
   5   2  -1    9.83    2.35
   4  -2  -1    2.65    1.48
   4  -2  -1    4.94    1.32
  -4  -2   1    4.82    2.05
  -4  -2   1   -1.99    2.57
   4  -2  -1    3.82    2.51
  -4  -2   1    5.10    1.52
  -4   2   1   -0.80    2.03
   4   2  -1    5.37    1.18
  -4   2   1    4.65    1.84
  -4   2   1    4.80    1.41
   4   2  -1    3.66    1.62
  -4   2   1    3.13    1.67
   3  -2  -1   75.16    5.81
  -3  -2   1   62.47    4.86
  -3  -2   1   76.41    6.10
   3  -2  -1   68.99    4.50
   3  -2  -1   69.23    3.81
  -3   2   1   66.82    3.92
   3   2  -1   70.61    4.76
  -3   2   1   69.33    4.12
  -3   2   1   69.44    4.68
  -3   2   1   65.94    5.06
   3   2  -1   65.85    3.78
  -2  -2   1   41.55    3.37
   2  -2  -1   48.44    2.64
   2  -2  -1   46.67    3.08
  -2  -2   1   54.08    4.23
   2  -2  -1   51.40    3.97
  -2   2   1   47.32    2.90
  -2   2   1   47.58    3.14
  -2   2   1   45.76    2.79
  -2   2   1   49.81    3.51
   2   2  -1   46.23    3.31
   1  -2  -1  307.16   14.19
  -1  -2   1  298.99   17.31
   1  -2  -1  305.63   18.15
   1  -2  -1  318.50   17.17
  -1   2   1  308.11   18.13
  -1   2   1  316.21   13.78
   1   2  -1  278.69   17.28
  -1   2   1  313.53   17.18
  -1   2   1  306.26   14.20
   0  -2  -1  711.75   41.02
   0  -2   1  686.22   31.22
   0  -2   1  757.67   50.28
   0  -2  -1  748.38   50.28
   0  -2   1  642.07   39.15
   0  -2   1  698.07   40.00
   0  -2   1  692.47   32.09
   0  -2  -1  755.07   40.10
   0   2  -1  651.33   39.16
   0   2   1  676.78   40.99
   0   2  -1  668.70   32.09
   0   2   1  756.26   50.23
   0   2   1  605.93   39.10
   0   2  -1  744.17   50.32
   0   2   1  707.90   40.08
  -1  -2  -1  139.38    7.07
   1  -2   1  158.41    7.18
   1  -2   1  160.51    7.41
  -1  -2  -1  159.45    9.19
  -1  -2  -1  135.86    8.98
   1  -2   1  170.72    9.40
   1  -2   1  155.41   11.63
  -1   2  -1  153.33    7.19
   1   2   1  168.76    9.22
  -1   2  -1  158.49    7.43
  -1   2  -1  167.99    9.38
   1   2   1  157.42    9.03
   1   2   1  153.17    7.08
  -2  -2  -1   38.89    2.26
   2  -2   1   38.48    2.30
  -2  -2  -1   35.09    3.04
  -2  -2  -1   44.35    3.30
   2  -2   1   42.05    3.05
   2  -2   1   37.76    2.54
   2  -2   1   38.80    2.78
   2   2   1   36.74    2.86
  -2   2  -1   42.40    2.90
  -2   2  -1   38.87    2.48
  -2   2  -1   41.88    2.80
   2   2   1   45.84    3.05
   3  -2   1    1.99    1.22
  -3  -2  -1   -1.33    1.22
   3  -2   1    0.98    1.16
  -3  -2  -1    2.70    1.67
   3  -2   1    1.82    1.01
  -3  -2  -1    7.04    2.38
  -3   2  -1    1.69    1.45
   3   2   1    1.38    1.83
  -3   2  -1    3.37    1.45
   3   2   1    3.06    1.20
  -3   2  -1    1.55    1.28
  -4  -2  -1   27.13    5.05
  -4  -2  -1   34.93    2.72
   4  -2   1   35.73    2.97
   4  -2   1   38.35    4.58
   4  -2   1   33.31    2.47
  -4  -2  -1   32.27    3.37
   4   2   1   34.73    2.88
   4   2   1   33.04    2.90
  -4   2  -1   35.32    3.79
  -4   2  -1   35.73    2.83
   4   2   1   36.37    3.84
   5  -2   1   29.63    5.67
  -5  -2  -1   32.43    3.06
  -5  -2  -1   18.40    4.75
   5   2   1   29.68    4.07
  -5   2  -1   32.98    3.18
  -5   2  -1   29.06    4.88
   5   2   1   31.78    4.54
  -6  -2  -1   88.27    5.31
   6  -2   1   79.33    8.11
  -6  -2  -1   69.82   11.24
  -6   2  -1   77.25    8.57
   6   2   1   82.67    7.23
  -6   2  -1   88.23    5.08
   7  -2   1   39.57    7.47
  -7  -2  -1   44.50    4.57
   7  -2   1   41.17    5.72
   7   2   1   42.94    6.68
  -7   2  -1   41.34    4.30
  -8  -2  -1   31.67    5.32
   8  -2   1   30.06    5.98
   8   2   1   41.56    8.48
  -8   2  -1   34.62    4.86
   8  -3  -1    0.51    6.88
  -8  -3   1    2.33    3.68
   8   3  -1   -0.42    5.69
  -8   3   1    2.14    3.11
   7  -3  -1    1.24    5.23
  -7  -3   1    6.85    2.98
   7   3  -1    7.37    4.47
  -7   3   1    5.65    2.72
  -6  -3   1    0.52    2.58
   6  -3  -1    0.88    4.63
  -6  -3   1    5.36    2.41
  -6   3   1    6.21    2.39
  -5  -3   1  190.53   11.42
  -5  -3   1  186.97    9.00
   5  -3  -1  192.03   12.92
  -5  -3   1  157.09   14.05
   5  -3  -1  188.59   11.48
   5   3  -1  179.66    9.35
  -5   3   1  183.81    9.36
  -5   3   1  175.30   12.62
  -5   3   1  190.85    9.12
  -4  -3   1    4.67    1.56
   4  -3  -1    3.35    1.74
   4  -3  -1    6.10    1.17
   4  -3  -1    5.89    2.71
  -4  -3   1   -2.95    2.76
  -4  -3   1    5.76    2.25
   4   3  -1    4.27    1.70
  -4   3   1    4.36    1.73
   4   3  -1    5.11    1.38
  -4   3   1    5.58    1.76
  -4   3   1    3.24    2.21
  -3  -3   1  257.25   15.78
  -3  -3   1  267.79   16.79
   3  -3  -1  294.40   15.61
   3  -3  -1  271.94   16.71
   3  -3  -1  287.34   12.89
  -3   3   1  268.74   13.00
  -3   3   1  261.47   16.42
  -3   3   1  265.33   12.59
  -3   3   1  276.78   15.61
   3   3  -1  269.21   15.70
   2  -3  -1   39.97    2.55
  -2  -3   1   35.87    3.21
   2  -3  -1   36.01    2.43
  -2  -3   1   31.98    3.95
   2  -3  -1   37.94    3.46
  -2   3   1   36.21    2.55
   2   3  -1   36.05    3.06
  -2   3   1   36.03    2.45
  -2   3   1   34.91    3.06
  -2   3   1   37.41    2.74
  -1  -3   1   23.65    2.15
   1  -3  -1   29.18    3.16
   1  -3  -1   26.60    2.28
   1  -3  -1   20.85    1.83
   1  -3  -1   29.31    2.62
  -1   3   1   27.73    2.38
   1   3  -1   27.25    2.19
  -1   3   1   24.69    1.95
  -1   3   1   24.52    1.66
   0  -3   1   -0.49    0.67
   0  -3   1    1.24    0.65
   0  -3  -1    0.26    1.21
   0  -3  -1   -3.68    2.68
   0  -3  -1   -1.16    1.09
   0  -3   1   -4.20    2.29
   0  -3  -1    0.09    0.48
   0  -3   1    0.60    0.68
   0   3  -1   -1.46    2.58
   0   3   1   -1.27    2.14
   0   3   1   -0.82    0.97
   0   3   1   -0.54    0.34
   0   3   1   -0.19    0.51
   0   3  -1   -0.65    0.71
   0   3  -1    0.39    0.84
   1  -3   1  189.90    8.53
  -1  -3  -1  168.24    8.39
   1  -3   1  188.23   13.83
  -1  -3  -1  184.62   10.71
  -1  -3  -1  175.64   10.87
   1  -3   1  191.13    8.80
   1  -3   1  192.96   11.22
   1   3   1  185.62   10.70
  -1   3  -1  193.97   14.13
  -1   3  -1  185.14    8.82
  -1   3  -1  190.05    8.54
   1   3   1  191.23   14.32
   1   3   1  197.14   10.97
  -2  -3  -1   45.57    3.40
   2  -3   1   46.53    3.43
  -2  -3  -1   45.79    2.47
   2  -3   1   46.74    2.54
   2  -3   1   45.70    2.67
   2   3   1   45.04    3.20
   2   3   1   40.45    3.24
  -2   3  -1   44.04    2.74
  -2   3  -1   42.29    2.91
  -2   3  -1   44.48    3.27
  -3  -3  -1  287.47   12.70
   3  -3   1  272.37   12.69
   3  -3   1  284.45   15.85
   3  -3   1  272.16   13.07
  -3  -3  -1  281.32   16.86
  -3  -3  -1  269.79   16.05
   3  -3   1  284.54   16.82
  -3   3  -1  272.68   12.79
   3   3   1  270.90   16.34
  -3   3  -1  283.05   16.60
  -3   3  -1  276.56   13.25
   3   3   1  262.39   15.91
  -4  -3  -1    1.67    3.04
   4  -3   1    5.62    1.21
   4  -3   1    1.40    2.49
  -4  -3  -1    8.44    1.94
   4  -3   1    6.13    1.72
  -4  -3  -1    6.06    1.51
   4   3   1    6.32    2.12
  -4   3  -1    7.07    1.87
   4   3   1    5.75    1.31
  -4   3  -1   11.41    1.75
  -4   3  -1    4.66    1.99
   5  -3   1  121.02    8.92
  -5  -3  -1  116.63    6.14
  -5  -3  -1   99.74   10.31
  -5   3  -1  114.03    6.23
   5   3   1  119.17    8.24
   5   3   1  113.97    6.97
  -5   3  -1  114.46    8.51
   6  -3   1   -0.59    3.86
  -6  -3  -1    5.93    2.30
   6   3   1    0.90    3.39
  -6   3  -1    8.90    4.43
  -6   3  -1    0.02    2.22
   7  -3   1    2.22    4.97
  -7  -3  -1    8.28    3.22
  -7   3  -1    4.63    2.55
   7   3   1    5.72    4.47
  -8  -3  -1   -2.49    3.53
   8  -3   1    2.08    3.79
   8   3   1   -2.63    6.00
  -8   3  -1   -5.27    3.05
   8  -4  -1   44.24    8.05
  -8  -4   1   57.37    5.93
  -8   4   1   49.20    5.19
   8   4  -1   50.02    9.64
  -7  -4   1    7.94    3.58
  -7  -4   1    6.76    3.05
   7  -4  -1   -1.60    5.72
  -7   4   1   12.26    2.80
   7   4  -1   11.25    4.67
  -6  -4   1   84.37    6.48
  -6  -4   1   79.81    5.12
   6  -4  -1   67.95    9.05
  -6   4   1   80.04    4.94
   6   4  -1   79.93    7.75
   5  -4  -1    8.93    2.98
   5  -4  -1    4.42    4.06
  -5  -4   1    8.20    2.24
  -5  -4   1    5.11    2.39
  -5   4   1    8.42    2.46
   5   4  -1    5.16    2.82
  -5   4   1    5.08    3.67
  -5   4   1    8.25    1.97
   5   4  -1    4.02    2.40
   4  -4  -1    5.43    1.91
  -4  -4   1    6.08    1.56
  -4  -4   1    7.09    2.56
   4  -4  -1    6.25    1.11
  -4  -4   1    6.93    2.30
   4  -4  -1    5.83    2.97
   4   4  -1    5.73    1.76
   4   4  -1    2.88    1.40
  -4   4   1    7.42    2.19
  -4   4   1    8.51    1.74
  -4   4   1    6.76    1.75
   3  -4  -1   15.09    2.02
  -3  -4   1   19.15    3.71
   3  -4  -1   15.33    1.67
   3  -4  -1   15.11    2.47
  -3  -4   1   14.15    2.60
  -3   4   1   15.00    1.72
  -3   4   1   15.32    2.13
  -3   4   1   14.79    2.46
   3   4  -1   15.96    2.05
  -2  -4   1  147.41    9.47
   2  -4  -1  152.40    7.80
   2  -4  -1  165.80   10.15
   2  -4  -1  177.20    9.21
   2  -4  -1  153.37   12.45
   2   4  -1  160.76    9.48
  -2   4   1  161.84    7.89
  -2   4   1  160.68    9.93
   2   4  -1  156.73    9.45
  -2   4   1  164.06    7.57
  -1  -4   1   66.11    4.48
   1  -4  -1   73.34    3.81
   1  -4  -1   77.15    4.62
   1  -4  -1   73.17    6.40
   1  -4  -1   73.21    5.12
   1   4  -1   74.86    7.68
   1   4  -1   66.87    4.49
  -1   4   1   73.20    4.82
  -1   4   1   73.45    4.03
  -1   4   1   70.46    3.54
  -1   4   1   79.19    6.77
   0  -4  -1  535.38   29.07
   0  -4  -1  520.62   36.75
   0  -4   1  500.81   22.62
   0  -4   1  526.04   36.71
   0  -4  -1  482.61   28.31
   0  -4   1  502.90   23.30
   0  -4  -1  516.31   29.88
   0  -4   1  483.67   28.37
   0   4   1  495.36   22.55
   0   4  -1  488.32   23.31
   0   4   1  543.57   36.68
   0   4   1  487.73   23.35
   0   4   1  511.17   29.05
   0   4  -1  478.83   28.38
   0   4  -1  516.52   36.82
   0   4   1  501.99   28.31
  -1  -4  -1   26.87    2.14
   1  -4   1   23.68    1.58
   1  -4   1   19.40    2.10
  -1  -4  -1   25.25    1.98
   1  -4   1   28.24    3.35
   1  -4   1   24.27    1.76
   1  -4   1   26.57    2.34
   1   4   1   22.94    5.04
  -1   4  -1   23.15    1.64
  -1   4  -1   29.82    4.75
   1   4   1   25.43    2.58
  -1   4  -1   25.57    2.07
   1   4   1   21.02    2.00
  -2  -4  -1   84.78    5.77
   2  -4   1   89.43    6.16
   2  -4   1   91.96    4.49
   2  -4   1   91.63    4.67
  -2  -4  -1   88.27    4.36
   2  -4   1   92.54    7.42
  -2   4  -1   92.96    5.87
   2   4   1  103.18    5.89
   2   4   1   84.36    5.63
  -2   4  -1   90.05    4.62
  -2   4  -1   89.11    4.85
  -3  -4  -1    0.76    1.82
  -3  -4  -1    0.37    1.56
   3  -4   1    1.23    1.89
   3  -4   1    0.33    0.89
  -3  -4  -1   -0.37    1.24
   3  -4   1   -0.85    0.69
   3  -4   1    0.60    1.16
   3   4   1    0.50    1.53
  -3   4  -1    0.13    1.33
  -3   4  -1   -0.04    1.37
  -3   4  -1   -0.02    1.30
   3   4   1   -0.12    1.08
   4  -4   1   43.14    3.65
   4  -4   1   38.88    2.64
  -4  -4  -1   42.74    3.02
  -4  -4  -1   43.98    3.86
   4  -4   1   37.40    4.89
  -4  -4  -1   31.64    5.18
  -4   4  -1   39.17    3.23
  -4   4  -1   42.97    4.28
  -4   4  -1   46.65    3.16
   4   4   1   38.60    3.11
   4   4   1   35.42    4.00
  -5  -4  -1    5.29    5.11
   5  -4   1   14.55    3.71
  -5  -4  -1   18.74    2.77
  -5  -4  -1   18.63    3.02
   5   4   1   16.50    3.52
  -5   4  -1   15.64    3.24
  -5   4  -1   17.03    2.43
   5   4   1    9.75    2.96
  -6  -4  -1   80.93    5.25
   6  -4   1   72.44    8.29
   6   4   1   78.46    7.27
  -6   4  -1   75.92    4.87
  -7  -4  -1    6.23    2.87
   7  -4   1    2.20    5.26
   7   4   1    8.19    4.91
  -7   4  -1    4.93    2.28
   8  -4   1   57.06    7.14
  -8  -4  -1   37.67    4.99
  -8   4  -1   48.88    5.11
   8   4   1   51.65    9.89
  -8  -5   1   -4.72    4.27
   8   5  -1   -0.38    7.49
  -8   5   1    0.56    2.99
   7  -5  -1    1.24    6.12
  -7  -5   1    0.85    3.33
  -7  -5   1    1.36    2.87
   7   5  -1   -5.49    5.26
  -7   5   1    0.28    2.36
   6  -5  -1   22.89    5.56
  -6  -5   1   27.07    3.87
  -6  -5   1   30.50    5.01
  -6   5   1   23.78    3.26
   6   5  -1   37.83    5.99
  -6   5   1   31.79    4.53
   5  -5  -1   63.39    5.53
  -5  -5   1   62.63    5.62
  -5  -5   1   58.64    4.16
   5  -5  -1   58.07    7.76
  -5   5   1   57.93    4.30
   5   5  -1   57.44    4.76
   5   5  -1   61.54    5.85
  -5   5   1   60.81    4.60
   4  -5  -1  186.51   10.83
   4  -5  -1  191.24   12.03
  -4  -5   1  171.61    8.58
  -4  -5   1  156.09   11.81
  -4  -5   1  170.41   11.02
  -4   5   1  187.63    8.81
   4   5  -1  193.93   11.20
  -4   5   1  186.92    9.18
  -4   5   1  178.86   11.79
   3  -5  -1  174.31   11.07
   3  -5  -1  194.22   10.08
  -3  -5   1  162.54   10.33
  -3  -5   1  156.00   10.96
   3  -5  -1  163.16   13.33
   3  -5  -1  171.11    8.35
   3   5  -1  183.34   10.42
  -3   5   1  176.88    8.58
  -3   5   1  173.82    8.24
  -3   5   1  168.80   10.75
   3   5  -1  169.52   10.21
   2  -5  -1   92.48    4.98
   2  -5  -1   92.55    8.17
  -2  -5   1   98.67    6.25
   2  -5  -1   99.94    6.78
   2  -5  -1   99.86    5.69
   2   5  -1   97.61    6.13
  -2   5   1   95.08    4.92
   2   5  -1   99.22    5.93
  -2   5   1   99.26    5.24
  -2   5   1   96.95    6.31
   1  -5  -1    9.86    1.89
  -1  -5   1   10.63    1.89
   1  -5  -1   12.67    1.67
   1  -5  -1    8.98    3.04
   1  -5  -1   11.19    1.90
  -1   5   1   13.09    1.44
  -1   5   1   14.57    3.64
   1   5  -1   10.24    1.89
   1   5  -1   10.95    4.22
   1   5  -1   16.22    1.71
  -1   5   1   13.48    2.20
  -1   5   1   12.45    2.17
   0  -5  -1   35.94    3.44
   0  -5   1   33.41    1.88
   0  -5   1   35.08    2.20
   0  -5  -1   33.34    2.11
   0  -5   1   34.85    4.95
   0  -5  -1   30.27    4.94
   0  -5  -1   35.69    2.74
   0  -5   1   32.35    2.28
   0  -5   1   27.20    2.07
   0   5   1   31.89    1.64
   0   5   1   30.35    4.84
   0   5  -1   30.68    2.27
   0   5   1   31.54    2.57
   0   5   1   29.75    2.61
   0   5   1   30.80    2.12
   0   5  -1   23.25    5.89
   0   5  -1   31.83    2.42
   1  -5   1   70.56    3.49
  -1  -5  -1   65.13    4.35
  -1  -5  -1   68.97    4.42
   1  -5   1   64.39    6.49
   1  -5   1   72.40    3.65
   1  -5   1   67.24    5.05
   1  -5   1   72.81    4.31
   1   5   1   76.00    4.85
  -1   5  -1   73.77    3.59
  -1   5  -1   64.06    7.81
  -1   5  -1   68.34    4.02
   1   5   1   52.79    7.93
   1   5   1   72.59    4.48
   2  -5   1   82.88    4.28
   2  -5   1   86.26    5.94
  -2  -5  -1   78.02    3.98
   2  -5   1   80.06    4.14
  -2  -5  -1   81.43    5.49
   2  -5   1   81.25    7.10
   2   5   1   90.09    5.52
   2   5   1   77.27    5.34
   2   5   1  101.35    9.56
  -2   5  -1   85.32    5.60
  -2   5  -1   80.28    4.32
  -2   5  -1   80.54    4.60
  -3  -5  -1  175.53    8.33
   3  -5   1  189.21   10.47
   3  -5   1  186.75    8.68
  -3  -5  -1  169.97   10.71
   3  -5   1  182.66   11.31
   3  -5   1  187.38    8.40
   3  -5   1  164.42   13.56
  -3   5  -1  185.26    8.54
  -3   5  -1  180.82   11.11
   3   5   1  174.96   10.83
   3   5   1  167.87   10.54
  -3   5  -1  179.56    8.93
   4  -5   1  199.81   12.55
  -4  -5  -1  187.41    9.10
  -4  -5  -1  165.30   12.93
  -4  -5  -1  205.95   11.85
   4  -5   1  188.24   11.41
  -4   5  -1  197.03    9.30
   4   5   1  198.01   11.92
  -4   5  -1  189.97    9.74
  -4   5  -1  192.02   12.22
  -5  -5  -1   63.53    5.32
  -5  -5  -1   63.90    4.27
  -5  -5  -1   44.71    9.16
   5  -5   1   62.56    5.51
   5  -5   1   63.39    7.21
  -5   5  -1   62.14    4.53
   5   5   1   68.06    5.93
  -5   5  -1   59.93    6.44
  -5   5  -1   72.43    4.41
   6  -5   1   -0.62    4.33
  -6  -5  -1    2.36    2.24
   6   5   1    1.33    3.67
  -6   5  -1    3.49    2.42
   7  -5   1   -0.25    5.24
  -7  -5  -1    5.00    3.17
  -7   5  -1    3.44    2.67
   7   5   1    4.81    5.51
  -8  -5  -1    1.72    3.76
   8  -5   1   17.74    4.88
   8   5   1    8.86    7.75
  -8  -6   1    9.26    4.13
   8   6  -1    8.48    7.12
  -7  -6   1   39.15    4.67
  -7  -6   1   49.48    5.48
   7  -6  -1   33.44    7.23
   7   6  -1   43.23    8.32
  -7   6   1   34.56    4.59
   6  -6  -1   12.90    5.48
  -6  -6   1   14.72    3.19
  -6  -6   1   14.41    2.59
   6   6  -1   10.39    4.21
  -6   6   1   14.11    3.17
  -6   6   1   16.30    2.81
  -5  -6   1   16.29    2.32
   5  -6  -1   17.68    3.18
  -5  -6   1   18.21    3.26
   5  -6  -1   19.06    4.30
   5   6  -1   14.19    3.06
   5   6  -1   13.38    3.29
  -5   6   1   16.87    2.56
  -5   6   1   17.84    2.89
  -4  -6   1   -3.05    1.52
   4  -6  -1   -1.76    2.88
   4  -6  -1    0.19    2.17
  -4  -6   1    0.49    2.11
  -4   6   1    0.20    1.85
   4   6  -1    0.82    2.18
  -4   6   1    1.91    1.89
  -4   6   1    2.13    2.59
   3  -6  -1   77.94    5.75
  -3  -6   1   75.06    5.24
   3  -6  -1   70.68    3.88
   3  -6  -1   68.64    4.63
   3  -6  -1   73.12    6.66
  -3   6   1   71.55    4.06
  -3   6   1   69.91    4.55
   3   6  -1   64.80    4.86
  -3   6   1   76.37    5.24
   3   6  -1   75.17    4.96
  -2  -6   1   15.04    2.32
   2  -6  -1   18.88    1.55
   2  -6  -1   19.30    1.65
   2  -6  -1   19.01    3.19
   2  -6  -1   11.82    3.32
   2  -6  -1   20.53    2.31
   2   6  -1   17.41    5.63
   2   6  -1   19.76    2.42
  -2   6   1   18.60    2.25
  -2   6   1   19.10    1.88
  -2   6   1   19.59    2.39
   2   6  -1   15.72    2.16
  -1  -6   1  459.08   26.11
   1  -6  -1  449.89   33.82
   1  -6  -1  487.00   26.72
   1  -6  -1  465.25   27.53
   1  -6  -1  459.88   21.47
  -1   6   1  464.05   20.75
  -1   6   1  469.46   21.58
  -1   6   1  509.84   34.13
   1   6  -1  440.38   26.08
   1   6  -1  451.73   34.29
   1   6  -1  423.57   21.38
   0  -6   1   99.82    5.37
   0  -6   1   68.89    9.01
   0  -6  -1   87.67    6.40
   0  -6   1   79.70    5.40
   0  -6  -1   72.17    8.44
   0  -6  -1   95.50    5.84
   0  -6  -1   92.75    5.22
   0  -6   1   98.98    4.30
   0   6   1   92.59    4.15
   0   6   1   93.34    5.24
   0   6   1   85.53    5.60
   0   6  -1   72.30    9.22
   0   6  -1   92.34    4.76
   0   6  -1   96.11    5.50
   0   6   1   90.77    4.90
   0   6   1   77.32    8.73
   1  -6   1  210.72   12.57
   1  -6   1  225.08   10.51
  -1  -6  -1  195.01   12.66
   1  -6   1  219.74   10.14
  -1  -6  -1  226.94   12.94
   1  -6   1  220.11   13.61
   1  -6   1  218.56   16.79
  -1   6  -1  224.66   10.17
   1   6   1  239.56   13.00
  -1   6  -1  251.17   17.77
   1   6   1  206.48   12.71
  -1   6  -1  220.97   10.65
   1   6   1  221.13   17.43
   2  -6   1    4.38    0.99
  -2  -6  -1    4.48    0.77
  -2  -6  -1    4.89    1.47
   2  -6   1    3.87    2.08
   2  -6   1    8.61    1.09
   2  -6   1    4.18    1.76
   2   6   1    3.20    1.57
   2   6   1    0.42    4.62
  -2   6  -1    4.86    1.27
   2   6   1    2.52    2.07
  -2   6  -1    3.51    1.42
  -3  -6  -1   17.22    1.96
  -3  -6  -1   18.70    2.84
   3  -6   1   23.74    1.90
   3  -6   1   19.97    1.67
   3  -6   1   20.10    2.58
   3  -6   1   23.83    3.65
   3  -6   1   23.58    3.34
  -3   6  -1   16.68    2.37
   3   6   1   27.51    3.22
  -3   6  -1   20.13    3.29
  -3   6  -1   21.38    2.68
   3   6   1   16.08    2.87
  -4  -6  -1   14.06    3.96
   4  -6   1    9.13    2.15
  -4  -6  -1   11.81    2.39
  -4  -6  -1   10.24    1.62
   4  -6   1    8.82    3.20
  -4   6  -1    9.77    1.78
  -4   6  -1    9.34    2.06
  -4   6  -1    8.98    2.78
   4   6   1    9.33    2.59
   5  -6   1   61.06    7.70
  -5  -6  -1   83.57    6.21
   5  -6   1   72.86    5.93
  -5  -6  -1   64.24    4.43
  -5   6  -1   66.88    5.18
  -5   6  -1   66.20    7.13
  -5   6  -1   71.01    4.66
   5   6   1   70.91    6.53
   6  -6   1   11.17    4.88
  -6  -6  -1   21.17    2.84
   6   6   1    7.48    4.43
  -6   6  -1   21.64    3.53
  -7  -6  -1   77.20    6.04
   7  -6   1   77.04   11.25
  -7   6  -1   81.80    5.78
   7   6   1   79.84    9.81
  -7  -7   1   -3.28    3.36
   7  -7  -1    0.33    6.32
  -7  -7   1    2.45    3.19
   7   7  -1   -1.04    5.61
  -7   7   1   -6.72    3.08
  -7   7   1    0.22    3.22
  -6  -7   1   53.31    5.63
  -6  -7   1   50.46    4.48
   6  -7  -1   50.62    9.49
  -6   7   1   50.17    4.75
   6   7  -1   50.29    7.09
  -6   7   1   48.71    5.32
   5  -7  -1    3.18    3.50
  -5  -7   1    3.01    3.02
   5  -7  -1    1.45    4.16
  -5  -7   1    6.47    2.26
  -5   7   1   10.41    2.46
   5   7  -1    0.45    3.15
  -5   7   1    8.23    2.44
  -4  -7   1  244.29   11.70
   4  -7  -1  268.42   14.65
  -4  -7   1  251.81   15.13
  -4   7   1  250.06   11.95
   4   7  -1  228.84   15.04
  -4   7   1  261.72   12.56
   3  -7  -1   15.79    2.82
  -3  -7   1    7.96    1.95
   3  -7  -1    7.47    2.42
   3  -7  -1    6.39    1.49
  -3   7   1    8.16    1.69
   3   7  -1    4.70    2.20
  -3   7   1   10.69    1.89
   3   7  -1   11.80    7.07
   3   7  -1    7.32    2.02
  -3   7   1    6.77    1.98
   2  -7  -1  129.03    6.22
   2  -7  -1  116.26   10.04
   2  -7  -1  129.15    7.83
  -2  -7   1  121.77    7.67
   2  -7  -1  127.61    8.44
   2   7  -1  115.27    7.60
   2   7  -1  123.26   12.05
  -2   7   1  128.52    6.60
  -2   7   1  124.37    7.98
  -2   7   1  130.37    6.10
   1  -7  -1   14.89    2.84
   1  -7  -1   14.89    3.85
  -1  -7   1   10.54    2.06
  -1  -7   1   16.67    1.62
   1  -7  -1   16.14    2.46
   1   7  -1   14.27    2.20
   1   7  -1   11.90    4.61
   1   7  -1   14.61    2.38
  -1   7   1   12.44    1.31
  -1   7   1   16.25    4.10
  -1   7   1   13.93    1.97
   0  -7   1   13.52    1.56
   0  -7   1    3.76    3.93
   0  -7  -1   13.78    1.42
   0  -7   1    9.20    1.45
   0  -7  -1    6.00    3.53
   0  -7  -1   12.10    2.25
   0  -7  -1   12.28    2.26
   0  -7   1   11.50    1.60
   0   7  -1    7.99    4.26
   0   7   1   11.41    1.54
   0   7   1    9.84    3.86
   0   7  -1    9.83    1.57
   0   7   1   12.26    1.79
   0   7  -1   11.12    2.08
   1  -7   1    5.16    1.06
   1  -7   1    9.49    1.53
   1  -7   1    6.88    1.12
   1  -7   1    5.52    1.94
   1  -7   1    8.71    1.55
   1  -7   1    8.93    2.58
  -1  -7  -1    7.44    1.61
  -1  -7  -1    5.29    1.41
   1   7   1    5.29    1.58
  -1   7  -1    7.01    1.33
  -1   7  -1    9.81    4.46
   1   7   1    5.25    3.87
  -1   7  -1    6.45    1.44
   1   7   1    8.05    1.58
   2  -7   1  207.96    9.42
   2  -7   1  212.92   12.66
   2  -7   1  201.91    9.70
   2  -7   1  185.69   15.27
  -2  -7  -1  201.04   11.88
   2  -7   1  194.46   11.67
  -2   7  -1  207.98    9.95
  -2   7  -1  208.90    9.45
   2   7   1  189.27   12.25
   2   7   1  205.50   11.91
   2   7   1  203.64   16.49
   3  -7   1   12.57    2.39
  -3  -7  -1   13.11    1.82
  -3  -7  -1   17.62    2.50
   3  -7   1   13.12    2.64
   3  -7   1   16.26    2.36
  -3   7  -1   14.41    2.65
   3   7   1   11.94    2.60
   3   7   1   26.19    6.53
  -3   7  -1   14.25    2.34
  -3   7  -1   22.15    2.76
   3   7   1   17.21    2.79
  -4  -7  -1  192.98   12.57
   4  -7   1  220.79   12.30
  -4  -7  -1  211.90    9.77
  -4   7  -1  208.18   10.48
  -4   7  -1  215.56   10.08
  -4   7  -1  195.44   13.47
   4   7   1  199.79   12.85
  -5  -7  -1    3.98    2.81
   5  -7   1    2.94    3.33
  -5  -7  -1    3.30    2.07
   5  -7   1   -2.21    3.71
   5   7   1   -1.26    3.24
  -5   7  -1    2.70    2.58
  -5   7  -1    3.77    2.38
   6  -7   1   12.10    5.36
  -6  -7  -1   12.07    2.63
  -6   7  -1   11.00    2.88
   6   7   1   12.36    4.57
  -6   7  -1   13.93    2.71
   7  -7   1   -2.41    6.69
  -7  -7  -1    3.82    3.19
  -7   7  -1    3.11    3.09
   7   7   1    4.22    5.91
  -7  -8   1   53.67    6.36
  -7  -8   1   56.54    5.59
   7  -8  -1   40.52    8.66
  -7   8   1   43.46    6.32
  -7   8   1   51.68    5.06
  -6  -8   1   22.34    4.11
  -6  -8   1   18.41    2.92
   6  -8  -1   10.23    6.37
  -6   8   1   20.88    3.42
  -6   8   1   21.44    3.21
   6   8  -1   10.13    4.60
   5  -8  -1   11.64    4.96
  -5  -8   1   14.95    2.26
  -5  -8   1   17.91    3.11
  -5   8   1   17.20    2.86
   5   8  -1   14.61    3.34
  -5   8   1   15.81    3.12
  -4  -8   1    1.06    2.66
  -4  -8   1    1.44    1.73
   4  -8  -1   -0.49    2.14
   4  -8  -1    0.15    3.39
  -4   8   1    0.52    2.21
   4   8  -1    1.46    2.50
  -4   8   1    2.78    2.15
   4   8  -1   -0.08    7.77
   3  -8  -1   34.21    4.69
   3  -8  -1   29.48    2.54
   3  -8  -1   36.91    4.51
  -3  -8   1   25.86    3.48
  -3   8   1   34.31    3.73
   3   8  -1   29.99    4.49
   3   8  -1   26.10    3.89
   3   8  -1   38.27    9.67
  -3   8   1   33.65    3.07
   2  -8  -1   26.91    2.27
  -2  -8   1   25.18    3.25
   2  -8  -1   38.88    3.91
   2  -8  -1   30.24    4.19
   2   8  -1   30.14    3.81
   2   8  -1   29.12    2.82
  -2   8   1   35.52    3.33
   2   8  -1   41.84    7.08
  -2   8   1   30.43    2.66
   1  -8  -1  273.96   15.98
   1  -8  -1  262.11   20.39
  -1  -8   1  271.81   15.51
   1  -8  -1  277.33   16.68
  -1  -8   1  273.18   12.23
  -1   8   1  239.91   12.27
  -1   8   1  286.77   13.01
   1   8  -1  264.67   20.88
   1   8  -1  267.94   12.80
  -1   8   1  290.61   20.83
   1   8  -1  263.71   15.58
   0  -8   1  205.71   11.36
   0  -8   1  172.67   11.05
   0  -8   1  178.74    8.82
   0  -8  -1  178.53   10.96
   0  -8  -1  196.47   12.23
   0  -8  -1  200.12   15.31
   0  -8   1  195.15   12.14
   0  -8  -1  199.67   11.87
   0  -8   1  190.31   15.08
   0   8  -1  186.92    9.36
   0   8  -1  210.04   15.85
   0   8   1  212.61   15.40
   0   8   1  181.90    9.38
  -1  -8  -1  139.79   14.82
   1  -8   1  171.09   10.94
   1  -8   1  177.29    8.29
   1  -8   1  179.61    8.02
   1  -8   1  167.27   13.28
  -1  -8  -1  159.14   10.12
  -1  -8  -1  167.43    9.95
   1  -8   1  170.03   10.31
   1  -8   1  175.18    9.79
  -1   8  -1  174.11    8.51
  -1   8  -1  181.77   14.68
   1   8   1  169.83    8.48
   1   8   1  169.42   14.15
  -1   8  -1  169.71    7.96
   1   8   1  179.74   10.11
   1   8   1  163.74   10.13
   2  -8   1    6.72    1.11
   2  -8   1   13.34    3.34
   2  -8   1    4.31    1.64
   2  -8   1    4.21    1.50
  -2  -8  -1    6.61    1.84
   2  -8   1    5.89    2.31
   2   8   1    8.02    2.49
   2   8   1    8.98    5.05
   2   8   1    6.42    2.28
  -2   8  -1    7.24    1.45
  -2   8  -1    6.69    1.92
   3  -8   1    0.71    1.60
   3  -8   1    0.25    2.79
  -3  -8  -1    0.74    1.14
  -3  -8  -1    5.29    2.21
   3  -8   1    1.65    1.95
   3  -8   1    2.91    2.23
   3   8   1   -2.97    3.17
  -3   8  -1    1.66    1.92
   3   8   1   -1.55    3.04
   3   8   1    4.13    6.30
  -3   8  -1    0.73    1.87
  -4  -8  -1    9.45    2.90
   4  -8   1    8.34    2.50
  -4  -8  -1    6.53    1.63
   4  -8   1    9.96    3.26
   4   8   1    7.20    3.46
  -4   8  -1    9.81    2.62
   4   8   1    5.76    8.17
  -4   8  -1    9.50    2.25
   5  -8   1   67.59    8.52
  -5  -8  -1   70.03    4.60
  -5  -8  -1   71.88    6.10
   5  -8   1   76.80    6.37
   5   8   1   56.25    6.85
  -5   8  -1   76.07    5.01
  -5   8  -1   67.97    5.19
  -6  -8  -1   19.00    2.72
   6  -8   1   13.17    5.87
   6   8   1   16.08    4.78
  -6   8  -1   20.21    3.22
  -6   8  -1   22.44    3.33
   7  -8   1   32.78    8.54
  -7   8  -1   58.53    5.48
  -7  -9   1    3.15    4.70
   7  -9  -1    0.81    7.76
  -7   9   1    4.57    4.15
  -7   9   1    0.94    3.89
   6  -9  -1    3.17    6.86
  -6  -9   1    8.85    3.63
  -6  -9   1    9.28    2.97
  -6   9   1    4.66    3.36
  -6   9   1   12.42    3.00
   5  -9  -1   83.19    8.99
  -5  -9   1   72.02    4.77
  -5  -9   1   76.66    6.54
  -5   9   1   86.57    6.00
   5   9  -1   65.88    6.78
   5   9  -1   56.39   13.80
  -5   9   1   84.59    5.38
   4  -9  -1   52.57    4.21
  -4  -9   1   46.53    5.16
   4  -9  -1   47.35    6.43
  -4  -9   1   46.43    3.48
   4   9  -1   32.50    9.27
  -4   9   1   39.79    4.62
  -4   9   1   48.72    3.96
   3  -9  -1   44.31    5.47
  -3  -9   1   40.45    4.51
  -3   9   1   47.79    3.93
   3   9  -1   50.46   10.49
  -3   9   1   41.17    3.35
   2  -9  -1   25.66    4.45
   2  -9  -1   25.23    3.96
  -2  -9   1   28.06    3.37
   2   9  -1   30.57    4.22
  -2   9   1   30.65    3.16
  -2   9   1   27.66    2.54
   2   9  -1   27.69    3.11
   2   9  -1   28.35    7.61
  -1  -9   1   16.95    1.75
  -1  -9   1   16.24    2.53
   1  -9  -1   15.35    2.82
   1  -9  -1   14.79    2.69
  -1   9   1   16.45    2.29
   1   9  -1   14.84    5.18
   1   9  -1   13.27    2.41
  -1   9   1   18.91    1.88
   1   9  -1   18.37    2.60
  -1   9   1   14.60    4.40
   0  -9  -1    9.26    1.65
   0  -9  -1    9.76    3.18
   0  -9   1    8.79    1.35
   0  -9  -1    6.14    3.75
   0  -9   1    9.27    2.27
   0  -9   1    8.87    1.51
   0  -9   1    6.23    2.48
   0  -9  -1    6.74    2.45
   0   9  -1   10.53    4.15
   0   9   1    8.64    1.70
   0   9  -1   10.67    2.34
   0   9   1    8.44    2.10
   0   9  -1   10.65    1.88
   0   9   1    8.07    4.49
   1  -9   1   59.80    5.36
  -1  -9  -1   62.00    5.53
   1  -9   1   64.33    3.61
   1  -9   1   55.60    3.47
   1  -9   1   60.18    4.64
   1  -9   1   59.04    3.81
  -1  -9  -1   51.62    4.28
  -1  -9  -1   59.95    4.18
   1   9   1   57.74    7.97
   1   9   1   53.30    4.11
  -1   9  -1   58.93    3.44
  -1   9  -1   54.82    3.87
   1   9   1   55.10    4.56
  -1   9  -1   57.99    8.70
   2  -9   1   20.09    4.09
   2  -9   1   25.38    2.44
  -2  -9  -1   25.07    3.11
   2  -9   1   18.51    3.25
   2  -9   1   27.60    2.97
   2   9   1   18.82    3.25
   2   9   1   21.10    5.94
   2   9   1   19.71    3.87
  -2   9  -1   27.48    3.04
  -2   9  -1   26.30    2.66
   3  -9   1  117.01    8.65
   3  -9   1  121.34    7.08
   3  -9   1  102.59    7.23
  -3  -9  -1  119.17    7.81
   3  -9   1  122.24    6.43
   3   9   1   98.33    8.39
  -3   9  -1  117.47    6.58
   3   9   1  114.39    8.58
  -3   9  -1  118.26    6.10
   3   9   1  114.78   12.25
  -4  -9  -1   44.84    5.23
   4  -9   1   51.68    4.51
   4  -9   1   44.38    6.64
  -4  -9  -1   42.34    3.09
   4   9   1   31.68    6.41
  -4   9  -1   41.97    4.67
  -4   9  -1   43.80    3.94
   4   9   1   41.61   10.85
  -5  -9  -1   36.75    3.67
  -5  -9  -1   45.57    5.73
   5  -9   1   37.99    8.45
   5   9   1   44.40   10.07
  -5   9  -1   41.31    4.35
   5   9   1   38.11    6.46
  -5   9  -1   55.18    4.88
  -6  -9  -1    5.91    2.80
   6  -9   1    0.25    6.50
  -6   9  -1    3.68    3.23
  -6   9  -1    6.27    3.16
   6   9   1    0.38    5.35
  -7   9  -1    7.14    4.10
   6 -10  -1   49.28   10.91
  -6 -10   1   47.83    6.54
  -6  10   1   54.37    5.89
   6  10  -1   35.46   10.83
  -6  10   1   59.96    5.78
  -5 -10   1   -1.05    3.05
  -5 -10   1    2.72    2.26
   5 -10  -1    1.91    5.14
   5  10  -1   -9.71    7.17
  -5  10   1    1.74    2.68
  -5  10   1    1.30    3.02
   4 -10  -1    2.58    3.84
  -4 -10   1   -0.60    1.79
  -4 -10   1   -0.65    2.88
   4  10  -1   -2.21    6.84
  -4  10   1   -4.01    2.36
  -4  10   1    2.02    2.70
   3 -10  -1    2.21    3.18
  -3 -10   1    2.93    2.59
   3  10  -1    1.23    2.71
  -3  10   1    3.68    2.29
   3  10  -1    1.45    7.17
  -3  10   1    2.89    2.15
  -2 -10   1   84.98    6.03
  -2 -10   1   71.45    4.22
   2 -10  -1   88.10    6.97
   2 -10  -1   83.36    7.18
  -2  10   1   88.28    5.52
   2  10  -1   70.23    6.62
   2  10  -1   83.09    5.08
  -2  10   1   85.16    4.59
   2  10  -1   80.03   11.06
   1 -10  -1    4.31    2.35
  -1 -10   1    1.98    1.16
   1 -10  -1    5.99    2.98
  -1 -10   1    1.81    1.75
  -1  10   1    2.33    1.47
   1  10  -1    5.57    2.49
  -1  10   1    5.70    2.03
   1  10  -1    3.68    4.62
  -1  10   1   -1.30    4.92
   1  10  -1    5.85    2.10
   0 -10   1  264.89   14.67
   0 -10   1  224.46   15.25
   0 -10   1  261.55   11.72
   0 -10  -1  261.59   16.08
   0 -10   1  263.62   16.22
   0 -10  -1  227.21   15.88
   0  10  -1  268.01   12.49
   0  10  -1  253.37   20.42
   0  10   1  262.67   12.47
   0  10   1  266.06   20.25
   1 -10   1    2.83    1.38
  -1 -10  -1    2.49    1.85
   1 -10   1    3.06    1.70
  -1 -10  -1    1.96    1.70
  -1 -10  -1    2.52    2.72
   1 -10   1    3.08    2.78
   1 -10   1    2.72    2.49
  -1  10  -1    0.88    2.26
  -1  10  -1   -5.52    5.53
   1  10   1    0.53    2.38
   1  10   1    1.97    4.95
   1  10   1   -1.68    2.40
   2 -10   1   22.69    3.60
   2 -10   1   19.91    2.33
   2 -10   1   25.63    4.79
  -2 -10  -1   24.11    3.57
   2 -10   1   24.23    4.86
   2  10   1   22.75    3.06
   2  10   1   24.68    6.64
   2  10   1   15.34    3.67
  -2  10  -1   27.43    6.86
  -2  10  -1   23.60    3.32
   2  10   1   23.68    3.36
  -2  10  -1   21.52    2.73
  -3 -10  -1    3.60    2.78
   3 -10   1    2.05    2.06
   3 -10   1    1.29    1.78
   3 -10   1   -4.32    3.23
   3  10   1    2.70    3.49
  -3  10  -1    4.97    2.08
  -3  10  -1    7.76    2.79
   3  10   1    0.43    6.93
  -4 -10  -1   29.39    2.74
  -4 -10  -1   29.78    4.94
   4 -10   1   35.10    4.21
   4 -10   1   28.16    4.53
   4  10   1   27.09    8.83
   4  10   1   18.44    4.86
  -4  10  -1   31.40    3.72
  -4  10  -1   32.78    4.03
   5 -10   1   -1.97    5.12
  -5  10  -1    1.97    2.90
  -5  10  -1    2.18    2.57
   5  10   1   -3.35    5.46
   5  10   1   -0.89    8.44
   6 -10   1   56.97   11.63
  -6  10  -1   60.48    5.77
  -6  10  -1   58.79    5.60
   6  10   1   35.51   10.00
   6 -11  -1    9.17    8.42
  -6 -11   1    4.61    4.10
  -6  11   1    5.89    4.07
  -6  11   1    5.81    3.30
   6  11  -1   18.80    9.87
   5 -11  -1   45.71    9.33
  -5 -11   1   52.97    6.01
   5  11  -1   41.03    9.20
  -5  11   1   51.04    5.57
  -5  11   1   50.39    5.52
   4 -11  -1   16.37    4.62
  -4 -11   1   21.71    2.78
  -4 -11   1   22.63    4.43
  -4  11   1   28.92    4.28
  -4  11   1   26.37    4.19
   4  11  -1   30.14    8.39
   3 -11  -1   94.18    8.59
  -3 -11   1  100.98    7.49
  -3  11   1  102.97    5.87
   3  11  -1   99.62    6.26
  -3  11   1  103.88    6.67
   3  11  -1  119.68   13.28
   2 -11  -1   -2.09    3.19
  -2 -11   1    5.57    2.55
   2 -11  -1    6.78    4.06
  -2  11   1    4.12    2.41
   2  11  -1    4.37    6.79
   2  11  -1    3.66    2.41
  -2  11   1    4.85    1.95
   2  11  -1    2.48    4.14
   1 -11  -1    4.86    3.03
  -1 -11   1    9.61    2.01
   1 -11  -1    6.74    3.61
  -1  11   1    2.41    4.67
   1  11  -1   10.24    3.16
  -1  11   1   11.73    2.76
   1  11  -1    7.05    2.45
  -1  11   1    4.66    1.75
   1  11  -1    3.58    5.31
   0 -11  -1    2.65    3.02
   0 -11   1    8.79    1.66
   0 -11  -1    1.75    4.78
   0 -11   1    6.46    1.70
   0 -11   1    8.18    3.13
   0  11  -1    3.36    6.02
   0  11   1    7.49    5.93
   0  11   1    2.39    2.56
   0  11  -1    2.88    3.65
   0  11   1    8.63    2.73
   0  11  -1    6.54    2.50
   1 -11   1   84.25    5.07
  -1 -11  -1   75.96    7.07
   1 -11   1   76.34    7.10
   1 -11   1   83.67    4.68
   1 -11   1   68.10    6.34
  -1 -11  -1   76.03    5.36
  -1  11  -1   80.53    5.48
   1  11   1   81.62    5.61
  -1  11  -1   81.07   10.14
   1  11   1   80.24    9.46
  -2 -11  -1    6.63    2.26
   2 -11   1    6.10    3.47
   2 -11   1    9.84    2.70
   2 -11   1    8.83    3.71
  -2  11  -1    8.94    2.55
  -2  11  -1    3.93    6.93
   2  11   1    1.61    6.19
   2  11   1    7.65    3.07
  -2  11  -1    5.29    2.09
   2  11   1    2.44    3.87
   3 -11   1  124.78    7.68
  -3 -11  -1  123.97    8.69
   3 -11   1  136.79    7.63
   3 -11   1  120.58    9.95
  -3  11  -1  128.94    7.75
  -3  11  -1  129.75    6.87
   3  11   1  128.88   13.53
   4 -11   1   31.49    6.71
  -4 -11  -1   25.50    5.22
  -4  11  -1   25.68    3.48
  -4  11  -1   30.13    5.03
   4  11   1   46.53    9.54
   5 -11   1   29.33    6.42
  -5  11  -1   42.74    4.68
   5  11   1   34.23   10.86
  -5  11  -1   37.83    4.91
   6 -11   1    5.72    8.31
  -6  11  -1    4.29    3.04
   6  11   1    5.77   10.97
  -6  11  -1    5.50    4.43
   6 -12  -1   -1.24    8.56
  -6 -12   1   12.93    4.66
  -6  12   1   13.70    5.37
   5 -12  -1    6.40    6.22
  -5 -12   1   10.33    4.54
   5  12  -1   13.42    8.69
  -5  12   1   11.82    3.87
  -5  12   1   12.23    3.79
   4 -12  -1    4.90    4.59
  -4 -12   1    1.71    3.53
   4  12  -1    1.27    3.38
  -4  12   1   -4.21    3.36
  -4  12   1   -2.67    2.81
   4  12  -1   23.64    9.12
   3 -12  -1   11.50    4.18
  -3 -12   1   17.61    3.31
  -3  12   1   17.54    2.79
  -3  12   1   17.33    3.08
   3  12  -1   21.95    7.51
   3  12  -1   16.89    3.31
   2 -12  -1    8.35    5.29
  -2 -12   1    8.88    2.58
   2 -12  -1    6.19    3.65
   2  12  -1   10.69    4.75
  -2  12   1    6.12    2.80
   2  12  -1   12.61    3.05
   2  12  -1    8.91    6.87
  -2  12   1   10.40    2.20
   1 -12  -1   79.41    8.73
  -1 -12   1   77.22    5.88
  -1 -12   1   98.26    7.94
   1 -12  -1   86.01    7.55
   1  12  -1   64.06    7.12
   1  12  -1   91.47   11.20
  -1  12   1   84.48    5.72
   1  12  -1   90.52    5.92
  -1  12   1   98.00   10.85
   0 -12   1   67.71    3.99
   0 -12   1   63.32    6.80
   0 -12  -1   64.08    6.12
   0 -12   1   71.44    4.75
   0  12  -1   57.36    5.12
   0  12   1   55.60   10.08
   0  12  -1   53.34   10.44
   0  12   1   59.47    5.43
  -1 -12  -1   80.69    7.13
   1 -12   1   68.51    7.09
   1 -12   1   71.00    4.59
   1 -12   1   65.29    7.02
   1 -12   1   72.83    4.81
   1  12   1   74.22    5.63
  -1  12  -1   78.20   10.05
  -1  12  -1   76.81    5.54
   1  12   1   55.40   10.23
   1  12   1   55.69    6.33
  -2 -12  -1   23.84    4.00
   2 -12   1   20.28    4.90
  -2 -12  -1   26.60    5.00
   2 -12   1   20.06    3.89
   2  12   1   13.90    4.80
  -2  12  -1   17.20    2.78
  -2  12  -1   19.04    7.89
   2  12   1   29.78    7.40
   2  12   1   18.64    3.61
  -2  12  -1   27.96    4.63
   3 -12   1   -2.68    4.05
  -3 -12  -1   -0.09    2.86
   3  12   1   -0.25    8.04
  -3  12  -1    1.04    3.29
   3  12   1   -1.96    3.59
  -3  12  -1    4.08    2.74
   4 -12   1    2.30    4.58
  -4  12  -1    4.87    3.60
   4  12   1   21.39    9.28
  -4  12  -1    4.32    3.38
   5 -12   1   18.21    6.95
  -5  12  -1   35.16    4.68
  -5  12  -1   31.70    3.87
   5  12   1   42.29   11.34
   6 -12   1   16.85    8.53
   6  12   1   19.19   13.23
  -6  12  -1   21.20    5.33
  -5 -13   1    5.80    4.86
   5 -13  -1    6.74    6.91
  -5  13   1    2.53    4.12
  -5  13   1    1.17    3.99
  -4 -13   1   89.72    8.17
   4 -13  -1   84.05    9.82
  -4  13   1   91.93    6.71
  -4  13   1   89.16    6.64
   4  13  -1  115.08   14.82
  -3 -13   1    6.92    3.27
   3 -13  -1    4.97    4.48
  -3  13   1    5.94    2.84
  -3  13   1   11.03    3.63
   3  13  -1   13.04    3.52
   3  13  -1   19.30    8.59
   2 -13  -1   57.23    6.72
  -2 -13   1   63.13    5.70
  -2  13   1   70.41    5.89
  -2  13   1   51.73    4.40
   2  13  -1   57.43    5.55
   2  13  -1   64.63   10.74
   1 -13  -1    0.65    3.61
  -1 -13   1    0.85    3.11
  -1 -13   1   -0.26    2.47
   1  13  -1   -2.98    5.87
   1  13  -1    5.43    2.97
  -1  13   1    3.30    2.91
  -1  13   1   -3.05    6.45
   0 -13   1    7.40    2.22
   0 -13   1    7.52    3.79
   0 -13  -1    5.51    3.59
   0  13   1    4.42    5.96
   0  13  -1   17.19    7.48
   0  13   1    4.70    3.39
   0  13  -1   10.17    3.14
   1 -13   1    9.75    4.06
  -1 -13  -1    3.20    3.76
  -1  13  -1    6.85    6.39
   1  13   1    0.64    6.80
  -1  13  -1   10.73    3.42
   1  13   1   11.25    3.48
  -2 -13  -1   87.40    8.25
   2 -13   1   86.40    8.72
   2  13   1   88.95    6.79
  -2  13  -1   88.13    6.82
   2  13   1   85.19   11.77
  -3 -13  -1   12.91    4.55
   3 -13   1    5.14    4.79
   3  13   1    3.49    4.48
  -3  13  -1    2.95    2.96
   3  13   1    1.61    7.29
  -3  13  -1    0.76    3.35
   4 -13   1   80.87   11.00
   4  13   1   91.33    8.47
  -4  13  -1   97.28    6.92
  -4  13  -1  111.45    7.78
   4  13   1  104.28   14.15
   5 -13   1   -1.53    7.20
  -5  13  -1   -0.80    3.56
   5  13   1   25.18   10.61
  -5  13  -1    1.71    4.14
   4 -14  -1   -8.10    5.55
  -4 -14   1    0.88    4.49
  -4  14   1   -1.57    4.16
   4  14  -1   14.17   10.80
  -3 -14   1   21.09    4.05
   3 -14  -1   21.42    5.38
  -3  14   1   22.11    4.47
   3  14  -1   11.85    9.45
   3  14  -1   23.15    4.85
  -2 -14   1   12.88    4.59
   2 -14  -1    4.29    4.55
  -2 -14   1    4.73    3.29
   2  14  -1    9.22    3.90
   2  14  -1   22.09    8.17
  -2  14   1   11.49    4.01
  -1 -14   1  109.69    9.50
  -1 -14   1  111.95    7.78
   1 -14  -1  105.47    9.53
   1  14  -1  103.52    7.23
  -1  14   1  110.52    7.79
   1  14  -1  109.85   13.11
  -1  14   1  109.45   12.99
   0 -14  -1    6.99    3.55
   0 -14   1    9.23    4.45
   0  14  -1    4.87    3.68
   0  14  -1    3.80    6.86
   0  14   1   25.95    7.99
   0  14   1    2.52    3.83
   1 -14   1   56.54    7.02
  -1 -14  -1   56.03    7.17
  -1  14  -1   58.75    5.64
  -1  14  -1   60.52   11.10
   1  14   1   61.21    6.27
   1  14   1   55.19    9.84
  -2 -14  -1    5.85    4.36
   2 -14   1   -0.66    4.91
  -2  14  -1   -4.92    3.99
   2  14   1    3.14    4.12
   2  14   1   10.33    7.17
   3 -14   1   -1.66    5.36
  -3 -14  -1    6.43    4.32
  -3  14  -1    1.19    3.44
   3  14   1    7.03    8.11
  -3  14  -1    3.77    4.38
   3  14   1    4.74    5.23
  -4 -14  -1    6.47    5.88
   4 -14   1  -10.98    5.91
  -4  14  -1    6.24    4.19
  -4  14  -1   -4.21    3.84
   4  14   1   28.45   11.66
   4 -15  -1   30.24    7.48
  -4  15   1   53.84    6.75
  -3 -15   1   21.60    5.76
   3 -15  -1   11.78    5.94
   3  15  -1   33.88   10.47
  -3  15   1   29.54    5.27
   2 -15  -1   19.51    5.75
  -2 -15   1   12.00    4.53
   2  15  -1   43.59   11.41
   2  15  -1   17.12    4.26
  -2  15   1   18.26    4.40
  -1 -15   1    3.93    4.83
   1 -15  -1    4.40    4.70
   1  15  -1    6.65    8.61
  -1  15   1    2.99    4.45
   1  15  -1   -4.43    4.38
  -1  15   1   12.79    6.91
   0 -15  -1    3.17    4.52
   0 -15   1    6.42    4.15
   0  15  -1   -1.67    4.02
   0  15  -1    0.67    7.36
   0  15   1    8.86    3.81
   0  15   1    0.55    8.33
  -1 -15  -1    9.26    4.85
   1 -15   1   13.21    5.50
   1  15   1   24.54    4.68
  -1  15  -1   26.96    8.62
  -1  15  -1   13.12    4.47
   1  15   1   27.82    9.03
  -2 -15  -1   34.07    6.60
   2 -15   1   24.95    6.28
   2  15   1   61.41   12.43
   2  15   1   40.53    6.87
  -2  15  -1   33.37    5.22
   3 -15   1   21.58    6.60
  -3 -15  -1   38.47    8.25
   3  15   1   30.66    5.60
  -3  15  -1   24.46    5.35
  -4 -15  -1   22.07    7.10
   4 -15   1   17.84    7.50
   4  15   1   34.82   13.83
   3 -16  -1   -6.65    6.81
  -3  16   1    8.41    4.93
  -2 -16   1   18.89    5.71
   2 -16  -1   16.85    6.46
  -2  16   1   14.33    5.53
   2  16  -1   19.23    9.22
   1 -16  -1   10.09    4.89
   1  16  -1    7.90    4.79
  -1  16   1   12.83    5.34
   1  16  -1   13.68    8.75
   0 -16  -1   40.62    8.03
   0 -16   1   51.32    7.69
   0  16   1   44.01    7.53
   0  16  -1   48.69   12.84
   0  16  -1   55.90    7.27
   0  16   1   76.81   12.51
  -1 -16  -1   10.62    5.28
   1 -16   1   13.75    5.53
   1  16   1   13.08    5.31
  -1  16  -1   25.48    8.58
   1  16   1   35.33   10.26
  -1  16  -1   17.75    5.24
   2 -16   1   13.23    6.78
  -2 -16  -1    9.10    4.97
  -2  16  -1    3.26    4.63
   2  16   1   20.17   10.66
   2  16   1   12.29    5.52
   3 -16   1   -8.35    7.19
  -3  16  -1    1.08    5.80
  -1  17   1    8.91    6.26
   0  17  -1    0.75    6.45
   0  17   1   -1.87    5.95
   1 -17   1   18.04    7.77
  -1  17  -1   17.22    6.23
   1  17   1   17.29    6.26
  -8   0   2   64.70    5.44
  -7   0   2    2.34    2.77
   7   0  -2    1.64    4.59
  -6   0   2   68.84    5.83
  -6   0   2   65.94    4.66
   6   0  -2   55.80    7.55
   5   0  -2    0.64    2.15
  -5   0   2    4.68    2.54
  -5   0   2   -0.37    1.86
   5   0  -2    2.12    3.22
  -5   0   2   -3.15    4.18
  -4   0   2   75.62    5.45
   4   0  -2   76.69    6.31
  -4   0   2   75.28    4.26
   4   0  -2   78.17    4.22
  -4   0   2   62.73    6.06
   4   0  -2   76.19    4.97
  -3   0   2    0.37    1.57
   3   0  -2   -0.01    1.02
  -3   0   2    1.16    1.27
  -3   0   2    1.24    2.05
   3   0  -2    0.45    1.39
   2   0  -2  262.79   16.86
   2   0  -2  281.63   12.97
  -2   0   2  276.12   15.89
  -2   0   2  275.69   16.81
   2   0  -2  297.96   15.92
  -2   0   2  278.89   12.98
  -1   0   2   -1.82    0.65
   1   0  -2   -2.07    0.95
   1   0  -2   -0.30    0.59
  -1   0   2   -0.94    1.20
  -1   0   2    2.72    1.31
   1   0  -2    0.47    0.93
  -1   0   2   -0.89    0.84
   0   0  -2  775.26   43.84
   0   0  -2  800.62   44.86
   0   0   2  791.86   44.87
   0   0  -2  796.29   45.74
   0   0   2  711.73   43.81
   0   0   2  815.99   45.74
   1   0   2    0.50    0.66
   1   0   2    0.40    1.07
  -1   0  -2   -0.30    1.00
  -1   0  -2   -0.22    0.78
   2   0   2  130.67    6.21
  -2   0  -2  145.60    8.04
  -2   0  -2  110.43    6.21
   2   0   2  126.28    7.79
   2   0   2  133.74    8.07
   2   0   2  147.24    8.01
   3   0   2   -1.17    1.73
   3   0   2    4.02    1.73
   3   0   2   -0.60    1.18
  -3   0  -2   -0.09    1.47
  -3   0  -2    0.23    1.31
   3   0   2   -1.70    0.96
   3   0   2    0.00    1.00
  -4   0  -2  183.44    8.67
   4   0   2  171.58   11.21
  -4   0  -2  179.71   11.50
   4   0   2  173.45   11.25
   4   0   2  184.59    8.50
   4   0   2  183.35    8.82
   4   0   2  184.26   10.63
   5   0   2    3.07    2.67
  -5   0  -2    1.95    1.88
  -5   0  -2    1.98    3.20
  -6   0  -2   79.31    9.38
  -6   0  -2  101.10    5.66
   6   0   2   90.39    7.37
   7   0   2    0.04    3.26
  -7   0  -2    2.92    2.79
  -8   0  -2   51.50    5.74
   8   0   2   41.09    6.98
  -8  -1   2   -1.95    3.73
   8  -1  -2    6.50    6.18
  -8   1   2    1.34    2.94
  -7  -1   2   26.04    5.04
   7  -1  -2   16.70    5.17
  -7  -1   2   23.75    3.33
  -7   1   2   26.44    3.84
   6  -1  -2   19.75    4.62
  -6  -1   2   27.52    4.36
  -6  -1   2   30.45    3.56
  -6   1   2   30.99    4.39
  -6   1   2   24.46    3.11
   6   1  -2   21.74    4.40
  -5  -1   2  203.79    9.80
  -5  -1   2  177.65   14.31
   5  -1  -2  210.03   10.36
   5  -1  -2  208.11   13.66
  -5  -1   2  214.42   12.53
  -5   1   2  184.62   14.24
   5   1  -2  198.57   10.16
  -5   1   2  209.19    9.89
  -5   1   2  210.83   12.33
   5   1  -2  203.88   13.51
  -4  -1   2   20.63    2.40
   4  -1  -2   24.29    4.60
  -4  -1   2   21.43    3.06
   4  -1  -2   22.30    2.61
  -4  -1   2   15.21    2.82
   4  -1  -2   22.73    2.33
  -4   1   2   19.52    2.86
  -4   1   2   24.48    2.62
   4   1  -2   20.13    4.30
   4   1  -2   23.70    2.40
  -4   1   2   18.99    3.53
   4   1  -2   22.60    2.37
  -4   1   2   22.36    2.49
   3  -1  -2  216.13   10.64
   3  -1  -2  227.70   14.22
   3  -1  -2  242.14   13.04
  -3  -1   2  224.81   13.20
  -3  -1   2  231.80   14.15
   3   1  -2  220.14   13.02
  -3   1   2  222.59   13.03
   3   1  -2  224.33   10.61
  -3   1   2  218.44   10.73
  -3   1   2  213.66   13.82
   3   1  -2  227.41   14.20
  -2  -1   2    9.14    1.11
  -2  -1   2    9.99    1.83
   2  -1  -2    7.61    1.95
   2  -1  -2    8.16    0.97
   2  -1  -2    8.25    1.55
  -2  -1   2    9.46    1.73
   2   1  -2    7.95    1.59
  -2   1   2    7.32    1.57
  -2   1   2    7.99    1.27
  -2   1   2    9.22    1.35
   2   1  -2    9.95    2.09
   2   1  -2    8.97    1.12
   1  -1  -2   26.20    2.36
   1  -1  -2   25.39    1.90
   1  -1  -2   27.55    1.77
  -1  -1   2   25.78    2.13
  -1  -1   2   23.89    1.38
  -1  -1   2   24.84    2.17
  -1   1   2   25.60    2.03
   1   1  -2   30.72    2.29
  -1   1   2   28.46    2.39
   1   1  -2   27.09    2.13
  -1   1   2   26.58    1.70
   0  -1  -2    9.15    1.86
   0  -1   2    5.67    1.34
   0  -1  -2    5.92    1.28
   0  -1   2   10.52    1.78
   0  -1   2    3.07    1.19
   0   1  -2    9.61    1.68
   0   1   2    6.33    1.39
   0   1   2    6.19    1.88
   0   1  -2    5.09    1.37
   1  -1   2  416.53   23.97
   1  -1   2  420.22   24.32
  -1  -1  -2  395.77   23.94
   1  -1   2  422.69   18.66
  -1  -1  -2  408.61   18.62
   1  -1   2  428.43   19.23
   1   1   2  395.31   23.96
   1   1   2  411.86   18.62
  -1   1  -2  430.94   18.68
  -1   1  -2  427.49   23.98
   2  -1   2   26.74    1.93
  -2  -1  -2   28.61    1.92
   2  -1   2   29.23    2.90
  -2  -1  -2   33.76    2.81
   2  -1   2   34.76    2.40
   2  -1   2   31.07    2.33
   2   1   2   29.16    2.79
  -2   1  -2   29.05    2.16
  -2   1  -2   28.22    1.94
   2   1   2   27.45    2.40
   2   1   2   25.11    1.89
  -3  -1  -2  427.38   23.94
   3  -1   2  434.35   23.83
  -3  -1  -2  400.00   18.22
   3  -1   2  406.49   22.82
   3  -1   2  393.89   18.75
   3  -1   2  400.76   18.21
   3   1   2  388.70   18.18
   3   1   2  384.36   23.43
   3   1   2  389.53   22.84
  -3   1  -2  397.69   18.26
  -3   1  -2  389.04   23.69
   4  -1   2   32.87    2.74
   4  -1   2   33.55    2.20
  -4  -1  -2   30.14    4.78
  -4  -1  -2   35.67    2.77
   4  -1   2   40.61    3.99
   4  -1   2   34.80    2.55
  -4   1  -2   35.26    3.78
  -4   1  -2   34.55    2.61
   4   1   2   35.79    2.85
   4   1   2   37.95    3.80
   4   1   2   33.92    2.79
   5  -1   2   71.76    5.97
  -5  -1  -2   68.96    7.62
  -5  -1  -2   69.09    4.69
   5  -1   2   71.74    6.34
  -5   1  -2   71.42    6.31
  -5   1  -2   74.69    4.58
   5   1   2   80.61    6.10
   6  -1   2    8.31    3.20
  -6  -1  -2   -0.59    5.31
   6  -1   2    7.54    3.40
  -6  -1  -2    7.14    2.42
  -6   1  -2    8.19    4.47
   6   1   2    2.08    3.13
  -6   1  -2    1.27    2.27
  -7  -1  -2    6.32    2.86
   7  -1   2    3.39    3.36
  -7   1  -2    5.82    2.72
   7   1   2    6.91    3.59
   8  -1   2    9.50    4.69
  -8  -1  -2    7.90    3.62
  -8   1  -2    8.52    3.55
   8   1   2   10.50    5.44
  -8  -2   2   29.13    4.77
   8  -2  -2   27.90    6.98
  -8   2   2   39.63    4.32
   8   2  -2   35.43    6.68
   7  -2  -2   33.42    6.36
  -7  -2   2   46.94    5.45
  -7  -2   2   42.85    4.21
  -7   2   2   43.94    4.21
  -6  -2   2   29.00    3.63
  -6  -2   2   26.86    4.32
   6  -2  -2   16.48    4.69
  -6   2   2   33.10    3.46
   6   2  -2   23.66    3.68
  -5  -2   2    1.30    4.56
   5  -2  -2    3.42    3.56
  -5  -2   2    7.06    2.36
  -5  -2   2    6.84    2.04
  -5   2   2    6.28    2.22
  -5   2   2    1.99    3.70
   5   2  -2    5.56    2.08
  -5   2   2    8.84    1.89
  -5   2   2    7.84    2.26
   4  -2  -2   17.03    2.35
   4  -2  -2   17.62    3.40
  -4  -2   2   15.80    2.89
  -4  -2   2   16.27    2.85
   4  -2  -2   17.02    2.15
  -4   2   2   21.08    2.96
   4   2  -2   20.33    2.10
   4   2  -2   14.75    3.09
   4   2  -2   18.63    2.50
  -4   2   2   18.21    3.18
  -4   2   2   18.48    2.45
  -4   2   2   18.15    2.65
  -3  -2   2   84.39    5.83
   3  -2  -2   90.04    5.58
  -3  -2   2   92.20    7.03
   3  -2  -2   96.07    6.94
   3  -2  -2   91.99    4.64
   3   2  -2   85.82    4.51
  -3   2   2   87.56    4.85
  -3   2   2   90.35    6.05
   3   2  -2   90.00    5.72
  -3   2   2   86.80    5.73
   3   2  -2   82.65    6.89
  -3   2   2   84.90    4.59
   2  -2  -2   84.14    4.94
  -2  -2   2   87.24    6.06
   2  -2  -2   79.55    4.16
  -2  -2   2   77.85    5.15
   2  -2  -2   84.61    5.82
  -2   2   2   83.20    4.93
  -2   2   2   83.81    5.42
   2   2  -2   83.55    6.00
   2   2  -2   72.45    3.92
  -2   2   2   79.76    4.18
   2   2  -2   80.81    5.08
   1  -2  -2  791.15   41.19
  -1  -2   2  631.41   40.19
   1  -2  -2  684.87   40.09
   1  -2  -2  741.87   42.11
  -1  -2   2  784.66   42.18
   1  -2  -2  715.79   32.97
  -1   2   2  713.40   32.97
  -1   2   2  724.21   42.10
   1   2  -2  669.28   40.21
  -1   2   2  666.19   40.09
   1   2  -2  710.66   41.04
  -1   2   2  771.21   41.18
   0  -2   2  256.39   13.00
   0  -2  -2  278.06   20.58
   0  -2   2  277.88   15.96
   0  -2  -2  313.53   16.49
   0  -2  -2  275.31   16.71
   0  -2   2  307.36   16.25
   0  -2   2  283.36   20.59
   0   2  -2  283.19   15.99
   0   2  -2  275.21   13.01
   0   2   2  304.41   16.44
   0   2   2  273.50   16.69
   0   2  -2  294.13   16.23
   0   2   2  264.01   20.42
   0   2  -2  262.40   20.64
  -1  -2  -2  148.65    8.09
   1  -2   2  141.44    8.12
   1  -2   2  127.39    8.04
   1  -2   2  130.53    6.46
  -1  -2  -2  125.44    6.17
   1  -2   2  135.72    6.29
   1  -2   2  142.95   10.14
  -1   2  -2  135.71    6.54
   1   2   2  148.55    8.16
   1   2   2  135.37    7.87
  -1   2  -2  128.68    6.28
   1   2   2  127.88    6.16
   2  -2   2    9.66    1.26
   2  -2   2    6.60    1.22
   2  -2   2   10.82    1.54
  -2  -2  -2   10.03    1.24
  -2   2  -2    8.00    1.15
  -2   2  -2   11.65    1.93
  -2   2  -2   10.83    1.45
   2   2   2    8.55    1.24
   2   2   2   10.94    2.13
   2   2   2    8.71    1.62
   3  -2   2   15.88    1.83
   3  -2   2   13.73    1.69
   3  -2   2   24.04    3.01
  -3  -2  -2   14.95    1.91
  -3  -2  -2   14.53    2.52
   3  -2   2   18.28    2.12
   3   2   2   14.02    2.02
  -3   2  -2   14.24    1.93
  -3   2  -2   14.38    2.27
   3   2   2   15.44    2.87
   3   2   2   14.25    1.67
   4  -2   2   40.46    2.55
  -4  -2  -2   37.70    5.16
   4  -2   2   42.69    4.49
  -4  -2  -2   40.54    2.92
   4  -2   2   40.87    2.63
   4  -2   2   43.45    3.33
   4   2   2   39.52    3.07
   4   2   2   38.02    4.07
  -4   2  -2   44.55    3.07
  -4   2  -2   38.87    3.77
  -5  -2  -2  107.83    5.67
   5  -2   2   95.68    7.86
  -5  -2  -2   92.32    9.41
  -5   2  -2  105.75    5.59
   5   2   2  106.48    7.62
  -5   2  -2  100.65    7.56
  -6  -2  -2   34.99    3.80
   6  -2   2   38.50    4.90
  -6  -2  -2   31.31    6.24
   6  -2   2   33.44    5.86
   6   2   2   43.63    5.62
  -6   2  -2   36.35    3.81
  -6   2  -2   36.86    7.33
   7  -2   2   67.03    6.39
  -7  -2  -2   70.20    5.41
  -7   2  -2   73.91    5.27
   7   2   2   73.45    7.87
   8  -2   2   15.44    4.64
  -8  -2  -2   17.84    3.80
  -8   2  -2   14.05    3.14
   8   2   2   18.01    5.98
   8  -3  -2   -2.73    6.26
  -8  -3   2    6.10    3.92
  -8   3   2   -1.51    3.14
   8   3  -2    3.38    6.07
  -7  -3   2    3.25    3.15
  -7  -3   2    2.82    2.95
   7  -3  -2   -1.98    5.11
  -7   3   2    3.60    2.63
   6  -3  -2   70.62    9.07
  -6  -3   2   71.95    6.00
  -6  -3   2   75.83    4.96
   6   3  -2   65.23    6.07
  -6   3   2   68.41    4.80
   5  -3  -2    9.10    3.04
  -5  -3   2    7.67    2.45
   5  -3  -2    2.54    3.62
  -5  -3   2    7.05    2.32
  -5   3   2   10.74    3.78
   5   3  -2    9.33    2.29
  -5   3   2    6.74    2.37
  -5   3   2   10.51    2.62
  -5   3   2   11.79    2.25
   4  -3  -2  247.95   13.76
  -4  -3   2  231.24   13.86
  -4  -3   2  215.95   14.82
   4  -3  -2  230.69   15.11
   4  -3  -2  248.46   11.31
   4   3  -2  229.04   11.21
  -4   3   2  246.28   11.47
  -4   3   2  236.97   11.02
   4   3  -2  225.48   13.72
  -4   3   2  225.14   14.50
  -4   3   2  240.39   13.81
   3  -3  -2    3.29    2.41
   3  -3  -2    6.01    1.21
  -3  -3   2    5.71    1.73
  -3  -3   2    4.35    2.57
   3  -3  -2    4.70    1.34
  -3   3   2    6.06    1.40
   3   3  -2    5.07    1.45
  -3   3   2    3.07    1.51
  -3   3   2    5.37    1.44
   3   3  -2    4.47    1.11
  -3   3   2    6.36    1.50
   2  -3  -2  132.15    7.91
  -2  -3   2  120.79    7.72
   2  -3  -2  125.29    6.25
   2  -3  -2  128.93    7.43
   2  -3  -2  131.35    8.41
  -2  -3   2  138.34    8.73
  -2   3   2  125.78    8.09
  -2   3   2  124.32    6.37
  -2   3   2  130.68    6.18
   2   3  -2  118.02    7.63
  -2   3   2  133.70    7.48
   1  -3  -2   40.76    2.41
   1  -3  -2   41.68    2.39
   1  -3  -2   45.11    3.39
   1  -3  -2   35.53    4.13
  -1  -3   2   36.52    2.81
   1  -3  -2   41.93    2.97
  -1   3   2   39.97    2.43
  -1   3   2   42.74    3.15
   1   3  -2   39.83    2.57
   1   3  -2   33.51    2.00
  -1   3   2   41.71    3.16
  -1   3   2   42.64    2.62
   1   3  -2   35.09    2.77
   0  -3   2  177.64   10.20
   0  -3  -2  176.89   13.51
   0  -3  -2  196.70   10.64
   0  -3   2  182.67   13.48
   0  -3   2  153.67    8.28
   0  -3   2  183.90    8.16
   0  -3   2  174.74   10.29
   0  -3  -2  188.85   10.82
   0   3   2  181.07   10.55
   0   3  -2  165.54   13.58
   0   3  -2  185.96   10.25
   0   3  -2  165.92    8.30
   0   3   2  179.07   13.26
   0   3   2  178.25   10.73
   1  -3   2   12.25    1.64
  -1  -3  -2   13.60    0.93
   1  -3   2   12.48    1.27
   1  -3   2   11.08    1.22
  -1  -3  -2   13.19    1.76
   1  -3   2   10.76    2.53
   1   3   2   11.96    2.42
  -1   3  -2   12.93    1.41
  -1   3  -2   11.76    2.56
   1   3   2   11.45    0.89
   1   3   2   13.35    1.62
  -1   3  -2   13.11    1.42
   1   3   2   16.31    3.05
   2  -3   2  262.55   19.39
   2  -3   2  272.02   12.04
  -2  -3  -2  242.16   11.90
   2  -3   2  269.60   12.41
  -2  -3  -2  263.41   15.42
   2  -3   2  268.55   15.69
  -2   3  -2  280.96   15.66
   2   3   2  240.69   15.48
  -2   3  -2  259.64   12.08
   2   3   2  260.17   11.92
  -2   3  -2  267.52   12.54
   2   3   2  268.57   15.13
   3  -3   2   14.91    1.41
   3  -3   2   19.10    2.11
   3  -3   2   14.62    1.70
   3  -3   2   18.66    2.84
  -3  -3  -2   14.80    1.91
  -3  -3  -2   10.94    2.35
   3   3   2   15.01    2.80
   3   3   2   13.39    2.03
  -3   3  -2   14.19    2.12
  -3   3  -2   16.08    2.35
  -3   3  -2   17.01    2.26
  -4  -3  -2  250.85   11.62
  -4  -3  -2  244.17   15.69
   4  -3   2  265.87   15.42
   4  -3   2  240.63   14.45
   4  -3   2  246.78   11.88
   4  -3   2  243.77   11.56
   4   3   2  265.88   15.09
  -4   3  -2  254.06   11.71
  -4   3  -2  255.27   15.16
   4   3   2  218.81   14.40
  -5  -3  -2    7.18    1.94
  -5  -3  -2   -6.38    4.14
   5  -3   2    1.27    3.21
  -5   3  -2    2.22    1.95
   5   3   2    2.14    2.83
  -5   3  -2    0.84    2.66
  -6  -3  -2    3.38    2.29
  -6  -3  -2    3.64    6.08
   6  -3   2    3.62    2.48
   6  -3   2    2.83    3.73
  -6   3  -2    0.54    2.15
   6   3   2    2.84    3.52
  -6   3  -2    2.79    3.95
  -7  -3  -2    1.19    2.82
   7  -3   2    1.97    2.95
   7  -3   2    8.52    4.60
   7   3   2    0.18    5.04
  -7   3  -2    3.72    2.63
  -8  -3  -2   39.39    5.71
   8  -3   2   39.40    6.45
  -8   3  -2   40.88    5.10
   8   3   2   33.28    7.07
   8  -4  -2   -0.93    7.34
  -8  -4   2    0.66    3.93
   8   4  -2    5.48    6.17
  -8   4   2    4.85    3.30
  -7  -4   2   67.40    6.24
  -7  -4   2   60.98    5.25
   7  -4  -2   43.84    7.54
   7   4  -2   64.72    7.92
  -7   4   2   68.39    4.98
  -6  -4   2    5.54    2.70
  -6  -4   2    3.18    2.62
   6  -4  -2   -0.99    4.25
  -6   4   2    0.05    2.88
  -6   4   2    1.18    2.42
   6   4  -2    5.03    3.22
  -5  -4   2   14.25    3.11
   5  -4  -2   18.58    3.23
   5  -4  -2    7.74    4.26
  -5  -4   2   14.25    2.28
  -5   4   2   14.09    2.63
   5   4  -2   13.80    2.38
  -5   4   2   15.54    2.46
  -4  -4   2    3.43    1.96
   4  -4  -2    6.05    2.85
  -4  -4   2    2.66    2.59
   4  -4  -2    3.36    1.93
   4  -4  -2    4.01    1.36
  -4   4   2    3.99    1.75
  -4   4   2    4.43    2.10
   4   4  -2    4.39    1.60
  -4   4   2    6.31    1.73
  -3  -4   2  135.01    8.23
   3  -4  -2  127.38    6.44
  -3  -4   2  127.83    8.89
   3  -4  -2  134.49    8.86
   3  -4  -2  135.20    7.80
  -3   4   2  129.53    8.39
   3   4  -2  124.62    7.89
  -3   4   2  132.75    6.47
  -3   4   2  135.82    7.81
  -3   4   2  128.56    6.75
   2  -4  -2   97.07    7.88
   2  -4  -2   89.89    5.48
   2  -4  -2   99.17    6.57
  -2  -4   2   91.53    6.07
  -2  -4   2   97.39    7.01
   2  -4  -2   90.08    4.80
   2  -4  -2  101.02    6.06
  -2   4   2   90.69    5.49
  -2   4   2   91.70    4.73
  -2   4   2   95.83    6.11
   2   4  -2   81.70    5.76
  -2   4   2   95.54    5.01
  -1  -4   2  441.69   27.53
   1  -4  -2  528.45   28.22
   1  -4  -2  491.35   35.44
   1  -4  -2  504.26   28.94
   1  -4  -2  507.07   22.62
  -1   4   2  510.77   21.91
   1   4  -2  460.85   27.51
   1   4  -2  476.86   35.78
   1   4  -2  448.21   22.44
  -1   4   2  496.10   22.65
  -1   4   2  505.55   28.91
   0  -4   2   18.55    3.00
   0  -4  -2   17.03    3.19
   0  -4  -2   17.36    2.34
   0  -4   2   13.39    1.29
   0  -4   2   10.88    1.64
   0  -4   2   13.40    1.28
   0  -4  -2   11.99    2.15
   0  -4   2   14.58    1.30
   0   4   2   14.34    3.38
   0   4   2   13.04    1.87
   0   4   2   13.88    1.84
   0   4  -2    8.52    1.70
   0   4   2   10.86    1.17
   0   4  -2    8.39    1.22
   0   4  -2   13.64    2.88
   1  -4   2   76.99    5.00
   1  -4   2   64.36    4.82
   1  -4   2   74.93    3.90
   1  -4   2   81.12    6.45
  -1  -4  -2   87.50    5.01
   1  -4   2   76.09    3.74
   1   4   2   76.35    5.33
  -1   4  -2   92.36    7.50
  -1   4  -2   68.95    3.81
   1   4   2   79.61    4.73
   1   4   2   68.07    7.16
  -1   4  -2   72.12    3.96
  -2  -4  -2    4.55    1.50
  -2  -4  -2    2.00    0.81
   2  -4   2    0.76    1.98
   2  -4   2    3.41    1.43
   2  -4   2    1.89    1.00
   2  -4   2    2.97    0.97
  -2   4  -2    3.09    1.42
  -2   4  -2    3.13    1.25
   2   4   2    5.64    1.93
   2   4   2    3.20    1.22
  -2   4  -2    2.19    1.34
   3  -4   2    2.75    0.96
   3  -4   2    2.77    1.73
   3  -4   2    3.03    0.89
  -3  -4  -2    4.23    1.13
   3  -4   2    3.66    1.31
   3   4   2    3.04    1.27
  -3   4  -2    2.79    1.36
  -3   4  -2    3.44    1.43
   3   4   2    4.36    1.80
  -3   4  -2    0.97    1.57
   4  -4   2    2.59    1.97
  -4  -4  -2    0.40    3.08
   4  -4   2    1.20    2.35
  -4  -4  -2    0.77    1.51
  -4   4  -2    1.27    1.63
  -4   4  -2    1.73    1.64
   4   4   2    2.32    2.21
  -4   4  -2    2.65    1.84
  -5  -4  -2  110.09   12.13
  -5  -4  -2  154.18    7.37
   5  -4   2  139.48   10.38
  -5   4  -2  140.89    9.62
  -5   4  -2  155.61    7.44
   5   4   2  139.02    9.77
   6  -4   2    4.43    4.22
  -6  -4  -2   10.56    2.60
  -6   4  -2    8.93    2.11
   6   4   2   13.30    4.02
  -7  -4  -2   83.47    6.17
   7  -4   2   82.56    7.41
   7  -4   2   70.82    9.08
  -7   4  -2   92.08    5.70
   7   4   2   90.75    9.74
  -8  -4  -2    6.64    4.21
   8  -4   2    3.06    4.27
   8   4   2    2.19    7.41
  -8   4  -2    7.03    2.82
  -8  -5   2   -1.33    4.14
   8  -5  -2   -3.98    8.04
  -8   5   2   -4.89    2.98
   8   5  -2    1.20    7.41
  -7  -5   2   13.22    3.49
  -7  -5   2   14.01    3.29
   7  -5  -2   15.39    6.79
   7   5  -2   21.37    5.63
  -7   5   2   19.95    3.18
  -6  -5   2   31.22    4.01
   6  -5  -2   31.65    5.90
  -6  -5   2   32.50    4.53
  -6   5   2   35.86    4.33
   6   5  -2   38.72    6.18
  -6   5   2   27.87    3.77
   5  -5  -2   84.71    8.85
  -5  -5   2   81.85    4.94
  -5  -5   2   78.72    6.30
   5  -5  -2   87.58    6.49
  -5   5   2   85.94    5.73
  -5   5   2   79.54    5.09
   5   5  -2   81.39    5.38
  -4  -5   2   89.02    6.15
   4  -5  -2  102.10    6.03
  -4  -5   2   74.20    6.84
   4  -5  -2   86.63    7.30
  -4   5   2   93.64    5.26
  -4   5   2   75.95    6.87
  -4   5   2   95.33    5.01
   4   5  -2   80.57    4.86
  -3  -5   2  111.62    7.53
   3  -5  -2  115.00    6.01
  -3  -5   2  118.00    8.01
   3  -5  -2  125.10    7.21
   3  -5  -2  124.03    8.32
   3  -5  -2  133.11    7.59
   3  -5  -2  119.51    9.83
  -3   5   2  118.11    6.39
  -3   5   2  122.03    7.82
  -3   5   2  117.60    6.04
   3   5  -2  119.65    7.38
   2  -5  -2   53.48    3.53
   2  -5  -2   58.47    4.66
   2  -5  -2   60.49    3.48
  -2  -5   2   63.03    4.37
   2  -5  -2   57.93    4.18
   2  -5  -2   50.18    5.65
   2   5  -2   65.27    4.15
  -2   5   2   59.61    4.25
  -2   5   2   60.05    3.42
  -2   5   2   60.10    3.93
   1  -5  -2    9.69    2.15
   1  -5  -2   12.71    2.80
   1  -5  -2   12.70    1.96
  -1  -5   2   14.18    2.28
   1   5  -2   12.97    2.05
   1   5  -2   10.53    1.16
  -1   5   2   10.60    1.61
  -1   5   2   13.16    3.45
  -1   5   2   12.60    1.49
  -1   5   2   10.62    2.02
   1   5  -2    6.24    5.00
   0  -5  -2   74.20    5.29
   0  -5   2   75.34    3.54
   0  -5  -2   75.14    5.11
   0  -5   2   75.23    4.44
   0  -5  -2   52.71    7.44
   0  -5   2   72.77    3.68
   0  -5   2   70.57    4.27
   0  -5   2   61.15    7.26
   0   5   2   66.44    4.72
   0   5   2   66.12    6.72
   0   5   2   69.36    4.16
   0   5  -2   68.62    3.68
   0   5  -2   76.60    4.53
   1  -5   2   70.31    3.52
   1  -5   2   70.53    5.11
   1  -5   2   66.94    3.70
   1  -5   2   62.03    6.40
   1  -5   2   62.55    4.48
  -1  -5  -2   79.54    4.87
  -1   5  -2   68.67    3.65
  -1   5  -2   70.56    8.10
   1   5   2   76.88    5.37
   1   5   2   68.83    4.44
   1   5   2   55.48    7.68
  -1   5  -2   73.02    3.99
   2  -5   2  120.40    5.48
   2  -5   2  116.73    5.69
  -2  -5  -2  103.18    5.24
   2  -5   2  108.15    9.05
   2  -5   2  122.59    7.37
  -2  -5  -2   99.38    6.91
  -2  -5  -2  108.09    6.99
   2   5   2  114.61    6.95
  -2   5  -2  115.11    5.86
  -2   5  -2  120.13    5.64
   2   5   2  119.29   11.12
   2   5   2  114.91    7.32
  -3  -5  -2  252.94   12.22
   3  -5   2  259.77   19.90
   3  -5   2  268.05   12.35
  -3  -5  -2  286.61   15.72
   3  -5   2  274.91   16.39
   3  -5   2  265.09   12.72
   3   5   2  267.87   15.90
  -3   5  -2  267.59   12.45
   3   5   2  266.64   15.55
  -3   5  -2  274.90   16.20
  -3   5  -2  265.25   12.86
  -4  -5  -2   86.61    8.65
   4  -5   2  107.34    6.90
  -4  -5  -2  106.22    5.43
   4  -5   2  107.80    7.87
  -4   5  -2  106.82    5.62
  -4   5  -2   99.57    5.80
   4   5   2  106.83    7.44
  -4   5  -2  103.18    7.21
  -5  -5  -2   37.11    3.51
   5  -5   2   41.67    6.51
  -5  -5  -2   26.04    5.76
   5   5   2   46.55    5.57
  -5   5  -2   41.82    3.33
  -5   5  -2   37.89    5.06
   6  -5   2    2.35    4.27
  -6  -5  -2    2.48    2.46
   6   5   2    3.71    3.83
  -6   5  -2    4.62    2.44
  -7  -5  -2    7.89    2.89
   7  -5   2   16.09    4.00
   7  -5   2    3.51    5.28
   7   5   2    7.78    5.13
  -7   5  -2    9.20    2.84
  -8  -5  -2   22.55    4.58
   8   5   2   14.36    8.20
   8  -6  -2   27.36    9.08
  -7  -6   2    6.76    3.76
  -7  -6   2    6.44    3.12
   7  -6  -2    1.79    5.98
   7   6  -2   -3.71    4.93
  -7   6   2    1.47    3.78
  -7   6   2    0.10    3.06
  -6  -6   2   47.34    4.20
   6  -6  -2   45.57    9.15
  -6  -6   2   50.71    5.78
   6   6  -2   51.08    6.54
  -6   6   2   52.21    4.52
  -6   6   2   49.97    4.95
  -5  -6   2   -2.04    2.42
  -5  -6   2    1.98    2.17
   5  -6  -2    3.10    3.21
   5  -6  -2    2.42    3.98
   5   6  -2    2.48    2.84
  -5   6   2    1.80    1.98
   5   6  -2   -0.06    2.38
  -5   6   2    3.11    2.66
  -4  -6   2    4.25    2.22
   4  -6  -2    7.66    3.17
   4  -6  -2    4.99    2.23
   4   6  -2    7.64    2.25
  -4   6   2    5.03    1.98
  -4   6   2    2.52    1.95
   3  -6  -2    7.21    2.55
   3  -6  -2    9.92    1.46
   3  -6  -2    7.11    2.03
   3  -6  -2   10.36    2.21
  -3  -6   2    5.27    2.06
  -3  -6   2    7.75    1.88
   3  -6  -2    6.87    1.11
  -3   6   2   10.00    1.69
  -3   6   2    9.54    1.69
   3   6  -2    8.21    1.60
   3   6  -2    8.00    1.76
  -3   6   2    7.46    1.67
   2  -6  -2  239.71   18.58
   2  -6  -2  258.33   14.72
   2  -6  -2  249.71   11.83
  -2  -6   2  251.35   14.44
   2  -6  -2  244.58   15.25
   2   6  -2  243.33   14.39
  -2   6   2  248.22   15.07
  -2   6   2  253.85   11.45
  -2   6   2  246.82   11.93
   2   6  -2  247.04   20.03
   1  -6  -2   19.01    2.89
   1  -6  -2   17.25    4.48
   1  -6  -2   23.18    3.27
  -1  -6   2   28.33    2.65
   1   6  -2   28.88    2.48
   1   6  -2   21.83    5.25
  -1   6   2   25.56    1.82
  -1   6   2   26.91    2.57
   1   6  -2   24.57    1.98
  -1   6   2   19.04    4.76
  -1   6   2   24.12    2.56
   0  -6   2  433.85   31.00
   0  -6   2  423.57   24.02
   0  -6  -2  409.03   30.94
   0  -6   2  415.41   19.41
   0  -6  -2  430.13   25.08
   0  -6   2  394.37   18.84
   0  -6   2  408.91   23.63
   0  -6  -2  424.89   24.39
   0   6   2  407.98   19.54
   0   6  -2  398.80   19.43
   0   6   2  453.57   30.93
   0   6   2  436.88   23.49
   0   6  -2  387.78   23.69
   0   6  -2  422.62   31.25
   0   6   2  430.05   24.25
   1  -6   2   22.85    1.81
   1  -6   2   19.36    3.03
   1  -6   2   17.03    3.31
   1  -6   2   20.20    2.14
  -1  -6  -2   37.69    8.52
   1  -6   2   21.20    1.89
  -1  -6  -2   18.73    3.06
  -1  -6  -2   18.52    3.36
   1   6   2   20.20    2.13
  -1   6  -2   19.41    4.83
   1   6   2   18.34    4.30
   1   6   2   21.96    3.00
  -1   6  -2   20.45    1.93
  -1   6  -2   21.98    2.39
  -2  -6  -2   42.42    3.42
   2  -6   2   32.03    3.26
  -2  -6  -2   37.29    3.35
   2  -6   2   44.59    3.96
  -2  -6  -2   36.40    2.11
   2  -6   2   38.63    2.41
   2  -6   2   43.10    2.50
   2  -6   2   41.09    4.25
   2   6   2   45.54    4.29
  -2   6  -2   45.70    2.98
   2   6   2   40.68    3.29
   2   6   2   55.10    7.12
  -2   6  -2   38.44    2.71
   3  -6   2    0.50    1.85
   3  -6   2    0.21    1.04
  -3  -6  -2    0.50    1.60
  -3  -6  -2    0.24    1.12
   3  -6   2    2.46    1.89
   3  -6   2   -0.06    0.89
  -3   6  -2   -1.72    1.82
  -3   6  -2   -0.67    1.45
   3   6   2    2.18    2.15
  -3   6  -2    0.60    1.47
   3   6   2   -1.43    1.68
   4  -6   2   62.39    6.35
   4  -6   2   68.70    5.11
  -4  -6  -2   61.16    3.68
  -4  -6  -2   45.06    6.71
  -4   6  -2   65.59    4.32
  -4   6  -2   57.42    5.45
   4   6   2   52.51    5.42
  -4   6  -2   65.86    4.05
  -5  -6  -2   17.81    2.29
   5  -6   2   13.75    4.27
  -5   6  -2   15.53    3.50
   5   6   2   14.04    3.75
  -5   6  -2   18.43    2.48
  -5   6  -2   20.09    3.08
  -6  -6  -2   95.39    5.99
   6  -6   2  101.56    9.82
  -6   6  -2  107.72    6.04
   6   6   2   89.38    9.00
  -7  -6  -2   14.72    3.39
   7  -6   2   18.84    4.29
   7   6   2    6.27    6.07
  -7   6  -2   10.20    3.04
  -7  -7   2   21.01    4.28
  -7  -7   2   16.33    3.79
   7  -7  -2   14.37    7.61
  -7   7   2   21.70    3.72
   7   7  -2   17.91    5.90
  -7   7   2   17.24    3.67
  -6  -7   2    2.23    3.02
  -6  -7   2    1.50    2.72
   6  -7  -2   -3.86    5.14
  -6   7   2    1.79    2.81
   6   7  -2   -1.07    4.22
  -6   7   2    4.53    2.90
  -5  -7   2  163.11   10.93
   5  -7  -2  176.61   12.83
  -5  -7   2  165.78    8.31
   5  -7  -2  185.44   10.77
   5   7  -2  160.40   10.81
   5   7  -2  149.54    8.70
  -5   7   2  167.19    8.57
  -5   7   2  153.19    8.88
   4  -7  -2    3.25    2.21
   4  -7  -2    5.24    3.35
  -4  -7   2    1.31    2.17
   4   7  -2   -3.61    2.11
  -4   7   2    2.32    2.03
  -4   7   2    3.64    2.10
   3  -7  -2  145.83    8.84
   3  -7  -2  158.17   10.25
  -3  -7   2  143.20    9.40
   3  -7  -2  158.84    9.62
   3   7  -2  142.68    9.33
   3   7  -2  172.63   14.99
  -3   7   2  159.08    7.90
  -3   7   2  158.47    7.51
   3   7  -2  148.97    9.25
  -3   7   2  151.65    9.87
   2  -7  -2    2.70    2.38
   2  -7  -2    3.52    1.62
   2  -7  -2   -0.20    1.90
  -2  -7   2    0.07    1.43
   2  -7  -2    1.74    0.91
  -2   7   2   -1.78    1.27
   2   7  -2    7.58    5.19
   2   7  -2    1.68    1.31
  -2   7   2    2.03    1.23
   2   7  -2    1.16    1.65
  -2   7   2    0.74    1.49
  -1  -7   2    7.23    1.55
   1  -7  -2    4.42    2.51
   1  -7  -2    6.37    1.79
  -1  -7   2    6.24    1.47
   1  -7  -2    3.07    2.06
  -1   7   2    2.29    0.99
   1   7  -2    3.38    4.39
   1   7  -2    4.10    1.33
   1   7  -2    8.21    1.68
  -1   7   2    5.53    1.58
  -1   7   2   -0.78    3.24
   0  -7   2   -0.14    1.14
   0  -7   2    0.48    1.16
   0  -7  -2   -1.49    3.63
   0  -7   2   -0.66    0.94
   0  -7   2   -0.05    0.94
   0  -7   2    1.01    1.08
   0  -7  -2    0.57    1.96
   0  -7  -2    0.93    2.42
   0   7   2   -3.68    1.60
   0   7  -2   -1.60    1.42
   0   7   2    0.07    0.93
   0   7   2   -1.45    1.66
   0   7   2    0.33    3.31
   0   7  -2   -3.90    4.00
   0   7  -2    0.63    1.69
  -1  -7  -2  265.67   15.91
   1  -7   2  266.32   14.76
  -1  -7  -2  244.16   15.29
   1  -7   2  249.69   19.37
   1  -7   2  254.06   15.79
   1  -7   2  268.38   11.85
   1  -7   2  262.77   12.23
  -1   7  -2  245.63   12.26
   1   7   2  250.80   19.79
   1   7   2  264.81   15.24
  -1   7  -2  253.69   11.86
   1   7   2  271.73   14.85
  -1   7  -2  257.80   20.36
   2  -7   2    6.33    0.99
   2  -7   2    5.22    1.95
   2  -7   2    3.67    1.57
  -2  -7  -2    7.93    1.80
  -2  -7  -2    5.41    1.66
   2  -7   2    5.63    1.26
   2   7   2    6.00    2.56
  -2   7  -2    4.62    1.55
   2   7   2    4.75    4.46
   2   7   2    2.83    2.15
  -2   7  -2    5.87    1.53
  -3  -7  -2  199.88   12.77
   3  -7   2  220.99   10.15
   3  -7   2  224.29   13.66
  -3  -7  -2  205.16    9.84
  -3   7  -2  226.73   10.30
   3   7   2  220.78   18.13
   3   7   2  194.05   12.83
  -3   7  -2  226.13   10.67
   3   7   2  219.57   13.29
   4  -7   2    9.72    3.27
  -4  -7  -2    8.13    1.70
   4  -7   2    5.47    2.33
   4   7   2    6.92    3.03
  -4   7  -2   11.01    2.17
  -4   7  -2    5.90    2.99
  -4   7  -2    8.48    2.08
  -5  -7  -2   58.00    4.18
   5  -7   2   69.64    8.06
   5  -7   2   63.10    5.79
  -5   7  -2   52.40    6.98
   5   7   2   67.13    6.54
  -5   7  -2   61.77    4.49
  -5   7  -2   60.54    4.60
   6  -7   2    3.24    4.74
  -6  -7  -2   -2.02    2.39
   6   7   2    3.58    4.53
  -6   7  -2    6.07    2.59
   7  -7   2    0.66    4.27
  -7  -7  -2    2.19    3.63
   7   7   2    3.19    5.67
  -7   7  -2    4.45    3.02
  -7  -8   2   17.18    4.14
  -7  -8   2   16.44    3.90
   7  -8  -2   -0.28    7.99
  -7   8   2   17.60    4.38
  -7   8   2   18.15    4.11
  -6  -8   2   29.62    5.10
   6  -8  -2   21.09    5.99
  -6  -8   2   26.22    4.10
  -6   8   2   25.63    3.59
   6   8  -2   16.06    4.87
  -6   8   2   27.88    3.86
  -5  -8   2    3.88    2.33
   5  -8  -2    0.47    4.74
  -5  -8   2    3.18    2.73
  -5   8   2    3.33    2.64
  -5   8   2    1.08    2.84
   5   8  -2    2.45    3.10
  -4  -8   2   23.42    4.47
   4  -8  -2   23.82    3.12
   4  -8  -2   26.34    5.70
  -4   8   2   25.60    3.52
  -4   8   2   24.34    3.58
   4   8  -2   20.81    9.97
   4   8  -2   23.99    3.70
  -3  -8   2   16.95    2.76
   3  -8  -2   23.00    3.81
   3  -8  -2   15.96    2.76
   3   8  -2   26.47    6.70
  -3   8   2   16.32    2.58
  -3   8   2   16.91    2.48
   2  -8  -2  107.61    7.79
  -2  -8   2  104.25    6.99
   2  -8  -2  111.12    7.53
  -2   8   2  109.79    5.96
  -2   8   2  102.47    7.12
   2   8  -2  115.83   11.61
   2   8  -2  110.39    5.63
   2   8  -2  108.18    7.23
  -2   8   2  110.88    5.44
   1  -8  -2   70.97    6.48
   1  -8  -2   65.14    5.38
  -1  -8   2   58.22    3.50
   1  -8  -2   67.45    5.00
  -1  -8   2   55.96    4.31
  -1   8   2   71.72    6.99
  -1   8   2   63.13    3.35
   1   8  -2   61.47    3.76
   1   8  -2   54.42    4.67
   1   8  -2   65.80    8.30
  -1   8   2   65.03    4.20
   0  -8   2  197.35    8.83
   0  -8  -2  197.72   11.91
   0  -8   2  169.06   14.78
   0  -8   2  194.43   11.00
   0  -8  -2  191.01   12.01
   0  -8  -2  178.62   14.90
   0   8   2  197.44   15.09
   0   8  -2  194.09    9.29
   0   8   2  191.56    9.42
   0   8  -2  180.25   15.69
   0   8  -2  195.21   11.29
   0   8   2  185.92   11.38
   1  -8   2   34.93    4.05
   1  -8   2   37.95    2.69
  -1  -8  -2   32.96    4.04
   1  -8   2   38.30    2.59
  -1  -8  -2   40.11    4.19
   1  -8   2   34.72    2.94
  -1   8  -2   31.95    2.73
  -1   8  -2   36.83    3.13
   1   8   2   44.42    3.61
   1   8   2   36.06    6.34
  -1   8  -2   39.66    7.58
   1   8   2   34.21    3.43
   2  -8   2   47.54    5.14
   2  -8   2   55.76    4.81
  -2  -8  -2   52.11    4.15
   2  -8   2   50.59    3.14
   2  -8   2   49.76    3.45
   2  -8   2   45.07    3.95
  -2  -8  -2   47.51    4.15
   2   8   2   52.49    8.04
  -2   8  -2   54.70    3.89
   2   8   2   49.71    4.42
  -2   8  -2   49.50    3.26
   2   8   2   54.07    4.91
   3  -8   2   -0.32    2.49
   3  -8   2    3.49    2.02
  -3  -8  -2    6.33    2.28
  -3  -8  -2    4.27    1.11
   3  -8   2    3.90    1.97
   3   8   2    4.45    3.38
   3   8   2   -0.28    3.06
   3   8   2    9.21    5.53
  -3   8  -2    6.61    2.05
  -3   8  -2    8.46    2.34
  -4  -8  -2   51.62    3.45
   4  -8   2   64.99    5.28
   4  -8   2   58.67    6.19
   4   8   2   51.32    6.26
  -4   8  -2   65.42    4.26
  -4   8  -2   60.33    4.87
   4   8   2   46.07   11.40
   5  -8   2   27.23    5.48
   5  -8   2   23.42    5.00
  -5  -8  -2   24.54    3.32
   5   8   2   28.77    6.20
  -5   8  -2   29.51    3.70
  -5   8  -2   28.76    3.85
   6  -8   2   48.76    9.37
  -6  -8  -2   59.32    4.79
  -6   8  -2   62.82    5.12
   6   8   2   47.77    7.70
   7  -8   2   28.79    5.50
   7   8   2    6.52    6.84
  -7   8  -2   18.16    3.69
  -7  -9   2    7.74    4.80
   7  -9  -2   -6.08    7.91
  -7   9   2   -1.24    4.14
  -7   9   2   -7.97    3.64
  -6  -9   2   37.10    4.53
  -6  -9   2   39.66    5.87
   6  -9  -2   33.97    7.09
  -6   9   2   47.98    5.69
  -6   9   2   54.78    5.25
   5  -9  -2   18.74    5.27
  -5  -9   2   24.34    3.66
  -5  -9   2   24.74    3.51
   5   9  -2    0.52   10.00
  -5   9   2   25.29    4.04
  -5   9   2   27.86    4.11
   4  -9  -2  105.90    6.43
  -4  -9   2  118.29    7.80
   4   9  -2  101.23   12.82
  -4   9   2  118.81    6.23
   4   9  -2   82.17    7.45
   4   9  -2   83.86    7.13
  -4   9   2  115.48    6.64
  -3  -9   2   77.91    5.99
   3  -9  -2   70.94    6.75
   3   9  -2   67.44    4.59
   3   9  -2   79.41   11.88
  -3   9   2   78.28    5.28
  -3   9   2   82.92    4.66
   2  -9  -2   46.66    5.19
   2  -9  -2   46.67    5.53
  -2  -9   2   38.32    4.13
  -2   9   2   49.03    3.20
   2   9  -2   58.22    9.41
   2   9  -2   44.06    4.96
  -2   9   2   43.71    3.75
   2   9  -2   51.88    3.51
   1  -9  -2    5.85    2.89
   1  -9  -2    4.67    2.48
  -1  -9   2    2.83    1.58
  -1  -9   2    3.26    1.66
  -1   9   2    5.70    2.15
  -1   9   2    1.32    4.18
   1   9  -2    4.08    1.77
   1   9  -2    1.17    4.92
   1   9  -2    3.60    2.16
  -1   9   2    1.56    1.25
   0  -9   2   47.93    3.61
   0  -9  -2   45.08    5.73
   0  -9  -2   51.04    5.96
   0  -9   2   47.63    3.14
   0  -9  -2   51.44    4.95
   0   9  -2   46.39    4.64
   0   9  -2   46.75    3.52
   0   9   2   44.13    3.98
   0   9   2   55.85    7.43
   0   9  -2   50.04    8.26
  -1  -9  -2   49.76    5.04
   1  -9   2   55.52    3.49
   1  -9   2   50.23    5.04
   1  -9   2   51.10    3.33
  -1  -9  -2   38.56    4.51
   1  -9   2   53.89    3.64
   1  -9   2   45.51    4.29
  -1   9  -2   42.21    7.97
   1   9   2   44.69    4.19
   1   9   2   53.10    4.15
   1   9   2   47.98    7.36
  -1   9  -2   50.92    3.83
   1   9   2   51.05    4.19
   2  -9   2  163.41   10.93
  -2  -9  -2  155.30   10.06
   2  -9   2  167.61    8.14
   2  -9   2  162.34    9.66
   2   9   2  167.32   10.35
   2   9   2  176.49   14.74
  -2   9  -2  171.76    8.43
   2   9   2  152.51   10.18
  -2   9  -2  160.81   15.23
  -2   9  -2  159.84    8.00
   3  -9   2   28.09    3.70
   3  -9   2   22.27    3.92
  -3   9  -2   32.98    4.08
   3   9   2   15.88    4.42
   3   9   2   21.12    7.26
  -3   9  -2   28.18    3.14
   3   9   2   28.13    5.18
   4  -9   2   59.37    5.37
   4  -9   2   64.27    7.08
  -4  -9  -2   55.44    3.47
   4   9   2   53.18    7.36
  -4   9  -2   58.24    4.71
  -4   9  -2   60.79    4.43
   4   9   2   66.56   11.60
  -5  -9  -2   12.22    2.34
   5  -9   2   11.84    5.24
  -5   9  -2   14.44    2.69
  -5   9  -2   16.76    2.95
   5   9   2    2.41    8.60
   5   9   2    5.03    4.78
   6  -9   2   -0.98    6.16
  -6   9  -2    1.20    2.76
  -6   9  -2    4.95    2.62
   6   9   2    4.36    6.01
   6   9   2  -15.71   10.75
   7  -9   2   -6.32    5.56
  -7   9  -2    3.19    3.95
  -6 -10   2    4.22    4.37
   6 -10  -2    4.29    6.84
  -6  10   2   -1.97    3.71
   6  10  -2  -16.16    9.10
  -6  10   2    4.04    3.10
  -5 -10   2    0.75    2.25
   5 -10  -2    0.91    5.08
  -5 -10   2    2.04    3.12
  -5  10   2   -1.56    2.76
  -5  10   2    1.37    2.95
   5  10  -2   -9.60    8.31
  -4 -10   2    1.38    2.76
  -4 -10   2   -0.24    1.85
   4 -10  -2    4.52    3.81
  -4  10   2    1.65    2.72
   4  10  -2   -0.46    7.90
  -4  10   2    2.18    2.47
  -3 -10   2   48.44    5.01
   3 -10  -2   48.53    5.94
   3  10  -2   44.26    3.90
  -3  10   2   52.08    3.92
  -3  10   2   51.34    4.62
   3  10  -2   51.23    9.89
   2 -10  -2    0.02    2.85
  -2 -10   2    2.72    2.06
  -2 -10   2    0.38    2.14
   2 -10  -2    2.74    3.27
   2  10  -2   -2.34    6.43
   2  10  -2    3.50    3.21
  -2  10   2    2.57    2.47
   2  10  -2    3.40    2.17
  -2  10   2   -0.40    1.69
  -1 -10   2  215.68   12.77
   1 -10  -2  221.42   14.07
   1 -10  -2  217.71   13.74
  -1 -10   2  218.02   10.10
  -1  10   2  194.58    9.99
  -1  10   2  223.32   10.84
  -1  10   2  234.60   17.60
   1  10  -2  206.74   10.58
   1  10  -2  223.67   18.40
   0 -10   2   -0.35    2.87
   0 -10  -2   -5.86    4.45
   0 -10   2    0.17    1.70
   0 -10  -2   -0.23    2.59
   0 -10   2    0.63    1.64
   0  10   2   -1.40    1.69
   0  10  -2    1.32    2.00
   0  10  -2   -1.77    5.36
   0  10  -2   -4.33    2.99
   0  10   2   -2.03    4.90
   0  10   2    1.79    2.14
   1 -10   2  112.42    5.90
  -1 -10  -2  124.00    8.47
  -1 -10  -2  108.15    7.72
   1 -10   2  112.12    6.44
   1 -10   2  116.01    6.95
   1 -10   2  111.81    8.51
   1 -10   2  120.50    7.51
  -1  10  -2  115.23    6.48
  -1  10  -2  116.19   12.63
   1  10   2  115.40    6.51
   1  10   2  104.18    7.51
   1  10   2  114.39   11.44
   1  10   2  112.49    7.51
   2 -10   2   -0.38    2.92
  -2 -10  -2    1.85    3.01
  -2 -10  -2   -0.13    2.43
   2 -10   2   -1.08    3.06
   2 -10   2    2.40    2.35
   2 -10   2    0.73    1.71
   2  10   2    2.16    2.81
  -2  10  -2    3.77    2.45
   2  10   2    1.41    5.78
  -2  10  -2   -4.43    5.52
   2  10   2   -0.15    3.34
  -2  10  -2   -0.97    1.96
   3 -10   2    6.02    3.49
   3 -10   2   11.03    2.24
   3 -10   2    8.37    2.41
   3  10   2    9.23    4.05
  -3  10  -2    7.03    2.80
   3  10   2    7.90    7.20
  -3  10  -2    7.68    2.52
   4 -10   2    1.82    4.29
   4 -10   2   -1.84    2.86
  -4  10  -2    2.57    2.54
   4  10   2    0.53    4.80
   4  10   2    5.32    8.13
  -4  10  -2    4.58    2.99
   5 -10   2   79.17   10.18
  -5  10  -2   90.28    5.72
   5  10   2   55.30    9.39
   5  10   2   58.72   13.39
  -5  10  -2   84.57    5.73
   6 -10   2    0.97    7.50
   6  10   2    1.91   10.43
  -6  10  -2   -2.41    3.49
  -6  10  -2    2.22    2.77
  -6 -11   2   31.44    5.47
   6 -11  -2   11.15    7.76
  -6  11   2   45.32    5.99
  -6  11   2   23.86    4.58
   6  11  -2   20.37    8.89
   5 -11  -2   22.55    6.07
  -5 -11   2   20.04    3.98
  -5  11   2   21.06    3.43
  -5  11   2   20.71    3.67
   5  11  -2   19.53    9.54
  -4 -11   2   77.33    6.81
  -4 -11   2   71.55    4.60
   4 -11  -2   68.31    8.05
   4  11  -2   74.02   12.98
   4  11  -2   70.42    5.43
  -4  11   2   80.91    5.44
  -4  11   2   71.68    5.45
  -3 -11   2   11.49    3.01
   3 -11  -2    8.61    3.81
  -3  11   2   12.89    2.49
  -3  11   2   23.80    3.67
   3  11  -2   24.14    8.20
   3  11  -2   18.10    2.75
   2 -11  -2   22.69    4.85
   2 -11  -2   23.79    4.64
  -2 -11   2   30.61    3.90
  -2 -11   2   24.02    3.07
  -2  11   2   29.91    3.02
   2  11  -2   23.12    7.38
  -2  11   2   28.45    4.15
   2  11  -2   18.77    4.22
   2  11  -2   29.26    3.61
   1 -11  -2   -0.32    2.97
  -1 -11   2   -1.14    2.00
  -1 -11   2   -0.62    1.78
   1 -11  -2   -1.13    4.34
  -1  11   2   -2.53    5.25
  -1  11   2   -1.01    1.59
   1  11  -2   -1.12    5.97
  -1  11   2   -3.80    2.67
   1  11  -2   -2.49    3.34
   1  11  -2    0.32    2.38
   0 -11   2   36.65    3.20
   0 -11   2   27.01    5.33
   0 -11   2   30.41    3.31
   0 -11  -2   31.99    4.99
   0 -11  -2   18.25    5.90
   0  11   2   35.46    8.32
   0  11  -2   29.24    3.72
   0  11   2   27.49    4.22
   0  11  -2   24.42    6.41
   0  11  -2   27.37    4.58
  -1 -11  -2   17.06    3.10
   1 -11   2   18.56    2.60
   1 -11   2   19.41    2.66
   1 -11   2   21.41    3.35
  -1 -11  -2   17.79    3.62
   1 -11   2   19.71    3.80
   1  11   2   19.40    6.08
  -1  11  -2   22.01    7.29
  -1  11  -2   23.24    3.88
   1  11   2   15.93    3.26
   1  11   2   10.52    3.12
   2 -11   2   66.07    6.80
  -2 -11  -2   74.38    6.51
   2 -11   2   77.29    4.79
   2 -11   2   73.75    7.00
   2 -11   2   74.03    5.51
  -2  11  -2   66.05    4.58
  -2  11  -2   60.51   10.48
   2  11   2   69.69   10.12
  -2  11  -2   75.84    5.40
   2  11   2   70.28    5.84
   2  11   2   57.38    5.49
   2  11   2   63.92    6.89
   3 -11   2   15.72    2.44
   3 -11   2   18.32    4.14
   3  11   2   28.79    8.12
  -3  11  -2   18.06    2.95
   3  11   2   17.56    3.89
  -3  11  -2   19.81    3.45
   4 -11   2   62.79    8.43
   4 -11   2   60.12    5.61
  -4  11  -2   59.49    5.23
  -4  11  -2   53.46    5.07
   4  11   2   88.41   12.50
   5 -11   2    2.06    6.32
  -5  11  -2    0.32    3.27
   5  11   2   -5.32   10.10
  -5  11  -2    6.84    2.99
   6 -11   2    4.34    5.48
   6 -11   2    7.15    8.06
   6  11   2   10.77   11.58
  -6  11  -2   -3.89    3.43
  -6  11  -2    0.03    3.97
   6 -12  -2   10.66    9.37
  -6 -12   2    5.96    4.91
  -6  12   2   11.66    4.73
  -5 -12   2    4.32    4.38
   5 -12  -2    0.65    6.13
   5  12  -2    8.98    9.84
  -5  12   2    5.15    4.09
  -5  12   2   10.82    3.33
   4 -12  -2    1.55    4.53
  -4 -12   2    5.54    3.62
  -4  12   2    6.00    3.22
  -4  12   2    3.06    3.34
   4  12  -2   16.70    8.76
   3 -12  -2   15.08    4.20
  -3 -12   2   21.36    3.75
   3  12  -2   19.46    3.16
  -3  12   2   20.61    2.98
  -3  12   2   17.68    3.10
   3  12  -2   14.94    8.56
   2 -12  -2   67.51    6.56
  -2 -12   2   70.39    5.97
   2  12  -2   72.89    5.31
   2  12  -2   64.12    9.88
  -2  12   2   67.01    5.17
  -2  12   2   63.42    4.38
  -1 -12   2   43.75    3.42
   1 -12  -2   52.45    6.03
  -1 -12   2   49.33    4.37
   1 -12  -2   33.09    6.18
   1  12  -2   52.85    4.71
   1  12  -2   42.86    8.54
  -1  12   2   51.03    4.94
  -1  12   2   42.39    7.94
   1  12  -2   33.32    6.86
   0 -12   2  106.47    8.59
   0 -12   2   94.98    5.53
   0 -12   2   90.31    6.48
   0 -12  -2   89.45    7.71
   0  12  -2  107.02   12.55
   0  12   2  118.15   11.88
   0  12   2   99.00    6.70
   0  12  -2  108.69    6.59
  -1 -12  -2   40.82    5.90
   1 -12   2   39.49    4.24
   1 -12   2   39.82    3.33
   1 -12   2   31.40    3.78
   1 -12   2   30.02    6.10
   1 -12   2   29.50    5.45
  -1 -12  -2   26.47    4.72
   1  12   2   37.01    7.76
   1  12   2   37.52    4.54
  -1  12  -2   37.98    4.56
   1  12   2   26.77    4.99
  -1  12  -2   37.88   10.14
  -2 -12  -2   17.85    4.02
   2 -12   2   17.75    4.27
   2 -12   2    9.97    2.06
   2 -12   2   15.70    4.38
  -2  12  -2   15.69    8.43
   2  12   2   13.98    3.89
  -2  12  -2   16.70    2.93
  -2  12  -2   12.43    2.58
   2  12   2   22.16    7.14
  -3 -12  -2    5.49    3.57
   3 -12   2    0.48    4.15
  -3  12  -2    6.00    3.43
   3  12   2    4.67    8.25
  -3  12  -2   -0.31    2.49
   4 -12   2   20.29    5.86
   4  12   2   41.51   10.18
  -4  12  -2   16.59    3.71
  -4  12  -2   18.67    3.83
   5 -12   2   20.77    7.71
  -5  12  -2   34.16    5.20
  -5  12  -2   35.13    5.53
   5  12   2   63.21   14.49
   6 -12   2   44.57    9.30
  -6  12  -2   36.29    5.83
   6  12   2   37.95   14.44
   5 -13  -2   37.99    8.09
  -5 -13   2   58.09    8.08
   5  13  -2   84.62   13.34
  -5  13   2   54.36    5.97
  -5  13   2   56.39    6.87
  -4 -13   2    3.27    4.02
   4 -13  -2   -3.01    4.95
   4  13  -2   11.00    8.65
  -4  13   2    2.09    3.26
  -4  13   2    4.57    3.64
   3 -13  -2   60.23    8.07
  -3 -13   2   68.98    6.70
  -3  13   2   78.65    6.26
   3  13  -2   68.36    5.91
  -3  13   2   74.53    5.36
   3  13  -2   84.28   12.49
  -2 -13   2    4.23    2.74
   2 -13  -2    1.73    3.69
   2  13  -2    1.50    3.05
  -2  13   2    2.15    2.97
  -2  13   2    1.58    2.28
   2  13  -2    1.47    6.35
  -1 -13   2   -2.77    4.05
  -1 -13   2    1.96    2.40
   1 -13  -2    1.87    3.25
  -1  13   2    1.69    5.50
   1  13  -2    3.75    7.23
  -1  13   2    5.35    3.50
   1  13  -2    4.81    3.18
   0 -13   2    3.22    2.20
   0 -13   2    5.29    4.07
   0  13  -2    3.12    7.57
   0  13   2   -0.52    6.68
   0  13   2   -3.63    3.56
   0  13  -2    2.22    2.98
  -1 -13  -2   69.83    7.23
   1 -13   2   58.51    5.32
   1 -13   2   58.39    7.52
   1 -13   2   63.36    4.81
  -1  13  -2   73.37   11.43
   1  13   2   68.07    9.81
   1  13   2   68.91    6.19
  -1  13  -2   65.97    5.82
  -2 -13  -2   13.02    4.28
   2 -13   2   12.79    3.53
   2 -13   2   11.04    4.71
  -2  13  -2   -1.85    8.47
   2  13   2    7.34    4.61
  -2  13  -2   14.83    3.77
   2  13   2   15.60    7.80
  -3 -13  -2  114.52   10.01
   3 -13   2  100.48   10.88
   3  13   2  127.09   14.39
  -3  13  -2  103.69    7.13
   3  13   2  110.48    8.27
  -3  13  -2  113.40    7.96
   4 -13   2   -1.58    5.55
  -4 -13  -2   10.68    5.33
  -4  13  -2    2.52    3.53
  -4  13  -2    1.66    3.86
   4  13   2   17.28    9.44
   5 -13   2   23.85    8.57
   5 -13   2   27.43    6.14
  -5  13  -2   20.98    4.53
  -5  13  -2   22.70    4.13
   5  13   2   41.72   11.47
   4 -14  -2    6.50    5.78
  -4 -14   2    4.47    4.58
  -4  14   2    8.72    3.61
   4  14  -2   19.78   10.81
  -3 -14   2    0.11    3.66
   3 -14  -2   -2.60    4.79
   3  14  -2    8.39    8.27
  -3  14   2    1.71    4.00
   2 -14  -2   55.64    7.95
  -2 -14   2   65.36    6.52
   2  14  -2   78.76   10.54
  -2  14   2   76.22    6.64
   2  14  -2   63.62    6.04
   1 -14  -2   10.86    3.80
  -1 -14   2    5.95    3.07
  -1 -14   2   14.38    4.00
   1  14  -2   13.55    7.81
   1  14  -2    5.68    3.39
  -1  14   2    3.42    3.94
  -1  14   2   15.68    6.26
   0 -14  -2   84.33    7.78
   0 -14   2   78.16    7.93
   0  14   2   78.96   11.81
   0  14   2   77.29    6.90
   0  14  -2   79.42   12.31
   0  14  -2   78.98    6.44
   1 -14   2    4.17    4.19
  -1 -14  -2   -3.15    3.36
   1  14   2    6.60    4.28
  -1  14  -2   13.94    7.91
   1  14   2   22.22    8.07
  -1  14  -2    1.41    3.81
   2 -14   2    3.73    5.30
  -2 -14  -2   10.97    4.51
   2  14   2   19.80    8.74
   2  14   2   12.09    4.77
  -2  14  -2    8.84    4.15
  -3 -14  -2    0.15    5.09
   3 -14   2    0.92    5.55
   3 -14   2   -1.70    4.92
  -3  14  -2    5.16    3.61
  -3  14  -2    2.05    3.83
   3  14   2    1.92    4.95
   4 -14   2   21.30    6.82
  -4 -14  -2   18.93    5.48
   4 -14   2   15.77    5.69
  -4  14  -2   17.20    4.63
   4  14   2    9.48    5.96
   4  14   2   26.83   12.48
  -4  14  -2   16.62    4.38
   4 -15  -2    6.14    6.68
  -4 -15   2   19.21    5.49
  -3 -15   2   17.23    4.74
   3 -15  -2   16.48    5.99
  -3  15   2   22.65    4.49
   3  15  -2   42.79   11.23
   2 -15  -2    7.02    5.25
  -2 -15   2   16.13    4.63
  -2  15   2   23.04    4.29
   2  15  -2   30.21    9.64
   1 -15  -2    0.94    3.85
  -1 -15   2    0.83    4.96
  -1  15   2   16.42    7.00
  -1  15   2   -2.68    4.45
   1  15  -2    7.21    4.35
   1  15  -2    9.95    7.69
   0 -15   2   16.83    4.87
   0 -15  -2   16.97    4.21
   0  15  -2   20.16    9.16
   0  15  -2   18.21    4.82
   0  15   2   17.32    4.78
   0  15   2   30.47    8.89
   1 -15   2   30.58    6.29
  -1 -15  -2   36.19    6.23
   1  15   2   47.14   12.01
   1  15   2   48.02    6.85
  -1  15  -2   39.14    6.44
  -1  15  -2   40.59    8.61
  -2 -15  -2   25.80    5.66
   2 -15   2   19.52    5.66
   2  15   2   29.63    9.21
   2  15   2   25.34    5.46
  -2  15  -2   27.10    5.06
   3 -15   2   37.23    7.29
  -3 -15  -2   31.50    5.91
   3  15   2   42.26    7.08
  -3  15  -2   36.29    5.14
   4 -15   2    4.58    7.87
  -4 -15  -2   17.97    7.09
  -4  15  -2   12.15    5.45
   4  15   2   47.07   13.71
   3 -16  -2   14.33    6.18
   2 -16  -2    9.34    5.76
  -2 -16   2   10.05    5.65
  -2  16   2   11.87    4.83
   2  16  -2    8.41   10.33
   1 -16  -2   50.58    7.69
  -1 -16   2   60.86    8.14
   1  16  -2   79.79   13.68
  -1  16   2   51.22    7.87
  -1  16   2   85.16   13.31
   1  16  -2   47.06    7.66
   0 -16   2    6.83    6.15
   0 -16  -2   13.66    5.22
   0  16  -2   -1.51   10.00
   0  16   2   32.11    9.58
   0  16   2    6.60    5.36
   0  16  -2   11.38    5.44
   1 -16   2   20.95    6.78
  -1 -16  -2   14.58    5.46
   1  16   2   29.97    5.84
  -1  16  -2   22.02    5.39
  -1  16  -2   52.33   12.96
   1  16   2   26.24   10.59
  -2 -16  -2   -1.29    5.52
   2 -16   2    4.13    6.95
  -2  16  -2    8.76    5.53
   2  16   2    7.61    6.66
   2  16   2   12.95   11.70
   0  17  -2   15.83    6.55
   0  17   2    9.35    5.61
  -8   0   3   -3.47    2.98
  -7   0   3   57.89    6.90
  -7   0   3   53.20    4.38
  -6   0   3    3.19    2.81
   6   0  -3   -1.62    4.09
  -6   0   3    7.80    2.45
  -5   0   3    0.66    2.26
   5   0  -3    5.45    3.51
  -5   0   3    4.44    2.07
   5   0  -3    4.48    2.51
  -4   0   3   -0.74    1.56
   4   0  -3    0.01    1.59
   4   0  -3    2.78    2.67
  -4   0   3    1.09    1.95
   4   0  -3   -1.42    1.48
   3   0  -3  271.59   15.97
   3   0  -3  236.99   11.88
  -3   0   3  258.65   14.68
   3   0  -3  267.71   14.65
  -3   0   3  248.68   15.53
  -3   0   3  238.75   11.93
  -2   0   3    0.14    0.76
  -2   0   3   -0.22    1.18
   2   0  -3    0.00    1.20
  -2   0   3    3.55    1.82
   2   0  -3   -0.60    1.06
   2   0  -3   -0.44    0.74
   2   0  -3    0.92    1.78
  -1   0   3  366.38   20.56
   1   0  -3  330.44   20.02
  -1   0   3  337.84   16.36
   1   0  -3  369.75   21.16
  -1   0   3  320.80   20.02
  -1   0   3  373.79   21.13
   1   0  -3  383.35   20.57
   0   0   3    0.46    1.37
   0   0   3    2.69    1.93
   0   0  -3    2.61    2.17
  -1   0  -3  339.71   15.97
  -1   0  -3  364.46   20.54
   1   0   3  333.46   15.95
   1   0   3  381.03   20.59
   2   0   3    0.35    0.88
   2   0   3    0.05    1.61
  -2   0  -3   -0.31    1.02
   3   0   3   16.11    3.00
  -3   0  -3   17.22    2.07
   3   0   3   16.00    2.12
   3   0   3   18.56    2.14
   3   0   3   17.74    1.74
  -3   0  -3   18.13    2.46
  -4   0  -3    0.16    1.45
   4   0   3   -2.15    1.29
   4   0   3    0.01    1.97
  -4   0  -3   -1.11    1.85
   4   0   3   -0.56    1.06
   4   0   3   -0.33    1.05
   5   0   3  119.78    8.68
  -5   0  -3  121.37    8.97
  -5   0  -3  134.02    6.65
   6   0   3    1.13    3.02
  -6   0  -3    1.38    2.32
  -6   0  -3   -1.95    3.93
  -7   0  -3   80.60    5.47
   7   0   3   79.36    7.57
   8   0   3    1.36    5.15
  -8   0  -3    5.79    3.57
  -8  -1   3   -0.84    3.70
   8  -1  -3   -0.58    7.20
  -8   1   3    0.11    2.86
  -7  -1   3    7.06    2.66
   7  -1  -3    3.58    5.53
  -7  -1   3    7.25    3.57
  -7   1   3    3.99    2.51
  -7   1   3    8.78    4.20
   6  -1  -3  137.48   11.44
  -6  -1   3  145.93    9.76
  -6  -1   3  148.46    7.83
   6   1  -3  150.08    8.75
  -6   1   3  149.64    7.63
   6   1  -3  141.09   11.73
  -6   1   3  151.91    9.78
  -5  -1   3   40.03    3.46
  -5  -1   3   38.56    4.23
   5  -1  -3   34.11    6.26
   5  -1  -3   32.72    4.00
   5   1  -3   32.53    6.48
   5   1  -3   40.24    3.67
  -5   1   3   36.10    4.14
  -5   1   3   35.44    3.49
  -5   1   3   44.40    3.74
  -4  -1   3  117.87    9.13
   4  -1  -3  134.40    9.54
   4  -1  -3  139.40    8.24
   4  -1  -3  146.52    6.97
  -4  -1   3  129.85    8.38
  -4   1   3  141.50    8.36
  -4   1   3  134.53    6.90
  -4   1   3  122.84    8.98
   4   1  -3  140.18    8.17
   4   1  -3  134.00    6.81
   4   1  -3  135.94    9.47
  -3  -1   3   37.65    3.40
   3  -1  -3   38.47    2.55
  -3  -1   3   43.15    4.24
   3  -1  -3   39.25    3.19
   3  -1  -3   36.48    2.92
   3  -1  -3   50.18    5.20
  -3  -1   3   36.66    2.48
   3   1  -3   36.93    2.94
  -3   1   3   36.39    2.77
  -3   1   3   39.98    3.87
  -3   1   3   38.73    3.50
   3   1  -3   35.79    2.42
  -2  -1   3   19.39    1.54
   2  -1  -3   23.26    2.12
   2  -1  -3   23.28    1.77
   2  -1  -3   25.08    2.57
  -2  -1   3   24.31    2.51
   2  -1  -3   35.03    3.86
  -2   1   3   25.18    2.34
   2   1  -3   31.44    3.51
   2   1  -3   22.72    2.17
   2   1  -3   22.23    1.56
  -2   1   3   27.97    2.87
  -2   1   3   25.86    1.89
   2   1  -3   27.73    2.59
  -1  -1   3   16.76    1.97
   1  -1  -3   13.97    2.24
   1  -1  -3   16.66    1.58
  -1  -1   3   13.46    0.98
  -1  -1   3   16.83    2.55
  -1  -1   3   11.63    1.77
   1  -1  -3   17.62    2.45
  -1   1   3   13.57    1.42
   1   1  -3   13.81    1.67
  -1   1   3   12.84    1.98
   1   1  -3   21.06    3.12
  -1   1   3   14.92    2.47
  -1   1   3   14.36    1.58
   1   1  -3   13.31    1.83
   0  -1  -3  247.49   14.41
   0  -1   3  240.04   14.29
   0  -1   3  259.35   14.45
   0  -1  -3  245.11   14.46
   0  -1   3  228.29   13.91
   0   1  -3  265.41   14.48
   0   1  -3  201.03   17.62
   0   1  -3  254.13   14.21
   0   1   3  244.46   14.47
   0   1   3  221.68   14.35
   0   1   3  254.48   13.88
   0   1  -3  245.30   14.02
   1  -1   3  122.55    7.02
  -1  -1  -3  111.29    5.35
  -1  -1  -3  106.52    6.85
  -1  -1  -3  114.59    7.03
   1  -1   3  111.66    5.39
   1   1   3  110.73    5.33
  -1   1  -3  112.66    5.39
  -1   1  -3  121.41    6.93
   1   1   3  119.86    7.13
   2  -1   3  595.35   26.51
   2  -1   3  580.46   25.72
  -2  -1  -3  558.04   33.00
  -2  -1  -3  620.64   33.56
   2  -1   3  545.44   33.01
  -2  -1  -3  533.75   25.67
  -2   1  -3  563.06   25.71
   2   1   3  581.87   33.07
   2   1   3  567.99   25.67
   3  -1   3   81.75    4.96
   3  -1   3   75.79    4.03
   3  -1   3   70.32    5.27
  -3  -1  -3   81.34    5.41
   3  -1   3   70.47    3.75
   3  -1   3   74.24    4.70
  -3  -1  -3   68.27    3.88
   3   1   3   75.68    5.33
   3   1   3   68.85    3.74
  -3   1  -3   64.64    3.85
   3   1   3   64.39    4.67
  -3   1  -3   72.31    4.66
   4  -1   3  140.33    8.59
   4  -1   3  125.33    6.47
   4  -1   3  136.29    8.13
  -4  -1  -3  138.69    9.04
  -4  -1  -3  138.81    6.72
   4  -1   3  139.92    8.59
   4  -1   3  132.44    6.70
   4   1   3  130.66    6.54
   4   1   3  141.25    8.79
  -4   1  -3  131.17    8.46
   4   1   3  124.67    8.03
  -4   1  -3  133.32    6.71
   4   1   3  128.95    6.82
   5  -1   3   13.58    2.81
  -5  -1  -3   13.46    2.08
  -5  -1  -3    5.92    3.31
   5   1   3   11.11    2.93
  -5   1  -3    7.64    2.64
  -5   1  -3    7.77    1.82
   6  -1   3    1.28    2.52
  -6  -1  -3   -1.50    5.02
  -6  -1  -3    5.30    2.33
   6   1   3    1.50    2.82
  -6   1  -3    2.85    3.59
  -6   1  -3    0.80    2.33
   7  -1   3    6.42    3.16
  -7  -1  -3    4.20    2.93
  -7   1  -3    6.10    2.76
   7   1   3    3.98    4.12
  -8  -1  -3   36.95    5.53
   8  -1   3   32.70    6.97
   8   1   3   35.63    7.32
  -8   1  -3   38.88    5.41
  -8  -2   3   31.13    4.40
   8  -2  -3   22.14    7.97
  -8  -2   3   34.41    6.59
  -8   2   3   30.08    4.15
  -7  -2   3   31.89    5.86
  -7  -2   3   32.33    4.46
   7  -2  -3   17.17    5.62
  -7   2   3   36.15    3.95
  -6  -2   3   23.88    3.55
  -6  -2   3   28.95    3.65
   6  -2  -3   21.49    4.83
  -6   2   3   26.42    5.02
   6   2  -3   20.63    3.61
  -6   2   3   23.16    3.46
   5  -2  -3    3.14    3.65
  -5  -2   3    1.82    2.41
  -5  -2   3    1.20    1.71
   5  -2  -3    0.60    2.55
   5   2  -3   -0.54    3.13
  -5   2   3    2.75    2.14
   5   2  -3    0.02    2.10
  -5   2   3    3.76    2.25
  -5   2   3    1.72    2.58
   4  -2  -3   52.17    3.28
  -4  -2   3   38.50    4.57
   4  -2  -3   45.78    3.91
  -4  -2   3   49.84    4.23
   4  -2  -3   45.24    5.43
   4   2  -3   43.79    3.06
   4   2  -3   45.84    3.36
  -4   2   3   46.81    3.49
  -4   2   3   42.41    4.30
   4   2  -3   45.40    5.23
  -4   2   3   46.35    4.06
  -4   2   3   45.45    3.11
  -3  -2   3   93.19    6.27
   3  -2  -3   98.42    5.01
   3  -2  -3   99.63    7.47
   3  -2  -3   99.86    6.01
  -3  -2   3  106.70    7.39
   3  -2  -3   98.13    6.35
   3   2  -3   85.35    4.79
  -3   2   3  102.46    6.19
  -3   2   3   96.36    5.20
   3   2  -3   93.73    6.00
  -3   2   3   97.27    6.56
   3   2  -3   99.81    7.50
   2  -2  -3  194.83    9.34
   2  -2  -3  200.74   12.36
  -2  -2   3  185.90   11.48
   2  -2  -3  211.95   11.81
   2  -2  -3  195.13   11.29
  -2  -2   3  207.43   12.57
  -2   2   3  200.65    9.43
  -2   2   3  199.67   11.35
   2   2  -3  204.93   12.51
  -2   2   3  203.09   12.09
   2   2  -3  185.12   11.42
   2   2  -3  204.79   11.65
   2   2  -3  172.09    9.11
  -1  -2   3  547.51   33.22
   1  -2  -3  638.53   34.88
   1  -2  -3  590.72   33.12
   1  -2  -3  592.19   34.04
  -1  -2   3  594.43   33.91
  -1  -2   3  534.68   34.81
  -1   2   3  588.85   27.24
  -1   2   3  545.11   33.10
   1   2  -3  627.56   33.92
  -1   2   3  622.38   34.06
  -1   2   3  602.93   34.83
   1   2  -3  555.31   33.22
   1   2  -3  644.58   34.91
   0  -2  -3  142.68   11.70
   0  -2   3  161.25    9.51
   0  -2  -3  150.32    9.47
   0  -2   3  146.12    7.31
   0  -2  -3  171.29    9.67
   0  -2   3  177.02    9.37
   0  -2   3  144.73    9.21
   0  -2   3  169.34   11.80
   0   2  -3  173.68    9.24
   0   2  -3  137.23    9.16
   0   2  -3  136.64   11.88
   0   2   3  153.60   11.51
   0   2   3  153.11    9.45
   0   2   3  174.49    9.66
  -1  -2  -3   97.64    4.86
   1  -2   3  109.87    7.97
   1  -2   3  104.90    5.13
   1  -2   3  105.76    6.39
  -1  -2  -3  104.38    6.44
  -1  -2  -3  117.02    6.55
   1  -2   3   95.37    4.92
   1   2   3   99.11    4.83
  -1   2  -3  108.98    6.40
  -1   2  -3  102.41    5.02
  -2  -2  -3    4.70    0.99
   2  -2   3    4.08    1.13
   2  -2   3    4.91    1.03
  -2  -2  -3    6.91    1.41
   2  -2   3    4.33    1.68
   2  -2   3    3.33    0.97
   2   2   3    3.19    1.36
   2   2   3    3.93    0.99
   2   2   3    9.33    1.94
  -2   2  -3    2.98    1.29
  -3  -2  -3   23.72    3.57
   3  -2   3   24.96    3.25
  -3  -2  -3   25.55    2.15
   3  -2   3   26.27    2.28
   3  -2   3   29.78    2.06
   3  -2   3   31.10    3.02
   3   2   3   28.81    2.41
  -3   2  -3   26.74    2.40
  -3   2  -3   26.38    2.35
   3   2   3   26.57    3.32
   3   2   3   26.66    2.02
   4  -2   3  160.63    9.90
   4  -2   3  148.02    9.64
   4  -2   3  155.45    7.58
  -4  -2  -3  152.16   10.33
   4  -2   3  153.17    9.20
  -4  -2  -3  151.50    7.44
   4  -2   3  150.59    7.34
  -4   2  -3  164.12    7.59
   4   2   3  143.48    9.19
  -4   2  -3  141.52    9.50
   4   2   3  160.09    9.85
   4   2   3  158.13    7.43
  -5  -2  -3   79.75    4.76
  -5  -2  -3   66.17    7.95
   5  -2   3   82.97    6.34
   5  -2   3   76.72    6.62
   5   2   3   81.28    6.57
  -5   2  -3   85.30    4.68
  -5   2  -3   71.38    6.12
   6  -2   3   81.78    7.22
   6  -2   3   80.66    6.76
  -6  -2  -3   84.67    5.30
  -6  -2  -3   77.69   10.08
   6   2   3   78.92    7.41
  -6   2  -3   85.25    5.30
   7  -2   3   20.07    3.83
  -7  -2  -3   22.98    3.38
  -7   2  -3   25.26    4.01
   7   2   3   20.66    4.41
  -8  -2  -3   12.65    3.83
   8  -2   3   12.75    4.67
   8   2   3   19.01    6.20
  -8   2  -3   10.55    3.53
  -8  -3   3    3.69    3.96
  -8  -3   3    2.02    3.92
   8  -3  -3   -1.60    7.50
  -8   3   3    6.53    3.31
   8   3  -3   10.15    6.25
  -7  -3   3   47.87    4.86
   7  -3  -3   31.69    6.30
  -7  -3   3   48.54    5.61
  -7   3   3   44.46    3.97
  -6  -3   3    3.02    2.73
   6  -3  -3   -2.11    4.56
  -6  -3   3    6.52    2.63
  -6   3   3    5.69    2.82
   6   3  -3    2.57    3.37
  -6   3   3    0.26    2.42
  -6   3   3    4.99    3.26
   5  -3  -3  146.82   11.36
  -5  -3   3  156.59    9.90
   5  -3  -3  156.13   10.17
  -5   3   3  156.37    8.33
  -5   3   3  154.52    7.90
  -5   3   3  158.15    9.87
   5   3  -3  150.22    8.05
   4  -3  -3    6.27    1.54
   4  -3  -3    6.75    2.08
  -4  -3   3    9.58    2.24
   4  -3  -3    7.21    2.92
  -4  -3   3    2.28    2.54
  -4   3   3    4.82    1.65
  -4   3   3    7.46    1.98
  -4   3   3    7.25    1.84
  -4   3   3    6.21    1.92
   4   3  -3    5.61    1.52
   4   3  -3    4.77    1.37
  -3  -3   3  142.66    8.99
   3  -3  -3  150.08    8.76
   3  -3  -3  152.70    9.96
  -3  -3   3  153.67   10.07
   3  -3  -3  150.79    7.23
   3  -3  -3  154.45    9.16
   3   3  -3  130.05    7.04
   3   3  -3  147.30    8.85
  -3   3   3  145.93    9.35
  -3   3   3  149.11    7.43
  -3   3   3  156.58    8.88
  -2  -3   3    1.99    2.72
   2  -3  -3    0.94    1.03
   2  -3  -3   -0.53    1.24
   2  -3  -3    2.19    1.86
  -2  -3   3    0.61    1.82
   2  -3  -3    0.83    0.93
  -2   3   3   -1.48    1.28
   2   3  -3   -0.33    1.25
   2   3  -3    0.19    1.38
  -2   3   3    0.23    1.11
  -2   3   3   -0.84    1.40
   1  -3  -3   24.17    2.90
   1  -3  -3   26.01    1.91
  -1  -3   3   21.94    1.90
  -1  -3   3   28.48    2.48
   1  -3  -3   25.60    2.52
   1  -3  -3   21.67    3.58
  -1  -3   3   25.18    3.11
  -1   3   3   23.34    2.07
  -1   3   3   21.34    1.72
  -1   3   3   26.44    2.73
  -1   3   3   23.33    2.37
   1   3  -3   24.81    2.11
   1   3  -3   28.05    2.20
   0  -3   3   14.24    1.77
   0  -3   3    7.27    1.09
   0  -3   3   10.11    1.92
   0  -3   3   10.58    1.52
   0  -3  -3    9.44    2.07
   0  -3   3   12.27    2.54
   0  -3  -3   10.18    2.72
   0  -3  -3   14.17    2.72
   0   3   3   12.20    1.92
   0   3   3   10.73    2.49
   0   3  -3    9.05    2.76
   0   3  -3   10.37    1.22
   0   3  -3   13.95    1.55
   0   3  -3   10.14    1.62
   0   3   3    8.56    1.73
   1  -3   3  307.00   17.67
  -1  -3  -3  300.08   18.09
  -1  -3  -3  293.66   17.77
   1  -3   3  302.77   13.79
   1  -3   3  304.95   22.17
   1  -3   3  318.42   14.20
  -1   3  -3  317.40   14.21
   1   3   3  301.39   22.29
   1   3   3  316.18   17.92
   1   3   3  276.94   13.65
  -1   3  -3  304.30   22.41
  -1   3  -3  310.74   13.84
   2  -3   3    1.71    1.71
  -2  -3  -3    1.58    1.42
   2  -3   3    4.72    1.21
   2  -3   3    0.17    2.20
  -2  -3  -3    2.34    0.98
   2  -3   3    1.26    1.01
   2  -3   3    2.74    1.13
  -2   3  -3    3.26    1.21
  -2   3  -3    4.57    1.48
   2   3   3    2.75    0.89
   2   3   3    1.55    1.21
   2   3   3    2.18    2.16
   3  -3   3  282.05   13.22
   3  -3   3  298.68   16.73
  -3  -3  -3  267.95   12.74
   3  -3   3  276.11   12.80
   3  -3   3  283.35   16.58
  -3  -3  -3  281.37   16.87
   3   3   3  269.30   12.74
  -3   3  -3  275.17   12.85
  -3   3  -3  290.30   16.59
   3   3   3  261.92   16.04
   3   3   3  276.94   16.58
   4  -3   3   10.30    2.38
   4  -3   3    8.70    2.54
   4  -3   3   11.93    2.50
  -4  -3  -3   10.42    1.72
  -4  -3  -3    8.00    3.16
  -4   3  -3   12.10    2.65
  -4   3  -3   11.73    1.79
   4   3   3   11.07    2.55
   5  -3   3   25.05    4.88
  -5  -3  -3   21.99    2.54
   5  -3   3   22.40    4.02
  -5  -3  -3   13.70    4.63
  -5   3  -3   18.50    2.45
   5   3   3   27.06    4.65
  -5   3  -3   23.66    3.98
  -6  -3  -3   -3.41    6.65
   6  -3   3    2.50    3.45
   6  -3   3    5.48    2.86
  -6  -3  -3    6.11    2.58
  -6   3  -3    3.27    2.28
   6   3   3    0.89    3.69
  -7  -3  -3   22.72    3.61
   7  -3   3   16.83    3.67
   7   3   3    9.63    5.04
  -7   3  -3   23.17    3.83
  -8  -3  -3    1.07    3.69
   8  -3   3    8.30    4.32
   8   3   3    5.89    6.35
  -8   3  -3    4.83    3.33
  -8  -4   3   44.97    6.16
   8  -4  -3   23.42    7.60
  -8  -4   3   31.84    4.69
   8   4  -3   29.81    7.14
  -8   4   3   39.77    4.99
  -7  -4   3    4.81    3.22
   7  -4  -3   -5.23    5.50
  -7  -4   3    4.09    3.17
  -7   4   3    2.70    2.76
  -6  -4   3   34.09    3.93
   6  -4  -3   28.00    5.70
  -6  -4   3   32.32    4.98
  -6   4   3   28.94    3.69
  -6   4   3   24.74    4.18
  -5  -4   3    3.91    2.47
   5  -4  -3    5.90    3.08
   5  -4  -3    4.02    3.82
  -5   4   3    3.87    2.51
  -5   4   3    5.13    2.25
  -5   4   3    5.93    2.18
   5   4  -3    4.27    2.13
   4  -4  -3   31.68    2.51
   4  -4  -3   25.81    5.05
   4  -4  -3   33.26    3.39
  -4  -4   3   30.53    3.53
  -4  -4   3   35.79    4.69
  -4   4   3   29.46    3.74
  -4   4   3   28.30    3.42
   4   4  -3   27.55    2.68
  -4   4   3   30.90    3.28
  -4   4   3   26.88    2.68
   3  -4  -3    9.05    1.28
   3  -4  -3   13.24    2.55
  -3  -4   3    9.25    2.55
   3  -4  -3   10.47    1.54
   3  -4  -3   14.18    1.95
  -3  -4   3   13.03    2.17
  -3   4   3   14.49    2.44
  -3   4   3   10.02    2.18
   3   4  -3   11.23    1.84
   3   4  -3   10.61    1.51
  -3   4   3   10.38    1.69
   3   4  -3   14.24    2.82
  -3   4   3    8.92    1.62
  -2  -4   3  473.03   28.09
   2  -4  -3  489.47   23.02
   2  -4  -3  520.77   28.76
   2  -4  -3  503.54   29.50
   2  -4  -3  495.51   36.12
  -2  -4   3  498.16   29.68
   2  -4  -3  491.19   27.82
  -2   4   3  518.69   27.85
  -2   4   3  502.80   23.07
   2   4  -3  468.79   28.03
  -2   4   3  488.46   29.43
   2   4  -3  494.15   28.53
   1  -4  -3  150.97   11.57
   1  -4  -3  152.85    9.48
   1  -4  -3  165.48    9.08
  -1  -4   3  123.60    8.74
   1   4  -3  160.97   12.74
  -1   4   3  138.47    7.41
   1   4  -3  158.43    8.83
   1   4  -3  130.20    8.72
  -1   4   3  158.42    9.17
  -1   4   3  151.47    9.29
   0  -4   3  109.16    6.91
   0  -4  -3  116.52    7.50
   0  -4   3  120.67    6.87
   0  -4   3  114.57    9.53
   0  -4  -3  124.07    7.48
   0  -4   3  114.31    5.50
   0  -4   3  110.06    5.53
   0   4  -3  111.49    6.98
   0   4   3  116.30    7.25
   0   4   3  121.03    7.28
   0   4   3  120.34    9.13
   0   4  -3  109.03    5.56
  -1  -4  -3    6.83    2.01
   1  -4   3    3.54    0.88
   1  -4   3    4.68    1.01
   1  -4   3    5.46    2.22
   1  -4   3    0.73    1.49
  -1  -4  -3    5.88    1.55
   1  -4   3    6.92    1.29
  -1   4  -3    3.89    1.34
   1   4   3   -2.53    3.19
   1   4   3   11.58    2.66
  -1   4  -3    3.51    1.28
  -1   4  -3    6.25    3.40
   1   4   3    5.09    1.16
   1   4   3    6.78    0.87
   2  -4   3    2.61    1.01
   2  -4   3    1.64    1.01
   2  -4   3    3.89    2.10
  -2  -4  -3    4.42    0.92
   2  -4   3    0.44    1.66
  -2   4  -3    3.42    1.39
  -2   4  -3    1.42    1.62
   2   4   3    1.97    1.22
   3  -4   3    0.64    2.03
   3  -4   3    0.03    0.95
   3  -4   3    0.90    1.80
   3  -4   3   -0.37    0.86
  -3  -4  -3    0.61    1.14
   3  -4   3   -1.34    1.55
   3   4   3   -0.56    1.10
  -3   4  -3   -0.50    1.28
  -3   4  -3    0.59    1.17
   3   4   3    2.45    1.84
  -3   4  -3    0.11    1.36
   4  -4   3  156.57   10.20
   4  -4   3  174.04    9.91
   4  -4   3  164.83   10.40
  -4  -4  -3  141.45   11.10
  -4  -4  -3  165.42    7.75
   4   4   3  148.91   10.26
  -4   4  -3  161.86   10.08
  -4   4  -3  162.34    7.84
  -5  -4  -3    7.98    4.67
   5  -4   3   22.39    4.05
   5  -4   3   17.94    3.58
  -5  -4  -3   22.70    2.80
   5   4   3   18.77    3.60
  -5   4  -3   21.33    3.03
  -5   4  -3   16.04    2.96
   6  -4   3  151.34   11.49
  -6  -4  -3  164.26    8.37
   6  -4   3  156.71   10.84
  -6   4  -3  173.49    8.46
   6   4   3  158.33   11.48
   7  -4   3    3.87    3.42
  -7  -4  -3    5.88    2.97
  -7   4  -3    8.61    2.77
   7   4   3    5.94    5.12
   8  -4   3   14.69    4.66
  -8  -4  -3   11.15    3.98
  -8   4  -3   23.57    3.65
   8   4   3   11.16    7.21
  -8  -5   3   10.62    4.32
   8  -5  -3   -3.99    8.36
   8   5  -3    3.16    7.49
  -7  -5   3   24.42    3.64
  -7  -5   3   27.29    4.97
   7  -5  -3   16.19    6.40
  -7   5   3   25.44    4.22
  -7   5   3   14.28    4.09
   7   5  -3   24.87    6.00
  -6  -5   3   54.63    4.48
  -6  -5   3   53.71    5.38
   6  -5  -3   40.98    8.23
  -6   5   3   54.31    5.54
  -6   5   3   47.18    4.44
   5  -5  -3   76.86    6.22
   5  -5  -3   66.46    7.86
  -5  -5   3   68.58    5.77
  -5   5   3   65.27    4.44
   5   5  -3   65.55    4.62
  -5   5   3   79.51    5.48
  -4  -5   3   79.98    5.81
   4  -5  -3   79.04    7.06
   4  -5  -3   83.13    5.56
   4   5  -3   71.67    4.43
  -4   5   3   81.43    4.72
  -4   5   3   84.77    5.15
  -3  -5   3  104.71    7.51
  -3  -5   3  102.70    6.76
   3  -5  -3  108.20    6.36
   3  -5  -3  104.66    5.31
   3  -5  -3  107.71    6.67
   3  -5  -3  110.95    7.62
  -3   5   3  102.01    6.93
   3   5  -3  100.71    6.49
  -3   5   3  107.04    5.65
  -3   5   3  109.52    6.40
   3   5  -3   94.32    6.73
  -3   5   3  106.48    5.42
   2  -5  -3   16.84    2.30
   2  -5  -3   16.47    3.14
   2  -5  -3   19.17    3.35
   2  -5  -3   17.10    1.60
   2  -5  -3   17.56    1.79
  -2  -5   3   14.23    2.68
  -2  -5   3   17.33    2.82
   2   5  -3   18.26    2.08
   2   5  -3   15.12    1.40
  -2   5   3   16.74    2.38
  -2   5   3   18.16    2.27
   2   5  -3   17.43    2.11
  -2   5   3   15.38    1.98
  -2   5   3   16.92    1.62
   1  -5  -3    5.71    1.73
   1  -5  -3   -1.08    2.78
  -1  -5   3    5.61    1.46
   1  -5  -3    2.99    1.76
   1   5  -3    4.28    0.82
  -1   5   3    2.73    2.90
  -1   5   3    3.36    2.21
   1   5  -3    5.10    1.30
  -1   5   3    4.59    1.51
   1   5  -3   -2.68    4.91
  -1   5   3    1.98    1.35
   0  -5   3  103.93    4.97
   0  -5   3  104.88    5.05
   0  -5  -3  103.58    7.01
   0  -5   3  108.90    6.13
   0  -5   3  101.62    6.27
   0  -5  -3  110.44    7.04
   0  -5   3   97.56    9.11
   0   5  -3  102.62    6.38
   0   5   3   96.80    6.53
   0   5   3   90.39    5.90
   0   5   3  100.91    8.86
   0   5   3  102.04    6.63
   0   5  -3   99.53    5.06
   1  -5   3  186.55    8.29
  -1  -5  -3  178.37   11.11
   1  -5   3  174.30   10.57
  -1  -5  -3  196.74   10.98
   1  -5   3  193.38    8.57
   1  -5   3  175.04   13.69
   1  -5   3  175.26   10.54
   1   5   3  171.03   11.19
   1   5   3  165.76   14.04
  -1   5  -3  160.46   14.61
   1   5   3  178.47   10.35
  -1   5  -3  172.93    8.59
  -1   5  -3  181.74    8.37
  -2  -5  -3   97.74    4.86
   2  -5   3  100.52    5.17
   2  -5   3  112.01    6.85
  -2  -5  -3  104.54    6.57
   2  -5   3  104.12    8.34
   2  -5   3  106.12    5.06
   2  -5   3   96.22    6.59
   2   5   3   99.33    6.41
  -2   5  -3  105.17    5.44
  -2   5  -3  105.63    5.26
   2   5   3  104.87    7.00
   2   5   3  106.17    9.80
   3  -5   3   99.37    6.76
  -3  -5  -3   96.71    4.84
   3  -5   3   92.46    5.01
   3  -5   3  100.63    4.90
   3  -5   3   92.95    8.08
  -3   5  -3   99.91    5.50
   3   5   3   99.78    6.28
   3   5   3  101.07    6.88
  -3   5  -3  100.77    5.16
   4  -5   3   83.27    6.11
  -4  -5  -3   70.15    7.51
   4  -5   3   90.22    6.64
  -4  -5  -3   84.39    4.62
   4   5   3   93.77    6.69
  -4   5  -3   81.46    5.05
  -4   5  -3   82.74    6.08
  -4   5  -3   80.79    4.83
  -5  -5  -3    5.06    4.88
  -5  -5  -3    4.53    2.06
   5  -5   3    5.46    3.65
   5   5   3   14.47    3.43
  -5   5  -3    5.83    2.16
  -5   5  -3    3.98    2.80
   6  -5   3    2.80    3.19
  -6  -5  -3    0.39    2.49
   6  -5   3    1.32    4.29
  -6   5  -3    6.30    2.42
   6   5   3   -3.04    4.09
   7  -5   3   14.16    3.77
  -7  -5  -3   10.68    3.08
   7   5   3    6.14    5.39
  -7   5  -3   16.62    2.93
  -8  -5  -3   25.06    4.67
   8   5   3   13.78    7.60
  -7  -6   3   35.99    6.05
   7  -6  -3   26.06    7.58
  -7  -6   3   40.31    4.98
  -7   6   3   41.04    4.85
  -7   6   3   35.85    4.68
   7   6  -3   37.23    6.30
  -6  -6   3    4.98    2.90
  -6  -6   3    4.64    2.61
   6  -6  -3   -2.16    5.50
  -6   6   3    3.49    3.27
   6   6  -3    3.68    4.39
  -6   6   3    5.26    2.78
   5  -6  -3   -1.04    3.06
  -5  -6   3   -0.96    2.50
   5  -6  -3    2.40    4.01
  -5   6   3    5.58    2.81
  -5   6   3    2.21    2.42
   5   6  -3    3.22    2.32
  -4  -6   3   17.77    3.03
   4  -6  -3   15.25    3.50
   4  -6  -3   16.33    3.19
   4   6  -3   14.41    3.14
  -4   6   3   18.28    2.39
  -4   6   3   18.79    2.63
   4   6  -3   14.33    2.43
   3  -6  -3  173.21   13.47
   3  -6  -3  172.26    8.45
   3  -6  -3  178.40   10.57
  -3  -6   3  172.33   11.21
   3  -6  -3  187.12   11.45
  -3  -6   3  162.49   10.50
   3  -6  -3  171.92   10.04
  -3   6   3  185.69    8.48
   3   6  -3  170.57   10.36
  -3   6   3  174.92   10.98
   3   6  -3  158.41   10.46
  -3   6   3  182.60    8.75
   2  -6  -3    3.39    0.99
   2  -6  -3    6.56    2.36
  -2  -6   3    5.89    1.62
   2  -6  -3    3.35    1.41
   2  -6  -3    3.60    1.98
  -2   6   3    3.26    1.50
   2   6  -3    3.35    0.97
  -2   6   3    4.11    1.37
   2   6  -3    3.87    1.37
  -2   6   3    3.90    1.17
   2   6  -3    2.90    4.71
   1  -6  -3  517.01   28.37
   1  -6  -3  494.70   29.16
  -1  -6   3  472.76   27.67
   1  -6  -3  482.27   35.75
   1   6  -3  490.01   36.06
  -1   6   3  504.77   21.96
   1   6  -3  450.68   27.62
  -1   6   3  483.82   29.05
  -1   6   3  507.20   28.42
  -1   6   3  504.59   35.80
  -1   6   3  490.20   22.80
   1   6  -3  466.70   22.55
   0  -6  -3    7.76    2.31
   0  -6   3    7.98    1.53
   0  -6   3    4.98    1.05
   0  -6  -3   -1.30    3.91
   0  -6   3    6.12    1.19
   0  -6   3    6.36    1.27
   0  -6  -3    5.27    2.05
   0   6  -3    6.70    1.29
   0   6   3    6.47    3.23
   0   6  -3    5.91    1.70
   0   6  -3    1.54    3.57
   0   6   3    5.14    2.08
   0   6   3    4.20    0.99
  -1  -6  -3   98.67    6.19
   1  -6   3   85.39    6.16
   1  -6   3   90.85    4.52
   1  -6   3   86.26    5.50
   1  -6   3   85.28    4.37
   1  -6   3   79.49    5.52
  -1  -6  -3   77.11   10.07
  -1  -6  -3   85.06    6.04
   1  -6   3   92.01    7.58
  -1   6  -3   82.61    4.71
   1   6   3  103.80    6.51
  -1   6  -3   77.03    9.32
  -1   6  -3   81.64    4.46
   1   6   3   84.08    5.42
   1   6   3   92.40    8.29
   2  -6   3    6.43    1.81
   2  -6   3    4.81    1.82
  -2  -6  -3    6.97    1.80
   2  -6   3    3.97    1.59
   2  -6   3    4.37    1.04
   2  -6   3    5.58    1.04
  -2  -6  -3    6.46    0.91
   2  -6   3    4.52    1.75
   2   6   3    3.52    1.57
  -2   6  -3    6.72    1.46
  -2   6  -3    6.23    1.56
   2   6   3    3.09    2.71
   2   6   3    6.96    4.09
   3  -6   3   14.37    2.38
   3  -6   3   18.83    3.63
   3  -6   3   14.70    1.81
  -3  -6  -3   16.06    1.84
   3  -6   3   16.09    1.60
   3   6   3   17.00    5.90
   3   6   3   10.59    2.82
  -3   6  -3   16.96    2.35
   3   6   3   12.14    2.54
  -3   6  -3   15.14    2.13
  -4  -6  -3   17.44    2.38
   4  -6   3   16.19    3.08
   4  -6   3   20.26    4.16
   4   6   3   16.33    3.14
  -4   6  -3   17.94    2.54
  -4   6  -3   21.46    2.56
  -5  -6  -3  110.43    5.86
   5  -6   3  112.13    7.86
   5  -6   3   92.82    8.74
  -5   6  -3  111.62    6.07
   5   6   3   98.43    8.11
  -5   6  -3   95.68    8.14
   6  -6   3   10.03    4.49
   6  -6   3   17.97    3.67
  -6  -6  -3   10.66    2.75
  -6   6  -3   18.89    2.80
   6   6   3    9.10    4.49
  -7  -6  -3   45.28    5.52
   7  -6   3   53.53    6.08
   7   6   3   57.39    8.81
  -7   6  -3   65.70    5.07
   7  -7  -3   -5.56    7.47
  -7  -7   3    4.00    4.00
  -7  -7   3    0.93    3.83
  -7   7   3   -1.26    4.08
   7   7  -3    1.69    5.63
  -7   7   3    6.32    3.63
  -6  -7   3   83.49    7.03
  -6  -7   3   83.86    5.83
   6  -7  -3   78.96   10.06
  -6   7   3   82.94    5.92
   6   7  -3   79.52    8.05
  -6   7   3   88.20    6.69
   5  -7  -3    2.46    4.73
  -5  -7   3    4.92    3.16
   5  -7  -3    1.57    3.29
  -5   7   3   10.22    2.67
   5   7  -3    4.65    2.98
   5   7  -3    7.07    4.63
  -5   7   3    3.94    2.61
   4  -7  -3  116.61    8.93
   4  -7  -3  113.57    7.01
  -4  -7   3  107.14    7.56
  -4   7   3  112.26    6.63
   4   7  -3  108.56    7.32
   4   7  -3  100.43    7.72
  -4   7   3  113.57    6.08
   3  -7  -3    4.40    1.78
   3  -7  -3    4.05    1.16
  -3  -7   3    3.11    1.93
   3  -7  -3    2.24    2.40
   3   7  -3    1.21    2.06
  -3   7   3    3.42    1.80
  -3   7   3    3.44    1.93
   3   7  -3   -0.73    1.54
   3   7  -3    0.63    6.67
   3   7  -3   -0.19    1.87
   2  -7  -3   53.33    4.15
   2  -7  -3   48.97    5.04
  -2  -7   3   51.33    4.14
   2  -7  -3   43.34    4.63
  -2   7   3   50.60    3.72
   2   7  -3   50.45    2.93
  -2   7   3   43.33    3.72
   2   7  -3   54.31    8.58
   2   7  -3   47.14    3.94
  -2   7   3   51.75    3.07
   1  -7  -3    5.52    2.68
   1  -7  -3    0.44    1.76
  -1  -7   3    3.64    1.58
   1  -7  -3    5.15    1.85
  -1   7   3    4.58    1.59
   1   7  -3    5.91    1.21
   1   7  -3    3.74    1.58
   1   7  -3    5.11    4.46
  -1   7   3    1.66    2.75
  -1   7   3    3.24    1.18
  -1   7   3    3.27    1.04
   0  -7   3  162.41    7.25
   0  -7  -3  151.17    9.76
   0  -7   3  157.64    7.42
   0  -7  -3  136.58   12.51
   0  -7  -3  159.58    9.75
   0  -7   3  152.03    8.95
   0  -7   3  148.08    8.91
   0  -7   3  135.96   12.16
   0   7   3  149.35    9.34
   0   7   3  154.29   12.43
   0   7   3  160.94    8.73
   0   7  -3  137.80   12.66
   0   7  -3  153.94    7.44
   0   7   3  150.95    7.63
   0   7  -3  157.56    9.21
   1  -7   3   -0.72    1.78
  -1  -7  -3   -7.23    5.06
   1  -7   3    3.95    1.10
   1  -7   3    2.88    1.37
  -1  -7  -3    0.63    1.88
   1  -7   3    3.23    1.23
   1  -7   3    5.84    2.11
   1  -7   3    2.93    1.43
  -1  -7  -3   -2.93    2.37
   1   7   3    1.47    2.16
   1   7   3    1.38    1.50
  -1   7  -3    3.29    1.42
  -1   7  -3   -3.83    4.22
   1   7   3    2.27    3.33
  -1   7  -3    1.32    1.42
   2  -7   3  263.73   12.02
   2  -7   3  247.83   14.63
   2  -7   3  234.24   18.82
   2  -7   3  258.32   11.69
  -2  -7  -3  229.07   14.91
   2  -7   3  260.51   15.51
  -2   7  -3  264.05   12.21
   2   7   3  242.50   15.39
   2   7   3  257.96   19.63
   2   7   3  250.47   14.68
  -2   7  -3  259.88   11.73
   3  -7   3    9.84    2.63
   3  -7   3   14.01    2.18
  -3  -7  -3    7.19    1.34
  -3   7  -3   11.08    1.92
   3   7   3    4.34    2.68
   3   7   3   10.85    3.33
   3   7   3   14.41    5.76
  -3   7  -3   11.03    1.86
  -4  -7  -3   92.62    5.33
   4  -7   3  114.75    8.07
   4  -7   3  106.71    7.45
  -4   7  -3  108.15    5.84
  -4   7  -3  100.14    6.04
   4   7   3  106.67   13.60
   4   7   3  101.19    8.00
   5  -7   3    8.96    3.24
   5  -7   3    0.27    3.65
  -5  -7  -3    0.75    2.06
  -5   7  -3    4.19    2.32
   5   7   3    2.42    3.93
  -6  -7  -3   -1.16    2.47
   6  -7   3    1.20    4.73
   6  -7   3   -3.95    3.65
  -6   7  -3    2.05    2.56
   6   7   3   -3.15    4.85
  -7  -7  -3    1.14    3.37
   7  -7   3    2.38    4.31
   7   7   3   -1.63    5.83
  -7   7  -3    0.09    3.02
   7  -8  -3   20.72    8.46
  -7  -8   3   29.06    4.41
  -7  -8   3   27.64    5.82
  -7   8   3   23.44    4.36
  -7   8   3   29.95    4.53
  -6  -8   3    7.69    3.06
  -6  -8   3    4.48    3.29
   6  -8  -3    4.39    5.72
   6   8  -3    6.34    4.47
  -6   8   3   12.42    3.41
  -6   8   3   13.37    3.27
   5  -8  -3    0.63    4.55
  -5  -8   3   -0.60    2.83
   5   8  -3    1.94    2.93
  -5   8   3    5.36    2.76
  -5   8   3    0.76    2.46
  -4  -8   3   14.49    2.90
   4  -8  -3   16.11    3.53
   4  -8  -3   17.00    2.90
   4   8  -3   15.64    3.24
  -4   8   3   18.38    2.62
   4   8  -3   15.46    3.04
   4   8  -3   19.42    9.99
  -4   8   3   20.49    2.67
   3  -8  -3  112.00    8.25
  -3  -8   3  102.99    7.34
  -3   8   3  115.74    6.30
  -3   8   3  117.29    5.99
   3   8  -3  107.40    5.72
   3   8  -3  113.97   12.48
  -2  -8   3   55.06    4.71
   2  -8  -3   60.95    5.34
   2  -8  -3   69.23    5.41
   2   8  -3   56.11    4.96
   2   8  -3   56.83    3.55
  -2   8   3   59.83    3.49
   2   8  -3   63.85    8.71
  -2   8   3   55.61    4.01
   1  -8  -3  213.01   12.76
   1  -8  -3  201.92   12.33
  -1  -8   3  203.37   11.76
   1  -8  -3  188.07   15.43
  -1  -8   3  200.42    9.43
  -1   8   3  200.20    9.18
   1   8  -3  205.17    9.60
  -1   8   3  201.67   15.70
   1   8  -3  192.48   11.83
   1   8  -3  182.02   16.52
  -1   8   3  204.04    9.95
   0  -8   3   37.41    5.32
   0  -8   3   39.88    3.24
   0  -8  -3   44.49    5.55
   0  -8  -3   39.71    4.32
   0  -8  -3   41.71    6.46
   0  -8   3   42.22    3.03
   0  -8   3   41.76    3.22
   0   8  -3   44.27    2.93
   0   8   3   36.98    2.85
   0   8  -3   38.11    4.38
   0   8  -3   38.20    6.53
   0   8   3   50.52    6.36
   0   8   3   35.91    3.59
   0   8   3   50.88    3.99
   1  -8   3   75.98    5.44
   1  -8   3   83.77    6.24
   1  -8   3   88.88    7.41
  -1  -8  -3   83.24    6.36
   1  -8   3   82.46    5.32
  -1  -8  -3   81.50    6.59
   1  -8   3   88.21    4.60
   1  -8   3   84.43    4.56
   1   8   3   82.02    5.56
  -1   8  -3   81.44    4.78
   1   8   3   82.54    5.95
   1   8   3   80.75    8.46
  -2  -8  -3    4.10    2.38
   2  -8   3    0.97    2.14
   2  -8   3    3.29    1.33
   2  -8   3    1.99    1.83
  -2  -8  -3    2.75    2.29
   2  -8   3    0.87    1.80
   2  -8   3    2.35    1.88
   2   8   3   -1.66    4.58
   2   8   3    1.47    3.10
  -2   8  -3    0.49    1.60
  -2   8  -3    0.90    1.96
   2   8   3    1.92    2.65
  -3  -8  -3   13.47    1.69
   3  -8   3   14.64    2.78
   3  -8   3   11.77    2.83
   3   8   3   13.26    6.27
   3   8   3    7.87    3.97
  -3   8  -3   17.68    2.40
  -3   8  -3   13.60    2.20
   3   8   3   13.30    3.08
  -4  -8  -3   35.87    3.00
   4  -8   3   37.42    4.90
   4  -8   3   38.89    5.80
   4   8   3   40.32    8.58
  -4   8  -3   41.95    4.37
  -4   8  -3   42.53    3.70
   4   8   3   37.88    6.33
   5  -8   3   73.85    8.55
  -5  -8  -3   69.33    4.48
   5  -8   3   83.52    6.92
  -5   8  -3   71.68    5.38
   5   8   3   46.72   11.46
   5   8   3   54.20    7.91
  -5   8  -3   79.85    5.08
   6  -8   3   22.47    4.71
   6  -8   3   13.63    5.62
  -6  -8  -3   18.25    3.24
   6   8   3   17.47    5.68
  -6   8  -3   22.40    3.27
   7  -8   3   37.83    6.49
  -7   8  -3   32.97    4.94
   7   8   3   20.41    7.67
  -7  -9   3   15.45    5.12
   7  -9  -3    4.92    8.38
  -7   9   3   14.44    4.62
  -7   9   3    9.91    4.25
   6  -9  -3    4.56    6.09
  -6  -9   3   15.96    4.42
  -6  -9   3   12.44    3.18
  -6   9   3    6.15    3.74
  -6   9   3    4.68    3.66
  -5  -9   3   79.23    7.36
  -5  -9   3   88.84    5.54
   5  -9  -3   96.05    9.63
  -5   9   3   98.96    6.23
  -5   9   3   96.98    6.09
   4  -9  -3   42.78    6.52
  -4  -9   3   43.64    5.25
   4   9  -3   30.98    8.35
  -4   9   3   48.47    4.53
  -4   9   3   38.31    3.84
   4   9  -3   32.45    3.45
   3  -9  -3   59.02    5.94
  -3  -9   3   53.72    5.26
  -3   9   3   57.21    4.09
  -3   9   3   62.29    4.40
   3   9  -3   69.69   11.60
   3   9  -3   55.24    3.69
   2  -9  -3    6.26    2.65
   2  -9  -3    3.90    3.49
  -2  -9   3    8.46    2.32
  -2   9   3    6.71    1.72
   2   9  -3    7.66    6.42
  -2   9   3    6.44    2.06
   2   9  -3    6.43    1.75
   2   9  -3    8.87    3.02
   1  -9  -3    4.40    2.21
  -1  -9   3    8.49    2.00
  -1  -9   3    7.23    1.88
   1  -9  -3    6.35    3.05
   1   9  -3    7.34    1.83
   1   9  -3    4.19    2.62
   1   9  -3    6.40    4.74
  -1   9   3    9.05    4.26
  -1   9   3    2.56    2.25
  -1   9   3    3.00    1.32
   0  -9   3   59.24    3.69
   0  -9  -3   53.59    4.98
   0  -9  -3   45.47    6.84
   0  -9   3   66.06    4.18
   0  -9  -3   60.10    7.53
   0   9  -3   60.38    5.59
   0   9   3   51.97    4.80
   0   9  -3   44.10    7.96
   0   9   3   48.39    7.58
   0   9  -3   55.77    3.73
   0   9   3   58.19    4.34
  -1  -9  -3  159.54   10.49
   1  -9   3  164.09   10.62
   1  -9   3  159.39    7.94
   1  -9   3  158.80    9.66
   1  -9   3  165.18    9.54
   1  -9   3  162.12    8.19
  -1  -9  -3  151.47   10.62
   1   9   3  156.32   13.63
   1   9   3  169.01   10.10
  -1   9  -3  131.01   14.74
  -1   9  -3  165.82    8.22
   1   9   3  159.78    9.69
   2  -9   3   75.92    4.96
  -2  -9  -3   61.62    5.55
   2  -9   3   63.47    5.98
   2  -9   3   81.32    4.67
   2  -9   3   67.49    5.09
  -2  -9  -3   61.92    5.76
  -2   9  -3   74.06    4.88
  -2   9  -3   75.01    4.37
   2   9   3   63.02    9.19
   2   9   3   60.13    6.10
  -2   9  -3   46.56   10.21
   2   9   3   67.74    5.84
   3  -9   3  160.35   10.71
   3  -9   3  139.43    9.29
  -3   9  -3  152.21    8.05
  -3   9  -3  155.91    7.82
   3   9   3  155.82   14.62
   3   9   3  140.76   10.24
   3   9   3  139.92   10.83
   4  -9   3   21.45    3.41
  -4  -9  -3   15.93    2.46
   4  -9   3   22.98    4.55
   4  -9   3   19.76    4.14
   4   9   3   16.07    5.12
  -4   9  -3   20.38    2.79
   4   9   3    7.29    8.15
  -4   9  -3   21.55    3.54
  -5  -9  -3    4.73    2.23
   5  -9   3   13.52    4.37
   5  -9   3   -2.12    4.82
   5   9   3   -2.98    8.45
  -5   9  -3    3.07    2.46
  -5   9  -3    6.90    2.78
   5   9   3    3.24    4.85
   6  -9   3    1.90    5.62
   6  -9   3    6.97    4.59
   6   9   3   -6.56    8.82
   6   9   3    1.88    5.98
  -6   9  -3    5.68    3.30
   7  -9   3   12.85    5.69
  -7   9  -3   17.28    4.12
   7   9   3  -25.07   14.19
   6 -10  -3    9.99    6.92
  -6 -10   3   16.40    4.24
  -6  10   3   20.79    4.12
  -6  10   3   13.11    4.08
   6  10  -3   -2.61    8.35
  -5 -10   3    0.69    3.34
  -5 -10   3    4.79    2.66
   5 -10  -3   -1.43    5.05
  -5  10   3    2.91    3.22
  -5  10   3    0.21    3.16
   5  10  -3   -3.90    8.54
   4 -10  -3   37.61    6.52
  -4 -10   3   35.90    5.28
   4  10  -3   33.62    3.45
   4  10  -3   48.84   11.47
  -4  10   3   34.95    4.28
  -4  10   3   34.25    4.57
   3 -10  -3   -0.74    2.53
  -3 -10   3   -0.22    2.65
  -3  10   3    5.89    2.80
  -3  10   3    1.02    2.19
   3  10  -3    2.80    1.96
   3  10  -3   -4.12    7.78
  -2 -10   3  108.88    7.36
   2 -10  -3  115.63    8.37
   2 -10  -3  101.93    8.97
  -2 -10   3   96.94    6.24
  -2  10   3  117.27    6.36
   2  10  -3  100.03    5.88
  -2  10   3  112.30    5.62
   2  10  -3  117.45   12.05
  -1 -10   3    3.58    1.94
   1 -10  -3    0.97    3.83
   1 -10  -3   -0.79    2.72
  -1 -10   3    4.05    2.15
  -1  10   3    1.36    1.34
   1  10  -3   -2.30    4.88
  -1  10   3    0.21    4.71
   1  10  -3    2.45    3.25
  -1  10   3    2.75    2.54
   1  10  -3    2.11    2.07
   0 -10  -3  105.92    7.86
   0 -10   3  100.21    6.61
   0 -10   3  102.39    5.68
   0 -10  -3   92.97    9.27
   0  10  -3  103.91    5.78
   0  10   3  106.42    6.28
   0  10   3  117.34   10.81
   0  10  -3  102.42   11.71
   0  10  -3   86.52    7.97
  -1 -10  -3    1.80    2.77
  -1 -10  -3   -3.11    3.59
   1 -10   3    0.07    1.73
   1 -10   3   -0.72    2.88
   1 -10   3   -1.16    1.94
   1 -10   3    0.94    2.51
   1 -10   3    0.68    2.26
   1 -10   3    0.88    2.13
  -1  10  -3   -0.85    2.24
   1  10   3   -0.20    2.56
   1  10   3   -6.69    4.86
   1  10   3    1.92    2.72
   2 -10   3    5.34    2.44
   2 -10   3    3.44    2.65
  -2 -10  -3    4.39    3.08
  -2 -10  -3    6.96    2.90
   2 -10   3    2.95    1.92
   2 -10   3    1.67    3.08
  -2  10  -3    6.70    2.54
   2  10   3    4.35    5.75
  -2  10  -3    1.13    2.24
   2  10   3    1.90    3.51
   2  10   3    3.57    3.26
  -2  10  -3    2.44    6.93
   3 -10   3    2.72    2.97
   3 -10   3   -1.24    3.35
   3 -10   3    0.68    2.46
  -3  10  -3    0.41    2.50
   3  10   3   10.71    6.94
   3  10   3    1.55    4.33
  -3  10  -3    3.06    2.32
   4 -10   3   92.75    7.66
   4 -10   3   95.43    9.11
   4 -10   3  100.50    7.48
   4  10   3   85.42   13.29
  -4  10  -3   89.77    6.15
  -4  10  -3  100.15    6.03
   5 -10   3    1.47    4.10
   5 -10   3   -2.36    5.47
   5 -10   3    2.64    4.11
   5  10   3   -6.07    6.00
  -5  10  -3    2.68    3.07
  -5  10  -3    2.37    2.58
   5  10   3   10.19    9.52
   6 -10   3   74.73    8.67
   6  10   3   64.40   14.97
  -6  10  -3   70.94    6.32
   6 -11  -3    1.53    7.47
  -6 -11   3    9.04    5.13
   6  11  -3    4.92    8.45
  -6  11   3    2.33    4.28
  -6  11   3    5.77    3.65
  -5 -11   3   58.26    7.19
   5 -11  -3   50.86    9.37
  -5  11   3   67.70    5.88
   5  11  -3   42.93   10.56
  -5  11   3   45.51    5.77
   4 -11  -3   11.99    4.39
  -4 -11   3   18.85    3.77
  -4  11   3    9.95    3.19
  -4  11   3   17.46    3.27
   4  11  -3   12.67    8.90
   3 -11  -3   47.99    5.87
  -3 -11   3   56.55    5.55
  -3  11   3   52.66    4.62
   3  11  -3   50.16    4.24
  -3  11   3   57.11    4.39
   3  11  -3   72.39   11.35
   2 -11  -3    7.13    3.33
  -2 -11   3    7.25    2.72
  -2 -11   3   10.32    2.72
  -2  11   3    8.90    2.81
   2  11  -3   12.36    7.20
  -2  11   3    9.11    1.93
   2  11  -3   11.39    2.37
   1 -11  -3    6.81    3.19
  -1 -11   3    8.32    2.30
  -1 -11   3    9.09    2.49
   1 -11  -3    9.65    5.14
   1  11  -3    7.95    3.90
  -1  11   3   10.49    4.73
  -1  11   3    7.72    1.56
   1  11  -3   11.06    5.61
  -1  11   3    9.30    2.96
   1  11  -3   11.11    2.43
   0 -11   3   15.32    3.05
   0 -11   3   15.17    2.41
   0 -11  -3   15.13    3.38
   0 -11  -3    4.83    5.75
   0 -11   3   17.58    3.78
   0  11   3   23.99    6.07
   0  11   3   18.30    3.23
   0  11  -3   15.32    6.87
   0  11  -3   17.66    2.83
   0  11  -3   10.82    4.54
   1 -11   3  122.87    6.76
   1 -11   3   98.73    7.33
   1 -11   3  107.95    6.01
  -1 -11  -3   87.93    8.39
  -1 -11  -3  111.41    8.36
   1 -11   3  101.59    6.92
   1 -11   3  104.27    8.58
   1  11   3   92.95    7.48
  -1  11  -3  111.87    6.48
   1  11   3  115.24    7.01
  -1  11  -3   90.10   12.11
   1  11   3   99.16   11.45
   1  11   3  103.21    7.45
  -2 -11  -3   56.89    6.10
   2 -11   3   50.42    4.22
   2 -11   3   48.01    6.95
   2 -11   3   49.87    4.80
   2 -11   3   58.65    6.20
  -2 -11  -3   47.23    5.40
   2  11   3   48.25    5.61
  -2  11  -3   53.25    4.90
   2  11   3   60.73    9.49
  -2  11  -3   33.22    9.15
   2  11   3   41.78    6.31
  -2  11  -3   46.88    4.07
   3 -11   3   95.65    7.49
   3 -11   3  103.75    9.09
  -3 -11  -3   92.79    8.47
   3 -11   3   96.97    6.67
  -3  11  -3   99.15    5.81
  -3  11  -3  100.02    6.73
   3  11   3  101.09   12.96
   3  11   3   78.67    8.14
   4 -11   3    8.78    3.59
   4 -11   3   10.36    5.09
   4 -11   3   11.87    4.19
  -4  11  -3   13.88    3.30
   4  11   3   24.74    9.03
   4  11   3    3.65    5.61
  -4  11  -3    7.77    2.99
   5 -11   3    6.97    4.64
   5 -11   3    5.02    6.34
  -5  11  -3    2.51    3.25
  -5  11  -3    7.59    3.59
   5  11   3    7.24   10.40
   6 -11   3   -1.08    5.44
  -6  11  -3    5.71    4.20
   6  11   3   12.04   12.52
  -6 -12   3    4.06    5.64
   6 -12  -3   -8.58    8.22
  -6  12   3    9.21    4.88
   5 -12  -3   -1.11    6.01
  -5 -12   3   -1.00    3.92
   5  12  -3   17.57    9.98
  -5  12   3   -2.09    3.58
  -5  12   3    2.32    4.15
  -4 -12   3    5.81    3.84
   4 -12  -3    6.33    4.68
   4  12  -3   27.96    8.23
  -4  12   3   10.05    3.02
  -4  12   3    8.40    3.31
  -3 -12   3   41.57    5.46
   3 -12  -3   40.09    6.48
   3  12  -3   59.06   10.19
  -3  12   3   42.15    4.24
  -3  12   3   44.58    4.50
   3  12  -3   41.91    4.40
  -2 -12   3   45.81    4.87
   2 -12  -3   31.56    5.94
  -2  12   3   44.19    3.52
  -2  12   3   48.82    4.47
   2  12  -3   44.48    4.42
   2  12  -3   55.73   10.43
   1 -12  -3   73.86   10.25
  -1 -12   3   72.81    5.05
   1 -12  -3   84.22    6.97
  -1 -12   3   79.29    6.08
   1  12  -3   60.76    7.45
   1  12  -3   85.49    5.45
  -1  12   3   94.39   10.57
  -1  12   3   76.23    5.97
   1  12  -3   89.85   11.28
   0 -12   3   35.45    3.96
   0 -12   3   37.94    6.18
   0 -12  -3   26.86    4.82
   0 -12   3   36.71    4.07
   0  12  -3   36.23    4.60
   0  12   3   32.57    7.04
   0  12  -3   25.96    8.12
   0  12   3   30.88    4.34
   1 -12   3   12.67    3.48
   1 -12   3    9.21    4.21
  -1 -12  -3   11.35    4.42
   1 -12   3   12.88    2.62
   1 -12   3   11.23    3.11
  -1 -12  -3   13.01    3.23
   1 -12   3   13.93    2.42
  -1  12  -3   16.44    3.11
   1  12   3   16.20    6.61
  -1  12  -3    8.85    6.86
   1  12   3   16.83    3.79
   2 -12   3    5.72    3.09
   2 -12   3   -0.50    4.06
  -2 -12  -3    2.18    3.68
   2 -12   3    0.81    2.03
  -2  12  -3    4.20    3.23
  -2  12  -3    2.67    7.40
   2  12   3   -6.58    3.94
   2  12   3    2.70    6.83
   2  12   3    2.65    3.48
   3 -12   3    0.79    3.66
   3 -12   3   -2.59    4.94
  -3 -12  -3    4.68    4.11
   3 -12   3   -0.26    2.35
   3  12   3   12.69    8.43
  -3  12  -3   10.01    3.47
  -3  12  -3    2.73    3.01
  -4 -12  -3   36.44    7.44
   4 -12   3   43.71    9.10
   4 -12   3   37.13    6.19
  -4  12  -3   38.07    4.87
   4  12   3   40.39   10.61
  -4  12  -3   42.05    5.14
   5 -12   3   35.65    7.54
   5 -12   3   28.08    7.84
  -5  12  -3   45.99    5.18
   5  12   3   68.58   15.10
  -5  12  -3   37.55    5.67
  -5 -13   3    4.69    4.38
   5 -13  -3    3.68    6.88
  -5  13   3   -0.61    3.60
   5  13  -3   26.91    9.70
  -5  13   3    3.36    4.65
   4 -13  -3   41.64    8.44
  -4 -13   3   54.41    7.10
  -4  13   3   60.89    5.96
  -4  13   3   54.52    5.62
   4  13  -3   62.46   13.51
  -3 -13   3    0.40    3.45
   3 -13  -3    2.07    3.99
  -3  13   3    0.68    2.83
  -3  13   3    3.52    3.01
   3  13  -3    5.85    8.70
   2 -13  -3    4.65    3.83
  -2 -13   3    9.68    3.36
  -2  13   3    5.33    2.35
   2  13  -3   16.39    7.89
   2  13  -3    7.97    3.15
  -2  13   3    0.90    3.38
   1 -13  -3   -2.57    3.44
  -1 -13   3   -1.70    2.65
   1  13  -3    0.07    3.08
   1  13  -3   -5.59    6.52
  -1  13   3   -8.90    3.44
  -1  13   3   -7.62    6.41
   0 -13  -3   64.37    7.05
   0 -13   3   62.69    7.65
   0 -13   3   60.11    5.40
   0  13  -3   71.49    5.89
   0  13   3   57.45    6.16
   0  13  -3   74.61   11.78
   0  13   3   74.15   10.72
   1 -13   3    7.74    4.51
  -1 -13  -3    2.79    3.73
   1 -13   3    6.48    2.43
   1  13   3   13.92    7.33
   1  13   3    3.35    4.21
  -1  13  -3    4.29    3.27
  -1  13  -3    3.72    7.92
   2 -13   3   80.61    6.95
  -2 -13  -3  100.14    8.55
   2 -13   3   86.48    8.93
   2  13   3   86.13   11.20
  -2  13  -3   85.96    6.90
   2  13   3   84.33    7.50
  -2  13  -3   58.84   14.04
   3 -13   3    2.01    4.06
  -3 -13  -3    8.79    4.68
   3 -13   3   -2.94    5.05
   3  13   3   13.39    9.20
  -3  13  -3    0.57    3.86
  -3  13  -3    0.02    3.33
   3  13   3   -5.15    4.98
   4 -13   3   38.01    6.41
  -4 -13  -3   32.47    6.27
   4 -13   3   46.38    9.27
   4  13   3   52.46   11.87
  -4  13  -3   32.32    4.62
  -4  13  -3   32.96    5.69
   5 -13   3   -3.02    8.22
   5 -13   3   -0.47    6.06
  -5 -13  -3    4.12    6.91
  -5  13  -3    1.31    4.34
   5  13   3   23.04   13.18
  -5  13  -3   -0.72    3.66
  -4 -14   3   -3.68    4.58
   4 -14  -3    1.06    5.53
   4  14  -3   14.63    9.60
  -4  14   3   -4.66    4.03
   3 -14  -3   40.72    7.00
  -3 -14   3   47.07    6.61
   3  14  -3   52.70   12.88
  -3  14   3   57.12    5.51
   2 -14  -3    9.67    3.81
  -2 -14   3    6.82    3.76
  -2  14   3   12.23    3.60
   2  14  -3    9.43    3.74
   2  14  -3   30.90    8.71
  -1 -14   3  105.71    7.87
  -1 -14   3  110.10    9.51
   1 -14  -3  106.00    9.22
  -1  14   3  115.84    7.92
  -1  14   3  111.89   13.12
   1  14  -3  108.50   13.45
   1  14  -3  103.00    7.47
   0 -14   3    3.49    4.29
   0 -14   3    1.30    2.90
   0 -14  -3   -0.45    3.92
   0  14   3    3.39    7.51
   0  14  -3   14.63    8.77
   0  14   3    5.27    4.33
   0  14  -3    4.84    3.51
   1 -14   3   43.60    8.37
  -1 -14  -3   61.34    6.72
   1  14   3   62.95    6.87
  -1  14  -3   57.57    6.22
   1  14   3   66.17   11.87
  -1  14  -3   61.20   12.23
  -2 -14  -3   -2.22    4.50
   2 -14   3   -1.42    5.31
  -2  14  -3   -1.47    4.15
   2  14   3   13.89    8.99
   2  14   3    3.12    4.93
   3 -14   3   12.74    6.93
  -3 -14  -3   12.21    5.60
  -3  14  -3   25.44    4.71
   3  14   3   28.17   10.24
   3  14   3    8.83    6.28
   4 -14   3   -0.18    6.91
  -4 -14  -3    5.72    6.00
  -4  14  -3    0.43    4.58
   4  14   3   16.20   12.06
   4  14   3  -12.87    7.01
  -4  14  -3   -2.52    4.66
   4 -15  -3   12.96    6.75
   3 -15  -3    1.68    5.32
  -3 -15   3    1.97    4.37
  -3  15   3    7.80    4.65
   3  15  -3   22.55    9.30
   2 -15  -3    4.95    4.71
   2  15  -3   27.78    9.91
  -2  15   3   -2.35    4.64
   1 -15  -3    2.43    4.54
  -1 -15   3    0.98    5.18
   1  15  -3   11.95    8.02
  -1  15   3   11.64    8.38
   1  15  -3    3.66    4.26
  -1  15   3   -0.66    4.65
   0 -15  -3   18.88    5.09
   0 -15   3   23.92    6.24
   0  15   3   20.99    4.49
   0  15   3   28.00    9.09
   0  15  -3   30.42    4.97
   0  15  -3   36.82    8.76
  -1 -15  -3   12.41    4.94
   1 -15   3   13.80    5.97
  -1  15  -3   30.55    9.70
   1  15   3   26.62    5.45
  -1  15  -3   17.05    5.09
  -2 -15  -3   43.94    7.88
   2 -15   3   27.56    6.92
   2  15   3   28.76   10.37
  -2  15  -3   30.88    5.21
   2  15   3   32.38    6.22
  -3 -15  -3   15.03    5.57
   3 -15   3   17.97    7.13
  -3  15  -3   15.54    5.21
   3  15   3   42.74   11.96
   3  15   3   29.72    7.24
  -2 -16   3   56.63    9.03
   2 -16  -3   48.89    8.76
   2  16  -3   60.82   12.42
  -2  16   3   42.40    6.39
   1 -16  -3   12.78    5.33
  -1 -16   3   14.22    5.48
   1  16  -3   30.68    9.58
  -1  16   3   21.02    9.83
  -1  16   3    6.05    4.72
   0 -16  -3   44.13    7.19
   0 -16   3   35.61    7.38
   0  16  -3   34.26    5.39
   0  16  -3   49.15   11.77
   0  16   3   56.89   12.62
   0  16   3   59.67    8.04
   1 -16   3   -1.48    6.61
  -1 -16  -3    3.03    5.22
   1  16   3   24.36   10.69
   1  16   3    5.95    5.99
  -1  16  -3    3.76   10.72
  -1  16  -3    1.88    5.13
   2 -16   3    2.63    7.47
  -2 -16  -3    0.25    5.77
   2  16   3   -0.04    6.55
  -2  16  -3    5.94    5.55
   2  16   3   -9.72   11.73
  -8   0   4   50.00    7.21
   8   0  -4   24.23    7.20
  -8   0   4   34.52    4.57
  -7   0   4    3.29    3.69
   7   0  -4   -0.62    5.15
  -7   0   4    4.20    2.82
  -6   0   4   11.88    3.18
  -6   0   4   13.02    2.31
   6   0  -4    3.50    4.33
  -5   0   4    0.57    2.43
   5   0  -4   -1.37    3.53
   5   0  -4    3.85    2.54
  -4   0   4  221.09   10.45
   4   0  -4  227.91   10.44
   4   0  -4  230.41   12.72
   4   0  -4  214.08   13.99
   4   0  -4  204.81   13.00
  -4   0   4  219.49   12.79
  -4   0   4  187.81   13.55
   3   0  -4    0.57    1.08
   3   0  -4    2.48    2.43
   3   0  -4   -0.70    1.23
  -3   0   4    0.46    1.16
  -3   0   4    1.98    1.89
  -3   0   4   -0.52    1.78
   3   0  -4   -0.64    1.44
   2   0  -4  471.65   28.94
   2   0  -4  520.35   28.17
  -2   0   4  492.57   28.96
   2   0  -4  491.72   27.44
  -2   0   4  485.67   22.42
   2   0  -4  479.72   22.39
  -2   0   4  457.08   27.44
   1   0  -4    1.23    1.45
   1   0  -4    2.54    1.72
   1   0  -4    0.36    1.07
  -1   0   4   -0.80    1.25
  -1   0   4   -1.35    1.51
  -1   0   4    0.02    1.02
   0   0   4  162.66    9.53
   0   0  -4  161.47    9.42
   0   0   4  132.18    8.92
   0   0   4  147.59    9.15
   0   0  -4  148.56    9.19
   1   0   4   -0.96    0.77
  -1   0  -4   -0.69    1.35
   1   0   4   -0.60    0.53
  -1   0  -4    1.45    0.97
   1   0   4    1.88    1.72
  -2   0  -4   40.95    3.26
  -2   0  -4   31.47    2.53
   2   0   4   28.98    2.26
   2   0   4   44.21    3.73
  -3   0  -4    0.82    1.25
   3   0   4    2.13    1.94
   3   0   4   -1.46    0.92
   4   0   4  199.13    9.45
  -4   0  -4  205.23    9.57
   4   0   4  194.47   11.76
   4   0   4  203.09   12.45
  -5   0  -4    0.57    2.27
   5   0   4    6.36    2.74
  -5   0  -4    2.26    1.95
   6   0   4  164.02   11.14
  -6   0  -4  169.42    8.55
  -7   0  -4    3.98    2.96
   7   0   4    1.14    3.74
  -8   0  -4   23.41    4.22
   8   0   4   17.77    5.48
  -8  -1   4    3.09    5.21
  -8  -1   4    5.56    3.95
   8  -1  -4   -0.63    6.66
  -8   1   4    2.81    3.03
   7  -1  -4   39.14    7.21
  -7  -1   4   63.58    7.01
  -7  -1   4   59.49    4.85
  -7   1   4   56.84    4.45
  -7   1   4   60.15    6.49
   7   1  -4   53.98    8.58
  -6  -1   4   32.04    3.78
   6  -1  -4   21.13    4.95
  -6  -1   4   30.20    5.18
   6   1  -4   26.54    3.62
  -6   1   4   29.71    3.62
   6   1  -4   20.74    4.87
  -6   1   4   26.19    4.66
   5  -1  -4  171.01    8.99
   5  -1  -4  162.29   12.21
  -5  -1   4  179.13   10.87
   5   1  -4  167.69   12.07
  -5   1   4  168.71    8.54
  -5   1   4  178.38   10.87
  -5   1   4  172.41    8.94
   5   1  -4  159.64    8.80
  -4  -1   4   47.08    4.14
   4  -1  -4   41.26    5.52
   4  -1  -4   45.16    3.41
   4  -1  -4   38.92    3.60
   4  -1  -4   43.63    3.63
  -4  -1   4   28.96    4.43
  -4   1   4   47.40    4.03
  -4   1   4   36.95    3.98
   4   1  -4   42.17    3.02
  -4   1   4   43.92    3.38
   4   1  -4   41.31    5.38
   4   1  -4   38.58    3.18
  -3  -1   4   84.10    4.52
  -3  -1   4   90.07    6.49
   3  -1  -4   84.37    5.50
  -3  -1   4   87.76    5.80
   3  -1  -4   90.02    4.63
   3  -1  -4   93.20    5.85
   3  -1  -4  101.62    7.22
   3   1  -4   99.79    7.20
   3   1  -4   83.20    5.49
   3   1  -4   88.43    5.86
   3   1  -4   84.76    4.48
  -3   1   4   84.17    4.67
  -3   1   4   91.84    5.84
  -3   1   4   86.74    6.24
   2  -1  -4    6.59    1.08
  -2  -1   4    4.12    0.80
  -2  -1   4    9.66    2.19
  -2  -1   4    6.14    1.76
   2  -1  -4    6.25    1.81
   2  -1  -4    8.90    2.51
   2  -1  -4    5.15    1.26
   2   1  -4    6.60    1.87
  -2   1   4    5.02    1.10
  -2   1   4    4.81    1.97
  -2   1   4    6.18    1.55
   2   1  -4    6.35    1.29
  -1  -1   4   32.29    3.30
   1  -1  -4   29.11    2.85
   1  -1  -4   32.29    2.29
  -1  -1   4   25.48    2.49
   1  -1  -4   30.07    3.29
  -1  -1   4   26.41    2.65
  -1   1   4   22.95    3.00
  -1   1   4   29.27    2.27
  -1   1   4   25.94    2.88
   1   1  -4   31.58    3.52
   1   1  -4   31.64    2.28
   1   1  -4   25.87    2.65
   0  -1   4   92.34    6.04
   0  -1  -4   86.07    6.38
   0  -1   4  102.74    6.48
   0  -1  -4   97.25    6.10
   0  -1   4  102.36    6.11
   0   1  -4  110.64    6.23
   0   1   4   87.08    5.92
   0   1   4   96.67    6.74
   0   1  -4   99.99    6.23
   0   1   4  100.24    6.01
   0   1  -4   83.90    6.20
   0   1  -4   81.19    7.39
   1  -1   4  432.21   19.62
   1  -1   4  407.69   25.21
  -1  -1  -4  414.72   25.54
   1  -1   4  431.56   25.51
   1  -1   4  396.80   31.26
  -1  -1  -4  467.01   25.29
   1   1   4  420.02   25.55
  -1   1  -4  447.33   19.64
   1   1   4  447.37   19.59
   1   1   4  463.91   25.34
  -1   1  -4  463.14   25.21
  -2  -1  -4  122.15    5.82
   2  -1   4  120.86    5.76
  -2  -1  -4  120.89    7.51
   2  -1   4  127.27    7.76
  -2  -1  -4  110.99    7.20
  -2   1  -4  121.20    5.92
   2   1   4  115.17    5.73
   2   1   4  121.38    7.67
  -2   1  -4  125.32    7.57
   3  -1   4  282.74   13.06
  -3  -1  -4  305.56   16.99
   3  -1   4  295.22   13.56
   3  -1   4  291.37   16.95
  -3  -1  -4  263.75   13.05
  -3   1  -4  281.22   13.12
   3   1   4  281.83   16.42
   3   1   4  272.99   13.04
   3   1   4  286.51   16.92
   4  -1   4    2.44    1.13
  -4  -1  -4    3.47    1.47
   4  -1   4    4.62    1.91
   4  -1   4    5.53    1.32
   4  -1   4    3.05    1.24
  -4  -1  -4    3.99    2.21
   4   1   4    7.74    2.32
  -4   1  -4    4.97    1.36
   4   1   4    3.30    1.30
  -4   1  -4    5.79    1.60
   5  -1   4    6.14    2.71
  -5  -1  -4   -1.06    2.97
  -5  -1  -4    4.18    1.97
  -5   1  -4    4.91    2.08
   5   1   4    4.02    2.51
  -5   1  -4    4.11    1.96
   6  -1   4    7.20    3.17
  -6  -1  -4    9.28    2.54
   6   1   4    4.13    3.42
  -6   1  -4   11.59    2.53
  -7  -1  -4   28.45    4.51
   7  -1   4   25.35    5.46
   7   1   4   18.79    4.85
  -7   1  -4   31.89    4.35
  -8  -1  -4   10.18    4.01
   8  -1   4    8.67    4.22
  -8   1  -4   12.69    3.81
   8   1   4   13.81    5.96
   8  -2  -4   14.12    7.12
  -8  -2   4   17.71    4.83
  -8  -2   4   20.90    4.30
  -8   2   4   17.23    3.67
   7  -2  -4   13.22    5.78
  -7  -2   4   30.36    5.87
  -7  -2   4   22.64    3.83
  -7   2   4   27.22    3.97
  -7   2   4   30.22    6.31
  -6  -2   4    5.75    3.41
  -6  -2   4    9.24    2.69
   6  -2  -4   -0.64    4.54
  -6   2   4    6.42    2.22
  -6   2   4    5.04    2.77
   6   2  -4    7.73    3.57
   6   2  -4    7.88    4.15
  -6   2   4    7.01    3.53
   5  -2  -4   17.92    2.95
   5  -2  -4   16.07    4.12
  -5  -2   4   17.54    3.22
   5   2  -4   12.84    3.72
  -5   2   4   19.58    3.15
   5   2  -4   17.26    2.36
  -5   2   4   15.89    2.84
  -5   2   4   18.30    2.88
   4  -2  -4   50.12    3.96
  -4  -2   4   56.12    4.61
   4  -2  -4   50.11    4.27
   4  -2  -4   53.26    5.90
   4  -2  -4   54.58    3.65
   4   2  -4   54.07    5.32
  -4   2   4   52.00    3.69
   4   2  -4   52.09    3.45
   4   2  -4   50.91    4.77
  -4   2   4   42.11    4.52
   4   2  -4   53.01    3.80
  -4   2   4   51.70    4.33
   3  -2  -4  159.46    9.53
   3  -2  -4  168.61    9.90
   3  -2  -4  172.99   10.89
  -3  -2   4  161.26   10.71
   3  -2  -4  162.37    7.86
  -3  -2   4  161.80    9.75
  -3   2   4  164.83    9.65
   3   2  -4  167.74   10.89
   3   2  -4  149.83    7.65
   3   2  -4  155.31    9.54
  -3   2   4  164.53    7.97
  -3   2   4  160.21   10.22
   3   2  -4  161.30    9.87
   2  -2  -4  278.08   16.55
   2  -2  -4  271.86   15.96
   2  -2  -4  293.62   13.18
  -2  -2   4  288.93   17.40
   2  -2  -4  283.08   17.17
  -2  -2   4  279.70   16.20
   2   2  -4  290.28   16.48
   2   2  -4  273.97   16.09
  -2   2   4  281.53   13.25
  -2   2   4  282.02   17.00
   2   2  -4  278.82   17.26
  -2   2   4  268.13   16.00
   1  -2  -4   68.26    4.90
  -1  -2   4   59.17    4.25
  -1  -2   4   64.30    4.30
  -1  -2   4   72.39    5.04
   1  -2  -4   57.66    4.03
   1  -2  -4   69.66    4.58
   1   2  -4   74.67    5.18
  -1   2   4   66.63    4.52
   1   2  -4   69.50    4.42
   1   2  -4   58.64    4.16
  -1   2   4   69.65    4.75
  -1   2   4   58.48    4.01
   0  -2  -4   39.99    3.18
   0  -2   4   49.03    3.79
   0  -2   4   35.61    3.40
   0  -2  -4   46.71    4.12
   0  -2   4   47.12    3.58
   0   2  -4   39.92    3.41
   0   2   4   42.03    3.26
   0   2  -4   49.94    3.27
   0   2   4   43.15    3.12
   0   2  -4   36.29    4.47
   0   2   4   42.06    4.00
   1  -2   4   13.01    2.42
   1  -2   4    8.79    1.37
   1  -2   4   10.63    2.13
  -1  -2  -4    9.60    1.69
   1  -2   4    8.16    1.23
  -1  -2  -4   12.41    1.85
  -1   2  -4    8.29    1.20
   1   2   4    9.71    1.28
   1   2   4   12.95    2.13
   1   2   4   12.82    2.44
  -1   2  -4   11.76    1.90
   2  -2   4   14.81    1.65
   2  -2   4   21.17    2.95
  -2  -2  -4   17.44    1.94
   2  -2   4   17.45    2.31
  -2  -2  -4   12.99    2.02
   2   2   4   14.26    1.70
   2   2   4   23.24    3.38
  -2   2  -4   14.35    2.15
   3  -2   4   44.34    4.12
   3  -2   4   50.39    2.73
   3  -2   4   55.51    3.67
   3  -2   4   46.68    3.03
  -3  -2  -4   47.26    4.35
  -3  -2  -4   46.43    2.92
   3   2   4   48.09    4.34
  -3   2  -4   51.38    3.15
   3   2   4   48.96    3.51
   3   2   4   52.57    2.97
   4  -2   4  100.97    6.24
  -4  -2  -4  105.08    5.26
   4  -2   4   94.01    6.85
   4  -2   4   92.94    6.53
  -4  -2  -4   89.97    7.35
   4   2   4   98.88    5.29
  -4   2  -4   97.15    6.22
   4   2   4   96.14    7.02
  -4   2  -4  104.28    5.30
  -5  -2  -4  103.12    8.89
  -5  -2  -4  110.00    5.92
   5  -2   4  107.90    7.76
   5  -2   4  100.18    7.48
  -5   2  -4  102.46    7.20
   5   2   4  113.77    8.13
  -5   2  -4  114.94    5.99
   6  -2   4   48.97    5.49
  -6  -2  -4   52.48    4.43
  -6   2  -4   55.59    4.35
   6   2   4   52.06    6.52
   7  -2   4   49.54    5.95
  -7  -2  -4   41.18    4.90
  -7   2  -4   45.03    4.75
   7   2   4   54.64    7.46
  -8  -2  -4    1.51    3.88
   8  -2   4    4.88    4.49
  -8   2  -4    3.47    3.10
   8   2   4    4.12    6.14
  -8  -3   4    9.99    4.42
  -8  -3   4    4.86    4.17
   8  -3  -4    3.45    7.05
  -8   3   4    9.80    3.44
  -7  -3   4    5.43    3.18
  -7  -3   4    8.14    3.92
  -7   3   4    3.70    2.91
  -6  -3   4  128.27    8.57
   6  -3  -4   90.67   10.58
  -6  -3   4   97.58    6.36
  -6   3   4  128.49    8.62
  -6   3   4  119.83    6.32
  -6   3   4  112.67    7.11
   5  -3  -4    0.79    3.11
   5  -3  -4   -1.87    3.71
  -5  -3   4    2.63    2.46
  -5   3   4    2.63    2.69
  -5   3   4    0.43    2.28
   5   3  -4    2.71    4.40
  -5   3   4    3.09    2.04
   5   3  -4   -0.01    2.04
   4  -3  -4  101.06    6.58
  -4  -3   4   94.22    7.25
  -4  -3   4  101.84    6.64
   4  -3  -4  105.38    5.48
   4  -3  -4   99.95    8.00
  -4   3   4  101.83    5.64
   4   3  -4   83.14    5.08
   4   3  -4  104.02    7.35
  -4   3   4  100.39    5.26
  -4   3   4  110.03    6.60
  -4   3   4   83.82    6.85
   3  -3  -4    1.72    1.15
  -3  -3   4    3.25    2.56
   3  -3  -4   -0.82    2.42
   3  -3  -4   -2.23    1.28
  -3  -3   4    1.27    1.59
   3  -3  -4    0.53    1.23
   3   3  -4    0.22    1.15
  -3   3   4   -1.21    1.46
  -3   3   4   -1.30    1.18
   3   3  -4    0.00    0.84
   3   3  -4    1.86    1.75
  -3   3   4   -0.34    1.47
   2  -3  -4   32.03    3.76
  -2  -3   4   32.07    3.03
   2  -3  -4   31.59    3.25
   2  -3  -4   25.16    2.39
  -2   3   4   22.95    2.50
   2   3  -4   35.62    3.06
  -2   3   4   29.57    2.96
   2   3  -4   27.47    2.68
  -2   3   4   31.86    2.88
   1  -3  -4    1.14    2.21
   1  -3  -4   -2.01    1.60
  -1  -3   4    1.41    1.49
  -1  -3   4   -1.24    1.25
   1  -3  -4    0.10    1.38
  -1  -3   4    1.69    2.08
   1  -3  -4   -0.29    1.12
  -1   3   4   -2.86    1.80
  -1   3   4    1.23    1.11
   1   3  -4    2.23    1.83
  -1   3   4    0.85    1.22
  -1   3   4    1.84    0.91
   1   3  -4    1.01    1.32
   0  -3  -4  415.87   23.28
   0  -3  -4  380.28   23.58
   0  -3   4  416.08   23.07
   0  -3   4  406.95   22.62
   0  -3   4  404.01   28.90
   0  -3   4  381.73   18.35
   0   3   4  346.94   28.67
   0   3  -4  347.58   29.03
   0   3  -4  430.30   22.97
   0   3  -4  404.28   22.66
   0   3   4  394.33   23.55
   0   3   4  443.51   23.33
  -1  -3  -4    4.04    1.30
   1  -3   4    7.51    1.16
   1  -3   4    4.23    2.10
   1  -3   4    6.78    1.72
  -1  -3  -4    5.50    1.97
   1  -3   4    5.31    1.46
   1  -3   4    4.84    1.04
  -1   3  -4    7.00    1.39
  -1   3  -4    5.90    1.47
  -1   3  -4    1.75    2.63
   1   3   4    6.10    0.91
   1   3   4    8.00    2.62
  -2  -3  -4  512.07   31.58
   2  -3   4  531.49   31.07
  -2  -3  -4  555.94   24.10
   2  -3   4  506.21   38.72
   2  -3   4  585.49   31.53
  -2  -3  -4  536.32   31.05
   2  -3   4  557.90   24.90
   2  -3   4  524.53   24.19
   2   3   4  513.98   24.07
   2   3   4  555.59   31.20
   2   3   4  498.80   30.31
  -2   3  -4  555.03   24.26
   3  -3   4    9.28    1.47
  -3  -3  -4    7.63    1.21
   3  -3   4    9.57    1.57
  -3  -3  -4   10.50    2.02
   3  -3   4    4.90    1.66
   3  -3   4    5.90    1.94
   3   3   4    7.17    2.15
   3   3   4    7.59    1.43
   3   3   4    8.75    1.36
  -3   3  -4    9.41    1.57
   4  -3   4   79.93    5.60
   4  -3   4   69.19    5.07
  -4  -3  -4   64.68    4.01
  -4  -3  -4   63.32    6.58
   4  -3   4   80.12    5.56
   4   3   4   80.27    5.90
  -4   3  -4   68.80    4.87
   4   3   4   66.00    4.23
  -4   3  -4   69.63    4.26
  -5  -3  -4    3.06    4.39
   5  -3   4    6.75    2.66
   5  -3   4    5.58    2.61
  -5  -3  -4    5.76    2.21
  -5   3  -4    9.59    2.10
   5   3   4    3.02    3.21
  -5   3  -4    8.15    2.19
   6  -3   4   13.70    3.17
   6  -3   4    7.41    3.12
  -6  -3  -4   15.72    2.64
   6   3   4   11.91    4.26
  -6   3  -4   17.25    2.69
   7  -3   4    1.93    3.39
  -7  -3  -4    0.67    2.99
  -7   3  -4    2.31    2.36
   7   3   4    6.44    4.89
   8  -3   4   73.01    7.73
  -8  -3  -4   74.58    6.76
  -8   3  -4   70.48    6.06
   8   3   4   63.43   10.62
  -8  -4   4    8.90    4.34
  -8  -4   4    3.74    4.06
   8  -4  -4   -7.96    7.19
   8   4  -4    8.14    6.73
  -8   4   4    1.75    3.19
  -7  -4   4   28.91    3.85
  -7  -4   4   28.03    5.15
  -7   4   4   28.61    4.09
   6  -4  -4   -6.98    4.67
  -6  -4   4    1.64    2.74
  -6  -4   4    2.72    3.05
  -6   4   4    3.68    2.23
  -6   4   4   -0.15    3.01
  -6   4   4    1.96    3.71
   5  -4  -4   -1.71    3.03
  -5  -4   4   -2.03    2.32
   5  -4  -4   -0.26    3.80
  -5   4   4    0.24    2.30
   5   4  -4    1.07    4.42
  -5   4   4    3.42    2.55
   5   4  -4   -1.37    1.98
  -5   4   4    0.77    2.63
   4  -4  -4    1.13    1.60
   4  -4  -4    1.12    2.23
   4  -4  -4    1.43    2.99
  -4  -4   4    3.43    2.06
  -4   4   4    2.77    1.91
   4   4  -4    2.38    2.89
   4   4  -4    2.90    1.33
  -4   4   4    2.95    1.95
  -4   4   4    2.27    1.73
  -3  -4   4  171.77   10.46
  -3  -4   4  166.40   11.35
   3  -4  -4  167.55   10.46
   3  -4  -4  173.87    8.43
   3  -4  -4  173.30   11.36
   3  -4  -4  174.88   10.18
  -3   4   4  171.81   10.83
  -3   4   4  188.21   10.24
   3   4  -4  177.60   10.28
  -3   4   4  172.87    8.58
   3   4  -4  172.25   10.63
   2  -4  -4   70.34    4.45
  -2  -4   4   68.16    5.50
   2  -4  -4   71.31    6.15
  -2  -4   4   52.62    4.47
   2  -4  -4   59.14    3.97
   2  -4  -4   63.74    5.36
  -2   4   4   61.27    4.08
  -2   4   4   56.91    4.56
   2   4  -4   58.31    4.17
   2   4  -4   68.44    4.41
  -2   4   4   61.73    4.02
   1  -4  -4  536.43   39.23
   1  -4  -4  525.09   32.00
  -1  -4   4  531.40   31.01
   1  -4  -4  572.36   31.29
  -1  -4   4  533.99   30.53
  -1  -4   4  551.18   32.09
  -1   4   4  538.57   25.10
  -1   4   4  539.08   31.30
  -1   4   4  522.01   30.27
   1   4  -4  552.06   39.60
  -1   4   4  530.04   31.95
   1   4  -4  526.34   30.49
   1   4  -4  557.98   31.12
   0  -4   4    5.22    0.91
   0  -4   4    3.93    1.57
   0  -4  -4   10.76    2.52
   0  -4  -4    6.64    1.78
   0  -4   4    5.46    1.46
   0  -4   4    8.62    3.08
   0   4   4    5.45    2.41
   0   4   4    4.83    2.52
   0   4  -4    5.12    1.61
   0   4   4    6.09    1.35
   0   4  -4    7.85    1.29
   0   4  -4   10.33    1.54
   1  -4   4   16.40    3.72
  -1  -4  -4   23.68    3.79
  -1  -4  -4   13.91    2.66
   1  -4   4   15.69    2.30
  -1   4  -4   14.58    4.08
   1   4   4   24.59    4.37
  -1   4  -4   13.02    2.28
   1   4   4   11.76    3.25
   2  -4   4    2.02    1.64
   2  -4   4    1.24    0.90
   2  -4   4    1.53    0.94
   2  -4   4    1.44    1.33
  -2  -4  -4    1.56    0.94
  -2  -4  -4    3.92    1.52
  -2  -4  -4    1.18    1.47
   2  -4   4    3.51    2.28
   2   4   4    2.50    0.92
   2   4   4    3.33    2.33
  -2   4  -4    1.70    1.41
   2   4   4    0.66    1.34
   3  -4   4   88.62    4.58
  -3  -4  -4   75.64    5.71
   3  -4   4   79.86    5.93
   3  -4   4   94.35    4.33
  -3  -4  -4   89.41    4.43
   3  -4   4   80.54    7.50
   3  -4   4   88.90    5.94
  -3   4  -4   94.00    4.59
   3   4   4   82.89    5.54
   3   4   4   84.43    6.20
   3   4   4   89.99    4.46
   4  -4   4    5.56    2.45
   4  -4   4    7.74    2.35
  -4  -4  -4    2.01    3.24
   4  -4   4    5.94    1.97
  -4  -4  -4    4.55    1.64
  -4   4  -4    7.49    1.82
   4   4   4    2.69    2.71
   5  -4   4  163.32   10.85
  -5  -4  -4  168.47    8.37
   5  -4   4  168.75   11.11
   5   4   4  166.20   11.28
  -5   4  -4  175.74    8.51
  -5   4  -4  155.50   10.61
   6  -4   4   24.89    4.64
  -6  -4  -4   22.25    3.06
   6  -4   4   19.92    3.82
   6   4   4   27.02    4.74
  -6   4  -4   25.11    3.51
  -7  -4  -4   33.32    4.75
   7  -4   4   31.36    5.69
  -7   4  -4   36.34    4.02
   7   4   4   44.44    8.14
  -8  -4  -4    5.86    4.08
   8   4   4    3.80    7.27
  -8  -5   4   10.78    4.61
   8  -5  -4    1.07    8.05
   8   5  -4   10.85    7.92
   7  -5  -4   18.32    6.78
  -7  -5   4   35.62    4.88
  -7  -5   4   33.20    5.20
  -7   5   4   28.09    4.42
  -7   5   4   42.16    6.08
  -6  -5   4   72.10    6.18
  -6  -5   4   65.11    5.11
   6  -5  -4   56.78    8.96
  -6   5   4   68.39    6.02
  -6   5   4   73.89    5.16
   5  -5  -4   43.79    6.97
  -5  -5   4   42.49    4.52
   5  -5  -4   33.15    4.98
  -5   5   4   33.68    3.78
  -5   5   4   44.43    4.65
   5   5  -4   32.39    6.85
  -5   5   4   40.54    4.80
   5   5  -4   34.37    3.46
   4  -5  -4   25.88    5.25
   4  -5  -4   22.96    3.41
  -4  -5   4   24.60    3.57
  -4   5   4   27.59    3.38
  -4   5   4   26.67    3.10
  -4   5   4   28.06    3.26
   4   5  -4   23.89    4.31
   4   5  -4   24.63    2.29
   3  -5  -4   36.30    2.97
  -3  -5   4   33.94    4.01
  -3  -5   4   35.97    3.53
   3  -5  -4   38.75    3.08
   3  -5  -4   36.58    4.55
   3  -5  -4   35.22    2.48
  -3   5   4   36.79    2.91
   3   5  -4   33.28    2.88
  -3   5   4   39.56    3.16
  -3   5   4   40.18    3.33
  -3   5   4   37.07    3.32
   3   5  -4   33.71    3.58
  -2  -5   4   18.91    3.45
  -2  -5   4   21.80    2.77
   2  -5  -4   19.42    2.02
   2  -5  -4   21.14    2.48
   2  -5  -4   23.12    3.43
   2  -5  -4   24.24    3.75
   2   5  -4   19.76    2.65
   2   5  -4   19.39    2.36
  -2   5   4   22.47    2.78
  -2   5   4   19.31    2.37
  -2   5   4   18.57    1.97
   1  -5  -4   21.36    3.08
   1  -5  -4   19.73    4.52
  -1  -5   4   23.72    2.56
   1  -5  -4   18.44    2.92
  -1  -5   4   16.78    1.87
   1   5  -4   20.79    1.52
   1   5  -4   23.60    5.27
  -1   5   4   22.41    2.60
  -1   5   4   19.44    1.65
   1   5  -4   26.00    2.12
  -1   5   4   17.71    3.17
   1   5  -4   18.20    2.41
  -1   5   4   22.11    2.31
   0  -5   4  148.94    8.93
   0  -5  -4  156.66    9.64
   0  -5  -4  136.84    9.49
   0  -5   4  156.25    7.16
   0  -5   4  148.25    7.16
   0  -5   4  146.15    9.02
   0  -5   4  137.72   12.13
   0   5  -4  160.87    9.13
   0   5   4  157.03    9.33
   0   5   4  144.45   11.93
   0   5   4  148.06    9.45
   0   5  -4  153.21    7.21
   1  -5   4  182.74   11.08
   1  -5   4  195.20   14.26
   1  -5   4  189.57    8.69
   1  -5   4  187.23   11.13
  -1  -5  -4  191.01   11.56
  -1  -5  -4  188.42   11.52
   1  -5   4  195.94    8.91
  -1   5  -4  153.00   14.96
   1   5   4  175.20    8.41
   1   5   4  166.08   10.76
   1   5   4  196.69   11.86
  -1   5  -4  201.63    9.04
   1   5   4  193.60   14.51
  -1   5  -4  184.77    8.75
  -2  -5  -4  103.68    4.92
   2  -5   4  106.55    6.81
   2  -5   4   97.82    8.39
   2  -5   4   95.12    6.66
  -2  -5  -4   95.78    6.64
   2  -5   4  106.13    5.20
   2  -5   4  106.47    5.07
  -2  -5  -4  105.07    6.93
  -2   5  -4  107.87    5.29
   2   5   4  104.53    6.45
  -2   5  -4  104.46    5.44
   2   5   4   99.88    7.43
   2   5   4  105.12    4.92
   2   5   4   98.59    9.68
   3  -5   4   77.09    4.36
  -3  -5  -4   86.98    6.18
   3  -5   4   95.96    7.67
   3  -5   4   93.71    6.25
  -3  -5  -4   78.24    4.38
   3  -5   4   88.59    4.56
   3  -5   4   92.94    6.03
   3   5   4   71.56    5.65
   3   5   4   99.43    6.46
  -3   5  -4   89.00    4.75
   4  -5   4   34.17    4.53
  -4  -5  -4   33.97    2.79
   4  -5   4   36.15    4.37
  -4  -5  -4   35.48    6.12
   4  -5   4   36.71    4.15
   4   5   4   35.26    4.75
  -4   5  -4   33.73    3.16
  -5  -5  -4    8.01    2.38
  -5  -5  -4    0.83    4.69
   5  -5   4   13.30    2.95
   5  -5   4    9.88    3.21
   5   5   4   13.87    3.66
  -5   5  -4   12.05    2.05
  -6  -5  -4   -4.45    2.53
   6  -5   4    3.22    3.90
   6  -5   4    1.31    2.56
  -6   5  -4    4.46    2.30
   6   5   4   -1.16    4.21
  -7  -5  -4   18.38    3.38
   7  -5   4   15.92    3.70
  -7   5  -4   17.91    3.03
   7   5   4   20.06    5.98
  -7  -6   4    3.54    3.99
  -7  -6   4    3.81    3.48
   7  -6  -4   -1.35    7.07
  -7   6   4    2.72    4.13
   7   6  -4    3.95    5.82
  -7   6   4    2.68    3.39
   6  -6  -4    4.61    5.21
  -6  -6   4    7.23    2.84
  -6  -6   4    8.88    3.30
  -6   6   4    8.21    3.56
  -6   6   4   11.62    3.12
   5  -6  -4    2.81    3.27
  -5  -6   4    0.60    2.98
   5  -6  -4    1.89    3.99
  -5   6   4    2.89    2.57
   5   6  -4    1.61    1.98
  -5   6   4    3.27    2.85
   5   6  -4    4.12    4.71
  -4  -6   4   80.71    6.02
   4  -6  -4   77.61    5.55
   4  -6  -4   83.17    7.36
  -4   6   4   81.86    4.89
   4   6  -4   76.46    4.18
  -4   6   4   86.60    5.37
   4   6  -4   74.05    6.35
   3  -6  -4   11.67    1.99
   3  -6  -4   12.57    1.57
   3  -6  -4    9.12    1.75
   3  -6  -4    8.45    2.32
  -3  -6   4   10.62    2.14
   3  -6  -4    8.03    3.01
   3   6  -4    7.47    2.21
  -3   6   4    9.46    1.66
  -3   6   4   10.04    2.08
  -3   6   4    8.52    1.87
   3   6  -4   10.48    1.80
  -3   6   4   10.31    1.87
   2  -6  -4  542.15   39.22
  -2  -6   4  544.05   30.53
   2  -6  -4  542.33   31.18
  -2  -6   4  493.39   31.92
   2  -6  -4  540.90   32.07
  -2   6   4  559.32   24.25
  -2   6   4  536.53   30.05
   2   6  -4  571.01   39.96
  -2   6   4  529.55   31.91
  -2   6   4  546.79   25.05
   2   6  -4  497.64   30.39
   1  -6  -4   24.43    4.54
   1  -6  -4   20.52    3.52
  -1  -6   4   23.83    2.76
   1  -6  -4   19.38    3.04
  -1   6   4   25.80    2.24
  -1   6   4   19.86    3.09
   1   6  -4   16.79    4.97
   1   6  -4   23.91    2.52
   1   6  -4   18.90    1.75
  -1   6   4   19.27    2.54
   0  -6   4  126.04    6.20
   0  -6  -4  127.99    8.46
   0  -6   4  129.66    6.18
   0  -6  -4  133.00    8.34
   0  -6   4  122.11    7.72
   0  -6   4  131.04    7.71
   0  -6  -4  112.78   11.00
   0  -6   4  128.04   10.57
   0   6   4  137.00   10.53
   0   6   4  136.55    8.16
   0   6  -4  121.49    7.88
   0   6  -4  114.31   11.29
   0   6   4  131.97    8.01
   0   6  -4  127.67    6.26
   0   6   4  117.26    7.36
   1  -6   4   12.49    2.36
  -1  -6  -4    7.76    2.71
   1  -6   4   13.09    1.55
   1  -6   4   15.51    1.73
  -1  -6  -4   10.61    2.09
   1  -6   4   15.33    3.61
   1  -6   4   12.23    2.61
   1   6   4   15.04    2.81
  -1   6  -4   16.67    2.13
   1   6   4   12.51    3.54
  -1   6  -4    8.93    4.48
   1   6   4   13.75    2.29
   2  -6   4    3.83    1.71
   2  -6   4    2.86    1.59
   2  -6   4    2.92    1.80
   2   6   4    4.09    2.65
   2   6   4   10.82    3.83
  -2   6  -4    4.22    1.62
   3  -6   4   19.33    2.75
  -3  -6  -4   16.04    3.06
   3  -6   4   28.02    4.96
   3  -6   4   19.83    3.16
   3  -6   4   21.50    1.92
  -3  -6  -4   17.35    2.07
  -3   6  -4   23.78    3.09
   3   6   4   18.14    5.53
   3   6   4   18.49    3.46
  -3   6  -4   21.16    2.33
   3   6   4   19.04    2.63
  -4  -6  -4  127.46    6.67
   4  -6   4  134.05    9.52
   4  -6   4  138.96    9.06
  -4   6  -4  143.19    7.06
   4   6   4  130.52    9.38
  -5  -6  -4   13.70    2.43
   5  -6   4   14.73    3.24
  -5  -6  -4    1.42    5.46
   5  -6   4   12.35    3.73
   5   6   4   11.00    3.78
  -5   6  -4   16.83    2.51
   6  -6   4   73.20    8.11
   6  -6   4   81.85    6.87
  -6  -6  -4   72.81    5.37
   6   6   4   58.26    8.51
  -6   6  -4   81.40    5.21
  -7  -6  -4    2.96    3.51
   7  -6   4    7.87    4.03
  -7   6  -4    7.91    2.99
   7   6   4    1.38    5.94
   7  -7  -4   36.18    8.74
  -7  -7   4   44.90    5.97
  -7  -7   4   47.19    6.10
  -7   7   4   49.45    5.19
  -7   7   4   58.44    7.07
   6  -7  -4    5.83    5.49
  -6  -7   4    1.72    3.23
  -6  -7   4    1.39    3.18
  -6   7   4    3.45    3.16
  -6   7   4    5.29    3.23
   6   7  -4    5.95    4.01
   5  -7  -4  112.15    8.07
   5  -7  -4  110.40   10.24
  -5  -7   4  109.63    8.07
  -5   7   4  116.48    6.96
   5   7  -4  117.12    8.46
  -5   7   4  120.27    6.69
   4  -7  -4    4.80    2.07
  -4  -7   4    2.45    2.46
   4  -7  -4    5.52    3.46
  -4   7   4    7.53    2.32
   4   7  -4    1.90    3.15
  -4   7   4    6.15    2.58
  -3  -7   4   67.79    5.20
   3  -7  -4   69.51    4.33
   3  -7  -4   67.19    6.13
  -3   7   4   70.51    4.32
   3   7  -4   64.61    5.05
   3   7  -4   78.50   11.31
  -3   7   4   65.70    4.71
   2  -7  -4    2.86    2.10
   2  -7  -4    8.26    3.15
   2  -7  -4    5.35    1.79
  -2  -7   4    3.00    2.01
   2   7  -4    1.41    1.74
   2   7  -4    5.64    5.50
  -2   7   4    2.21    1.73
  -2   7   4    4.87    1.54
  -2   7   4    1.92    1.36
   2   7  -4    4.45    0.98
   1  -7  -4   44.54    4.44
   1  -7  -4   43.91    5.55
  -1  -7   4   46.98    3.62
   1  -7  -4   42.09    3.93
  -1   7   4   41.54    2.61
  -1   7   4   39.82    5.81
   1   7  -4   43.05    2.70
  -1   7   4   42.49    3.32
   1   7  -4   44.44    3.61
  -1   7   4   46.07    3.28
   1   7  -4   37.30    7.27
  -1   7   4   41.95    3.97
   0  -7  -4    4.92    3.75
   0  -7  -4   -2.72    2.40
   0  -7   4    1.22    1.45
   0  -7   4   -0.15    1.29
   0  -7   4    0.79    1.58
   0  -7   4   -4.77    2.67
   0  -7   4    2.79    1.57
   0  -7  -4   -0.43    2.03
   0   7  -4    0.80    2.13
   0   7   4    3.46    2.29
   0   7  -4    1.01    1.29
   0   7  -4   -0.42    4.06
   0   7   4   -1.44    3.02
   0   7   4    0.74    1.11
  -1  -7  -4  264.94   16.07
   1  -7   4  276.12   12.42
  -1  -7  -4  226.96   15.95
   1  -7   4  263.57   19.59
   1  -7   4  268.66   15.36
  -1  -7  -4  230.70   20.53
   1  -7   4  266.74   12.05
   1  -7   4  267.89   15.14
   1   7   4  273.09   15.79
   1   7   4  252.25   15.01
  -1   7  -4  271.94   12.48
   1   7   4  264.48   19.93
   2  -7   4    8.19    1.36
   2  -7   4    4.19    1.86
   2  -7   4    8.26    1.32
   2  -7   4    6.13    2.17
  -2  -7  -4    8.21    2.13
   2  -7   4    7.71    1.95
  -2  -7  -4    6.41    2.71
   2   7   4   11.63    4.37
   2   7   4    3.97    2.32
   2   7   4    7.52    3.35
  -2   7  -4    7.98    1.89
  -2   7  -4    5.37    1.68
  -3  -7  -4  177.42    8.75
   3  -7   4  204.07   12.15
   3  -7   4  190.80   11.65
  -3  -7  -4  171.19   11.88
   3   7   4  199.64   16.59
  -3   7  -4  194.59    9.20
   3   7   4  183.96   11.73
   3   7   4  186.53   12.38
  -3   7  -4  187.51    9.47
   4  -7   4    0.25    2.92
   4  -7   4    1.39    2.76
  -4  -7  -4    0.27    1.68
   4   7   4   -6.25    7.31
  -4   7  -4    0.64    2.23
   4   7   4    2.23    3.86
  -4   7  -4    2.37    2.11
   5  -7   4    1.08    4.01
   5  -7   4    0.64    2.69
  -5  -7  -4    2.91    2.19
   5   7   4    5.07    4.50
  -5   7  -4    4.90    2.38
   6  -7   4    3.92    3.73
   6  -7   4    3.24    4.58
  -6  -7  -4    4.01    2.93
  -6   7  -4    1.91    2.67
   6   7   4   -0.18    4.76
  -7  -7  -4   17.39    3.90
   7  -7   4   18.89    5.03
  -7   7  -4   22.01    3.15
   7   7   4   19.11    6.63
  -7  -8   4   16.97    4.26
  -7  -8   4   15.87    4.27
   7  -8  -4    3.61    7.46
  -7   8   4   15.39    4.53
  -7   8   4   14.67    4.95
  -6  -8   4   -0.36    3.91
  -6  -8   4    4.34    3.31
   6  -8  -4   -0.93    5.67
  -6   8   4    3.78    3.50
  -6   8   4    7.31    3.32
   5  -8  -4   -0.81    4.41
  -5  -8   4   -2.97    3.21
  -5   8   4    2.73    2.89
  -5   8   4    1.40    2.70
   5   8  -4   -2.68    3.04
   4  -8  -4   47.45    6.54
   4  -8  -4   55.03    4.02
  -4  -8   4   54.00    4.98
  -4   8   4   59.10    4.38
   4   8  -4   34.65    5.32
   4   8  -4   41.84    4.34
  -4   8   4   53.71    4.15
   4   8  -4   48.57   11.25
   3  -8  -4   59.13    5.47
  -3  -8   4   62.40    5.27
  -3   8   4   54.62    4.24
   3   8  -4   70.15   10.47
   3   8  -4   54.30    3.28
  -3   8   4   59.08    3.88
   2  -8  -4  157.51   10.78
  -2  -8   4  179.78   10.43
   2  -8  -4  165.24   11.00
  -2   8   4  174.41    8.63
  -2   8   4  181.84    8.14
   2   8  -4  152.93    8.07
   2   8  -4  170.45   14.98
  -1  -8   4   48.13    4.20
  -1  -8   4   45.17    3.97
   1  -8  -4   57.89    5.09
   1  -8  -4   67.74    6.73
   1  -8  -4   55.67    5.31
  -1   8   4   62.08    4.94
   1   8  -4   46.79    4.57
   1   8  -4   52.47    3.28
   1   8  -4   63.17    8.41
  -1   8   4   50.36    3.02
  -1   8   4   59.30    6.95
  -1   8   4   52.21    3.92
   0  -8   4   74.32    5.01
   0  -8   4   61.13    7.04
   0  -8  -4   77.10    5.99
   0  -8   4   70.18    4.89
   0  -8   4   73.08    4.33
   0  -8  -4   76.71    8.34
   0  -8  -4   72.70    6.91
   0  -8   4   82.21    4.36
   0   8   4   72.36    4.85
   0   8  -4   66.04    5.85
   0   8   4   81.69    5.63
   0   8   4   81.06    8.25
   0   8  -4   77.70    4.30
   0   8  -4   68.86    8.95
   0   8   4   71.01    4.60
   1  -8   4    8.32    1.99
  -1  -8  -4    6.69    3.97
   1  -8   4   14.20    2.63
   1  -8   4   14.68    3.84
   1  -8   4   11.87    2.48
  -1  -8  -4    9.71    2.42
  -1  -8  -4   -3.85    5.97
   1  -8   4    9.15    1.97
   1  -8   4   17.71    2.55
  -1   8  -4    4.08    5.33
   1   8   4   16.42    4.01
  -1   8  -4   11.74    1.89
   1   8   4   16.14    2.93
   1   8   4   11.09    1.98
   2  -8   4    1.00    2.43
  -2  -8  -4    3.37    2.91
   2  -8   4    0.33    2.02
   2  -8   4    1.37    1.35
   2  -8   4    4.74    1.97
   2  -8   4    1.72    1.96
  -2  -8  -4    3.48    2.35
   2   8   4    5.52    3.74
   2   8   4    5.84    4.73
  -2   8  -4   -1.18    1.75
   2   8   4    2.85    2.39
  -2   8  -4    1.48    1.92
   3  -8   4   20.86    3.38
   3  -8   4   23.49    3.57
  -3  -8  -4   17.95    3.14
   3  -8   4   19.47    3.99
  -3  -8  -4   27.03    5.02
   3   8   4   13.99    4.64
   3   8   4   21.89    3.40
  -3   8  -4   24.40    3.04
   3   8   4   14.19    7.09
  -3   8  -4   19.78    3.23
   4  -8   4   76.04    7.15
   4  -8   4   64.85    6.23
  -4  -8  -4   66.83    4.02
   4   8   4   59.35    7.49
  -4   8  -4   68.96    5.13
   4   8   4   70.53   11.15
  -4   8  -4   81.06    4.84
  -5  -8  -4   29.12    3.56
   5  -8   4   28.41    4.91
   5  -8   4   36.52    5.48
  -5   8  -4   33.72    3.99
   5   8   4   26.62    5.51
   5   8   4   27.63    9.47
  -6  -8  -4   61.92    5.09
   6  -8   4   67.67    7.35
   6   8   4   48.78    9.19
  -6   8  -4   65.34    5.27
   7  -8   4   12.28    5.30
   7   8   4    7.88    7.92
  -7   8  -4   10.19    3.57
  -7  -9   4    7.54    4.50
   7  -9  -4    4.89    8.40
  -7   9   4    3.67    4.72
  -7   9   4   10.12    4.47
  -6  -9   4   52.94    6.58
   6  -9  -4   55.68   10.35
  -6  -9   4   54.01    5.54
  -6   9   4   62.46    5.93
  -6   9   4   56.92    5.97
   5  -9  -4   27.26    5.41
  -5  -9   4   36.43    5.77
  -5   9   4   33.10    4.90
  -5   9   4   30.18    4.42
   5   9  -4   12.25   10.68
  -4  -9   4   60.68    6.05
   4  -9  -4   55.91    7.27
  -4   9   4   63.06    5.22
   4   9  -4   64.40   11.27
  -4   9   4   64.07    4.58
  -3  -9   4   20.32    4.30
   3  -9  -4   18.50    3.20
   3   9  -4   22.87    8.42
   3   9  -4   22.84    2.50
  -3   9   4   21.43    3.36
  -3   9   4   23.53    3.16
  -2  -9   4    1.48    2.43
   2  -9  -4    5.98    3.53
   2  -9  -4    2.01    2.64
   2   9  -4    4.74    3.21
   2   9  -4    3.01    6.70
  -2   9   4    3.01    2.04
  -2   9   4    1.48    1.70
   2   9  -4    5.90    1.63
  -1  -9   4    8.20    2.19
   1  -9  -4    3.34    2.60
  -1  -9   4    2.42    2.40
   1  -9  -4    3.38    3.72
   1   9  -4    7.27    1.64
   1   9  -4    4.24    2.79
  -1   9   4    2.70    3.78
  -1   9   4    1.34    2.42
   1   9  -4    4.13    4.68
  -1   9   4    3.78    1.38
   0  -9   4  109.31    5.99
   0  -9   4  110.09    7.09
   0  -9   4  115.62    6.25
   0  -9  -4   96.65    9.30
   0  -9  -4  110.26   11.17
   0  -9  -4  109.02    8.20
   0   9   4  118.73    6.63
   0   9   4  117.92    7.71
   0   9   4  118.79   10.64
   0   9  -4   96.74    8.40
   0   9  -4  113.42    5.95
   0   9  -4  118.72   11.78
   1  -9   4   69.74    4.33
   1  -9   4   73.42    4.73
   1  -9   4   56.93    4.63
   1  -9   4   61.63    5.87
  -1  -9  -4   63.06    5.74
   1  -9   4   62.74    4.55
  -1   9  -4   39.36    9.88
  -1   9  -4   70.15    4.39
   1   9   4   64.96    5.09
   1   9   4   54.30    7.97
   1   9   4   55.42    5.61
  -2  -9  -4  195.75   13.18
  -2  -9  -4  208.29   13.65
   2  -9   4  214.20   12.81
   2  -9   4  210.21   12.55
   2  -9   4  221.44   13.74
  -2   9  -4  223.35   10.70
   2   9   4  194.14   12.77
  -2   9  -4  208.16   10.27
   2   9   4  219.10   13.51
   2   9   4  215.96   17.94
   3  -9   4   18.81    3.81
   3  -9   4   18.21    3.09
  -3  -9  -4   12.79    3.93
   3  -9   4   21.22    3.84
  -3  -9  -4   18.04    3.46
  -3   9  -4   19.90    2.60
   3   9   4   13.56    4.97
  -3   9  -4   19.02    2.89
   3   9   4   21.58    6.85
   4  -9   4   20.47    4.07
  -4  -9  -4   19.22    2.76
   4  -9   4   17.46    3.95
   4  -9   4   25.30    4.67
   4  -9   4   15.90    3.66
   4   9   4   32.33    8.32
  -4   9  -4   26.55    3.67
   4   9   4   14.11    5.17
  -4   9  -4   18.46    2.72
   5  -9   4    4.56    3.66
   5  -9   4   -4.82    4.97
  -5  -9  -4   -0.17    2.48
   5   9   4   11.48    8.64
   5   9   4   -4.66    5.87
  -5   9  -4   -0.76    2.85
   6  -9   4   10.88    4.66
   6   9   4    1.70   10.43
   6   9   4    9.03    6.75
  -6   9  -4   14.39    3.53
  -6 -10   4    0.56    4.04
  -6 -10   4   -4.63    3.56
   6 -10  -4   -5.26    6.75
  -6  10   4   -5.66    4.05
  -6  10   4    0.70    4.29
   6  10  -4   -9.45    8.46
   5 -10  -4    3.52    5.15
  -5 -10   4    1.72    3.44
  -5  10   4    5.94    3.71
  -5  10   4    7.40    3.47
   5  10  -4   -1.91    8.83
  -4 -10   4    0.90    2.98
   4 -10  -4   -0.59    3.81
   4  10  -4   -9.71    8.39
  -4  10   4    2.63    2.50
  -4  10   4    1.80    2.93
   3 -10  -4  101.69    8.05
  -3 -10   4   98.23    7.39
  -3  10   4   94.41    5.95
   3  10  -4   95.65   13.61
  -3  10   4  102.81    5.69
   3  10  -4   91.47    5.38
  -2 -10   4    0.44    2.96
   2 -10  -4    3.22    2.75
  -2 -10   4    3.82    2.67
  -2  10   4    4.26    2.32
   2  10  -4   10.31    6.19
  -2  10   4    2.55    1.94
   2  10  -4    3.85    1.75
   1 -10  -4   96.99    8.96
  -1 -10   4  101.65    6.02
  -1 -10   4  104.15    7.06
   1 -10  -4  104.99    7.83
   1  10  -4   88.84    7.69
  -1  10   4  113.29   10.82
   1  10  -4  107.86   11.21
  -1  10   4  113.02    6.46
   1  10  -4  110.83    5.84
  -1  10   4  100.69    5.11
   0 -10   4    2.46    2.10
   0 -10   4    0.62    2.48
   0 -10  -4   -3.35    2.76
   0 -10  -4   -3.43    5.19
   0  10   4    0.56    2.88
   0  10  -4    0.63    2.14
   0  10  -4   -5.76    4.16
   0  10   4   -1.43    4.69
   0  10   4   -7.45    2.67
   0  10  -4    1.95    6.04
   1 -10   4   32.41    5.12
  -1 -10  -4   27.20    4.84
   1 -10   4   31.52    3.53
  -1 -10  -4   33.69    6.51
   1 -10   4   27.07    4.10
   1 -10   4   24.09    3.50
   1 -10   4   27.06    3.83
   1  10   4   27.25    4.28
   1  10   4   31.56    7.61
   1  10   4   34.29    4.62
   1  10   4   26.25    4.21
  -1  10  -4   28.70    7.63
  -1  10  -4   29.59    4.10
   2 -10   4    1.54    2.47
  -2 -10  -4   -1.05    3.62
  -2 -10  -4   -2.89    2.86
   2 -10   4    1.18    3.50
   2 -10   4    0.73    2.15
   2  10   4    1.71    5.75
  -2  10  -4    0.09    2.36
  -2  10  -4    2.57    2.54
   2  10   4    2.04    4.11
   2  10   4   -1.89    3.43
  -2  10  -4   -2.68    7.42
   3 -10   4   47.53    6.68
   3 -10   4   41.45    5.04
  -3 -10  -4   45.34    6.02
   3 -10   4   48.78    4.79
   3  10   4   39.88    7.37
  -3  10  -4   51.34    4.39
   3  10   4   45.03   10.15
  -3  10  -4   49.09    4.80
   4 -10   4    4.23    4.38
   4 -10   4    2.10    3.29
  -4 -10  -4    1.81    3.68
   4 -10   4   -1.02    3.60
  -4  10  -4    6.38    2.54
   4  10   4   -3.64    5.78
  -4  10  -4    0.23    2.65
   4  10   4   13.40    8.38
   5 -10   4  119.34    9.13
   5 -10   4   81.90   11.34
   5 -10   4  106.61    8.94
  -5  10  -4  122.15    6.93
   5  10   4   77.18   10.50
  -5  10  -4  104.66    6.90
   5  10   4   96.90   15.12
   6 -10   4    4.89    5.11
  -6  10  -4    2.73    3.32
   6  10   4   21.23   11.42
  -6 -11   4   57.74    8.52
   6 -11  -4   45.90    8.65
   6  11  -4   43.59   12.01
  -6  11   4   58.77    6.50
  -6  11   4   65.33    7.52
   5 -11  -4   19.10    5.82
  -5 -11   4   18.21    4.17
  -5  11   4   20.04    4.25
   5  11  -4   15.07    9.68
  -5  11   4   20.33    3.37
  -4 -11   4   48.04    6.07
   4 -11  -4   37.03    7.19
  -4  11   4   47.56    4.60
   4  11  -4   36.59   10.02
  -4  11   4   43.72    4.43
  -3 -11   4    6.36    3.19
   3 -11  -4    0.70    3.23
   3  11  -4    9.11    2.07
  -3  11   4   10.28    2.94
   3  11  -4   23.81    8.29
  -3  11   4    9.35    2.49
  -2 -11   4    0.20    2.69
  -2 -11   4    1.84    3.37
   2 -11  -4   -1.59    2.99
  -2  11   4   -0.01    1.94
   2  11  -4    1.88    1.99
  -2  11   4   -2.55    2.78
   2  11  -4   -1.57    7.22
   1 -11  -4    1.22    2.64
  -1 -11   4    1.79    2.74
  -1 -11   4    3.59    2.39
   1 -11  -4    1.31    5.52
   1  11  -4    7.01    6.72
  -1  11   4    2.59    2.89
   1  11  -4    4.22    2.19
  -1  11   4    4.67    4.68
  -1  11   4    1.86    1.45
   1  11  -4    4.64    4.04
   0 -11  -4   80.98    7.35
   0 -11  -4   54.49   10.28
   0 -11   4   81.84    5.51
   0 -11   4   92.76    6.11
   0  11   4   76.24   10.13
   0  11   4   87.62    6.08
   0  11  -4   95.41    5.61
   0  11  -4   71.49   11.38
   0  11  -4   75.69    8.16
   1 -11   4   18.47    3.45
   1 -11   4   27.13    4.39
   1 -11   4   28.37    5.76
   1 -11   4   22.03    3.46
  -1 -11  -4   24.34    5.00
  -1 -11  -4   16.17    5.02
   1 -11   4   24.71    3.62
   1  11   4   23.59    4.73
  -1  11  -4   24.14    7.42
   1  11   4   40.46    8.22
   1  11   4   21.33    3.42
   1  11   4   21.19    3.87
  -1  11  -4   28.99    4.12
   2 -11   4  118.14    6.96
  -2 -11  -4  103.03    8.36
   2 -11   4   96.34    7.16
   2 -11   4  111.17    9.02
  -2  11  -4  112.91    6.69
  -2  11  -4   68.81   13.44
   2  11   4   87.99    8.07
   2  11   4  105.47   11.72
   2  11   4   84.68    8.34
   3 -11   4   28.51    4.85
   3 -11   4   19.41    3.40
  -3 -11  -4   28.29    5.97
   3 -11   4   35.60    6.41
   3  11   4   28.19    8.58
  -3  11  -4   30.23    4.25
   3  11   4   22.10    5.49
  -3  11  -4   30.67    3.61
  -4 -11  -4   35.33    7.37
   4 -11   4   26.06    4.60
   4 -11   4   24.30    4.17
   4 -11   4   23.21    5.50
  -4  11  -4   23.76    3.79
  -4  11  -4   22.19    3.33
   4  11   4   34.86    9.56
   4  11   4   18.06    6.14
   5 -11   4    0.69    4.48
  -5 -11  -4   -0.67    5.36
   5 -11   4   -2.59    6.75
  -5  11  -4    2.23    3.51
   5  11   4   16.04   10.45
  -5  11  -4   -1.81    2.66
   6 -11   4    4.86    5.79
  -6  11  -4    1.43    4.23
   6  11   4   13.85   13.01
   5 -12  -4    8.48    5.33
  -5 -12   4   -1.38    4.76
  -5  12   4    1.39    4.31
  -5  12   4    2.09    3.86
   5  12  -4   31.67   10.83
   4 -12  -4    4.70    4.66
  -4 -12   4   13.21    4.17
  -4  12   4   15.28    3.60
   4  12  -4   35.11    8.66
  -4  12   4   11.68    3.46
   3 -12  -4   32.27    5.83
  -3 -12   4   37.55    5.42
  -3  12   4   32.04    4.07
   3  12  -4   32.50    8.64
  -3  12   4   30.75    4.72
  -2 -12   4  101.44    7.98
   2 -12  -4  106.09    8.93
   2  12  -4  131.12   13.57
  -2  12   4  113.76    6.76
  -2  12   4  112.16    5.97
   2  12  -4  110.98    6.59
   1 -12  -4   34.20    5.03
  -1 -12   4   34.20    4.49
  -1 -12   4   35.50    4.51
  -1  12   4   36.85    4.95
   1  12  -4   51.05    9.94
   1  12  -4   38.61    4.22
  -1  12   4   38.12    8.90
   0 -12   4   31.91    4.32
   0 -12  -4   14.91    7.71
   0 -12  -4   36.53    5.81
   0 -12   4   34.70    6.60
   0 -12   4   36.83    4.70
   0  12  -4   51.22   10.63
   0  12  -4   38.96    4.26
   0  12   4   46.92    9.06
   0  12   4   37.74    5.22
   1 -12   4    5.38    2.51
  -1 -12  -4    0.55    3.36
   1 -12   4   -0.67    2.52
   1 -12   4    4.26    4.24
   1 -12   4    4.35    3.64
  -1 -12  -4    4.05    5.44
  -1  12  -4    5.49    6.90
   1  12   4   -3.86    3.86
  -1  12  -4    4.94    2.93
   1  12   4    7.27    6.72
   1  12   4    4.77    3.87
   2 -12   4    0.45    2.47
   2 -12   4    4.49    3.17
   2 -12   4    0.97    4.62
  -2 -12  -4   -2.20    3.76
   2  12   4    7.22    7.13
   2  12   4    4.67    4.35
  -2  12  -4    2.98    2.77
  -2  12  -4   -6.83    8.70
   2  12   4  -11.49    4.43
   3 -12   4   19.55    3.44
   3 -12   4   21.89    4.18
   3 -12   4   15.46    5.07
  -3 -12  -4   23.43    4.75
  -3  12  -4   21.71    3.74
   3  12   4   11.28    5.53
   3  12   4   27.37    8.55
  -3  12  -4   17.30    3.23
  -4 -12  -4   53.54    7.86
   4 -12   4   39.42    7.02
   4 -12   4   32.38    6.81
  -4  12  -4   45.28    5.36
  -4  12  -4   42.79    5.55
   4  12   4   59.64   13.51
  -5 -12  -4   25.93    6.01
   5 -12   4   25.60    5.60
   5 -12   4   15.85    7.41
  -5  12  -4   19.01    3.74
  -5  12  -4   26.13    4.38
   5  12   4   43.98   12.58
  -5 -13   4   53.94    8.47
   5 -13  -4   49.96   10.87
  -5  13   4   50.59    7.07
   5  13  -4   70.38   13.17
  -5  13   4   59.41    5.92
  -4 -13   4    4.75    4.40
   4 -13  -4   -2.10    4.95
   4  13  -4   30.04   10.60
  -4  13   4   12.66    3.38
  -4  13   4    4.30    3.96
  -3 -13   4   19.45    4.13
   3 -13  -4   16.21    4.18
  -3  13   4   18.51    3.75
  -3  13   4   18.61    3.15
   3  13  -4   39.02    9.46
   2 -13  -4   -1.98    3.08
  -2 -13   4    3.62    3.49
   2  13  -4    0.23    3.05
  -2  13   4   -0.01    2.86
   2  13  -4   20.22    8.42
   1 -13  -4   20.34    4.22
  -1 -13   4   22.84    3.57
  -1  13   4   20.60    3.60
   1  13  -4   27.25    7.56
  -1  13   4   21.05    6.48
   1  13  -4   26.75    3.62
   0 -13  -4    2.63    3.73
   0 -13   4    5.44    2.93
   0 -13   4    3.66    4.56
   0  13   4    2.11    3.48
   0  13  -4    2.79    3.32
   0  13  -4    6.82    8.43
   0  13   4    4.40    6.94
   1 -13   4   85.48    9.01
   1 -13   4   81.58    6.35
  -1 -13  -4   84.78    8.05
   1  13   4   83.27    7.30
  -1  13  -4   74.39    6.92
  -1  13  -4   85.54   13.19
   1  13   4   91.30   12.06
  -2 -13  -4   10.79    3.88
   2 -13   4    4.31    4.96
   2 -13   4   10.48    3.57
  -2  13  -4   14.84    3.74
  -2  13  -4  -11.77   10.01
   2  13   4   10.50    8.02
   2  13   4   -1.46    4.93
   3 -13   4   47.65    6.29
  -3 -13  -4   54.03    7.91
   3 -13   4   44.60    9.51
  -3  13  -4   46.67    6.19
   3  13   4   50.16   12.30
   4 -13   4    1.16    4.90
  -4 -13  -4    1.98    5.46
   4 -13   4    8.03    6.83
   4  13   4    7.39   11.06
  -4  13  -4    0.95    4.11
  -4  13  -4   -0.22    4.34
  -5 -13  -4    9.50    6.52
   5 -13   4    0.61    5.71
  -5  13  -4   -2.45    4.60
   5  13   4    5.14   13.70
  -5  13  -4    6.64    3.87
   4 -14  -4   18.62    6.16
  -4 -14   4   25.92    5.51
   4  14  -4   38.15   10.55
  -4  14   4   31.04    5.23
  -3 -14   4    1.04    4.10
   3 -14  -4    1.80    3.96
  -3  14   4    7.20    3.44
   3  14  -4   10.62   10.03
  -2 -14   4   84.45    7.55
   2 -14  -4   86.23    8.47
   2  14  -4   99.42   13.42
  -2  14   4   95.50    7.08
   1 -14  -4   11.72    3.62
  -1 -14   4    8.92    3.46
  -1 -14   4   10.78    4.52
  -1  14   4    2.69    3.66
   1  14  -4    5.67    3.56
  -1  14   4   14.33    7.92
   1  14  -4   10.27    8.74
   0 -14  -4   54.80    6.65
   0 -14   4   51.13    5.62
   0 -14   4   62.66    8.58
   0  14   4   69.52   11.30
   0  14   4   60.32    6.14
   0  14  -4   66.36   11.37
   0  14  -4   54.84    6.37
   1 -14   4   -2.65    5.39
  -1 -14  -4   -0.46    3.51
   1  14   4    9.25    4.39
  -1  14  -4   10.45    8.93
   1  14   4   16.28    8.77
  -1  14  -4    5.11    3.87
  -2 -14  -4    0.01    4.67
   2 -14   4   -0.36    5.58
   2  14   4   -6.52    5.37
  -2  14  -4    4.99    4.08
   2  14   4    8.39    8.85
   3 -14   4   -5.41    6.99
  -3 -14  -4    5.37    4.69
   3  14   4  -11.14    5.98
   3  14   4   11.42   10.01
  -3  14  -4    1.35    4.29
   4 -14   4   40.72    9.05
  -4 -14  -4   60.42    9.96
  -4  14  -4   44.68    7.65
  -4  14  -4   53.60    6.42
   4  14   4   60.60   13.54
  -3 -15   4   12.38    4.84
   3 -15  -4    6.96    5.04
  -3  15   4   18.19    4.02
   3  15  -4   27.76   11.28
  -2 -15   4    0.04    4.41
   2 -15  -4    3.10    4.45
   2  15  -4   25.23   10.37
  -2  15   4   -2.38    3.92
  -1 -15   4    9.30    5.98
   1 -15  -4    9.17    4.60
  -1  15   4   12.64    8.83
   1  15  -4   11.11    9.71
  -1  15   4    2.42    4.90
   0 -15   4   14.19    6.32
   0 -15  -4   16.29    4.72
   0  15   4   10.17    8.51
   0  15   4   21.76    5.49
   0  15  -4   16.69    4.37
   0  15  -4   38.49    9.16
   1 -15   4   32.96    7.01
  -1 -15  -4   43.65    7.84
   1  15   4   42.20    6.88
   1  15   4   52.15   12.64
  -1  15  -4   46.03    6.90
  -1  15  -4   40.72   10.83
  -2 -15  -4   37.66    8.11
   2 -15   4   36.16    7.35
   2  15   4   34.87   11.20
   2  15   4   30.45    6.79
  -2  15  -4   35.50    5.23
  -3 -15  -4   22.62    5.76
   3 -15   4   29.76    7.95
  -3  15  -4   23.24    4.72
   3  15   4   22.73    7.21
   3  15   4   29.61   12.07
  -2 -16   4    7.90    5.66
   2 -16  -4    4.32    5.18
  -2  16   4   10.60    4.95
   2  16  -4   11.25   10.38
   1 -16  -4   44.31    8.09
  -1 -16   4   53.27    9.76
   1  16  -4   63.87   12.99
  -1  16   4   44.27    6.46
   0 -16  -4    2.21    5.06
   0 -16   4    5.79    6.06
   0  16  -4   23.72    9.92
   0  16   4    0.30    8.29
   0  16   4   -3.18    5.88
  -1 -16  -4    4.53    5.05
   1 -16   4    4.27    7.04
  -1  16  -4    8.34    5.27
   1  16   4   21.24   11.37
  -1  16  -4    6.30    9.78
   1  16   4    3.61    6.42
   2 -16   4   -0.89    7.73
  -2 -16  -4    6.74    5.38
   2  16   4  -20.87   12.29
   2  16   4    0.67    7.27
  -2  16  -4    2.02    5.52
  -8   0   5    0.51    4.82
  -8   0   5    2.91    3.71
   8   0  -5    7.54    6.69
  -7   0   5   20.40    3.35
   7   0  -5   12.57    5.73
  -7   0   5   27.50    4.46
  -6   0   5    5.17    3.70
  -6   0   5    4.13    2.51
   5   0  -5   51.96    4.57
   5   0  -5   44.16    6.81
  -5   0   5   54.49    4.24
  -5   0   5   53.96    4.94
   4   0  -5    1.56    1.86
   4   0  -5    0.49    1.68
   4   0  -5    5.14    2.71
   4   0  -5   -0.04    1.44
  -4   0   5   -0.10    1.57
  -4   0   5    3.58    1.97
  -4   0   5   -2.43    2.01
  -3   0   5  442.56   22.06
   3   0  -5  467.21   22.05
   3   0  -5  478.64   27.03
   3   0  -5  498.38   27.75
   3   0  -5  480.02   28.66
  -3   0   5  491.48   27.13
  -3   0   5  476.37   28.54
  -2   0   5    0.65    1.00
   2   0  -5    0.61    1.81
  -2   0   5    0.14    1.42
  -2   0   5   -0.10    2.07
   2   0  -5    1.25    1.08
  -2   0   5    3.70    2.03
   1   0  -5  211.39   13.04
  -1   0   5  211.99   13.11
   1   0  -5  232.28   13.49
   1   0  -5  224.17   13.94
  -1   0   5  249.12   13.66
  -1   0   5  233.20   13.84
   0   0   5   -4.75    2.51
   0   0  -5    0.67    2.10
   0   0  -5    1.20    1.39
   0   0   5   -1.95    1.82
   0   0   5    0.35    1.23
   1   0   5   22.00    1.93
  -1   0  -5   23.06    2.89
   1   0   5   22.24    2.04
   1   0   5   22.08    3.50
  -2   0  -5   -1.14    1.38
  -2   0  -5    0.46    1.59
   2   0   5    0.04    2.13
   2   0   5   -0.89    1.04
  -3   0  -5  123.67    6.02
   3   0   5  125.23    5.96
   3   0   5  120.21    8.07
  -4   0  -5    1.53    1.54
   4   0   5   -1.13    2.31
   5   0   5  186.69   11.68
  -5   0  -5  178.20    8.84
  -5   0  -5  166.59   10.85
  -6   0  -5    1.04    2.42
   6   0   5    2.76    2.91
  -7   0  -5   33.12    4.78
   7   0   5   36.02    5.63
  -8   0  -5   -5.71    3.84
   8   0   5   -6.88    5.33
  -8  -1   5   22.91    4.28
   8  -1  -5   12.53    7.21
  -8  -1   5   24.03    5.91
  -8   1   5   20.11    5.35
  -8   1   5   26.29    3.99
  -7  -1   5   12.71    3.29
  -7  -1   5   16.66    4.55
   7  -1  -5   -0.55    5.33
  -7   1   5   10.72    2.60
  -7   1   5   15.37    4.11
   7   1  -5    5.81    5.28
  -6  -1   5  112.78    6.55
  -6  -1   5  122.28    8.40
   6  -1  -5   89.16   10.15
  -6   1   5  131.30    8.74
  -6   1   5  121.26    6.41
   6   1  -5   94.26   10.01
   6   1  -5  117.23    7.42
   5  -1  -5   33.80    4.39
  -5  -1   5   34.85    4.64
   5  -1  -5   24.64    4.63
   5   1  -5   32.58    4.03
   5   1  -5   28.95    6.23
  -5   1   5   29.16    3.90
  -5   1   5   28.15    4.04
   4  -1  -5   87.70    7.71
  -4  -1   5   91.74    6.18
   4  -1  -5   93.58    6.16
  -4  -1   5   81.85    6.73
   4  -1  -5   90.62    6.12
   4  -1  -5   89.67    5.09
  -4  -1   5   90.58    4.98
  -4   1   5   75.10    6.47
  -4   1   5   98.41    6.18
   4   1  -5   94.77    6.45
   4   1  -5   93.14    4.96
   4   1  -5   94.31    5.84
  -4   1   5   88.43    5.04
   4   1  -5   93.51    7.58
  -3  -1   5    4.46    1.08
  -3  -1   5    3.86    1.78
   3  -1  -5    5.22    1.38
   3  -1  -5    5.67    1.55
  -3  -1   5    4.42    1.91
   3  -1  -5    8.96    2.78
   3  -1  -5    4.51    1.37
  -3   1   5    5.32    1.60
   3   1  -5    6.76    1.22
  -3   1   5    4.85    1.26
   3   1  -5    4.97    1.64
   3   1  -5    4.04    1.09
  -3   1   5    4.35    1.63
   3   1  -5    6.90    2.79
   2  -1  -5   17.52    2.94
  -2  -1   5   22.24    3.34
  -2  -1   5   28.03    3.56
  -2  -1   5   18.78    2.57
   2  -1  -5   21.64    2.26
  -2   1   5   15.31    2.03
  -2   1   5   15.94    3.33
   2   1  -5   19.81    2.05
  -2   1   5   16.88    2.93
  -2   1   5   19.83    2.55
  -1  -1   5   34.77    3.66
   1  -1  -5   37.03    3.66
   1  -1  -5   33.92    2.88
  -1  -1   5   38.38    3.17
  -1  -1   5   43.21    3.80
   1  -1  -5   38.92    3.55
   1   1  -5   43.43    4.31
   1   1  -5   38.62    3.47
   1   1  -5   33.89    2.74
  -1   1   5   34.50    3.15
  -1   1   5   33.07    3.41
  -1   1   5   38.21    3.95
   0  -1  -5  204.79   12.42
   0  -1  -5  202.85   12.24
   0  -1   5  194.66   12.36
   0  -1   5  203.44   12.23
   0  -1   5  210.26   12.03
   0   1   5  170.07   11.85
   0   1  -5  212.28   11.92
   0   1   5  209.11   12.41
   0   1  -5  187.82   14.84
   0   1  -5  217.44   12.33
   0   1   5  197.08   12.18
   0   1  -5  215.58   12.21
   1  -1   5  272.25   15.88
   1  -1   5  287.44   15.96
   1  -1   5  241.17   19.37
  -1  -1  -5  275.65   15.91
  -1  -1  -5  263.03   15.92
   1  -1   5  262.27   12.32
   1   1   5  269.79   12.28
  -1   1  -5  281.06   15.84
   1   1   5  260.46   15.89
   1   1   5  273.29   16.11
   2  -1   5  507.01   28.74
  -2  -1  -5  488.64   28.64
  -2  -1  -5  487.79   22.28
   2  -1   5  458.32   22.25
   2   1   5  491.45   22.24
   2   1   5  512.32   28.80
  -2   1  -5  494.99   22.31
  -2   1  -5  505.87   28.65
  -3  -1  -5   47.41    3.00
   3  -1   5   49.49    4.28
  -3  -1  -5   48.17    3.43
   3  -1   5   44.76    2.64
   3  -1   5   52.99    3.27
   3   1   5   46.84    2.81
   3   1   5   49.58    4.12
  -3   1  -5   46.66    3.09
  -4  -1  -5   24.44    2.67
   4  -1   5   32.37    3.88
  -4  -1  -5   28.68    3.43
   4   1   5   24.68    2.52
   4   1   5   33.13    4.11
  -4   1  -5   28.33    2.75
   5  -1   5   24.24    3.88
  -5  -1  -5   29.29    3.17
  -5  -1  -5   21.18    4.30
  -5   1  -5   27.19    3.15
   5   1   5   27.72    4.75
   6  -1   5   17.86    3.60
  -6  -1  -5   19.53    2.92
  -6   1  -5   25.76    3.16
   6   1   5   15.43    3.93
   7  -1   5   13.45    4.04
  -7  -1  -5   18.32    3.40
  -7   1  -5   15.96    3.29
   7   1   5   13.07    4.07
   8  -1   5   35.70    5.87
  -8  -1  -5   39.17    6.10
  -8   1  -5   44.04    5.30
   8   1   5   35.02    6.93
  -8  -2   5    9.17    5.59
   8  -2  -5    6.02    7.86
  -8  -2   5   17.14    3.81
  -8   2   5   11.21    3.67
  -7  -2   5   11.42    4.45
   7  -2  -5   -3.21    5.37
  -7  -2   5   12.31    3.38
  -7   2   5    8.30    4.12
  -7   2   5    8.54    2.86
  -6  -2   5    3.81    3.00
  -6  -2   5    4.62    2.49
   6   2  -5    7.06    4.14
  -6   2   5   -0.86    3.07
  -6   2   5    1.70    3.65
  -6   2   5   -3.12    2.54
  -5  -2   5    9.05    3.00
   5  -2  -5    8.71    4.11
   5  -2  -5    4.47    2.79
  -5   2   5    8.29    2.34
   5   2  -5    7.98    2.31
   5   2  -5    3.56    3.65
  -5   2   5    7.75    3.06
   4  -2  -5   98.10    5.62
   4  -2  -5   93.26    6.35
  -4  -2   5   97.00    6.49
   4  -2  -5   98.07    7.92
   4   2  -5   91.84    6.97
   4   2  -5   92.36    7.81
  -4   2   5  103.59    6.59
   4   2  -5   89.73    4.95
  -4   2   5   96.08    5.41
   3  -2  -5  134.65    8.00
   3  -2  -5  141.00    6.63
   3  -2  -5  129.62    8.24
  -3  -2   5  126.03    8.92
  -3  -2   5  129.12    8.22
   3  -2  -5  135.84    9.42
   3   2  -5  137.80    8.45
   3   2  -5  139.13    8.02
  -3   2   5  130.56    6.74
  -3   2   5  127.13    8.53
   3   2  -5  130.20    9.37
  -3   2   5  138.31    8.17
  -2  -2   5  305.40   19.26
   2  -2  -5  365.07   19.86
  -2  -2   5  351.24   20.55
  -2  -2   5  314.92   19.66
   2  -2  -5  333.79   19.14
  -2  -2   5  295.42   15.48
   2  -2  -5  368.54   20.60
  -2   2   5  350.20   20.30
   2   2  -5  350.44   20.66
   2   2  -5  333.74   19.23
  -2   2   5  319.39   19.17
   2   2  -5  348.71   19.69
  -2   2   5  334.50   15.78
  -2   2   5  350.06   19.90
  -1  -2   5  100.00    6.18
   1  -2  -5   94.72    6.08
   1  -2  -5   93.78    6.49
   1  -2  -5   79.39    5.69
  -1  -2   5   99.92    6.74
  -1  -2   5   86.91    5.87
   1   2  -5   89.97    6.25
   1   2  -5   98.25    6.94
  -1   2   5   91.21    6.09
  -1   2   5   95.06    6.50
   1   2  -5   81.14    5.66
  -1   2   5   91.68    5.69
   0  -2   5    4.62    1.73
   0  -2   5    6.07    2.47
   0  -2  -5    1.49    1.90
   0  -2  -5    4.92    2.47
   0  -2   5    2.24    2.07
   0  -2  -5    3.72    1.34
   0   2  -5    5.83    1.87
   0   2   5    6.97    3.01
   0   2   5    3.29    1.64
   0   2   5    4.33    1.32
   0   2  -5    2.59    1.68
   1  -2   5   14.51    1.97
   1  -2   5   19.13    3.02
  -1  -2  -5   16.33    2.14
   1  -2   5   14.88    2.39
  -1  -2  -5   20.56    3.25
   1   2   5   16.09    1.92
   1   2   5   23.00    4.30
   1   2   5   14.26    2.04
  -1   2  -5   18.38    2.47
  -2  -2  -5    5.73    1.20
   2  -2   5    5.10    1.32
   2  -2   5    9.48    2.08
  -2  -2  -5    8.83    1.34
   2  -2   5    5.29    1.19
   2   2   5    9.78    2.51
  -2   2  -5    7.43    1.40
  -2   2  -5    5.16    1.46
   3  -2   5   72.70    3.73
  -3  -2  -5   71.96    5.18
   3  -2   5   71.87    3.95
   3  -2   5   75.20    5.36
  -3  -2  -5   67.75    4.81
  -3  -2  -5   70.48    3.88
  -3   2  -5   75.09    4.07
   3   2   5   76.81    3.90
   3   2   5   68.71    5.50
   3   2   5   69.88    4.65
   4  -2   5   92.00    6.65
  -4  -2  -5   86.91    4.95
  -4  -2  -5   91.82    7.07
   4   2   5   91.99    6.93
  -4   2  -5   93.59    5.09
   4   2   5   96.70    5.23
   5  -2   5   85.27    6.86
  -5  -2  -5   82.33    7.65
  -5  -2  -5   88.95    5.16
  -5   2  -5   88.72    5.01
   5   2   5   85.91    7.31
  -6  -2  -5   77.94    5.60
   6  -2   5   86.19    7.18
   6   2   5   92.98    7.98
  -6   2  -5   89.53    5.51
  -7  -2  -5    6.61    3.21
   7  -2   5    6.26    3.14
  -7   2  -5   10.99    3.03
   7   2   5    8.53    4.94
  -8  -2  -5    1.04    4.08
  -8   2  -5    8.58    3.95
   8   2   5    3.84    6.41
   8  -3  -5   -4.07    7.08
  -8  -3   5   -2.52    4.55
  -8  -3   5    3.05    4.22
  -8   3   5    5.50    3.22
  -7  -3   5   92.64    7.35
   7  -3  -5   55.41   10.50
  -7  -3   5   90.04    6.35
  -7   3   5   99.05    8.52
  -7   3   5   76.96    5.48
   6  -3  -5    2.31    4.98
  -6  -3   5   10.09    3.26
  -6   3   5   13.78    3.75
  -6   3   5    9.45    2.89
  -6   3   5   10.34    3.14
   5  -3  -5   52.82    7.44
  -5  -3   5   64.20    5.35
  -5   3   5   63.21    5.60
  -5   3   5   61.34    4.88
   5   3  -5   58.51    4.28
  -5   3   5   58.83    4.17
  -4  -3   5    7.04    2.43
   4  -3  -5    7.30    2.02
   4  -3  -5    6.76    2.21
   4  -3  -5    4.87    3.19
  -4   3   5    5.77    1.77
   4   3  -5    3.61    3.06
   4   3  -5    4.47    1.39
  -4   3   5    4.98    2.24
   4   3  -5    2.50    2.56
   3  -3  -5   13.45    1.76
   3  -3  -5   13.21    2.56
  -3  -3   5   14.50    2.68
   3  -3  -5   14.03    2.39
  -3  -3   5   10.38    2.63
   3  -3  -5   13.57    2.50
   3   3  -5   10.97    2.85
  -3   3   5   14.17    2.29
   3   3  -5   10.72    1.81
  -3   3   5   13.76    2.39
   3   3  -5   18.20    3.19
  -3   3   5   16.72    2.67
   2  -3  -5   -2.03    1.72
  -2  -3   5    3.18    2.60
   2  -3  -5   -0.13    1.97
   2  -3  -5    1.22    1.25
  -2  -3   5    0.16    1.54
  -2   3   5   -0.32    1.52
  -2   3   5   -1.79    2.16
  -2   3   5   -0.27    1.19
  -2   3   5   -0.20    1.19
   2   3  -5    0.88    1.89
   2   3  -5   -0.16    1.12
   1  -3  -5   89.66    6.08
   1  -3  -5   84.47    5.64
  -1  -3   5   86.95    5.87
   1  -3  -5   74.84    7.49
  -1  -3   5   97.82    6.79
   1  -3  -5   87.97    6.37
  -1  -3   5   96.53    5.95
  -1   3   5   78.12    5.78
  -1   3   5   84.00    6.35
   1   3  -5   88.86    5.62
  -1   3   5   94.10    5.51
   1   3  -5   89.63    6.12
   0  -3   5    8.43    2.02
   0  -3   5    6.44    2.39
   0  -3  -5    5.32    1.63
   0  -3   5    6.14    1.96
   0  -3  -5    8.40    2.83
   0  -3   5    8.87    1.46
   0   3   5    7.32    2.90
   0   3   5    7.81    1.57
   0   3   5    3.43    1.75
   0   3  -5    6.10    1.69
   0   3  -5    7.59    1.82
   0   3   5   10.53    1.77
   1  -3   5  431.93   23.46
   1  -3   5  407.88   18.25
   1  -3   5  401.86   29.15
   1  -3   5  374.38   23.03
   1  -3   5  422.24   18.72
  -1  -3  -5  389.10   23.79
  -1  -3  -5  402.30   23.62
   1   3   5  396.16   18.11
   1   3   5  374.90   29.09
  -1   3  -5  405.69   29.36
   1   3   5  392.26   23.81
   1   3   5  380.19   23.77
  -1   3  -5  438.60   23.38
  -2  -3  -5    0.28    1.34
  -2  -3  -5    2.40    1.41
   2  -3   5    0.78    1.04
   2  -3   5    1.38    2.01
   2  -3   5    0.49    1.79
  -2  -3  -5    2.10    1.19
   2  -3   5   -1.23    0.99
   2  -3   5   -0.94    1.02
   2   3   5    1.27    1.12
   2   3   5    6.16    2.49
  -2   3  -5    0.22    1.49
   3  -3   5  143.95    7.21
   3  -3   5  154.14    9.29
  -3  -3  -5  151.84    9.04
  -3  -3  -5  140.43    7.04
   3  -3   5  158.02   11.56
   3  -3   5  137.46    7.00
   3   3   5  132.02    8.77
  -3   3  -5  144.35    7.20
   3   3   5  147.88    7.08
   3   3   5  159.63    9.51
   4  -3   5    0.61    2.26
  -4  -3  -5    3.38    1.70
   4  -3   5    4.66    1.75
  -4  -3  -5    2.44    2.99
   4   3   5    2.74    2.11
  -4   3  -5    3.70    1.54
   4   3   5    2.95    2.71
  -5  -3  -5    0.91    2.22
   5  -3   5    5.85    2.40
  -5  -3  -5    3.22    4.23
  -5   3  -5    4.40    1.78
   5   3   5    4.33    3.19
  -6  -3  -5   -1.43    2.40
   6  -3   5    4.68    2.99
  -6   3  -5    3.27    2.27
   6   3   5   -2.30    4.01
   7  -3   5   63.63    6.30
  -7  -3  -5   63.46    5.69
   7   3   5   72.45    8.63
  -7   3  -5   72.16    5.41
  -8  -3  -5    6.25    4.23
   8   3   5   -0.42    6.98
  -8  -4   5   26.18    4.76
   8  -4  -5    8.64    7.76
  -7  -4   5    6.16    3.51
  -7  -4   5    1.36    3.36
   7  -4  -5   -6.34    5.80
  -7   4   5    4.49    3.23
  -7   4   5    1.62    3.83
   6  -4  -5   -5.06    4.68
  -6  -4   5    6.70    3.04
  -6   4   5   -0.71    2.65
  -6   4   5    9.85    2.41
  -6   4   5    1.95    3.98
   5  -4  -5    0.63    3.14
  -5  -4   5    6.85    2.64
   5  -4  -5   -6.29    3.76
   5   4  -5   -3.66    4.56
  -5   4   5    3.58    2.84
  -5   4   5    2.81    2.63
  -5   4   5    1.65    2.54
   5   4  -5    3.30    2.06
   4  -4  -5   77.90    7.09
  -4  -4   5   86.54    5.95
   4  -4  -5   69.09    4.83
   4  -4  -5   73.97    5.41
   4   4  -5   62.61    6.36
  -4   4   5   87.33    5.68
  -4   4   5   82.12    5.00
   4   4  -5   66.67    3.88
  -3  -4   5   35.12    4.19
  -3  -4   5   36.29    3.47
   3  -4  -5   34.19    2.54
   3  -4  -5   28.99    3.04
   3  -4  -5   29.49    2.81
   3  -4  -5   38.50    4.59
   3   4  -5   26.01    2.74
  -3   4   5   35.22    3.15
  -3   4   5   33.45    2.86
  -3   4   5   38.51    3.16
   3   4  -5   32.80    3.98
   2  -4  -5  477.04   27.93
  -2  -4   5  469.63   27.92
   2  -4  -5  486.00   27.11
   2  -4  -5  457.62   26.24
   2  -4  -5  466.74   33.99
  -2  -4   5  466.50   26.50
  -2   4   5  468.65   27.74
   2   4  -5  458.78   26.94
  -2   4   5  475.82   27.18
  -2   4   5  475.17   21.73
   2   4  -5  435.14   26.37
  -2   4   5  442.99   26.20
   1  -4  -5   60.42    4.77
   1  -4  -5   64.46    4.77
  -1  -4   5   57.50    4.42
  -1  -4   5   74.77    5.60
  -1  -4   5   65.06    4.41
   1  -4  -5   63.05    6.45
  -1  -4   5   51.92    3.02
   1   4  -5   65.27    7.84
  -1   4   5   59.22    4.06
   1   4  -5   73.42    4.74
  -1   4   5   66.14    5.07
  -1   4   5   59.60    3.88
   1   4  -5   54.51    4.21
  -1   4   5   63.66    4.45
   0  -4  -5   48.47    4.27
   0  -4   5   55.45    2.94
   0  -4  -5   60.19    5.14
   0  -4  -5   37.40    6.30
   0  -4   5   63.71    4.67
   0  -4   5   49.14    3.33
   0  -4   5   44.14    4.03
   0   4  -5   41.05    4.10
   0   4   5   53.59    4.82
   0   4  -5   43.00    6.41
   0   4  -5   61.00    3.88
   0   4   5   49.99    3.82
   0   4   5   45.81    4.92
   1  -4   5    1.36    1.18
   1  -4   5    1.50    1.70
  -1  -4  -5    1.14    1.48
   1  -4   5   -2.01    2.66
  -1  -4  -5    2.93    2.32
   1  -4   5   -0.19    1.12
   1  -4   5   -0.84    1.69
   1   4   5    0.90    3.04
  -1   4  -5    1.48    1.57
   1   4   5    0.72    1.08
  -1   4  -5    1.04    3.48
   1   4   5   -0.77    2.26
   2  -4   5   64.07    4.93
  -2  -4  -5   58.98    4.80
   2  -4   5   65.50    3.68
   2  -4   5   76.09    4.74
   2  -4   5   68.78    3.58
   2  -4   5   66.60    6.22
  -2  -4  -5   62.31    4.81
  -2   4  -5   78.39    3.98
   2   4   5   66.38    4.51
   2   4   5   73.37    3.57
   2   4   5   68.16    7.15
   2   4   5   72.77    5.74
   3  -4   5   15.57    4.00
   3  -4   5    8.54    1.14
   3  -4   5   10.66    1.77
  -3  -4  -5   11.30    1.57
  -3  -4  -5    8.69    1.75
   3  -4   5   11.59    2.13
   3  -4   5   10.48    1.73
  -3  -4  -5   12.10    2.43
   3   4   5   10.70    1.65
   3   4   5   14.30    1.60
   3   4   5    9.69    2.70
  -3   4  -5   10.38    1.73
   4  -4   5  194.20   11.41
   4  -4   5  178.00   11.46
  -4  -4  -5  169.14    8.68
   4  -4   5  177.36   15.43
  -4  -4  -5  160.13   12.12
   4   4   5  183.74   11.75
  -4   4  -5  196.21    8.93
   4   4   5  185.43    8.91
   5  -4   5   14.53    2.65
  -5  -4  -5    8.62    2.36
  -5  -4  -5    4.94    4.83
   5  -4   5   11.49    2.88
  -5   4  -5   13.79    2.10
   5   4   5   14.22    3.75
   6  -4   5   98.57    7.96
  -6  -4  -5   97.59    6.14
  -6   4  -5  112.57    6.20
   6   4   5   97.15    9.01
  -7  -4  -5    6.21    3.61
   7  -4   5   10.60    3.35
  -7   4  -5    3.95    2.91
   7   4   5    7.04    5.47
  -7  -5   5   36.58    5.46
  -7  -5   5   37.11    5.19
   7  -5  -5   16.80    6.88
  -7   5   5   32.38    4.73
  -7   5   5   36.82    4.68
   6  -5  -5   49.72    8.88
  -6  -5   5   61.34    6.24
  -6   5   5   69.66    6.99
  -6   5   5   66.88    5.98
  -6   5   5   59.91    5.00
   5  -5  -5   47.60    7.40
   5  -5  -5   57.11    5.95
  -5  -5   5   53.34    5.15
  -5   5   5   57.38    4.49
   5   5  -5   41.51    7.27
  -5   5   5   64.27    5.52
   5   5  -5   50.66    3.70
  -5   5   5   58.64    5.12
   4  -5  -5   16.40    3.37
   4  -5  -5   18.24    3.71
  -4  -5   5   17.51    3.48
  -4   5   5   17.45    2.59
   4   5  -5   12.82    3.55
  -4   5   5   19.02    2.61
  -4   5   5   15.51    2.45
  -3  -5   5   10.10    2.64
   3  -5  -5    9.76    2.70
   3  -5  -5    7.68    1.76
  -3  -5   5   10.12    2.38
   3  -5  -5   13.20    2.25
  -3   5   5   10.88    2.37
   3   5  -5    7.34    1.47
  -3   5   5    6.76    1.78
   3   5  -5    8.71    2.58
  -3   5   5   10.95    2.27
   2  -5  -5   11.03    2.36
  -2  -5   5   13.97    2.50
   2  -5  -5   19.08    4.22
   2  -5  -5   12.23    2.14
  -2  -5   5   11.90    2.40
   2   5  -5   12.91    2.03
  -2   5   5   14.97    3.11
  -2   5   5   11.66    2.03
   2   5  -5   18.72    3.23
  -2   5   5   12.25    1.78
  -2   5   5   11.01    1.94
  -1  -5   5   56.62    5.05
   1  -5  -5   61.42    4.56
  -1  -5   5   60.06    4.17
   1  -5  -5   59.11    4.72
  -1  -5   5   60.89    4.32
  -1  -5   5   55.71    3.05
   1  -5  -5   59.46    6.56
  -1   5   5   62.70    3.87
  -1   5   5   61.27    3.85
  -1   5   5   53.84    4.77
  -1   5   5   62.16    4.24
   1   5  -5   63.93    4.28
   1   5  -5   57.79    7.73
   1   5  -5   64.44    4.19
   0  -5   5  141.57    6.93
   0  -5   5  118.30    6.83
   0  -5  -5  143.77    9.31
   0  -5   5  139.63   11.84
   0  -5   5  148.38    8.80
   0  -5   5  151.40    8.93
   0  -5  -5  147.90    9.23
   0  -5  -5  142.16   12.01
   0   5  -5  134.33    8.73
   0   5  -5  158.47    8.65
   0   5   5  145.97   11.29
   0   5  -5  134.07   12.29
   0   5   5  152.20    9.30
   0   5   5  134.66    8.89
   1  -5   5  191.80   10.59
   1  -5   5  178.10   10.55
   1  -5   5  176.76    8.39
   1  -5   5  172.53   13.39
   1  -5   5  177.16    8.19
  -1  -5  -5  179.13   10.97
   1   5   5  160.08   13.41
  -1   5  -5  155.01   14.31
   1   5   5  171.61    7.99
   1   5   5  176.37   11.17
   2  -5   5  157.79    7.40
  -2  -5  -5  143.04    9.49
   2  -5   5  161.10   11.88
   2  -5   5  145.28    7.14
   2  -5   5  133.32    9.23
  -2  -5  -5  154.71    9.36
   2  -5   5  153.99    9.37
   2  -5   5  146.31    9.38
  -2   5  -5  159.97    7.39
   2   5   5  144.58    9.05
   2   5   5  155.50   10.14
   2   5   5  137.33    7.00
   2   5   5  164.56   12.33
  -3  -5  -5   50.24    4.72
  -3  -5  -5   49.26    3.10
   3  -5   5   52.88    4.38
   3  -5   5   55.10    4.41
   3  -5   5   51.73    3.12
   3  -5   5   54.78    6.30
  -3  -5  -5   50.28    4.41
   3   5   5   57.31    5.25
  -3   5  -5   49.86    3.48
   3   5   5   48.52    3.20
   3   5   5   40.78    3.94
   4  -5   5   19.32    3.96
   4  -5   5   16.85    2.94
  -4  -5  -5   12.79    2.05
   4   5   5   21.40    3.69
  -4   5  -5   18.58    2.79
  -5  -5  -5   -1.91    4.95
   5  -5   5    3.92    2.97
  -5  -5  -5    2.45    2.12
   5  -5   5    0.90    2.97
  -5   5  -5    6.75    2.13
   5   5   5    7.79    3.79
  -6  -5  -5    5.45    2.83
   6  -5   5    0.81    2.80
  -6   5  -5    6.80    2.49
   6   5   5    6.93    4.61
   7  -5   5   35.65    5.85
  -7  -5  -5   26.91    4.19
   7   5   5   22.01    6.42
  -7   5  -5   40.86    4.39
   7  -6  -5   -0.17    6.51
  -7  -6   5   17.26    3.97
  -7  -6   5   10.39    4.24
  -7   6   5   11.25    4.58
  -7   6   5    8.58    3.36
   6  -6  -5   -3.45    5.17
  -6  -6   5   -2.65    2.95
  -6   6   5    0.90    3.51
  -6   6   5   -3.27    3.17
  -5  -6   5   21.93    4.15
   5  -6  -5   20.15    3.57
   5  -6  -5   18.09    4.54
  -5   6   5   18.98    3.08
   5   6  -5   17.29    4.71
  -5   6   5   20.63    4.25
  -5   6   5   24.27    3.10
  -4  -6   5   11.39    2.96
   4  -6  -5   10.35    2.43
   4  -6  -5    6.57    3.46
  -4   6   5   13.10    2.59
  -4   6   5   12.33    2.37
   4   6  -5    9.94    3.60
  -4   6   5   10.24    2.77
   3  -6  -5  237.87   14.44
  -3  -6   5  261.02   15.03
   3  -6  -5  251.12   16.03
  -3   6   5  265.43   11.97
  -3   6   5  256.28   12.38
  -3   6   5  258.04   14.51
   3   6  -5  236.06   15.07
  -2  -6   5   36.27    3.35
   2  -6  -5   25.47    4.92
  -2  -6   5   24.08    3.71
   2  -6  -5   34.92    3.17
   2  -6  -5   30.69    4.05
  -2   6   5   35.85    3.32
  -2   6   5   38.48    2.62
  -2   6   5   31.83    2.95
   2   6  -5   34.90    8.32
   2   6  -5   25.93    3.70
   2   6  -5   40.23    3.10
   1  -6  -5  173.96   13.53
   1  -6  -5  179.12   10.99
  -1  -6   5  172.71   10.02
  -1  -6   5  158.40   10.14
   1  -6  -5  177.90   10.48
  -1   6   5  168.72   10.55
  -1   6   5  177.41   10.61
   1   6  -5  182.50   10.05
   1   6  -5  158.70   10.12
  -1   6   5  163.23    8.50
  -1   6   5  156.18    9.72
   1   6  -5  180.32   14.27
   0  -6   5    7.03    1.38
   0  -6  -5    5.72    2.42
   0  -6  -5    9.47    4.00
   0  -6   5    4.50    2.06
   0  -6   5    8.15    1.69
   0  -6  -5    9.17    2.07
   0  -6   5    9.44    1.34
   0  -6   5    1.18    2.98
   0   6  -5    6.29    1.28
   0   6   5    6.79    2.44
   0   6   5    6.01    1.22
   0   6  -5    5.86    4.31
   0   6   5    6.95    2.80
   0   6  -5    2.74    1.98
   1  -6   5    9.39    2.60
   1  -6   5    3.65    1.93
   1  -6   5    1.50    1.16
  -1  -6  -5   -0.50    2.39
  -1  -6  -5    3.69    1.83
   1  -6   5    4.26    1.81
   1   6   5    3.76    0.85
  -1   6  -5    1.71    4.10
   1   6   5    1.95    1.62
  -1   6  -5    0.98    1.42
   1   6   5    4.02    3.05
   1   6   5    3.30    2.80
   2  -6   5    2.27    1.71
  -2  -6  -5   -2.97    2.44
   2  -6   5    1.13    1.11
  -2  -6  -5    2.29    1.91
   2  -6   5    2.02    1.07
   2  -6   5    1.17    1.90
   2  -6   5    8.75    2.76
   2  -6   5    0.35    2.05
   2   6   5    0.47    1.92
  -2   6  -5    3.93    1.74
   2   6   5    1.62    1.00
   2   6   5    6.35    4.02
   2   6   5   -0.57    2.95
  -2   6  -5    2.64    1.57
   3  -6   5   95.32    9.73
  -3  -6  -5   94.79    6.97
   3  -6   5   96.81    6.84
  -3  -6  -5   87.24    7.16
  -3  -6  -5   99.34    5.02
   3  -6   5  107.99    7.05
  -3   6  -5  111.15    5.46
   3   6   5   98.65    7.00
   3   6   5   96.54    7.66
   3   6   5   94.09   10.12
   4  -6   5   21.48    4.02
  -4  -6  -5   14.83    2.15
   4  -6   5   13.29    3.09
   4   6   5   12.78    3.81
  -4   6  -5   22.56    3.03
   5  -6   5  116.46    8.80
   5  -6   5  117.95    9.03
  -5  -6  -5  119.87    6.57
  -5   6  -5  127.62    6.74
   5   6   5  115.21    9.83
   6  -6   5   25.74    5.27
  -6  -6  -5   11.82    2.96
   6   6   5    8.81    5.12
  -6   6  -5   15.67    2.50
  -7  -6  -5   21.24    4.05
   7  -6   5   33.50    6.36
  -7   6  -5   30.73    4.04
   7   6   5   28.74    6.91
  -7  -7   5   -0.58    3.76
   7  -7  -5   -6.83    7.00
  -7  -7   5    1.77    3.94
  -7   7   5   -3.03    4.08
  -7   7   5   -2.14    4.70
   6  -7  -5  116.76   11.83
  -6  -7   5  116.85    8.83
  -6   7   5  126.18    7.54
  -6   7   5  127.16    7.94
   5  -7  -5   -1.13    4.29
  -5  -7   5    3.83    3.26
  -5   7   5    4.98    3.09
  -5   7   5    6.61    3.04
  -4  -7   5  108.33    7.56
   4  -7  -5  104.47    6.69
   4  -7  -5  104.43    8.61
  -4   7   5  103.38    6.40
  -4   7   5  110.12    6.21
   4   7  -5   81.43    7.85
  -3  -7   5    2.01    2.26
   3  -7  -5    1.07    2.74
   3  -7  -5   -3.78    1.61
   3   7  -5    1.73    2.82
  -3   7   5    0.68    2.24
  -3   7   5   -0.78    2.30
   3   7  -5   -7.38    8.13
   2  -7  -5    7.42    1.97
  -2  -7   5   15.17    2.95
   2  -7  -5    9.02    2.35
   2   7  -5    7.06    5.85
  -2   7   5    8.00    2.23
   2   7  -5   11.60    1.92
  -2   7   5    8.81    1.77
   1  -7  -5    0.82    2.02
   1  -7  -5    7.68    2.00
   1  -7  -5    8.41    3.39
  -1  -7   5    2.58    1.89
   1   7  -5    2.43    4.71
   1   7  -5    5.49    1.21
   1   7  -5    2.85    1.80
  -1   7   5    4.39    2.42
  -1   7   5    3.95    1.11
  -1   7   5   -0.27    1.74
   0  -7  -5  216.62   14.13
   0  -7  -5  236.15   18.17
   0  -7   5  241.19   13.34
   0  -7   5  228.35   10.79
   0  -7   5  204.85   17.26
   0  -7  -5  241.41   14.21
   0  -7   5  213.74   13.50
   0   7  -5  224.46   18.06
   0   7   5  231.10   13.89
   0   7  -5  217.71   13.60
   0   7   5  220.09   12.96
   0   7   5  236.21   17.55
   0   7  -5  233.31   10.80
   1  -7   5    0.69    1.25
   1  -7   5    0.48    1.76
  -1  -7  -5    0.33    1.97
   1  -7   5    0.75    1.46
   1  -7   5    2.40    1.87
  -1  -7  -5   -6.31    3.08
   1   7   5   -0.59    2.94
   1   7   5    2.00    3.13
   1   7   5    0.80    1.71
  -1   7  -5   -3.15    4.72
  -1   7  -5    3.80    1.54
   2  -7   5  342.17   19.72
   2  -7   5  335.02   15.39
  -2  -7  -5  309.35   19.64
   2  -7   5  325.54   19.09
   2  -7   5  317.04   24.20
  -2  -7  -5  305.42   19.33
   2  -7   5  313.11   18.77
  -2   7  -5  341.02   15.50
   2   7   5  311.46   18.73
   2   7   5  326.23   19.61
   2   7   5  313.51   24.45
  -2   7  -5  338.94   15.04
   3  -7   5    2.88    2.71
   3  -7   5    1.49    2.53
  -3  -7  -5    4.66    2.49
  -3  -7  -5    4.20    3.38
   3  -7   5    2.15    2.57
  -3   7  -5    3.74    2.00
   3   7   5    5.84    4.26
   3   7   5   -0.65    2.98
   3   7   5   10.65    6.25
  -3   7  -5    6.65    1.92
  -4  -7  -5    8.86    1.96
   4  -7   5    8.99    3.05
   4  -7   5    9.86    2.96
   4   7   5   13.87    7.09
  -4   7  -5   10.82    2.34
   4   7   5   14.23    4.16
  -5  -7  -5   -0.48    2.28
   5  -7   5   -0.69    3.58
   5  -7   5    0.71    3.38
   5   7   5    0.17    4.18
  -5   7  -5    1.26    2.35
   6  -7   5   16.08    4.21
  -6  -7  -5   15.02    3.31
  -6   7  -5   16.73    2.98
   6   7   5    7.86    5.43
   7  -7   5    5.99    4.18
  -7   7  -5    5.77    3.21
   7   7   5    1.02    6.99
   7  -8  -5   -7.74    7.43
  -7  -8   5   -5.87    4.59
  -7  -8   5    8.90    4.17
  -7   8   5    1.33    5.15
  -7   8   5    7.52    4.75
   6  -8  -5   -5.78    5.69
  -6  -8   5   -1.60    3.80
  -6   8   5    2.41    3.69
  -6   8   5    0.40    3.58
  -5  -8   5   18.71    3.86
   5  -8  -5   19.46    4.93
  -5   8   5   19.30    3.21
   5   8  -5   17.31    3.49
  -5   8   5   18.93    3.38
   4  -8  -5   30.33    5.97
  -4  -8   5   35.71    4.91
   4  -8  -5   28.98    3.66
   4   8  -5   25.57    5.54
   4   8  -5   27.85    3.72
   4   8  -5   25.94    9.61
  -4   8   5   32.28    4.18
  -4   8   5   36.81    3.87
   3  -8  -5   93.57    7.45
  -3  -8   5   91.72    6.83
  -3   8   5   83.76    5.45
   3   8  -5   92.50   12.99
  -3   8   5   87.66    5.29
  -2  -8   5   70.50    5.69
   2  -8  -5   77.37    5.99
   2  -8  -5   75.87    6.18
  -2   8   5   69.91    4.16
   2   8  -5   66.30    3.73
  -2   8   5   70.98    4.76
   2   8  -5   91.12   10.69
   1  -8  -5  115.44    7.99
   1  -8  -5  110.30    8.17
   1  -8  -5  114.79   10.54
  -1  -8   5   88.59    6.14
  -1  -8   5  119.70    7.23
  -1   8   5  113.33    6.35
  -1   8   5  114.44    7.67
  -1   8   5  115.86    5.41
   1   8  -5  100.93    7.43
  -1   8   5  110.68   10.11
   1   8  -5  116.85   10.92
   1   8  -5  103.38    5.60
   0  -8  -5   15.11    5.59
   0  -8  -5    9.55    4.36
   0  -8  -5   10.30    2.46
   0  -8   5    7.91    2.24
   0  -8   5    4.57    2.40
   0  -8   5    7.40    1.78
   0  -8   5    7.62    2.07
   0   8  -5    6.94    3.31
   0   8   5    9.43    3.81
   0   8   5    7.57    1.60
   0   8  -5    8.24    5.11
   0   8   5    7.44    2.29
   0   8  -5    9.83    1.65
   0   8   5    9.76    2.72
   1  -8   5   15.67    2.35
   1  -8   5   15.30    3.04
   1  -8   5   16.07    3.29
  -1  -8  -5    8.52    4.47
  -1  -8  -5   17.28    2.79
   1  -8   5   16.98    2.94
   1  -8   5   24.94    4.74
  -1   8  -5   13.68    5.85
  -1   8  -5   20.59    2.71
   1   8   5   15.91    2.93
   1   8   5   18.20    4.24
   1   8   5   19.50    3.60
   2  -8   5    5.95    2.31
   2  -8   5    4.34    2.10
   2  -8   5    4.31    2.19
  -2  -8  -5    2.40    2.66
   2  -8   5    7.67    2.19
   2  -8   5    3.25    2.71
  -2  -8  -5    6.38    3.50
   2   8   5    8.89    3.94
   2   8   5    7.04    2.87
   2   8   5    2.78    4.58
  -2   8  -5    6.92    2.04
  -2   8  -5    6.85    2.17
   3  -8   5   57.93    5.74
  -3  -8  -5   38.20    6.19
   3  -8   5   46.67    5.12
   3  -8   5   53.75    4.98
  -3  -8  -5   59.85    5.70
  -3   8  -5   55.76    4.03
   3   8   5   51.99    9.06
   3   8   5   38.90    7.04
  -3   8  -5   55.53    4.12
  -4  -8  -5   64.99    6.39
  -4  -8  -5   50.48    3.84
   4  -8   5   57.69    6.19
   4  -8   5   58.09    6.50
   4   8   5   51.19    7.59
   4   8   5   60.68   10.65
  -4   8  -5   62.00    4.44
  -5  -8  -5   73.38    4.89
   5  -8   5   78.39    8.11
   5  -8   5   78.61    7.15
   5   8   5   60.03   12.35
   5   8   5   56.80    8.01
  -5   8  -5   79.82    5.35
   6  -8   5   24.76    4.91
   6   8   5   20.31    6.78
  -6   8  -5   21.93    3.44
   6   8   5   -1.91   12.52
   7  -8   5   25.04    5.62
   7   8   5  -14.84   15.21
   7   8   5    8.35    8.61
   7  -9  -5   13.54    8.60
  -6  -9   5   17.12    3.80
  -6  -9   5   25.67    4.90
   6  -9  -5    9.26    6.48
  -6   9   5   15.69    3.96
  -6   9   5   23.93    4.44
   5  -9  -5   53.73    8.18
  -5  -9   5   55.84    6.51
  -5   9   5   51.48    5.65
  -5   9   5   54.77    5.20
   4  -9  -5   15.62    4.25
  -4  -9   5   13.91    3.24
  -4   9   5   23.83    3.71
  -4   9   5   22.88    3.72
   4   9  -5   12.64    9.14
   3  -9  -5    0.27    2.99
  -3  -9   5    1.69    3.01
  -3   9   5    5.67    2.40
  -3   9   5    1.00    2.51
   3   9  -5    7.50    8.32
   2  -9  -5   -2.69    2.59
  -2  -9   5    0.06    2.64
  -2   9   5    1.10    1.87
   2   9  -5    1.76    1.40
   2   9  -5    1.23    6.78
  -2   9   5   -0.42    2.20
  -1  -9   5   60.85    4.77
  -1  -9   5   53.83    4.52
   1  -9  -5   56.01    5.64
   1  -9  -5   48.78    7.01
   1   9  -5   64.23    9.41
   1   9  -5   53.78    3.56
  -1   9   5   55.08    7.66
  -1   9   5   57.50    3.34
  -1   9   5   54.27    4.76
  -1   9   5   62.09    5.66
   1   9  -5   50.80    5.22
   0  -9   5   61.12    4.57
   0  -9  -5   44.68    7.98
   0  -9  -5   63.25    5.80
   0  -9   5   66.37    4.35
   0  -9   5   68.07    4.86
   0  -9  -5   69.87   10.44
   0   9   5   59.66    4.22
   0   9   5   56.73    7.89
   0   9  -5   46.84    9.37
   0   9   5   63.44    4.68
   0   9   5   57.84    5.64
   0   9  -5   64.18    4.11
   0   9  -5   58.28    6.63
  -1  -9  -5  144.73    9.85
   1  -9   5  145.38    7.71
   1  -9   5  147.41    9.93
   1  -9   5  136.67    8.86
   1  -9   5  141.70    8.94
  -1   9  -5  141.36   14.18
  -1   9  -5  141.75    7.49
   1   9   5  149.87    9.72
   1   9   5  143.74   12.61
   1   9   5  131.94    8.87
  -2  -9  -5   27.00    4.79
  -2  -9  -5   26.63    4.68
   2  -9   5   39.25    4.18
   2  -9   5   39.32    5.26
   2  -9   5   32.63    3.91
  -2   9  -5   31.42    7.71
   2   9   5   28.35    7.68
  -2   9  -5   39.79    3.94
   2   9   5   29.51    5.02
  -2   9  -5   35.71    3.74
   2   9   5   27.40    5.66
  -3  -9  -5   70.79    6.48
  -3  -9  -5   63.60    7.18
   3  -9   5   76.75    6.07
   3  -9   5   61.30    6.02
   3  -9   5   76.23    7.11
   3   9   5   69.49    8.35
  -3   9  -5   64.36    4.76
  -3   9  -5   73.78    5.21
   3   9   5   69.98   10.29
  -4  -9  -5    7.90    3.30
   4  -9   5    7.04    3.19
   4  -9   5    3.20    3.99
   4  -9   5    7.31    3.42
  -4   9  -5    8.56    2.70
   4   9   5   10.39    8.59
   4   9   5    1.70    5.42
  -4   9  -5    6.13    2.39
   5  -9   5    6.09    3.93
  -5  -9  -5    7.85    4.24
   5  -9   5    6.42    5.16
   5   9   5   -2.55    6.05
   5   9   5   14.61    8.89
  -5   9  -5    0.20    2.92
   6  -9   5    2.22    4.11
  -6   9  -5    5.74    3.39
   6   9   5    2.59    7.36
   6   9   5    4.80   10.67
  -6 -10   5    3.07    4.18
  -6 -10   5    2.68    4.98
   6 -10  -5   -8.86    6.52
  -6  10   5    0.84    4.51
  -6  10   5   -5.02    4.37
  -5 -10   5    0.05    4.19
   5 -10  -5    4.20    4.96
  -5  10   5    4.30    3.53
   5  10  -5    4.87    9.09
  -5  10   5    1.95    3.04
   4 -10  -5   59.34    7.75
  -4 -10   5   70.99    6.80
   4  10  -5   71.27   12.96
  -4  10   5   69.60    5.63
  -4  10   5   67.17    5.39
   3 -10  -5    0.96    3.15
  -3 -10   5    0.97    3.21
   3  10  -5   10.55    8.62
  -3  10   5   -0.35    2.35
  -3  10   5    0.80    2.60
  -2 -10   5  159.34   10.10
   2 -10  -5  157.20   10.86
   2  10  -5  143.67    7.67
   2  10  -5  147.19   14.81
  -2  10   5  159.88    8.58
  -2  10   5  157.86    7.67
   1 -10  -5   -0.07    2.89
  -1 -10   5    3.22    2.83
  -1 -10   5    3.78    2.52
   1 -10  -5    7.65    5.40
  -1  10   5    1.20    4.85
   1  10  -5    1.56    2.04
   1  10  -5    0.78    3.74
   1  10  -5    1.45    6.34
  -1  10   5    0.45    2.51
  -1  10   5    0.90    1.46
   0 -10  -5   22.38    3.65
   0 -10   5   28.42    3.91
   0 -10   5   25.02    4.02
   0 -10  -5   22.40    6.84
   0  10  -5   30.14    7.17
   0  10   5   33.82    4.83
   0  10  -5   30.37    3.60
   0  10   5   29.83    7.28
   0  10   5   20.56    3.12
   0  10  -5   13.14    5.24
   1 -10   5    2.55    2.45
  -1 -10  -5   -2.64    2.84
   1 -10   5   -3.73    2.38
   1 -10   5    6.05    2.94
  -1 -10  -5    0.56    5.52
   1 -10   5   -0.03    3.65
   1 -10   5    0.41    3.05
   1  10   5   -0.08    3.44
   1  10   5    3.16    2.89
   1  10   5    4.49    5.17
  -1  10  -5    2.49    2.24
  -1  10  -5   -7.63    6.90
  -2 -10  -5    4.33    3.07
   2 -10   5   -0.23    2.70
   2 -10   5    2.32    2.61
   2 -10   5    0.10    3.59
  -2 -10  -5    2.36    4.44
   2  10   5   -0.15    3.72
   2  10   5   -1.73    5.65
   2  10   5    5.89    4.56
  -2  10  -5    4.35    7.64
  -2  10  -5    4.53    2.60
   3 -10   5    1.83    2.64
   3 -10   5    0.61    3.03
  -3 -10  -5    1.34    3.66
  -3 -10  -5    4.54    4.81
   3 -10   5    0.58    3.99
  -3  10  -5    1.74    2.88
  -3  10  -5    6.01    2.42
   3  10   5    2.27    6.84
   3  10   5   -0.40    4.83
   4 -10   5   87.63    9.78
   4 -10   5  111.04    8.06
  -4 -10  -5   97.18    8.62
   4 -10   5   98.12    7.98
  -4  10  -5  109.82    6.39
   4  10   5  103.75   14.40
  -4  10  -5   98.03    6.31
   4  10   5   83.50    9.91
   5 -10   5    2.16    4.48
   5 -10   5    1.73    4.78
   5 -10   5   -2.23    5.57
  -5 -10  -5    9.48    4.86
   5  10   5    1.56    6.85
   5  10   5    6.81    9.94
  -5  10  -5   -0.03    3.23
   6 -10   5   55.05    8.53
  -6 -10  -5   57.16    9.92
  -6  10  -5   57.95    6.22
   6  10   5   76.22   15.93
   6 -11  -5    3.99    7.67
  -6 -11   5   13.78    5.78
  -6  11   5    9.52    5.04
  -5 -11   5   41.53    6.45
   5 -11  -5   38.49    6.54
  -5  11   5   51.51    5.58
  -5  11   5   51.32    5.22
   5  11  -5   37.05   10.97
  -4 -11   5    8.48    3.52
   4 -11  -5    7.65    4.40
  -4  11   5    8.35    2.82
   4  11  -5   16.59    9.49
  -4  11   5    8.47    3.34
   3 -11  -5    7.53    3.46
  -3 -11   5   10.08    3.61
  -3  11   5    6.56    2.81
   3  11  -5   28.62    9.00
  -3  11   5    6.66    2.61
  -2 -11   5    4.03    3.91
  -2 -11   5    0.85    3.02
   2 -11  -5   -0.97    3.04
  -2  11   5   -3.58    2.44
   2  11  -5    1.13    1.92
  -2  11   5    1.83    2.02
   2  11  -5   11.42    7.61
  -1 -11   5   50.06    5.47
  -1 -11   5   62.93    5.70
   1 -11  -5   53.50    5.74
  -1  11   5   54.36    8.95
   1  11  -5   59.84    9.21
  -1  11   5   59.16    4.80
  -1  11   5   58.35    3.37
   1  11  -5   54.36    4.42
   0 -11   5   24.55    3.77
   0 -11   5   27.55    4.41
   0 -11  -5   13.63    7.05
   0 -11  -5   23.98    3.90
   0  11  -5   17.55    6.11
   0  11   5   21.89    3.33
   0  11   5   31.38    8.07
   0  11  -5   44.70    9.83
   0  11   5   26.11    5.50
   0  11  -5   23.87    4.00
  -1 -11  -5  103.73   11.79
   1 -11   5  152.12    8.94
   1 -11   5  125.82    8.80
  -1 -11  -5  139.00   10.05
   1 -11   5  138.68   10.47
   1  11   5  133.65    9.13
  -1  11  -5  134.23   15.25
   1  11   5  139.12   13.41
   1  11   5  132.22    9.92
  -1  11  -5  149.13    7.77
   1  11   5  147.36    8.58
   2 -11   5   49.80    6.82
  -2 -11  -5   43.12    5.93
  -2 -11  -5   32.89    7.09
   2 -11   5   37.32    4.58
   2 -11   5   39.00    5.08
   2  11   5   30.47    6.33
   2  11   5   37.28    6.45
  -2  11  -5   41.58    4.80
   2  11   5   52.70    9.16
  -2  11  -5   44.59   11.86
   3 -11   5   49.04    7.53
   3 -11   5   42.38    5.49
  -3 -11  -5   44.32    6.56
   3 -11   5   38.33    5.35
   3  11   5   52.29   10.59
  -3  11  -5   44.09    4.71
  -3  11  -5   40.38    4.47
   3  11   5   30.99    6.21
   4 -11   5    4.75    3.76
   4 -11   5    0.40    5.17
  -4 -11  -5    1.79    4.26
   4 -11   5    2.79    4.23
   4  11   5   13.15    9.24
  -4  11  -5    7.94    2.88
  -4  11  -5   -0.84    3.09
   4  11   5    4.71    6.58
   5 -11   5    8.12    5.29
  -5 -11  -5    4.38    5.53
   5 -11   5    1.90    6.94
   5  11   5   18.11   10.84
  -5  11  -5    6.95    3.78
   6 -11   5    9.87    6.04
  -6 -11  -5    1.69    6.06
  -6  11  -5    4.39    4.39
   6  11   5    5.08   13.54
  -5 -12   5   14.20    5.22
   5 -12  -5    1.44    5.99
  -5  12   5   11.90    4.74
   5  12  -5   29.68   10.99
  -4 -12   5   20.43    4.19
   4 -12  -5   13.74    4.92
  -4  12   5   17.02    3.81
  -4  12   5   14.94    3.66
   4  12  -5   28.16    9.30
   3 -12  -5   60.03    6.42
  -3 -12   5   53.09    6.07
   3  12  -5   81.06   12.79
  -3  12   5   61.67    5.06
  -3  12   5   62.79    4.92
  -2 -12   5   61.09    6.05
   2 -12  -5   60.31    6.45
   2  12  -5   65.41   11.65
  -2  12   5   58.80    4.08
   2  12  -5   46.96    4.33
  -2  12   5   57.75    4.88
  -1 -12   5   52.95    5.80
   1 -12  -5   54.61    5.92
   1  12  -5   51.94    4.91
   1  12  -5   67.64   10.93
  -1  12   5   63.06    9.79
  -1  12   5   51.70    5.52
   0 -12  -5   -5.28    8.30
   0 -12  -5    5.13    3.43
   0 -12   5   13.83    3.10
   0 -12   5    9.95    3.62
   0  12   5   11.63    6.39
   0  12   5    5.70    3.26
   0  12  -5   15.20    3.03
   0  12  -5   25.67    8.21
   1 -12   5    1.38    2.75
   1 -12   5    1.20    4.45
   1 -12   5    3.84    2.97
  -1 -12  -5    4.87    3.15
  -1  12  -5    7.94    2.91
   1  12   5   10.90    4.49
   1  12   5   -4.37    3.61
  -1  12  -5   -0.46    8.22
   1  12   5    5.64    6.92
  -2 -12  -5   10.97    3.93
   2 -12   5   12.99    3.25
   2 -12   5   10.13    4.41
   2 -12   5    4.41    3.27
   2  12   5    7.58    7.09
  -2  12  -5    1.04    9.40
  -2  12  -5   13.75    3.30
   2  12   5    4.60    5.17
   3 -12   5   24.37    4.12
  -3 -12  -5   21.78    4.71
   3 -12   5   19.26    5.24
   3 -12   5   18.06    3.82
   3  12   5   19.46    5.82
   3  12   5   35.54    8.63
  -3  12  -5   21.00    3.77
   4 -12   5   40.58    6.77
  -4 -12  -5   39.04    7.72
   4 -12   5   25.11    6.74
   4  12   5   41.20   10.83
  -4  12  -5   31.41    4.32
  -4  12  -5   29.51    4.25
  -5 -12  -5   25.86    6.23
   5 -12   5   25.98    5.92
   5  12   5   39.82   12.75
  -5  12  -5   29.92    4.65
   5 -13  -5    1.53    6.73
  -5 -13   5    6.67    5.76
   4 -13  -5   10.65    5.35
  -4 -13   5   19.39    5.00
  -4  13   5   18.68    3.58
   3 -13  -5   -2.57    3.72
  -3 -13   5    3.21    4.01
  -3  13   5    1.94    3.42
   3  13  -5   18.70    9.73
   2 -13  -5    4.89    3.65
  -2 -13   5    5.03    3.58
  -2  13   5    3.39    3.44
   2  13  -5    7.49    8.57
  -1 -13   5   -2.07    3.51
   1 -13  -5   -7.12    3.58
  -1  13   5    5.24    7.09
   1  13  -5    1.82    3.12
  -1  13   5   -1.79    3.77
   1  13  -5    2.66    7.37
   0 -13   5   85.57    9.32
   0 -13   5   83.32    7.03
   0 -13  -5   83.01    7.95
   0  13   5   99.58    6.75
   0  13  -5   78.62    6.26
   0  13  -5   92.77   13.76
   0  13   5   91.95   11.51
   1 -13   5    0.68    2.88
   1 -13   5   -1.61    4.83
  -1 -13  -5    3.73    3.47
   1  13   5    8.28    7.61
   1  13   5    1.12    4.98
  -1  13  -5    3.87    3.26
   1  13   5   -7.46    4.60
  -1  13  -5   15.09    8.93
   2 -13   5   84.17    6.93
   2 -13   5   84.48    9.50
  -2 -13  -5   98.22    8.67
   2  13   5   71.79    8.27
  -2  13  -5   84.66    6.96
  -2  13  -5   78.39   15.27
   2  13   5   92.26   12.69
   3 -13   5    2.27    6.37
  -3 -13  -5   10.42    4.90
   3 -13   5    7.71    4.59
   3  13   5   13.34    9.25
  -3  13  -5    1.26    3.95
   4 -13   5    9.18    7.25
   4 -13   5   11.04    5.31
  -4 -13  -5   12.03    6.47
  -4  13  -5   12.53    4.32
  -4  13  -5    6.11    4.16
   4  13   5   20.36   11.15
   5 -13   5   -4.15    6.81
  -5 -13  -5    8.32    6.55
   5  13   5    7.89   14.09
  -5  13  -5    3.48    5.07
   4 -14  -5   -4.24    4.93
  -4 -14   5    7.67    5.23
   4  14  -5   14.76   10.87
  -4  14   5    8.48    3.76
   3 -14  -5   63.94    8.11
  -3 -14   5   73.78    8.05
   3  14  -5   73.36   14.81
  -3  14   5   76.36    6.09
   2 -14  -5    2.52    4.14
  -2 -14   5   10.89    4.48
  -2  14   5    7.05    3.45
   2  14  -5   20.41    9.61
   1 -14  -5   71.80    7.76
  -1 -14   5   76.56    7.28
  -1  14   5   69.45    6.37
   1  14  -5   78.24   13.08
  -1  14   5   75.39   12.27
   1  14  -5   72.69    6.45
   0 -14  -5   -0.82    3.44
   0 -14   5   -0.24    3.68
   0 -14   5    9.95    5.65
   0  14  -5    2.86    3.96
   0  14  -5   10.36    9.51
   0  14   5    0.32    4.73
   0  14   5    5.73    7.61
   1 -14   5    3.32    5.72
  -1 -14  -5    4.96    3.97
   1  14   5   10.63    8.46
  -1  14  -5    5.03    4.18
  -1  14  -5   12.19    9.80
   1  14   5   -3.89    5.22
  -2 -14  -5    3.96    4.80
   2 -14   5   -1.28    5.86
  -2  14  -5    0.88    3.97
   2  14   5   16.07    9.32
   2  14   5   -3.99    5.96
   3 -14   5   28.31    8.24
  -3 -14  -5   56.69    8.71
   3  14   5   36.24    7.20
   3  14   5   38.20   11.29
  -3  14  -5   46.22    7.06
  -4 -14  -5    5.48    6.63
   4 -14   5    0.46    8.65
   4  14   5   23.76   12.57
  -4  14  -5   -0.77    4.18
   3 -15  -5   -7.88    4.85
  -3 -15   5    4.78    5.06
   3  15  -5   11.69   10.21
  -3  15   5    3.28    3.94
  -2 -15   5    2.79    4.28
   2 -15  -5   -1.47    3.81
  -2  15   5    5.80    3.94
   2  15  -5   18.93   11.05
   1 -15  -5   15.15    4.83
  -1 -15   5   21.24    6.50
  -1  15   5   10.90    4.52
   1  15  -5   15.13   10.84
   0 -15  -5   12.97    4.42
   0 -15   5   24.51    5.97
   0  15  -5   17.90    9.58
   0  15  -5   18.14    4.79
   0  15   5   15.61    8.81
   0  15   5   17.80    5.69
   1 -15   5   28.26    6.96
  -1 -15  -5   40.27    7.81
  -1  15  -5   28.26    9.87
   1  15   5   20.72    5.75
  -1  15  -5   18.75    4.58
   1  15   5   34.30   10.25
   2 -15   5   28.05    7.67
  -2 -15  -5   53.22    8.99
   2  15   5   55.92   14.53
  -2  15  -5   47.77    7.42
   2  15   5   40.72    6.47
  -3 -15  -5   10.36    6.34
   3 -15   5    9.69    8.20
  -3  15  -5   12.88    5.42
   3  15   5   24.35   12.25
   3  15   5   10.34    7.71
  -2  16   5   45.32    6.89
   1 -16  -5    4.94    4.50
  -1 -16   5    6.06    6.24
  -1  16   5    4.14    5.88
   1  16  -5   -4.28   10.75
   0 -16   5    5.18    7.48
   0 -16  -5   13.97    4.81
   0  16  -5   14.20   10.70
   0  16   5   14.97    5.87
   0  16   5   20.82   10.35
   1 -16   5    4.24    6.68
  -1 -16  -5    2.42    5.81
  -1  16  -5    6.46   12.56
   1  16   5   15.40   10.12
   1  16   5    3.14    6.18
  -1  16  -5   -2.22    4.95
  -2 -16  -5    8.62    6.23
   2 -16   5    9.90    8.53
  -2  16  -5    4.13    5.72
   2  16   5   10.91    8.16
   2  16   5    1.34   11.32
  -8   0   6   16.07    6.18
  -8   0   6   16.67    4.00
   8   0  -6    6.74    7.18
  -7   0   6   -2.59    2.60
   7   0  -6   -8.91    5.28
  -7   0   6    2.52    3.93
  -6   0   6    1.59    3.27
   5   0  -6    1.23    3.40
  -5   0   6    1.32    2.12
  -5   0   6    2.80    3.06
   5   0  -6    7.63    2.92
   4   0  -6  185.39   11.44
  -4   0   6  202.36   11.73
   4   0  -6  194.78    9.43
   4   0  -6  186.09   12.74
   4   0  -6  192.72   11.90
  -4   0   6  190.47    9.40
   3   0  -6   -0.08    1.33
   3   0  -6    1.99    1.61
   3   0  -6    1.52    2.76
  -3   0   6   -1.63    1.57
  -3   0   6   -0.51    1.62
  -3   0   6    1.71    1.16
   2   0  -6  529.33   31.79
  -2   0   6  540.03   30.96
   2   0  -6  562.90   30.94
  -2   0   6  541.16   24.60
   2   0  -6  501.01   30.09
  -2   0   6  546.09   31.72
  -2   0   6  506.29   30.14
   1   0  -6    0.22    1.24
  -1   0   6    0.78    2.86
  -1   0   6    1.04    1.81
   1   0  -6    0.33    1.95
  -1   0   6   -0.53    1.97
   0   0  -6   18.37    3.84
   0   0   6   13.66    2.74
   0   0   6   15.60    3.57
   0   0   6    9.06    2.20
   1   0   6   -0.17    1.46
   1   0   6    0.86    2.50
  -1   0  -6   -2.29    1.88
   1   0   6    0.93    1.07
   2   0   6   48.58    4.41
  -2   0  -6   57.13    3.34
   2   0   6   57.76    3.02
  -2   0  -6   44.93    3.98
   3   0   6   -1.46    1.02
   3   0   6   -1.37    1.80
  -3   0  -6    0.44    1.21
  -3   0  -6   -1.44    1.33
   4   0   6  250.92   15.36
  -4   0  -6  247.84   11.72
  -5   0  -6    4.51    2.10
   5   0   6    1.05    2.96
   6   0   6   79.02    6.65
  -6   0  -6   71.03    5.22
  -7   0  -6   -4.01    3.08
   7   0   6    2.11    4.11
  -8   0  -6   -5.38    4.10
   8  -1  -6   -4.09    7.29
  -8  -1   6   11.64    3.52
  -8  -1   6    7.25    5.19
  -8   1   6    5.81    3.29
  -8   1   6    5.19    6.14
  -7  -1   6   76.94    5.57
  -7  -1   6   81.66    7.16
   7  -1  -6   47.45    9.52
  -7   1   6   72.25    7.27
  -7   1   6   68.86    5.34
   7   1  -6   52.97    9.17
  -6  -1   6   38.17    5.01
   6  -1  -6   16.71    5.01
  -6   1   6   29.06    3.33
  -6   1   6   28.54    4.39
  -6   1   6   33.32    5.25
   5  -1  -6   94.65    9.17
  -5  -1   6  107.98    7.28
   5  -1  -6  105.43    6.60
  -5   1   6  101.28    7.19
   5   1  -6   98.02    6.10
   5   1  -6   94.40    8.96
  -5   1   6   99.29    6.13
   4  -1  -6    7.81    2.35
  -4  -1   6    9.83    1.83
   4  -1  -6    9.45    3.04
  -4  -1   6   11.69    2.67
   4  -1  -6    9.88    2.13
  -4   1   6   10.44    2.57
   4   1  -6    7.69    2.92
  -4   1   6   11.23    1.80
   4   1  -6    9.51    1.76
   4   1  -6   10.38    2.72
  -3  -1   6   -1.22    1.74
  -3  -1   6    0.25    1.13
   3  -1  -6    1.95    1.46
   3  -1  -6    3.56    2.69
  -3  -1   6    1.88    1.72
   3  -1  -6   -0.56    1.40
   3   1  -6   -0.85    1.02
  -3   1   6    1.55    1.58
  -3   1   6    0.98    1.41
   3   1  -6    2.73    2.66
  -3   1   6   -0.99    1.47
   3   1  -6    0.13    1.61
   2  -1  -6   21.11    2.23
  -2  -1   6   17.81    1.80
   2  -1  -6   24.00    2.71
  -2  -1   6   21.42    3.23
  -2  -1   6   22.23    3.08
  -2  -1   6   24.77    3.57
  -2   1   6   22.43    3.03
  -2   1   6   21.06    3.09
   2   1  -6   29.90    4.73
   2   1  -6   25.14    2.34
   2   1  -6   20.14    2.98
  -2   1   6   24.69    2.80
  -2   1   6   22.42    2.26
   1  -1  -6  176.34   10.46
  -1  -1   6  187.06   10.75
   1  -1  -6  168.35   10.97
  -1  -1   6  173.38   11.18
  -1  -1   6  179.38   11.19
   1  -1  -6  177.72   11.38
  -1   1   6  187.52   10.66
   1   1  -6  186.29   11.49
  -1   1   6  173.43   11.05
  -1   1   6  177.52   11.10
   1   1  -6  170.84   10.93
   1   1  -6  164.25   10.35
   0  -1   6   44.24    4.40
   0  -1   6   54.70    4.32
   0  -1   6   57.54    5.59
   0  -1  -6   57.38    5.25
   0  -1  -6   59.83    4.42
   0   1   6   44.55    4.26
   0   1  -6   58.85    4.74
   0   1   6   50.24    5.83
   0   1   6   44.84    4.02
   1  -1   6  385.99   21.85
   1  -1   6  327.32   26.61
  -1  -1  -6  357.74   21.75
   1  -1   6  383.46   21.86
   1  -1   6  375.33   16.90
  -1  -1  -6  369.79   21.87
   1   1   6  375.36   22.03
   1   1   6  361.02   21.84
   1   1   6  372.32   16.87
  -1   1  -6  390.38   21.70
  -2  -1  -6   89.99    5.87
  -2  -1  -6   87.66    4.66
   2  -1   6   88.14    6.18
   2  -1   6   84.40    4.48
   2   1   6   79.38    4.45
  -2   1  -6   90.55    5.87
  -2   1  -6   93.24    4.77
   2   1   6  103.32    6.62
   3  -1   6  127.70    6.34
   3  -1   6  145.19    8.65
  -3  -1  -6  126.65    8.14
  -3  -1  -6  129.53    6.48
   3   1   6  121.42    6.36
   3   1   6  142.02    8.72
  -3   1  -6  132.03    6.53
  -4  -1  -6    3.10    1.70
   4  -1   6    4.58    2.48
   4   1   6    1.98    2.60
   4   1   6    7.38    1.79
  -4   1  -6    4.02    1.57
  -5  -1  -6   12.17    2.31
   5  -1   6   10.63    3.17
   5   1   6    8.27    2.95
  -5   1  -6   17.14    2.33
  -6  -1  -6    6.65    2.69
   6  -1   6   13.99    3.53
   6   1   6   11.88    3.43
  -6   1  -6    8.75    2.69
  -7  -1  -6   57.76    5.34
   7  -1   6   44.18    6.16
   7   1   6   47.69    7.42
  -7   1  -6   63.62    5.37
  -8  -2   6    0.82    4.15
  -8  -2   6    4.49    4.95
   8  -2  -6   -7.02    7.18
  -8   2   6   -6.48    6.12
  -7  -2   6    6.83    2.99
  -7  -2   6    4.30    3.87
  -7   2   6    5.53    4.16
  -7   2   6    7.19    3.06
  -6  -2   6    7.94    3.23
  -6   2   6    8.43    2.96
  -6   2   6    0.64    2.69
   6   2  -6    8.74    4.19
  -6   2   6    6.17    3.43
   5  -2  -6   13.82    3.98
  -5  -2   6   25.83    3.99
   5  -2  -6   30.03    4.44
   5   2  -6   17.32    4.26
  -5   2   6   25.79    4.52
   5   2  -6   21.89    3.60
  -5   2   6   23.31    3.77
   4  -2  -6   62.32    4.18
  -4  -2   6   57.94    4.72
   4  -2  -6   57.10    4.95
   4  -2  -6   54.45    6.44
  -4   2   6   55.52    3.97
   4   2  -6   48.62    6.16
  -4   2   6   61.53    4.88
   4   2  -6   48.92    5.76
  -3  -2   6  183.45   11.97
   3  -2  -6  184.42   10.94
   3  -2  -6  191.73   12.25
  -3  -2   6  178.98    8.74
  -3  -2   6  178.33   11.10
   3  -2  -6  198.77   11.30
   3   2  -6  188.06   12.24
  -3   2   6  189.17    9.06
  -3   2   6  184.57   11.66
  -3   2   6  185.38   11.00
   3   2  -6  189.43   11.38
   3   2  -6  173.95   10.83
  -2  -2   6  139.88    8.82
  -2  -2   6  124.31    6.56
  -2  -2   6  144.62    9.35
   2  -2  -6  149.33    9.57
   2  -2  -6  142.03    8.34
   2  -2  -6  145.47    8.79
  -2  -2   6  136.02    8.53
  -2   2   6  138.18    8.88
  -2   2   6  138.45    8.38
   2   2  -6  136.64    8.31
  -2   2   6  145.40    9.01
  -2   2   6  145.85    7.01
   2   2  -6  138.80    9.69
   2   2  -6  136.55    8.79
   1  -2  -6   51.64    4.15
  -1  -2   6   58.62    5.10
  -1  -2   6   52.78    4.63
   1  -2  -6   56.59    5.04
   1  -2  -6   55.14    4.82
  -1  -2   6   63.63    5.07
  -1   2   6   54.47    4.28
   1   2  -6   66.41    5.67
   1   2  -6   45.77    3.82
  -1   2   6   54.03    5.30
   1   2  -6   56.25    4.75
  -1   2   6   54.84    4.34
   0  -2   6   15.88    3.21
   0  -2  -6   13.61    2.89
   0  -2   6    9.87    2.34
   0  -2  -6   14.76    2.85
   0   2  -6   14.71    3.10
   0   2  -6    8.58    2.06
   0   2   6   14.37    2.50
   0   2   6   14.39    3.40
   0   2   6   12.85    2.38
  -1  -2  -6    4.92    1.34
   1  -2   6    4.85    2.24
   1  -2   6    3.14    2.38
   1  -2   6    6.08    1.60
  -1  -2  -6    4.66    1.90
   1   2   6    5.98    1.32
  -1   2  -6    3.03    1.68
   1   2   6    6.69    1.42
   1   2   6    6.58    3.17
   2  -2   6   15.56    3.20
   2  -2   6   15.76    1.71
   2  -2   6   15.52    3.36
  -2  -2  -6   19.29    2.03
  -2  -2  -6   17.71    2.05
  -2  -2  -6   15.24    2.25
  -2   2  -6   17.94    2.27
   2   2   6   20.34    1.76
   2   2   6   13.61    2.85
  -2   2  -6   15.61    2.11
  -3  -2  -6  133.94    8.49
   3  -2   6  138.86    9.03
  -3  -2  -6  146.05    6.85
   3  -2   6  140.51    6.72
  -3  -2  -6  124.01    8.59
   3  -2   6  140.04    7.08
   3   2   6  145.06    9.23
   3   2   6  150.68    6.89
  -3   2  -6  144.03    6.94
  -4  -2  -6   30.40    2.81
  -4  -2  -6   34.14    3.14
  -4  -2  -6   27.82    4.25
   4  -2   6   31.92    4.21
   4   2   6   29.71    3.25
   4   2   6   37.63    4.61
  -4   2  -6   33.80    3.02
  -5  -2  -6  158.24   10.32
   5  -2   6  147.66   10.33
  -5  -2  -6  156.53    8.12
  -5   2  -6  155.81    8.04
   5   2   6  162.98   10.81
  -6  -2  -6   30.56    4.03
   6  -2   6   38.30    4.76
   6   2   6   41.40    6.20
  -6   2  -6   39.78    4.00
  -7  -2  -6   18.39    3.58
   7  -2   6   30.03    5.67
   7   2   6   18.07    5.44
  -7   2  -6   21.48    3.14
   8  -3  -6    5.45    7.66
  -8  -3   6   16.39    4.77
  -8  -3   6   28.94    5.55
  -7  -3   6    7.08    3.81
  -7  -3   6    9.98    3.55
   7  -3  -6  -10.71    5.42
  -7   3   6    1.20    3.07
  -7   3   6    4.42    3.96
  -7   3   6    7.16    4.93
  -6  -3   6  101.63    7.57
  -6   3   6  101.82    8.12
  -6   3   6   98.97    6.82
  -6   3   6   93.92    6.21
   5  -3  -6    0.01    3.95
  -5  -3   6    0.62    3.00
  -5   3   6    2.63    3.10
   5   3  -6    4.55    2.08
   5   3  -6    2.76    3.59
  -5   3   6    4.49    2.86
   4  -3  -6   34.74    4.31
  -4  -3   6   46.70    4.20
   4  -3  -6   43.47    5.98
   4  -3  -6   37.44    3.93
  -4   3   6   44.00    3.73
   4   3  -6   38.75    5.76
  -4   3   6   45.00    4.26
   4   3  -6   42.19    5.22
  -3  -3   6   -2.30    2.31
   3  -3  -6    1.87    1.51
   3  -3  -6    3.79    2.60
  -3  -3   6    3.39    1.85
   3  -3  -6    4.82    1.92
  -3   3   6    4.85    1.76
   3   3  -6    2.81    2.53
  -3   3   6    3.45    1.45
   3   3  -6    0.11    1.11
  -3   3   6    3.24    1.70
   3   3  -6    0.85    2.67
   2  -3  -6   33.18    3.46
  -2  -3   6   33.28    3.47
  -2  -3   6   37.58    3.64
  -2  -3   6   37.13    4.52
   2  -3  -6   36.52    4.48
   2  -3  -6   36.92    3.01
   2   3  -6   37.80    2.94
  -2   3   6   37.03    3.98
  -2   3   6   38.29    3.06
   2   3  -6   36.59    3.73
  -2   3   6   33.85    3.13
   2   3  -6   32.44    4.84
  -2   3   6   36.45    3.06
   1  -3  -6   12.82    2.42
  -1  -3   6   21.23    4.02
   1  -3  -6   12.44    2.39
   1  -3  -6    9.53    2.93
  -1  -3   6    9.40    2.87
  -1  -3   6   14.01    2.13
  -1   3   6   10.10    2.57
   1   3  -6   16.14    3.44
  -1   3   6   14.78    2.88
  -1   3   6   15.13    2.34
   1   3  -6   17.81    2.27
   0  -3   6  344.76   19.62
   0  -3  -6  322.38   19.60
   0  -3  -6  313.48   24.06
   0  -3   6  317.68   15.28
   0  -3   6  319.22   19.06
   0  -3  -6  336.83   19.70
   0  -3   6  338.25   19.75
   0   3   6  323.99   19.76
   0   3   6  315.26   18.87
   0   3  -6  332.52   18.99
   0   3  -6  329.99   24.24
   0   3  -6  345.84   19.27
   0   3   6  317.67   19.60
   1  -3   6    6.74    1.33
   1  -3   6    4.19    2.29
   1  -3   6    1.78    2.50
   1  -3   6    5.04    1.24
  -1  -3  -6    5.99    1.60
  -1  -3  -6    1.44    2.12
   1  -3   6    4.00    1.91
   1  -3   6    5.08    1.89
   1   3   6    7.34    1.43
   1   3   6    3.18    3.24
  -1   3  -6    2.55    2.67
   1   3   6    3.94    1.33
  -1   3  -6    5.50    1.61
   2  -3   6  262.31   15.10
  -2  -3  -6  264.34   15.04
   2  -3   6  244.41   11.97
   2  -3   6  242.86   18.61
   2  -3   6  272.24   15.01
   2  -3   6  263.49   14.94
   2  -3   6  240.00   11.63
  -2  -3  -6  223.48   15.03
   2   3   6  255.86   18.81
   2   3   6  230.23   11.54
  -2   3  -6  261.97   14.97
   2   3   6  261.90   15.40
  -2   3  -6  249.19   11.76
   3  -3   6    9.94    1.56
   3  -3   6    7.08    3.20
  -3  -3  -6    8.00    1.57
   3  -3   6    6.40    1.32
  -3  -3  -6    4.80    1.64
   3  -3   6   10.80    2.29
  -3  -3  -6    8.35    1.67
   3   3   6    7.88    1.38
  -3   3  -6    9.28    1.54
   3   3   6    8.83    1.67
   3   3   6    9.46    2.81
  -4  -3  -6    0.73    1.60
  -4  -3  -6   -0.44    1.64
   4  -3   6    2.99    2.14
  -4  -3  -6    1.80    2.94
  -4   3  -6    3.40    1.86
   4   3   6    3.04    2.03
   4   3   6    1.25    2.96
  -5  -3  -6   -0.28    3.72
   5  -3   6    3.79    2.81
  -5  -3  -6   -0.87    2.31
   5   3   6    1.11    3.44
  -5   3  -6   -1.61    1.99
  -6  -3  -6   43.08    4.30
   6  -3   6   42.28    5.43
   6   3   6   36.78    6.66
  -6   3  -6   48.22    4.21
   7  -3   6    8.82    3.90
  -7  -3  -6   13.25    3.48
   7   3   6    3.05    4.66
  -7   3  -6    4.14    3.05
  -7  -4   6    2.21    3.55
  -7  -4   6   -1.78    4.12
  -7   4   6    1.81    5.02
  -7   4   6    0.19    4.04
  -7   4   6    3.56    3.37
   6  -4  -6   -5.25    4.67
  -6  -4   6    4.60    3.09
  -6   4   6    6.52    3.30
  -6   4   6    4.53    2.67
  -6   4   6    7.78    4.30
   5  -4  -6   74.88    6.66
  -5  -4   6   77.20    6.40
   5  -4  -6   65.90    7.95
  -5   4   6   75.75    5.61
   5   4  -6   64.82    4.40
  -5   4   6   83.83    5.14
  -5   4   6   79.11    6.32
  -4  -4   6   13.54    2.61
   4  -4  -6   12.34    2.80
   4  -4  -6   10.60    2.59
   4  -4  -6   11.64    3.57
  -4   4   6   13.61    2.37
  -4   4   6   15.87    2.87
   4   4  -6   11.43    3.70
  -3  -4   6  200.50   13.36
   3  -4  -6  215.76   13.62
   3  -4  -6  218.68   12.31
   3  -4  -6  210.65   12.69
  -3  -4   6  205.02   12.51
   3   4  -6  211.96   12.97
  -3   4   6  214.46   10.35
  -3   4   6  189.80   12.93
  -3   4   6  217.21   12.30
  -2  -4   6   11.06    2.45
   2  -4  -6    7.66    1.76
  -2  -4   6    7.02    1.83
  -2  -4   6    7.53    1.80
   2  -4  -6    9.33    1.70
   2  -4  -6   11.50    3.10
   2  -4  -6    9.21    2.17
  -2   4   6   10.66    2.05
   2   4  -6   12.34    2.61
  -2   4   6    8.38    1.55
   2   4  -6   11.42    1.80
  -2   4   6   10.18    2.22
  -2   4   6    6.79    1.88
   1  -4  -6  135.26   10.72
  -1  -4   6  110.91    6.19
  -1  -4   6  129.49    8.27
  -1  -4   6  146.97    8.43
  -1  -4   6  129.64    8.84
   1  -4  -6  136.87    8.74
   1  -4  -6  132.72    8.36
  -1   4   6  134.64    8.36
  -1   4   6  133.52    8.02
   1   4  -6  141.28   11.64
  -1   4   6  134.34    8.71
   1   4  -6  138.11    8.54
   1   4  -6  115.77    7.84
   0  -4  -6    5.29    3.50
   0  -4   6    1.96    1.81
   0  -4   6    7.45    3.00
   0  -4   6    2.01    1.19
   0  -4  -6    7.48    2.53
   0  -4   6    2.73    1.32
   0  -4   6    1.25    2.16
   0  -4  -6    2.68    1.64
   0   4  -6   -1.76    3.44
   0   4   6    4.11    1.97
   0   4   6   -0.21    1.69
   0   4   6    2.02    1.28
   0   4  -6    4.15    1.72
   0   4   6    6.46    2.97
   0   4  -6   -0.23    1.42
   1  -4   6    6.28    1.23
   1  -4   6    5.93    1.87
   1  -4   6    5.16    1.17
   1  -4   6    8.38    2.14
   1  -4   6   12.49    2.19
   1  -4   6    5.69    2.67
  -1  -4  -6    3.35    2.13
  -1  -4  -6    5.69    1.72
   1   4   6    9.59    1.44
  -1   4  -6    4.32    3.52
   1   4   6    8.35    3.11
  -1   4  -6    9.29    1.78
   1   4   6    6.93    1.54
   1   4   6    6.99    2.24
   2  -4   6    7.18    2.02
   2  -4   6    9.35    2.90
   2  -4   6    4.50    1.01
   2  -4   6    6.52    1.14
  -2  -4  -6    4.98    1.50
  -2  -4  -6    0.39    1.70
   2  -4   6    5.78    1.49
   2   4   6    5.97    1.38
   2   4   6    6.48    3.38
  -2   4  -6    8.27    1.73
   2   4   6   10.04    2.95
  -3  -4  -6  210.82    9.73
   3  -4   6  205.70   16.19
  -3  -4  -6  197.06   12.61
   3  -4   6  201.86   12.61
  -3  -4  -6  192.04   12.57
  -3   4  -6  221.78    9.88
   3   4   6  196.63   12.23
   3   4   6  221.84    9.82
   3   4   6  213.59   13.10
  -4  -4  -6    5.65    1.91
  -4  -4  -6    7.18    1.88
   4  -4   6    7.79    4.92
   4  -4   6    8.21    2.70
  -4  -4  -6    2.84    3.24
   4   4   6    7.70    2.29
   4   4   6    7.99    3.41
  -4   4  -6    8.24    1.83
  -5  -4  -6  118.16    6.49
  -5  -4  -6   99.47   10.46
   5  -4   6  112.00    8.48
   5   4   6  123.53    9.14
  -5   4  -6  126.98    6.56
   6  -4   6   13.52    3.49
  -6  -4  -6    9.56    3.07
  -6   4  -6   11.79    2.74
   6   4   6   10.58    4.21
  -7  -4  -6   14.52    3.66
   7  -4   6   17.11    4.32
  -7   4  -6   14.73    3.21
   7   4   6   20.94    6.26
   7  -5  -6   25.28    7.22
  -7  -5   6   34.75    5.49
  -7  -5   6   50.68    6.01
  -7   5   6   37.92    5.12
  -7   5   6   41.73    5.22
   6  -5  -6   33.13    6.04
  -6  -5   6   46.13    5.14
  -6   5   6   43.06    6.69
  -6   5   6   39.47    5.78
  -6   5   6   42.12    4.57
  -5  -5   6   32.62    4.76
   5  -5  -6   19.54    4.67
   5  -5  -6   23.97    4.17
  -5   5   6   30.33    3.97
   5   5  -6   22.63    5.49
  -5   5   6   31.87    4.92
  -5   5   6   24.54    3.11
  -4  -5   6   25.18    4.19
   4  -5  -6   17.26    3.87
   4  -5  -6   23.52    3.75
   4   5  -6   19.39    4.06
  -4   5   6   23.24    3.71
  -4   5   6   24.11    3.74
   3  -5  -6   -1.01    2.30
  -3  -5   6    0.66    1.96
   3  -5  -6    6.33    3.86
   3  -5  -6    3.84    1.93
  -3   5   6    0.39    1.90
   3   5  -6    2.60    2.80
  -3   5   6    3.21    2.07
  -2  -5   6   17.11    3.00
   2  -5  -6    9.27    2.20
   2  -5  -6   12.82    2.06
   2  -5  -6   17.28    4.50
  -2  -5   6   10.21    2.27
   2  -5  -6   11.41    2.27
   2   5  -6   12.12    2.21
  -2   5   6   11.00    2.14
  -2   5   6   15.99    3.31
   2   5  -6    8.02    2.82
  -2   5   6   15.25    2.17
  -2   5   6   12.77    2.08
   1  -5  -6   90.90    6.49
  -1  -5   6   87.12    5.99
   1  -5  -6  100.90    8.52
  -1  -5   6   87.05    6.52
   1  -5  -6   96.91    6.16
  -1  -5   6   78.25    4.40
  -1  -5   6  100.92    6.16
  -1   5   6   90.52    6.51
   1   5  -6   95.63    6.18
  -1   5   6   90.60    6.01
   1   5  -6   96.65    9.10
  -1   5   6   92.50    5.78
  -1   5   6   89.60    5.34
   1   5  -6   82.78    5.66
   0  -5  -6  129.20    8.52
   0  -5   6  116.97    8.49
   0  -5  -6  132.70   11.12
   0  -5   6  120.08    6.34
   0  -5   6  133.38    8.45
   0  -5   6  143.38    8.17
   0  -5   6  122.26    6.42
   0  -5  -6  120.16    8.51
   0   5   6  113.29   10.20
   0   5   6  133.46    8.64
   0   5  -6  131.74    8.17
   0   5   6  134.84    8.29
   0   5  -6  130.71   11.29
   0   5   6  142.22    7.99
   0   5  -6  144.78    8.14
  -1  -5  -6  198.62   13.25
   1  -5   6  201.75   12.79
   1  -5   6  225.20   13.05
   1  -5   6  210.06   10.10
   1  -5   6  220.32   10.35
   1  -5   6  224.27   16.46
  -1   5  -6  236.15   13.00
   1   5   6  199.88    9.95
   1   5   6  209.79   16.30
  -1   5  -6  232.71   17.01
   1   5   6  220.58   13.56
  -2  -5  -6  109.65    7.59
   2  -5   6  123.18    7.57
   2  -5   6  113.57    9.72
   2  -5   6  116.12    7.55
   2  -5   6  119.72    5.87
  -2  -5  -6  115.24    7.63
   2  -5   6  107.50    7.55
   2   5   6  113.79    9.88
  -2   5  -6  122.83    6.00
   2   5   6  108.90    8.37
   2   5   6  116.91    5.63
   2   5   6  117.01    7.35
  -3  -5  -6   27.07    3.60
  -3  -5  -6   34.40    4.43
   3  -5   6   37.69    3.87
   3  -5   6   40.42    6.18
  -3  -5  -6   26.95    2.61
   3  -5   6   35.62    3.75
   3   5   6   35.64    7.21
   3   5   6   31.75    2.83
  -3   5  -6   30.12    3.00
   3   5   6   29.31    5.05
   3   5   6   24.07    3.27
   4  -5   6    3.30    2.32
  -4  -5  -6   -0.15    1.80
  -4  -5  -6    0.06    2.17
   4  -5   6   -1.01    2.36
   4   5   6   -0.72    2.40
  -4   5  -6   -1.49    1.91
   4   5   6    3.30    3.51
  -5  -5  -6    3.94    2.38
   5  -5   6    7.72    3.16
  -5   5  -6    6.01    2.28
   5   5   6    4.19    4.09
  -6  -5  -6   17.42    3.26
   6  -5   6   23.51    4.44
   6   5   6   15.56    5.20
  -6   5  -6   21.43    2.93
  -7  -5  -6   26.34    4.27
   7  -5   6   15.21    4.46
  -7   5  -6   27.42    3.57
   7   5   6   20.50    6.71
  -7  -6   6   -1.35    4.34
  -7  -6   6    1.54    3.93
   7  -6  -6   -4.15    6.43
  -7   6   6    8.10    4.11
  -7   6   6   -8.55    4.63
   6  -6  -6    0.43    5.11
  -6  -6   6   10.12    3.16
  -6   6   6   -0.89    3.33
  -6   6   6    9.59    3.88
   5  -6  -6    6.47    4.14
  -5  -6   6    5.80    2.88
   5  -6  -6   11.41    4.00
  -5   6   6    2.20    3.20
   5   6  -6    4.11    5.45
  -5   6   6    3.52    3.08
  -5   6   6    7.39    3.37
  -4  -6   6   93.77    6.94
   4  -6  -6   95.06    6.76
   4  -6  -6   97.01    8.36
  -4   6   6  100.79    5.86
  -4   6   6  106.37    6.77
  -4   6   6   99.46    6.20
   4   6  -6   80.23    8.06
   3  -6  -6   32.75    4.67
  -3  -6   6   31.29    3.97
   3  -6  -6   40.25    3.55
  -3   6   6   38.33    3.51
   3   6  -6   29.07    4.89
  -3   6   6   43.72    3.83
   2  -6  -6  360.98   21.07
  -2  -6   6  335.61   21.64
   2  -6  -6  355.24   21.75
  -2  -6   6  356.55   20.68
   2  -6  -6  366.62   27.01
  -2   6   6  360.30   17.05
   2   6  -6  385.61   27.58
   2   6  -6  345.75   21.01
  -2   6   6  349.84   21.22
   1  -6  -6   10.70    2.20
   1  -6  -6    9.33    2.01
  -1  -6   6    9.18    1.56
  -1  -6   6   12.31    2.47
  -1  -6   6   10.41    2.12
  -1  -6   6    6.08    1.90
   1  -6  -6   12.68    3.84
  -1   6   6    7.68    2.53
   1   6  -6    9.29    4.46
   1   6  -6   12.12    2.16
  -1   6   6   11.71    1.94
   1   6  -6    9.88    1.98
  -1   6   6   14.36    2.22
  -1   6   6   10.08    2.06
   0  -6   6   59.72    4.97
   0  -6   6   48.37    3.46
   0  -6  -6   54.68    4.75
   0  -6  -6   50.90    4.86
   0  -6   6   51.38    3.26
   0  -6   6   50.93    4.25
   0  -6   6   37.66    6.81
   0   6   6   45.17    4.19
   0   6   6   57.69    4.15
   0   6  -6   66.61    7.59
   0   6   6   62.87    5.15
   0   6  -6   65.53    4.27
   0   6   6   61.20    5.98
   1  -6   6    5.81    1.46
   1  -6   6   10.01    3.48
   1  -6   6    7.40    1.96
  -1  -6  -6    3.82    2.07
   1  -6   6    4.79    1.31
  -1  -6  -6    1.38    2.57
   1  -6   6    5.63    2.28
  -1   6  -6   -2.22    4.05
   1   6   6    5.08    1.25
   1   6   6    4.30    3.02
   1   6   6    5.04    3.12
  -2  -6  -6   61.72    5.71
   2  -6   6   59.51    7.01
  -2  -6  -6   50.66    4.75
   2  -6   6   64.21    4.94
   2  -6   6   54.78    4.67
   2  -6   6   63.51    4.97
   2  -6   6   60.10    3.52
  -2   6  -6   62.25    3.86
   2   6   6   54.66    6.08
   2   6   6   64.34    4.93
   2   6   6   56.91    3.25
   2   6   6   55.28    7.13
   3  -6   6   23.67    3.89
  -3  -6  -6   14.86    3.57
   3  -6   6   24.70    6.49
  -3  -6  -6   15.97    2.60
   3  -6   6   24.44    3.70
  -3   6  -6   26.14    2.96
   3   6   6   21.06    2.58
   3   6   6   23.09    5.80
   3   6   6   21.63    4.19
  -4  -6  -6  110.62    5.93
   4  -6   6  118.73    8.07
   4  -6   6  115.55    8.05
  -4  -6  -6  107.23    7.97
  -4   6  -6  111.59    6.19
   4   6   6  106.94   13.26
   4   6   6  105.48    8.99
   5  -6   6   11.27    3.17
  -5  -6  -6   11.81    2.45
  -5  -6  -6   15.58    3.13
   5  -6   6   12.99    3.43
   5   6   6   11.66    4.71
  -5   6  -6   20.83    2.93
  -6  -6  -6   55.68    5.56
   6  -6   6   52.49    6.61
   6   6   6   46.02    8.30
  -6   6  -6   61.14    4.77
  -7  -6  -6    0.35    4.11
   7  -6   6    6.82    4.57
   7   6   6    1.60    6.78
  -7   6  -6    1.06    3.14
  -7  -7   6   51.44    7.27
   7  -7  -6   56.05   11.61
  -7  -7   6   57.18    6.42
  -7   7   6   42.65    6.46
  -7   7   6   55.64    7.13
  -6  -7   6    1.32    3.26
   6  -7  -6   -3.05    5.55
  -6   7   6    0.88    3.79
  -6   7   6    6.98    3.54
  -5  -7   6   78.72    6.95
   5  -7  -6   73.87    8.55
  -5   7   6   81.67    5.73
  -5   7   6   80.34    6.36
   4  -7  -6    2.17    2.49
  -4  -7   6    0.77    2.63
   4  -7  -6    3.68    3.45
   4   7  -6    3.06    3.98
  -4   7   6    0.57    3.04
  -4   7   6    2.33    2.27
  -4   7   6    5.06    2.41
   3  -7  -6    3.67    2.91
  -3  -7   6    3.89    2.66
   3  -7  -6   -1.17    2.13
  -3   7   6   -0.11    2.11
   3   7  -6    2.24    8.23
  -3   7   6   -0.09    2.02
   3   7  -6   -4.13    3.43
  -3   7   6    1.04    1.81
   2  -7  -6    8.49    4.69
  -2  -7   6    5.41    2.37
   2  -7  -6    1.02    2.43
  -2   7   6    6.22    2.83
   2   7  -6    3.32    2.00
  -2   7   6    4.49    1.41
  -2   7   6    0.74    2.01
   2   7  -6    5.85    6.19
  -1  -7   6  119.69    7.39
   1  -7  -6  132.37    8.46
  -1  -7   6  128.39    7.67
   1  -7  -6  112.08    7.94
   1  -7  -6  121.64   11.20
  -1  -7   6  105.63    7.99
   1   7  -6  114.74    7.72
  -1   7   6  121.88    8.19
   1   7  -6  121.69   11.67
   1   7  -6  126.44    7.35
  -1   7   6  113.06    7.70
  -1   7   6  129.03    6.80
   0  -7   6    4.50    1.90
   0  -7   6    8.72    1.72
   0  -7  -6    8.50    2.28
   0  -7  -6    2.97    2.94
   0  -7  -6   19.91    5.98
   0  -7   6    8.90    2.71
   0  -7   6   -0.87    3.80
   0  -7   6    1.76    1.74
   0   7   6    8.61    3.49
   0   7   6    6.06    3.20
   0   7  -6    8.59    4.62
   0   7  -6    1.23    2.79
   0   7   6    6.54    1.53
   0   7   6    5.66    2.15
   1  -7   6  306.57   24.05
   1  -7   6  324.26   18.88
   1  -7   6  313.12   18.59
   1  -7   6  347.47   15.28
  -1  -7  -6  320.08   19.52
   1   7   6  323.24   18.41
   1   7   6  294.60   14.39
   1   7   6  310.45   19.29
   1   7   6  314.91   23.95
  -1   7  -6  343.23   24.98
  -2  -7  -6    0.20    2.32
  -2  -7  -6   -0.77    3.37
   2  -7   6   11.76    4.48
   2  -7   6    0.52    1.88
   2  -7   6    1.95    2.47
   2  -7   6    4.74    2.36
   2  -7   6    2.82    2.33
   2   7   6    1.21    1.14
   2   7   6    1.98    4.10
   2   7   6   -0.06    2.42
  -2   7  -6    1.97    1.94
   2   7   6    4.14    4.42
  -3  -7  -6   73.34    7.24
   3  -7   6   79.61    6.12
   3  -7   6   80.47    6.30
  -3  -7  -6   61.61    5.79
   3  -7   6   66.39    6.06
   3   7   6   82.11    9.80
  -3   7  -6   73.16    4.67
   3   7   6   67.75    7.42
   4  -7   6    0.78    2.73
  -4  -7  -6    0.77    2.21
  -4  -7  -6   -1.60    2.59
   4  -7   6   -2.75    2.82
   4   7   6    6.32    6.41
  -4   7  -6    2.10    2.17
   4   7   6   -2.09    4.39
   5  -7   6    8.66    3.46
   5  -7   6   13.14    3.71
  -5  -7  -6   10.86    2.67
  -5  -7  -6   15.71    3.60
   5   7   6    4.70    4.86
   5   7   6    6.51    8.66
  -5   7  -6   12.48    2.71
  -6  -7  -6    4.76    3.33
   6  -7   6    1.51    4.13
   6   7   6   -4.00    5.56
  -6   7  -6    3.47    2.48
   7  -7   6   48.88    8.21
  -7   7  -6   55.16    5.26
   7   7   6   37.80    8.57
   7  -8  -6   -5.25    7.56
  -7  -8   6   -3.53    4.95
  -7  -8   6   -4.26    4.27
  -7   8   6   -3.36    5.34
  -7   8   6    1.96    4.92
   6  -8  -6    1.46    5.74
  -6  -8   6    2.18    3.45
  -6   8   6    0.36    3.75
  -6   8   6    5.95    4.13
   5  -8  -6   11.39    4.25
  -5  -8   6   17.41    3.92
  -5   8   6   10.67    3.63
  -5   8   6   12.65    3.59
  -4  -8   6   65.08    5.80
   4  -8  -6   57.23    7.01
   4  -8  -6   67.37    5.10
   4   8  -6   51.51   14.11
  -4   8   6   58.84    4.99
  -4   8   6   65.61    4.84
   3  -8  -6   98.24    7.87
  -3  -8   6   97.18    7.21
  -3   8   6  100.37    6.27
  -3   8   6  102.56    5.75
   3   8  -6  108.12   12.69
   2  -8  -6  156.21   10.32
  -2  -8   6  141.22    9.46
  -2   8   6  152.50    7.46
   2   8  -6  152.01   14.77
  -2   8   6  147.98    7.99
  -1  -8   6    8.60    2.76
   1  -8  -6   19.33    4.00
  -1  -8   6   12.07    2.62
   1  -8  -6   14.25    3.57
   1  -8  -6   27.95    5.92
  -1   8   6   13.86    2.42
   1   8  -6    7.37    2.99
  -1   8   6   16.35    3.27
   1   8  -6   18.29    5.87
   0  -8   6   10.92    2.43
   0  -8  -6   22.18    7.56
   0  -8   6   13.75    3.07
   0  -8  -6    8.59    4.89
   0  -8   6   13.05    1.94
   0  -8  -6   12.45    2.75
   0  -8   6    9.89    2.47
   0   8   6   12.13    2.45
   0   8  -6   10.93    5.43
   0   8   6    9.29    2.38
   0   8  -6   13.73    1.91
   0   8  -6    9.08    3.80
   0   8   6   11.81    3.60
   0   8   6   13.65    3.93
  -1  -8  -6   -0.22    2.38
   1  -8   6    1.56    2.40
   1  -8   6    0.76    2.28
   1  -8   6    5.29    4.44
   1  -8   6   -0.69    2.34
  -1  -8  -6   -9.14    4.93
   1  -8   6    0.81    2.22
  -1   8  -6   -7.00    5.63
  -1   8  -6    3.45    2.05
   1   8   6    2.13    2.38
   1   8   6   -2.12    4.20
   1   8   6   -1.43    3.71
  -2  -8  -6   18.71    4.75
  -2  -8  -6   17.81    3.04
   2  -8   6   27.50    4.31
   2  -8   6   22.96    4.47
   2  -8   6   23.49    3.75
   2   8   6   20.08    5.51
   2   8   6   29.50    4.33
   2   8   6   18.65    4.75
   3  -8   6   32.38    5.60
   3  -8   6   39.83    4.92
   3  -8   6   33.96    5.14
  -3  -8  -6   35.45    5.16
   3   8   6   31.47    5.79
   3   8   6   38.66    8.35
  -3   8  -6   44.37    3.79
   4  -8   6   59.38    6.89
   4  -8   6   79.38    6.58
   4  -8   6   62.16    6.21
  -4  -8  -6   65.50    6.63
   4   8   6   49.17    7.79
  -4   8  -6   73.61    4.80
   4   8   6   66.04   11.74
  -5  -8  -6   37.90    6.10
   5  -8   6   31.21    6.20
   5  -8   6   32.47    5.81
  -5  -8  -6   29.11    4.07
  -5   8  -6   37.12    4.10
   5   8   6   27.07    6.66
   5   8   6   37.27   10.06
   6  -8   6   32.86    7.01
   6   8   6   13.77   12.12
  -6   8  -6   30.92    4.67
   6   8   6   28.26    7.49
   6  -9  -6   45.32    8.89
  -6  -9   6   48.87    6.31
  -6   9   6   42.17    6.24
  -6   9   6   45.88    6.12
   5  -9  -6    7.61    4.81
  -5  -9   6   10.61    3.98
  -5   9   6   11.24    3.83
   5   9  -6    4.71    9.11
  -5   9   6    9.85    3.64
  -4  -9   6   18.49    3.96
   4  -9  -6   27.55    5.99
  -4   9   6   21.75    3.11
  -4   9   6   25.23    3.98
   4   9  -6   15.89    9.70
   3  -9  -6   -0.22    2.74
  -3  -9   6   -2.26    2.65
   3   9  -6    6.24    8.26
  -3   9   6   -0.58    2.50
  -3   9   6   -0.93    2.25
   2  -9  -6   21.42    4.54
  -2  -9   6   23.81    4.47
   2   9  -6   32.60    8.03
  -2   9   6   25.21    3.04
  -2   9   6   19.57    2.88
  -1  -9   6   21.18    3.77
  -1  -9   6   11.20    3.36
   1  -9  -6   20.44    3.92
  -1   9   6   16.90    3.67
  -1   9   6   20.17    2.31
  -1   9   6   14.59    3.00
   1   9  -6   20.21    2.54
   1   9  -6   12.44    6.53
   0  -9   6   79.08    5.05
   0  -9  -6   79.12    6.57
   0  -9   6   67.40    5.43
   0  -9  -6   83.32   13.56
   0  -9  -6   67.89    8.55
   0  -9   6   79.46    6.02
   0  -9   6   76.81    5.79
   0   9   6   74.09    8.50
   0   9   6   67.13    5.39
   0   9  -6   79.86   10.28
   0   9   6   79.12    5.32
   0   9  -6   78.80    4.66
   0   9   6   74.56    6.39
   0   9   6   65.66    5.06
   0   9  -6   66.58    7.65
   1  -9   6   39.84    4.16
   1  -9   6   46.07    4.29
   1  -9   6   38.03    4.27
  -1  -9  -6   34.54    5.11
   1   9   6   36.10    7.78
  -1   9  -6   36.75    7.85
  -1   9  -6   43.23    3.68
   1   9   6   34.97    4.48
   1   9   6   26.84    5.64
  -2  -9  -6  128.35   11.06
   2  -9   6  138.86    9.33
   2  -9   6  149.18    9.44
   2  -9   6  164.10   10.43
  -2  -9  -6  134.64   10.06
   2   9   6  137.82    9.87
   2   9   6  145.35   13.09
   2   9   6  138.71   10.70
  -2   9  -6  162.12    8.01
  -3  -9  -6   14.39    3.61
   3  -9   6   15.26    4.24
   3  -9   6   19.67    3.30
   3  -9   6   18.17    3.45
  -3   9  -6   17.40    2.79
   3   9   6   12.91    6.51
   3   9   6   15.82    5.34
   4  -9   6    2.74    3.73
   4  -9   6    3.39    4.05
   4  -9   6   -0.01    4.12
  -4  -9  -6    0.30    3.55
   4   9   6    1.70    5.98
   4   9   6    5.42    7.39
  -4   9  -6    0.17    2.61
   5  -9   6    2.62    4.19
  -5  -9  -6   -3.33    4.03
   5  -9   6   -1.57    4.50
   5   9   6    8.12    9.09
   5   9   6   -5.86    6.67
  -5   9  -6    1.84    2.93
   6  -9   6   35.32    6.74
  -6   9  -6   28.16    4.13
   6   9   6   17.74    8.48
   6   9   6   31.57   11.71
  -6 -10   6    1.15    4.33
   6 -10  -6   -2.59    5.69
  -6  10   6   -0.90    4.76
  -6  10   6    0.28    4.15
   6  10  -6  -13.30   10.77
  -5 -10   6   23.55    4.36
   5 -10  -6   21.03    5.54
  -5  10   6   17.64    3.64
   5  10  -6   28.16   10.27
  -5  10   6   26.15    4.03
  -4 -10   6   -2.62    3.23
   4 -10  -6    4.32    4.04
  -4  10   6    0.48    2.83
  -4  10   6   -1.28    3.30
   4  10  -6    1.93    8.32
   3 -10  -6  141.52   10.73
  -3 -10   6  146.35    9.94
  -3  10   6  154.40    7.81
   3  10  -6  149.55   16.37
  -3  10   6  145.72    8.16
  -2 -10   6    3.87    2.74
   2 -10  -6    0.53    2.38
  -2  10   6    2.43    2.93
  -2  10   6    1.97    2.19
   2  10  -6    6.01    7.65
  -1 -10   6   43.90    5.31
  -1 -10   6   48.39    4.99
   1 -10  -6   50.86    5.30
  -1  10   6   51.72    6.00
  -1  10   6   47.48    3.12
   1  10  -6   57.39    9.86
  -1  10   6   48.48    4.57
   1  10  -6   44.84    3.56
   0 -10   6    0.24    3.40
   0 -10  -6    0.52    6.69
   0 -10   6    3.87    2.53
   0 -10  -6   -0.31    2.93
   0 -10   6   -0.40    2.69
   0  10   6   -0.44    2.71
   0  10   6    3.63    2.03
   0  10  -6    2.90    2.31
   0  10   6    0.30    2.11
   0  10  -6   -6.02    6.56
   0  10   6   -0.66    4.68
   0  10   6    2.16    3.90
   0  10  -6   -0.19    4.90
   1 -10   6    8.21    3.40
  -1 -10  -6    1.05    6.10
   1 -10   6    5.47    3.97
  -1 -10  -6    3.64    3.11
   1 -10   6    7.06    2.97
   1  10   6   11.36    3.26
   1  10   6   13.92    4.71
  -1  10  -6   12.99    2.66
   1  10   6    9.81    5.42
  -1  10  -6    1.53    7.37
  -2 -10  -6    1.67    5.25
   2 -10   6    6.34    3.04
  -2 -10  -6    2.84    3.14
   2 -10   6    6.07    3.16
   2 -10   6    8.57    3.84
   2  10   6    8.11    5.81
  -2  10  -6    7.95    2.69
   2  10   6    5.99    4.01
   2  10   6    1.84    5.04
  -2  10  -6   -4.27    7.63
   3 -10   6  102.73    7.23
   3 -10   6   91.74    7.51
  -3 -10  -6   91.76    8.31
   3 -10   6   98.93    8.90
   3  10   6   93.56   12.62
  -3  10  -6   87.77    6.35
   3  10   6   79.06    9.84
  -3  10  -6   98.50    6.05
   4 -10   6   -1.32    4.44
  -4 -10  -6    1.86    3.72
   4 -10   6   -3.98    3.58
   4 -10   6   -4.85    3.84
   4  10   6   -1.36    6.78
   4  10   6    7.27    8.14
  -4  10  -6    3.56    3.01
   5 -10   6   81.99    9.34
   5 -10   6   87.67    8.52
  -5 -10  -6   75.17    9.32
   5  10   6   89.03   14.66
   5  10   6   58.26   11.33
  -5  10  -6   87.52    6.30
   6 -10   6   -2.19    5.71
  -6  10  -6   -1.92    3.94
   6  10   6   11.10   12.74
  -6 -11   6   43.00    7.95
   6 -11  -6   30.94    8.30
  -6  11   6   57.93    7.46
   5 -11  -6    3.49    5.37
  -5 -11   6    4.18    4.20
  -5  11   6    4.94    4.13
   5  11  -6   -3.89    9.20
  -5  11   6    2.09    4.00
  -4 -11   6   21.11    4.02
   4 -11  -6   18.71    4.69
  -4  11   6   19.67    3.81
  -4  11   6   15.34    3.19
   4  11  -6   31.26   10.67
  -3 -11   6    0.07    3.71
   3 -11  -6   -2.22    2.87
   3  11  -6   14.23    8.10
  -3  11   6   -2.71    2.60
  -3  11   6   -4.50    2.59
   2 -11  -6   18.08    3.58
  -2 -11   6   27.95    5.08
  -2  11   6   20.78    2.55
  -2  11   6   24.46    3.18
   2  11  -6   18.04    2.81
   2  11  -6   20.97    8.41
   1 -11  -6   11.74    3.60
  -1 -11   6   15.39    3.33
  -1 -11   6   11.72    4.40
  -1  11   6   13.90    3.11
   1  11  -6   18.08    7.55
   1  11  -6   14.09    2.36
  -1  11   6   13.31    1.80
   0 -11  -6   83.09    7.31
   0 -11   6   99.46    7.02
   0  11   6   75.02   10.35
   0  11   6   83.96    7.87
   0  11   6   88.33    6.27
   0  11  -6   94.94    5.63
   0  11  -6   98.27   12.46
  -1 -11  -6   11.02    7.09
   1 -11   6   20.76    4.39
   1 -11   6   27.68    4.72
  -1 -11  -6   20.60    4.03
   1 -11   6   24.94    4.55
  -1  11  -6   30.08    8.70
  -1  11  -6   28.74    3.38
   1  11   6   35.91    7.44
   1  11   6   29.37    5.90
   1  11   6   26.04    4.07
   2 -11   6   73.14    6.20
   2 -11   6   68.40    7.57
   2 -11   6   65.47    6.24
  -2  11  -6   78.07    5.63
  -2  11  -6   67.46   12.70
   2  11   6   74.93   11.09
   2  11   6   56.51    8.17
   3 -11   6    0.97    4.86
   3 -11   6    5.07    3.62
  -3 -11  -6   -0.67    4.17
   3 -11   6   -0.21    3.42
  -3  11  -6    3.44    3.14
   3  11   6    5.66    7.56
   3  11   6    1.81    6.11
   4 -11   6    2.52    5.78
   4 -11   6    1.44    4.23
   4 -11   6    5.54    4.53
  -4 -11  -6   -0.33    4.78
   4  11   6    1.39    7.41
   4  11   6    9.29    9.21
  -4  11  -6    1.17    3.43
  -5 -11  -6    4.55    5.73
   5 -11   6    2.88    5.09
  -5  11  -6    0.82    3.80
   5  11   6   18.90   11.34
   5 -12  -6    1.55    5.14
  -5 -12   6    5.14    4.67
  -5  12   6    7.78    5.02
   5  12  -6   21.55   12.12
  -4 -12   6   35.30    6.20
   4 -12  -6   31.00    6.58
  -4  12   6   36.46    5.44
  -4  12   6   39.61    5.47
  -3 -12   6   43.23    6.36
   3 -12  -6   36.34    6.24
  -3  12   6   42.58    4.44
   3  12  -6   34.91   10.54
  -3  12   6   35.61    4.52
   2 -12  -6   62.40    6.74
  -2 -12   6   61.88    6.82
   2  12  -6   83.19   11.51
  -2  12   6   63.96    4.48
  -2  12   6   69.00    5.27
   1 -12  -6   20.26    3.98
  -1 -12   6   24.15    4.87
   1  12  -6   21.13    2.89
   1  12  -6   17.66    8.64
  -1  12   6   19.43    3.80
   0 -12  -6    5.72    3.74
   0 -12   6    9.79    3.04
   0  12  -6   16.65    3.12
   0  12  -6   18.33    8.88
   0  12   6   14.68    4.74
   0  12   6   -0.71    3.35
   0  12   6   11.16    6.16
  -1 -12  -6   -3.41    3.74
   1 -12   6    4.39    2.84
   1 -12   6    4.75    4.55
   1 -12   6   -1.86    3.39
   1  12   6   -3.74    4.33
  -1  12  -6   -0.69    2.84
   1  12   6    1.81    6.66
   1  12   6    8.38    5.15
   2 -12   6   19.32    5.59
   2 -12   6   22.46    4.29
   2 -12   6   30.24    5.01
  -2 -12  -6   17.15    4.41
   2  12   6   31.50    7.95
  -2  12  -6   26.24    3.71
  -2  12  -6   24.54    9.89
   2  12   6   22.12    5.97
   3 -12   6   41.17    5.68
  -3 -12  -6   36.43    6.65
   3 -12   6   27.15    5.93
   3 -12   6   28.33    6.37
  -3  12  -6   31.89    4.84
   3  12   6   22.02    6.85
   3  12   6   30.68    8.91
  -4 -12  -6   34.98    5.81
   4 -12   6   35.39    7.42
   4 -12   6   24.61    6.91
  -4  12  -6   40.39    5.51
   4  12   6   55.96   13.68
   5 -12   6   23.52    6.15
  -5 -12  -6   21.45    6.36
  -5  12  -6   21.95    4.89
   5  12   6   34.60   13.02
  -4 -13   6    1.95    5.15
   4 -13  -6    0.80    5.10
  -4  13   6    0.79    3.94
   4  13  -6   20.71   10.68
  -3 -13   6    2.21    4.38
   3 -13  -6   -4.62    3.93
   3  13  -6    9.51    9.12
  -3  13   6    0.23    3.64
   2 -13  -6    2.45    3.56
  -2 -13   6    1.31    4.01
   2  13  -6    8.62    8.18
  -2  13   6    3.11    3.62
  -1 -13   6   58.98    6.80
   1 -13  -6   56.20    6.78
   1  13  -6   56.25    4.91
  -1  13   6   55.67    6.01
   1  13  -6   65.33   12.41
   0 -13   6    7.99    3.72
   0 -13  -6   -3.98    3.83
   0 -13   6    3.50    5.17
   0  13  -6    5.92    3.09
   0  13   6    7.39    6.68
   0  13  -6   10.96    9.49
   0  13   6    1.95    3.93
   1 -13   6  102.45   10.53
   1 -13   6  116.51    8.26
  -1 -13  -6  105.86    9.62
   1  13   6  117.41   13.24
   1  13   6   97.78    9.39
  -1  13  -6  122.45   15.30
   1  13   6   99.68    8.76
  -1  13  -6  110.65    7.74
   2 -13   6    2.87    3.92
  -2 -13  -6    2.09    4.54
   2 -13   6    2.14    5.33
   2  13   6    4.57    9.25
   2  13   6    1.86    4.94
  -2  13  -6    0.46    3.62
   2  13   6    0.77    6.41
  -3 -13  -6   24.32    5.58
   3 -13   6   30.80    7.29
   3  13   6   37.64   10.01
  -3  13  -6   31.32    4.54
   4 -13   6   -0.40    7.45
  -4 -13  -6   -2.55    6.19
   4 -13   6   -3.05    5.82
   4  13   6   11.88   12.83
   4 -14  -6   17.08    6.09
  -4 -14   6   32.64    6.20
  -3 -14   6    9.01    4.99
   3 -14  -6   -1.35    4.46
   3  14  -6    8.30    9.99
  -3  14   6   -2.57    3.52
  -2 -14   6   79.36    8.02
   2 -14  -6   65.53    7.82
   2  14  -6   82.85   13.06
  -2  14   6   82.14    6.72
   1 -14  -6   -5.07    3.91
  -1 -14   6    1.11    4.45
   1  14  -6   20.16   10.16
  -1  14   6    7.01    3.92
   0 -14  -6    3.13    3.79
   0 -14   6    8.38    4.13
   0 -14   6   13.74    5.24
   0  14  -6   19.53   10.40
   0  14   6   14.15    7.86
   0  14  -6   10.10    3.74
   0  14   6    7.92    4.44
  -1 -14  -6  -10.09    4.48
   1 -14   6    3.85    5.98
   1 -14   6    2.78    4.04
   1  14   6    1.84    8.69
  -1  14  -6    0.61    3.81
  -1  14  -6    3.14   10.20
   1  14   6   -5.15    4.79
   2 -14   6   14.35    7.15
  -2 -14  -6   14.32    5.39
  -2  14  -6   14.60    4.39
   2  14   6   21.43    9.76
   2  14   6   14.96    6.61
   3 -14   6    5.54    8.11
  -3 -14  -6   -3.35    5.51
  -3  14  -6    4.48    4.58
   3  14   6   14.27   10.83
   3  14   6   -9.19    7.19
  -4 -14  -6   14.36    6.88
   4  14   6   29.31   13.02
  -3 -15   6   -7.50    5.39
  -2 -15   6    8.54    5.50
   2  15  -6   29.51   11.89
  -2  15   6    8.80    4.15
   1 -15  -6   10.45    4.13
  -1  15   6   17.37    4.85
   1  15  -6   17.43   10.37
   0 -15   6   27.09    7.11
   0 -15  -6   17.01    5.39
   0  15   6   27.69    9.48
   0  15  -6   34.37   12.10
   0  15   6   27.54    6.28
  -1 -15  -6   19.31    5.77
   1 -15   6   29.17    7.57
  -1  15  -6   46.04   12.32
  -1  15  -6   35.63    5.40
   1  15   6   45.30    6.46
   1  15   6   33.97   10.50
  -2 -15  -6   17.19    6.28
   2 -15   6   25.48    7.82
   2  15   6   21.98   11.67
   2  15   6    7.18    7.34
  -2  15  -6   20.14    5.11
  -3 -15  -6   -1.49    6.58
   3 -15   6   13.67    9.71
  -3  15  -6   10.33    5.45
   3  15   6    6.98   12.39
   3  15   6    0.93    8.15
  -1 -16   6   21.96    8.20
   1  16  -6   50.87   14.33
  -1  16   6   23.75    6.59
   0 -16   6  -13.40    7.87
   0 -16  -6   -0.54    5.38
   0  16   6   22.31    6.94
   0  16   6    2.47   10.56
   0  16  -6   11.10   13.31
  -1 -16  -6    0.58    6.05
   1 -16   6    6.09    8.08
   1  16   6   21.96   11.33
  -1  16  -6   10.14   13.37
   1  16   6   13.89    7.74
   8   0  -7   -1.32    6.18
  -8   0   7    0.96    5.53
  -7   0   7    0.48    3.11
  -7   0   7   -0.33    4.86
  -6   0   7    5.41    3.46
  -5   0   7   91.89    6.77
  -5   0   7   91.95    5.53
   5   0  -7   79.29    8.00
   4   0  -7   -0.94    3.38
  -4   0   7   -1.03    1.76
  -4   0   7   -0.04    2.23
   3   0  -7  559.28   30.73
   3   0  -7  526.83   31.67
  -3   0   7  501.75   31.45
  -3   0   7  525.39   29.97
   3   0  -7  551.49   29.93
  -3   0   7  494.98   24.39
  -2   0   7    0.41    1.56
  -2   0   7    1.23    1.44
  -2   0   7    2.30    2.21
   2   0  -7    0.10    1.11
  -2   0   7    1.19    1.24
   2   0  -7    0.26    1.70
   2   0  -7    2.39    2.25
   1   0  -7   51.82    4.44
  -1   0   7   49.94    5.26
   1   0  -7   37.40    3.35
  -1   0   7   52.04    4.32
  -1   0   7   38.16    4.11
   1   0  -7   53.90    4.98
   0   0   7    0.28    2.29
   0   0   7   -0.05    1.73
   0   0  -7    4.72    2.21
   0   0   7   -1.86    3.35
   0   0  -7   -0.45    2.35
   1   0   7    4.56    1.56
   1   0   7    3.03    1.33
  -1   0  -7    1.05    1.67
   1   0   7    2.10    2.64
  -1   0  -7    4.32    1.65
   2   0   7    0.43    1.01
  -2   0  -7   -0.27    1.20
   2   0   7   -1.09    2.17
   3   0   7  149.19    7.42
  -3   0  -7  169.27    7.64
  -3   0  -7  146.76    9.54
   3   0   7  151.61    9.84
   4   0   7    1.86    2.72
  -4   0  -7   -0.89    1.82
  -5   0  -7  148.37    7.62
   5   0   7  138.68    9.76
  -6   0  -7    0.28    2.78
   6   0   7    0.82    3.01
  -7   0  -7    2.70    3.53
   7   0   7   -0.28    3.71
  -8  -1   7   35.95    6.07
   8  -1  -7   22.62    8.04
  -8   1   7   19.44    6.88
   7  -1  -7   -8.18    5.39
  -7  -1   7   13.30    4.43
  -7  -1   7    5.84    3.25
  -7   1   7    2.29    3.12
   7   1  -7    3.35    5.30
  -7   1   7    7.85    4.42
  -6  -1   7   57.06    5.83
  -6   1   7   55.81    5.43
   6   1  -7   45.30    7.65
  -6   1   7   60.34    6.60
   5  -1  -7    6.77    4.18
  -5  -1   7   10.75    2.99
  -5   1   7   12.76    3.49
   5   1  -7   10.01    3.59
  -5   1   7   11.51    2.54
   4  -1  -7   28.31    6.03
   4  -1  -7   30.25    3.78
  -4  -1   7   27.70    2.75
  -4  -1   7   28.19    3.79
   4   1  -7   31.68    5.18
  -4   1   7   27.76    3.00
  -4   1   7   33.83    4.12
  -3  -1   7   -2.12    1.53
  -3  -1   7    0.02    1.20
   3  -1  -7    0.76    1.74
   3  -1  -7    0.29    1.46
  -3  -1   7    0.71    2.10
   3  -1  -7    1.21    2.68
  -3   1   7    0.76    2.07
  -3   1   7    1.98    1.46
   3   1  -7   -0.06    1.22
   3   1  -7    0.86    1.97
  -3   1   7    0.55    1.37
   3   1  -7    3.40    2.77
   2  -1  -7   85.27    5.82
   2  -1  -7   89.25    6.89
  -2  -1   7   90.72    5.91
  -2  -1   7   83.06    6.04
   2  -1  -7   92.43    5.56
  -2  -1   7   83.91    4.42
  -2  -1   7   82.60    6.10
  -2   1   7   79.57    6.03
  -2   1   7   90.81    4.73
   2   1  -7   88.15    6.87
  -2   1   7   73.88    5.73
   2   1  -7   82.37    5.93
   2   1  -7   90.80    5.43
  -2   1   7   86.60    5.61
  -1  -1   7   40.62    5.19
   1  -1  -7   40.37    3.61
  -1  -1   7   44.56    4.12
   1  -1  -7   47.42    4.76
   1  -1  -7   44.54    4.24
  -1  -1   7   42.64    4.01
   1   1  -7   43.08    4.29
   1   1  -7   47.16    4.94
  -1   1   7   34.83    3.87
   1   1  -7   40.89    3.18
  -1   1   7   43.63    5.15
  -1   1   7   48.20    3.92
   0  -1  -7  295.63   17.72
   0  -1   7  318.75   17.85
   0  -1   7  313.25   17.20
   0  -1   7  274.49   17.60
   0  -1  -7  291.48   17.59
   0   1  -7  295.23   17.48
   0   1   7  289.43   17.01
   0   1   7  297.45   17.76
   0   1  -7  262.42   21.20
   0   1   7  275.47   17.55
   0   1  -7  301.74   17.79
  -1  -1  -7   78.18    5.20
   1  -1   7   62.53    5.29
   1  -1   7   75.28    4.16
  -1  -1  -7   66.93    5.48
   1  -1   7   78.64    6.13
   1  -1   7   80.20    5.16
   1   1   7   71.61    4.99
  -1   1  -7   88.57    5.31
   1   1   7   65.33    4.13
   1   1   7   68.98    6.01
  -1   1  -7   75.87    5.28
   2  -1   7  168.61   13.54
   2  -1   7  178.56    8.63
  -2  -1  -7  184.49   11.18
   2  -1   7  202.01   11.55
   2   1   7  191.38   11.54
  -2   1  -7  188.74   11.14
   2   1   7  184.36    8.68
  -2   1  -7  173.11    8.77
  -3  -1  -7   17.29    2.43
   3  -1   7   15.45    2.81
  -3  -1  -7   20.51    2.41
   3  -1   7   15.88    1.78
  -3   1  -7   14.51    2.19
  -3   1  -7   14.20    1.98
   3   1   7   14.06    2.07
   3   1   7   20.17    3.34
  -4  -1  -7    0.71    2.05
   4  -1   7    3.16    2.67
   4   1   7    3.86    2.45
  -4   1  -7   -0.58    1.82
   5  -1   7    8.13    2.74
  -5  -1  -7   10.03    2.42
  -5   1  -7   13.52    2.37
   5   1   7   11.82    3.12
   6  -1   7   61.37    6.54
  -6  -1  -7   76.52    5.57
   6   1   7   59.68    6.42
  -6   1  -7   64.92    5.13
   7  -1   7   18.97    4.48
  -7  -1  -7   21.60    3.99
   7   1   7   22.29    4.54
  -7   1  -7   22.45    3.92
  -7  -2   7   -5.89    4.13
  -7  -2   7   -1.17    3.35
   7  -2  -7  -11.97    5.36
  -7   2   7    4.10    3.19
  -7   2   7   -2.28    4.99
  -6  -2   7   13.72    3.61
  -6   2   7    9.85    2.47
  -6   2   7   11.81    3.20
  -6   2   7   12.72    4.32
   6   2  -7   12.63    4.48
  -5  -2   7   42.26    4.57
   5  -2  -7   33.36    7.10
  -5   2   7   42.88    4.61
  -5   2   7   38.53    5.18
   5   2  -7   30.00    5.79
   4  -2  -7  108.84    7.91
   4  -2  -7  119.79    9.24
  -4  -2   7  112.66    7.66
  -4   2   7  123.72    7.74
  -4   2   7  114.70    6.28
   4   2  -7  106.96    8.69
   4   2  -7  112.36    9.16
  -3  -2   7   79.22    4.31
   3  -2  -7   92.79    5.90
  -3  -2   7   91.27    6.13
   3  -2  -7   89.93    5.71
   3  -2  -7   89.83    7.13
  -3  -2   7   73.28    6.02
  -3   2   7   87.58    4.85
  -3   2   7   78.87    6.00
   3   2  -7   86.82    6.62
   3   2  -7   82.79    7.17
   3   2  -7   86.72    5.39
  -3   2   7   87.02    5.85
   2  -2  -7  164.05    9.68
   2  -2  -7  150.65    9.37
  -2  -2   7  144.94    7.40
  -2  -2   7  145.29    9.99
  -2  -2   7  155.04    9.53
  -2  -2   7  157.04    9.80
   2  -2  -7  155.19   10.31
  -2   2   7  170.84   10.07
  -2   2   7  151.08    9.41
  -2   2   7  159.74    9.85
   2   2  -7  157.12   10.57
   2   2  -7  168.47    9.88
  -2   2   7  159.76    7.80
   2   2  -7  156.89    9.29
   1  -2  -7   61.50    4.95
  -1  -2   7   43.99    4.29
   1  -2  -7   54.16    4.50
  -1  -2   7   49.80    5.57
   1  -2  -7   42.72    3.96
  -1  -2   7   48.53    4.56
   1   2  -7   49.58    4.59
   1   2  -7   55.16    5.27
  -1   2   7   50.77    4.01
  -1   2   7   60.21    5.31
   1   2  -7   48.56    3.49
  -1   2   7   41.61    4.06
   0  -2  -7    5.27    2.02
   0  -2   7    5.25    3.08
   0  -2  -7   -3.15    2.21
   0  -2   7    2.60    2.35
   0  -2  -7    3.60    2.69
   0  -2   7    3.12    1.97
   0   2  -7    4.83    2.35
   0   2   7    0.99    1.77
   0   2   7    5.17    3.63
   0   2  -7    1.48    2.55
   0   2   7    1.91    1.51
   0   2  -7    0.98    2.03
  -1  -2  -7   12.80    2.19
   1  -2   7   14.67    1.90
   1  -2   7    9.28    2.84
   1  -2   7   13.68    2.86
  -1  -2  -7   11.86    2.57
   1  -2   7   16.57    2.93
   1  -2   7    9.74    2.42
   1   2   7    9.75    3.29
  -1   2  -7   14.01    2.50
   1   2   7   15.01    2.41
   1   2   7   17.38    2.57
   2  -2   7  125.49   10.58
  -2  -2  -7  138.79    8.45
   2  -2   7  137.28    8.82
   2  -2   7  141.50    6.61
  -2  -2  -7  131.36    8.52
  -2   2  -7  138.41    8.56
   2   2   7  142.71    6.72
   2   2   7  138.90    9.27
  -2   2  -7  144.49    6.87
   3  -2   7   53.78    4.91
  -3  -2  -7   57.00    3.55
   3  -2   7   54.74    6.15
   3   2   7   53.43    4.99
   3   2   7   54.27    3.56
  -3   2  -7   57.80    3.68
   4  -2   7  129.72    8.73
  -4  -2  -7  123.90    6.68
  -4   2  -7  126.72    6.62
   4   2   7  123.52    8.98
  -5  -2  -7   51.86    4.11
   5  -2   7   47.74    5.51
   5   2   7   55.19    6.05
  -5   2  -7   48.71    4.11
  -6  -2  -7   34.12    4.39
   6  -2   7   30.69    5.26
   6   2   7   39.78    6.37
  -6   2  -7   28.26    3.67
  -7  -2  -7    3.13    3.59
   7  -2   7    1.03    4.06
   7   2   7    0.63    4.65
  -7   2  -7   -2.60    3.36
  -7  -3   7   71.87    8.00
  -7  -3   7   63.75    5.98
  -7   3   7   68.16    5.60
  -7   3   7   72.51    7.69
  -7   3   7   74.33    8.67
  -6  -3   7    6.13    3.75
   6  -3  -7  -10.47    4.79
  -6   3   7    8.93    3.27
  -6   3   7    3.92    2.57
  -6   3   7    3.91    4.22
   5  -3  -7   46.21    7.23
  -5  -3   7   55.09    5.44
   5   3  -7   42.36    5.96
  -5   3   7   48.52    4.77
  -5   3   7   56.24    5.55
  -4  -3   7    5.50    2.79
   4  -3  -7    3.19    2.68
   4  -3  -7   -1.33    3.30
   4   3  -7    0.47    3.63
  -4   3   7    3.26    2.15
  -4   3   7    6.99    2.61
   4   3  -7    2.94    3.33
   3  -3  -7   24.59    4.70
  -3  -3   7   18.11    3.13
   3  -3  -7   21.50    3.51
  -3   3   7   19.19    2.90
   3   3  -7   12.85    2.89
  -3   3   7   20.71    2.92
   3   3  -7   15.68    3.28
  -2  -3   7   21.90    3.33
   2  -3  -7   18.14    2.96
  -2  -3   7   25.25    3.29
   2  -3  -7   22.40    4.22
   2  -3  -7   21.44    2.85
  -2  -3   7   16.17    3.36
   2   3  -7   19.61    3.90
   2   3  -7   21.56    2.17
  -2   3   7   20.85    2.68
  -2   3   7   21.88    2.49
  -2   3   7   26.21    3.70
   2   3  -7   19.51    4.34
  -2   3   7   19.97    2.48
  -1  -3   7  229.30   14.43
   1  -3  -7  229.43   14.43
   1  -3  -7  233.61   14.05
  -1  -3   7  241.30   13.78
   1  -3  -7  214.54   17.39
  -1  -3   7  234.95   14.33
   1   3  -7  223.05   13.50
   1   3  -7  258.50   17.98
  -1   3   7  250.16   14.41
   1   3  -7  233.10   14.07
  -1   3   7  208.70   13.62
  -1   3   7  232.48   14.20
   0  -3  -7    2.23    3.03
   0  -3   7    5.56    2.35
   0  -3  -7    6.42    2.32
   0  -3  -7    5.55    1.99
   0  -3   7    1.89    3.13
   0  -3   7    2.40    1.93
   0   3  -7    3.80    1.77
   0   3  -7    2.69    1.45
   0   3  -7    0.92    2.77
   0   3   7    0.67    2.99
   0   3   7    3.80    2.01
   0   3   7    4.15    1.54
   1  -3   7  343.69   24.51
  -1  -3  -7  308.60   19.88
  -1  -3  -7  321.13   19.99
   1  -3   7  321.05   19.40
   1  -3   7  338.21   15.44
   1  -3   7  358.28   19.98
   1  -3   7  330.06   15.75
   1  -3   7  348.64   20.07
   1   3   7  335.51   20.13
   1   3   7  315.30   15.37
   1   3   7  325.81   24.26
  -1   3  -7  359.01   19.74
   1   3   7  348.98   20.07
  -2  -3  -7    0.55    1.36
  -2  -3  -7    1.86    1.40
   2  -3   7    1.98    2.24
   2  -3   7    2.36    2.93
   2  -3   7    0.08    1.07
   2  -3   7    1.35    0.99
   2  -3   7    1.63    1.24
   2   3   7   -2.21    2.55
   2   3   7    0.96    1.45
   2   3   7    1.04    2.66
  -2   3  -7    3.16    1.60
  -2   3  -7    4.01    1.60
  -3  -3  -7   21.31    2.69
  -3  -3  -7   20.01    2.65
   3  -3   7   30.75    5.15
   3  -3   7   23.94    3.31
   3   3   7   15.27    2.03
  -3   3  -7   18.84    2.40
   3   3   7   20.81    3.52
  -4  -3  -7   -0.15    1.55
   4  -3   7   -0.37    4.88
  -4  -3  -7   -2.66    2.74
  -4  -3  -7   -0.31    1.88
   4  -3   7    3.71    2.31
   4   3   7    1.08    2.26
  -4   3  -7   -0.59    1.62
   4   3   7   -1.36    3.20
  -5  -3  -7   23.27    3.35
  -5  -3  -7   28.60    3.44
   5  -3   7   27.54    4.22
  -5   3  -7   27.39    3.05
   5   3   7   17.11    4.31
  -6  -3  -7    4.52    2.89
   6  -3   7    4.40    3.46
   6   3   7   -0.76    4.43
  -6   3  -7   10.47    2.68
  -7  -3  -7   69.47    6.76
   7  -3   7   56.15    6.89
   7   3   7   55.37    9.01
  -7   3  -7   65.74    5.69
  -7  -4   7    2.01    4.02
  -7  -4   7    4.54    3.53
  -7   4   7    1.44    5.36
  -7   4   7    0.05    4.41
  -7   4   7    1.13    3.50
  -6  -4   7   27.80    4.73
   6  -4  -7   15.06    5.21
  -6   4   7   24.74    3.90
  -6   4   7   19.94    3.45
  -6   4   7   24.50    4.58
  -5  -4   7   19.96    3.65
   5  -4  -7   17.75    4.48
  -5   4   7   20.06    3.15
  -5   4   7   20.07    3.62
   4  -4  -7   84.64    6.73
   4  -4  -7   91.31    7.65
  -4  -4   7   88.64    6.52
  -4   4   7   91.58    5.69
  -4   4   7   97.02    6.63
   4   4  -7   76.32    7.81
  -3  -4   7   17.49    2.70
   3  -4  -7   21.84    3.45
   3  -4  -7   19.78    3.39
  -3   4   7   19.26    3.18
   3   4  -7   18.85    3.77
  -3   4   7   19.82    2.46
   2  -4  -7   97.64    6.22
   2  -4  -7   90.53    6.83
   2  -4  -7   96.44    8.79
   2  -4  -7   91.57    6.28
  -2  -4   7   92.61    6.28
  -2  -4   7   95.06    6.27
  -2  -4   7   88.53    6.86
  -2   4   7   86.35    5.94
  -2   4   7  100.23    5.23
  -2   4   7  104.22    6.79
   2   4  -7  100.18    7.00
  -2   4   7   87.64    6.20
   2   4  -7   84.61    5.80
  -1  -4   7    7.09    1.00
   1  -4  -7    7.09    1.87
  -1  -4   7    6.16    2.17
   1  -4  -7   12.22    3.57
  -1  -4   7    3.51    2.16
   1  -4  -7    4.91    2.12
  -1  -4   7    9.82    3.11
  -1   4   7    6.47    1.37
   1   4  -7    4.74    2.51
   1   4  -7   13.20    4.20
  -1   4   7    3.63    2.07
  -1   4   7    5.06    2.78
   1   4  -7    3.48    1.41
   0  -4   7    2.86    2.15
   0  -4  -7    4.69    1.93
   0  -4   7    0.64    1.80
   0  -4   7    6.03    2.91
   0  -4  -7    9.55    3.62
   0  -4  -7    1.95    2.01
   0  -4   7    2.27    1.33
   0  -4   7    1.76    1.17
   0   4  -7    1.90    3.50
   0   4  -7    2.44    2.00
   0   4   7    1.55    2.13
   0   4   7    2.57    1.36
   0   4   7    2.34    2.60
   1  -4   7    1.36    2.04
   1  -4   7    1.55    1.79
   1  -4   7    2.87    2.30
  -1  -4  -7    2.37    1.58
   1  -4   7    0.32    1.23
   1  -4   7    7.30    3.19
  -1  -4  -7    3.18    2.00
   1  -4   7    2.64    1.19
  -1   4  -7    1.05    3.21
   1   4   7    1.68    3.08
   1   4   7    1.80    1.65
   1   4   7    1.96    1.63
   1   4   7   -0.66    2.17
  -1   4  -7    3.14    1.71
  -2  -4  -7  188.25   12.14
   2  -4   7  206.15   12.14
  -2  -4  -7  194.87   12.17
   2  -4   7  213.62   12.09
   2  -4   7  191.67   15.34
   2  -4   7  213.11   12.01
   2  -4   7  195.25    9.58
   2  -4   7  197.29   12.22
   2   4   7  177.41   15.11
   2   4   7  210.99    9.38
   2   4   7  173.97   12.51
  -2   4  -7  209.75    9.54
  -3  -4  -7   14.87    2.68
   3  -4   7   17.76    4.29
  -3  -4  -7   14.18    2.05
   3  -4   7   12.31    2.73
   3   4   7   12.92    3.54
   3   4   7   12.47    4.72
  -3   4  -7   12.88    2.12
   3   4   7   10.41    1.97
   4  -4   7  132.88    9.00
  -4  -4  -7  106.42    9.33
  -4  -4  -7  139.96    6.81
   4  -4   7  128.76   12.02
  -4  -4  -7  128.19    8.39
   4   4   7  134.64    9.60
  -4   4  -7  136.18    6.90
   4   4   7  127.32    7.05
  -5  -4  -7    4.57    2.58
  -5  -4  -7    4.06    2.18
   5  -4   7    6.90    2.77
  -5   4  -7    3.68    2.30
   5   4   7    5.06    4.10
   6  -4   7   49.42    6.10
  -6  -4  -7   46.38    5.20
  -6   4  -7   47.47    4.45
   6   4   7   51.34    7.55
   7  -4   7   -5.44    4.13
  -7  -4  -7    0.62    3.78
   7   4   7   -1.61    6.26
  -7   4  -7    3.81    2.81
   7  -5  -7   13.22    7.03
  -7  -5   7   35.45    5.84
  -7   5   7   28.22    4.35
  -7   5   7   39.01    6.79
  -7   5   7   36.37    5.33
   6  -5  -7   34.25    6.01
  -6  -5   7   45.22    5.37
  -6   5   7   43.80    6.44
  -6   5   7   44.27    5.01
  -6   5   7   47.01    6.14
   5  -5  -7   31.57    7.07
  -5  -5   7   49.43    4.91
   5  -5  -7   48.12    6.45
  -5   5   7   47.47    4.59
  -5   5   7   50.50    5.84
  -5   5   7   47.90    5.20
   4  -5  -7   18.07    3.10
  -4  -5   7   17.94    3.76
   4  -5  -7   15.07    3.41
  -4   5   7   15.40    3.03
   4   5  -7    9.75    4.40
  -4   5   7   15.38    2.58
   3  -5  -7    2.34    2.39
   3  -5  -7    3.76    2.89
   3  -5  -7   11.57    5.00
  -3  -5   7    4.86    2.31
   3   5  -7    5.16    3.56
  -3   5   7    4.90    2.07
  -3   5   7    4.64    2.06
   2  -5  -7   46.19    3.59
  -2  -5   7   43.98    4.21
  -2  -5   7   43.48    4.36
   2  -5  -7   43.75    6.57
   2  -5  -7   42.23    4.22
   2  -5  -7   45.06    4.82
  -2  -5   7   36.82    3.77
  -2   5   7   42.23    4.16
   2   5  -7   41.56    3.16
  -2   5   7   39.49    3.40
   2   5  -7   42.06    8.89
  -2   5   7   37.31    3.42
  -2   5   7   43.85    3.58
   2   5  -7   33.60    5.31
  -1  -5   7  116.41    7.82
  -1  -5   7  105.20    5.58
   1  -5  -7  114.48    7.52
   1  -5  -7  108.69   10.33
   1  -5  -7  116.16    8.01
  -1  -5   7  131.59    7.55
  -1  -5   7  112.99    7.89
  -1   5   7  118.34    7.25
   1   5  -7  118.64    7.12
  -1   5   7  115.23    7.55
   1   5  -7  119.15    7.76
   1   5  -7  121.96   10.87
  -1   5   7  111.23    8.06
   0  -5  -7  172.99   13.35
   0  -5  -7  156.90   10.20
   0  -5   7  159.91   10.23
   0  -5   7  157.21    7.83
   0  -5   7  166.23   10.38
   0  -5   7  158.50    9.94
   0  -5  -7  149.16   10.08
   0   5  -7  171.78   13.15
   0   5  -7  173.02   10.04
   0   5   7  155.20   10.54
   0   5  -7  149.97    9.70
   0   5   7  154.49   10.07
   0   5   7  154.35    9.73
   1  -5   7  203.99   11.73
   1  -5   7  199.90    9.56
   1  -5   7  200.27   12.26
  -1  -5  -7  170.47   12.07
   1  -5   7  199.92   15.35
   1  -5   7  194.62   12.02
  -1  -5  -7  197.35   12.15
   1   5   7  197.07   12.52
   1   5   7  189.08    9.17
  -1   5  -7  194.76   15.35
   1   5   7  178.26   14.73
  -1   5  -7  205.11   11.98
  -2  -5  -7  105.02    6.79
  -2  -5  -7   88.42    6.91
   2  -5   7  106.52    6.88
   2  -5   7   78.06    6.77
   2  -5   7   98.58    5.38
   2  -5   7  108.47    9.61
   2  -5   7   95.64    6.58
   2   5   7   90.25    5.05
   2   5   7  109.28    8.82
   2   5   7   94.63    7.90
   3  -5   7   21.00    3.40
  -3  -5  -7   18.13    3.51
   3  -5   7   30.12    6.74
   3  -5   7   19.85    3.84
   3   5   7   22.17    4.36
   3   5   7   27.47    7.12
   3   5   7   21.49    2.70
  -3   5  -7   21.76    2.92
   4  -5   7    5.71    2.61
  -4  -5  -7    6.73    2.35
   4  -5   7    5.08    6.53
  -4  -5  -7    0.14    2.03
   4   5   7    2.99    3.95
  -4   5  -7    4.62    2.16
   4   5   7    4.15    2.67
  -5  -5  -7   13.82    2.70
   5  -5   7   16.24    3.62
  -5  -5  -7   18.74    2.82
  -5   5  -7   22.49    3.33
   5   5   7   18.90    4.78
  -6  -5  -7   24.20    3.66
   6  -5   7   23.79    4.81
   6   5   7   14.61    5.78
  -6   5  -7   27.62    3.78
   7  -5   7   50.06    7.10
  -7  -5  -7   45.92    6.42
  -7   5  -7   50.80    5.19
   7   5   7   38.65    7.86
   7  -6  -7   -9.06    5.56
  -7  -6   7    3.71    3.98
  -7   6   7   -1.94    4.99
  -7   6   7   -0.18    3.88
  -6  -6   7    1.08    3.66
  -6   6   7    2.99    4.05
  -6   6   7   -1.92    4.51
  -6   6   7    0.99    3.62
   5  -6  -7   61.35    7.13
  -5  -6   7   64.69    5.78
  -5   6   7   68.88    6.66
  -5   6   7   61.04    6.01
  -5   6   7   65.88    5.41
   4  -6  -7    9.35    3.05
   4  -6  -7    9.74    3.72
  -4  -6   7    7.51    2.72
   4   6  -7    8.76    4.88
  -4   6   7    6.31    2.87
  -4   6   7    8.30    2.61
   3  -6  -7  150.23   10.68
  -3  -6   7  153.83    9.66
   3  -6  -7  150.35    9.48
  -3   6   7  156.99    8.04
   3   6  -7  135.31   10.56
  -3   6   7  154.69    9.24
   2  -6  -7   30.39    6.23
  -2  -6   7   28.81    3.98
   2  -6  -7   30.02    4.57
   2   6  -7   22.55    3.95
  -2   6   7   29.24    2.83
   2   6  -7   32.30    8.55
  -2   6   7   34.54    4.32
  -2   6   7   35.77    3.88
   1  -6  -7   81.69    6.05
  -1  -6   7   81.40    4.36
  -1  -6   7   83.64    6.42
   1  -6  -7   91.82    8.91
   1  -6  -7   93.46    6.56
  -1  -6   7   81.45    5.98
  -1  -6   7   96.37    6.27
  -1   6   7   81.87    5.80
   1   6  -7   89.45    6.11
   1   6  -7   74.30    5.74
   1   6  -7   98.35    9.27
  -1   6   7   80.17    5.65
  -1   6   7   95.13    6.66
  -1   6   7   88.47    5.22
   0  -6   7    0.48    1.62
   0  -6   7    2.33    2.05
   0  -6   7    4.16    2.88
   0  -6   7    0.10    1.93
   0  -6   7   -1.19    1.44
   0  -6  -7    0.41    1.96
   0  -6  -7    2.27    5.34
   0  -6  -7   -1.83    2.35
   0   6   7    1.13    1.99
   0   6  -7    2.13    2.39
   0   6  -7    1.36    2.14
   0   6   7   -2.01    3.02
   0   6  -7    0.13    4.29
   0   6   7    1.26    1.55
   0   6   7    1.10    2.93
   1  -6   7    8.78    1.53
   1  -6   7   11.08    2.65
  -1  -6  -7    3.68    3.09
   1  -6   7   10.67    1.79
  -1  -6  -7    8.38    2.09
   1  -6   7   14.63    2.55
   1  -6   7   13.49    4.44
   1   6   7   10.11    1.69
   1   6   7   10.45    4.03
  -1   6  -7    2.99    4.59
   1   6   7    5.42    3.46
   2  -6   7   29.01    4.32
  -2  -6  -7   23.58    4.89
   2  -6   7   29.49    3.30
   2  -6   7   34.02    7.20
  -2  -6  -7   31.17    3.93
   2  -6   7   30.62    4.06
   2  -6   7   35.89    3.72
   2   6   7   25.65    4.52
   2   6   7   34.21    4.20
   2   6   7   22.74    4.73
   2   6   7   31.34    2.57
   3  -6   7  146.36    9.64
  -3  -6  -7  137.08    9.42
   3  -6   7  149.47    9.41
   3  -6   7  133.53   12.93
   3  -6   7  147.27    9.31
   3   6   7  135.61    7.06
   3   6   7  132.32   12.77
   3   6   7  129.26   10.51
  -3   6  -7  159.17    7.49
  -4  -6  -7   11.16    2.68
  -4  -6  -7   22.20    3.23
   4  -6   7   14.27    3.44
   4  -6   7   16.77    2.92
   4   6   7    5.86    7.44
  -4   6  -7   23.06    2.89
   4   6   7   10.08    4.61
   4   6   7   17.11    2.89
  -5  -6  -7   87.21    7.42
   5  -6   7   94.36    7.31
  -5  -6  -7   87.57    5.62
   5   6   7   82.54    8.96
  -5   6  -7   94.17    5.41
  -6  -6  -7    1.21    3.39
   6  -6   7    0.78    4.12
   6   6   7   -1.48    6.46
  -6   6  -7    3.21    2.68
   7  -6   7   18.26    4.97
   7   6   7    8.13    7.75
  -7   6  -7    5.85    2.98
  -7  -7   7   -2.86    4.19
   7  -7  -7  -10.77    7.10
  -7  -7   7    5.61    4.14
  -7   7   7    5.03    4.91
  -7   7   7    2.89    5.49
   6  -7  -7   55.28    9.43
  -6  -7   7   65.92    6.43
  -6   7   7   60.53    5.70
  -6   7   7   66.80    7.19
  -5  -7   7    3.84    3.10
   5  -7  -7   -0.26    4.04
  -5   7   7   -0.39    3.36
  -5   7   7   -4.96    3.39
  -5   7   7    0.67    3.46
   4  -7  -7   10.49    3.79
  -4  -7   7    7.81    2.99
   4  -7  -7   10.42    3.14
   4   7  -7    6.82    5.27
  -4   7   7    5.55    3.09
  -4   7   7   11.37    2.80
  -4   7   7   11.14    3.06
   3  -7  -7    6.91    3.32
  -3  -7   7   10.48    3.08
  -3   7   7    8.01    2.25
   3   7  -7    3.19    8.67
   3   7  -7    3.48    4.41
  -3   7   7    7.91    2.80
   2  -7  -7   70.52   10.11
  -2  -7   7   82.36    5.88
   2  -7  -7   69.06    6.08
  -2   7   7   72.66    5.31
   2   7  -7   68.29    5.81
  -2   7   7   70.87    4.86
  -2   7   7   66.33    6.17
   2   7  -7   84.00   10.65
   1  -7  -7    8.28    2.56
  -1  -7   7   10.24    1.52
   1  -7  -7   10.28    2.61
  -1  -7   7   10.13    2.56
   1  -7  -7   15.86    5.86
  -1  -7   7   14.37    2.60
   1   7  -7   12.68    2.26
  -1   7   7   11.10    3.14
  -1   7   7   10.57    2.58
   1   7  -7   18.41    6.10
   1   7  -7    6.50    2.12
  -1   7   7    8.58    2.04
   0  -7   7  199.92    9.44
   0  -7   7  189.72   12.09
   0  -7  -7  197.77   12.39
   0  -7  -7  195.23   16.84
   0  -7   7  211.76   11.85
   0   7   7  182.05   15.09
   0   7   7  193.77   11.48
   0   7  -7  184.62   11.93
   0   7   7  174.81   12.10
   0   7   7  186.76   12.38
   0   7  -7  199.88   15.87
   1  -7   7   15.09    2.87
   1  -7   7   19.72    2.37
   1  -7   7   30.60    7.77
  -1  -7  -7    9.55    4.73
  -1  -7  -7   23.06    4.21
   1  -7   7   18.38    2.53
   1  -7   7   27.68    3.82
   1   7   7   20.44    2.24
   1   7   7   24.38    5.56
  -1   7  -7   24.48    6.25
   1   7   7   27.16    5.02
   1   7   7   20.46    3.70
   2  -7   7  127.34    8.59
  -2  -7  -7  118.73    8.58
   2  -7   7  127.95    8.44
   2  -7   7  129.41   11.74
  -2  -7  -7  115.34    9.65
   2  -7   7  117.89    8.21
   2  -7   7  128.29    6.83
   2   7   7  110.78    5.89
   2   7   7  117.98    9.72
   2   7   7  116.57    8.22
   2   7   7  127.22   10.94
   3  -7   7   -4.39    2.97
   3  -7   7    1.38    3.18
   3  -7   7   -0.56    2.86
  -3  -7  -7   -5.78    2.57
   3   7   7    1.60    1.84
  -3   7  -7    1.20    2.24
   3   7   7    2.88    5.70
   3   7   7   -3.11    5.03
   4  -7   7   -0.53    2.78
   4  -7   7    3.90    3.24
  -4  -7  -7   -4.90    2.49
   4   7   7   -7.65    5.35
   4   7   7    6.09    7.15
  -4   7  -7    0.51    2.34
  -5  -7  -7    0.51    3.18
   5  -7   7    1.64    3.72
  -5  -7  -7   -2.90    3.53
  -5   7  -7    3.96    2.54
   5   7   7   -0.45    5.35
   5   7   7  -10.14    8.62
   6  -7   7   41.69    7.10
  -6  -7  -7   44.36    5.53
   6   7   7   26.80    7.14
   6   7   7   27.20   13.06
  -6   7  -7   49.67    4.63
   7  -7   7    4.65    5.71
   7   7   7  -14.68   15.63
   7   7   7   -2.54    8.35
  -6  -8   7   -1.13    4.16
   6  -8  -7   -1.93    5.67
  -6   8   7   -0.39    3.97
  -6   8   7    1.42    4.50
   5  -8  -7   24.44    5.06
  -5  -8   7   29.20    4.99
  -5   8   7   37.53    5.71
  -5   8   7   33.20    5.46
  -4  -8   7   32.35    5.30
   4  -8  -7   36.22    6.11
  -4   8   7   36.22    4.42
  -4   8   7   36.00    4.84
   4   8  -7   30.18   10.92
  -3  -8   7  191.44   12.40
   3  -8  -7  198.80   13.52
   3   8  -7  191.35   19.08
  -3   8   7  196.59   11.57
  -3   8   7  197.23   10.28
  -3   8   7  216.69   10.07
  -2  -8   7   20.59    3.16
   2  -8  -7   36.68    4.85
  -2   8   7   24.25    4.75
   2   8  -7   40.99    9.61
  -2   8   7   28.15    3.77
  -1  -8   7   62.48    5.11
   1  -8  -7   67.89   10.15
   1  -8  -7   63.69    5.67
  -1  -8   7   52.61    4.26
   1   8  -7   60.07    9.14
  -1   8   7   47.99    3.95
  -1   8   7   54.22    5.69
  -1   8   7   57.21    4.59
   0  -8   7    2.62    3.19
   0  -8  -7    2.02    4.73
   0  -8  -7    2.36    7.70
   0  -8   7    1.24    1.85
   0  -8   7   -0.81    2.52
   0  -8  -7   -0.86    2.45
   0  -8   7    3.26    2.66
   0   8   7    0.10    3.98
   0   8  -7   -1.17    3.93
   0   8  -7   -2.10    5.32
   0   8   7    4.79    3.48
   0   8   7    2.48    2.25
   0   8   7    1.02    1.97
   1  -8   7    9.32    2.38
  -1  -8  -7    0.26    5.16
  -1  -8  -7    7.24    2.65
   1  -8   7   10.77    3.05
   1  -8   7   10.23    5.89
   1  -8   7    9.57    2.75
   1   8   7    6.87    4.48
   1   8   7    6.83    3.94
  -1   8  -7    4.33    5.91
   1   8   7    8.92    2.54
   1   8   7    8.73    1.31
   2  -8   7   10.20    3.44
  -2  -8  -7   10.83    2.82
   2  -8   7   14.23    3.08
   2  -8   7   10.87    3.12
   2   8   7   14.55    3.61
   2   8   7   14.00    5.06
   2   8   7   16.43    5.04
   3  -8   7  102.10    8.44
   3  -8   7  100.05    7.77
  -3  -8  -7   95.93    7.79
   3  -8   7  114.30    7.70
   3   8   7   85.45    9.58
   3   8   7   93.23   11.56
  -3   8  -7  103.66    6.02
   4  -8   7   50.88    6.33
  -4  -8  -7   45.10    5.89
   4  -8   7   48.39    6.26
   4  -8   7   52.36    5.98
   4   8   7   71.85   11.25
   4   8   7   38.08    7.81
  -4   8  -7   54.18    4.07
  -5  -8  -7   41.56    6.83
   5  -8   7   42.77    6.45
   5   8   7   40.27   10.40
   5   8   7   30.24    7.39
  -5   8  -7   44.14    4.42
   6  -8   7   10.02    5.11
   6   8   7    5.53    7.24
  -6   8  -7   11.82    3.34
   6   8   7   19.50   11.02
   6  -9  -7    1.20    6.34
  -6  -9   7   11.40    4.78
  -6   9   7    9.07    4.89
  -6   9   7    5.82    4.98
  -5  -9   7   18.26    4.07
   5  -9  -7   15.76    5.08
   5   9  -7   14.96   11.12
  -5   9   7   26.37    4.38
  -5   9   7   23.81    4.33
   4  -9  -7    2.49    3.85
  -4  -9   7   -1.02    3.14
  -4   9   7   -4.84    3.41
  -4   9   7   -0.32    2.87
   4   9  -7   -0.34    9.45
  -3  -9   7    9.09    3.15
   3  -9  -7    2.07    3.47
   3   9  -7   12.67    9.04
  -3   9   7   11.55    2.94
  -3   9   7    8.47    2.60
  -2  -9   7   12.72    3.34
   2  -9  -7    6.54    3.11
  -2   9   7   14.65    2.57
  -2   9   7   11.44    2.68
   2   9  -7    6.99    7.44
   1  -9  -7  103.21    8.25
  -1  -9   7  114.03    7.71
  -1   9   7  108.27    6.93
   1   9  -7  106.43   11.96
  -1   9   7  101.27    8.56
   0  -9  -7   33.05    9.96
   0  -9  -7   26.02    4.41
   0  -9   7   22.59    3.64
   0  -9   7   31.60    4.87
   0  -9   7   32.30    4.40
   0   9   7   26.61    5.61
   0   9   7   25.17    3.58
   0   9  -7   30.55    6.98
   0   9   7   31.56    3.86
  -1  -9  -7   91.15    7.38
   1  -9   7   89.64    6.08
   1  -9   7   83.03    6.76
   1  -9   7   90.96    6.98
   1   9   7   93.46    7.76
   1   9   7   82.42    6.61
   1   9   7   93.22    9.58
  -1   9  -7  108.99   12.48
   2  -9   7   20.31    4.18
   2  -9   7   18.07    3.91
  -2  -9  -7   13.14    3.58
   2  -9   7   17.17    3.72
   2   9   7   21.03    3.72
   2   9   7   19.25    6.01
   2   9   7   17.75    5.20
   3  -9   7   23.00    4.47
   3  -9   7   16.79    3.60
   3  -9   7   17.97    4.34
  -3  -9  -7   14.78    3.45
   3   9   7   20.81    5.91
  -3   9  -7   21.89    3.13
   3   9   7   26.57    7.32
   4  -9   7    2.58    4.07
  -4  -9  -7   -6.23    3.46
   4  -9   7    6.39    3.99
   4  -9   7    1.05    4.07
   4   9   7   -3.58    5.66
   4   9   7    3.26    7.66
  -4   9  -7    3.65    2.93
   5  -9   7   17.06    5.34
  -5  -9  -7    4.36    4.69
   5  -9   7    4.59    4.43
   5   9   7    5.16    6.68
   5   9   7   30.37   10.79
  -5   9  -7    5.20    3.18
   6  -9   7    9.43    5.55
   6   9   7   25.28   13.45
   6   9   7   -4.34    8.88
  -6   9  -7    6.66    3.66
   6 -10  -7   -2.37    6.69
  -6 -10   7   14.26    5.47
   6  10  -7  -10.70   11.67
  -6  10   7   11.25    5.43
  -6  10   7    8.82    4.74
   5 -10  -7   -5.40    4.88
  -5 -10   7    1.01    3.94
  -5  10   7   -0.71    4.07
   5  10  -7    0.53   10.49
  -5  10   7   -1.41    4.22
   4 -10  -7   67.05    7.85
  -4 -10   7   75.53    7.37
  -4  10   7   65.61    6.09
  -4  10   7   73.19    6.02
   4  10  -7   71.75   14.61
  -3 -10   7   -3.02    3.20
   3 -10  -7    1.94    2.99
   3  10  -7    3.98    7.89
  -3  10   7    7.51    3.15
  -3  10   7    3.56    2.63
  -2 -10   7  115.55    8.36
   2 -10  -7  122.91    8.75
   2  10  -7  119.65   14.09
  -2  10   7  113.53    6.34
  -2  10   7  116.20    7.34
  -1 -10   7    5.57    2.69
   1 -10  -7   -2.54    2.99
  -1  10   7    3.82    3.94
  -1  10   7   -5.05    2.65
  -1  10   7    0.11    1.78
   1  10  -7    0.81    6.79
   0 -10  -7   -3.90    3.04
   0 -10   7    2.78    3.00
   0 -10   7    4.42    2.95
   0 -10   7    3.19    3.25
   0  10   7    2.08    2.53
   0  10   7    2.43    2.32
   0  10  -7    2.94    7.60
   0  10   7    3.77    3.95
   0  10   7   -7.01    2.82
   0  10   7   -0.80    4.75
  -1 -10  -7   -3.77    2.96
   1 -10   7    0.47    2.79
   1 -10   7    1.87    3.17
   1 -10   7   -2.79    3.13
   1  10   7    1.19    5.70
  -1  10  -7   -3.45    7.20
   1  10   7   -2.14    3.20
   1  10   7   -0.05    4.67
  -2 -10  -7   90.73    8.02
   2 -10   7   90.50    7.36
   2 -10   7  101.33    7.24
   2 -10   7  103.31    8.79
   2  10   7   98.28    8.35
   2  10   7  103.63   11.48
   2  10   7   76.83    8.96
   3 -10   7   -5.55    3.66
   3 -10   7    0.72    3.69
   3 -10   7   -2.96    4.23
   3  10   7    9.06    7.63
   3  10   7   -4.06    5.99
   4 -10   7   84.24    7.82
   4 -10   7   70.94    7.17
   4 -10   7   58.16    9.09
  -4 -10  -7   61.30    7.81
   4  10   7   53.81    9.94
  -4  10  -7   74.42    5.80
   4  10   7   84.01   13.61
   5 -10   7   -1.25    5.43
   5 -10   7    1.41    5.19
  -5 -10  -7   -2.47    4.87
  -5  10  -7   -1.44    3.52
   5  10   7   -4.28    8.21
   5  10   7    6.97   10.35
   6 -10   7   22.22    6.60
   6  10   7   22.36   15.16
  -6  10  -7   17.07    4.50
  -5 -11   7   40.16    7.54
   5 -11  -7   23.09    5.34
   5  11  -7   26.12   12.14
  -5  11   7   29.87    5.30
  -5  11   7   31.48    4.99
  -4 -11   7   -3.10    4.35
   4 -11  -7   -0.22    4.16
  -4  11   7   -0.49    3.78
  -4  11   7    0.85    3.13
   4  11  -7   22.05   11.02
  -3 -11   7    5.56    4.11
   3 -11  -7    7.57    3.80
  -3  11   7    4.87    2.87
  -3  11   7    5.00    3.17
   3  11  -7   25.68    9.89
  -2 -11   7    9.68    3.80
   2 -11  -7    5.11    2.83
  -2  11   7    7.79    2.51
   2  11  -7   20.84    8.84
  -2  11   7   10.67    3.02
   1 -11  -7   92.49    7.56
  -1 -11   7   91.98    6.88
  -1  11   7   70.08    7.55
   1  11  -7   83.65   11.89
  -1  11   7   76.23    5.97
  -1  11   7   76.68    4.44
   0 -11   7   11.37    3.55
   0 -11  -7   10.41    3.69
   0 -11   7   12.02    3.36
   0  11  -7   16.03    8.01
   0  11   7   17.14    4.58
   0  11   7   14.45    3.81
   0  11   7   12.05    5.72
   1 -11   7   96.29    7.00
  -1 -11  -7   83.00    7.78
   1 -11   7   67.95    6.96
   1 -11   7   89.55    8.93
   1  11   7   77.96    8.37
  -1  11  -7   93.04    5.77
  -1  11  -7   93.15   12.70
   1  11   7   79.55   11.10
   2 -11   7    6.30    3.77
   2 -11   7    7.81    4.78
   2 -11   7    0.85    3.59
  -2 -11  -7    3.16    3.74
   2  11   7   18.98    7.36
   2  11   7    8.74    5.57
  -3 -11  -7   10.08    4.04
   3 -11   7   16.50    5.37
   3 -11   7   16.07    4.27
   3 -11   7   13.63    3.74
   3  11   7   26.39    8.56
   3  11   7   19.32    6.44
   4 -11   7    3.97    5.77
   4 -11   7    1.71    4.25
   4 -11   7   -0.21    4.86
   4  11   7   -1.01    7.52
   4  11   7    4.80   10.36
  -4  11  -7   -3.95    3.53
   5 -11   7    7.93    6.27
   5 -11   7   22.13    6.78
  -5 -11  -7    6.27    5.78
  -5  11  -7   15.70    4.42
   5  11   7   11.23   13.11
  -5 -12   7   17.23    6.16
   5 -12  -7   16.32    6.03
  -5  12   7   18.62    4.44
   5  12  -7   49.44   13.76
  -5  12   7   19.17    5.54
   4 -12  -7    6.45    4.17
  -4 -12   7   18.79    5.09
  -4  12   7   12.12    3.54
  -4  12   7    9.93    4.19
   3 -12  -7   60.08    7.09
  -3 -12   7   56.26    7.36
   3  12  -7   63.73   14.30
  -3  12   7   52.59    5.15
  -3  12   7   47.10    5.67
   2 -12  -7   28.23    5.47
  -2 -12   7   29.44    6.09
   2  12  -7   30.94    9.98
  -2  12   7   30.77    4.47
  -1 -12   7   34.59    5.81
   1 -12  -7   37.38    5.99
   1  12  -7   46.28    9.59
  -1  12   7   36.15    5.61
   0 -12   7    1.48    3.34
   0 -12  -7   -4.00    3.81
   0  12   7    2.67    5.30
   0  12  -7    1.25    8.73
   0  12   7   -8.61    3.96
   0  12   7    1.26    6.10
   0  12  -7   -1.13    2.64
   1 -12   7   -3.21    4.65
  -1 -12  -7   -3.56    3.72
   1 -12   7    6.28    3.79
   1  12   7   10.08    4.04
   1  12   7    7.41    5.35
  -1  12  -7    6.02    2.91
  -1  12  -7   -1.43    8.44
   1  12   7   -0.22    6.65
   2 -12   7   17.66    4.68
  -2 -12  -7   17.10    4.49
   2 -12   7   27.58    5.09
   2 -12   7   16.01    5.21
   2  12   7   27.77    7.88
   2  12   7   16.95    6.13
   3 -12   7   31.73    5.51
   3 -12   7   38.76    5.83
   3 -12   7   33.48    6.74
  -3 -12  -7   26.03    5.16
   3  12   7   40.70   10.02
   3  12   7   30.72    7.94
   4 -12   7   33.91    5.92
  -4 -12  -7   21.96    6.18
   4  12   7   26.20   10.87
  -5 -12  -7   18.01    7.00
   5 -12   7   24.16    7.31
  -5  12  -7   20.10    5.16
   5  12   7   34.00   13.84
   4 -13  -7    0.33    5.05
  -4 -13   7   10.23    5.59
   4  13  -7   32.27   13.50
  -4  13   7    3.99    3.69
   3 -13  -7   -0.84    3.54
  -3 -13   7    5.46    4.85
  -3  13   7   -3.69    3.23
   3  13  -7   12.88   11.56
  -2 -13   7   36.24    6.70
   2 -13  -7   24.21    5.18
   2  13  -7   33.42   10.54
  -2  13   7   24.02    3.70
  -1 -13   7    7.29    4.22
   1  13  -7    3.99    8.26
  -1  13   7    5.84    3.60
   0 -13  -7   76.40    8.28
   0 -13   7   84.21    7.61
   0  13   7   74.10    7.31
   0  13  -7  101.39   14.38
   0  13   7   73.33   11.58
   0  13   7   71.04    8.94
   0  13  -7   77.93    6.36
  -1 -13  -7   -4.91    3.63
   1 -13   7   -0.23    4.17
   1 -13   7   -3.66    5.41
   1  13   7   -2.91    5.15
  -1  13  -7    0.42    3.65
   1  13   7   -0.06    7.60
  -1  13  -7   -1.32    9.12
   1  13   7   -0.14    6.02
   2 -13   7   52.69    9.23
   2 -13   7   71.24    7.22
  -2 -13  -7   48.20    8.20
   2  13   7   55.20    9.69
  -2  13  -7   54.72    6.34
   2  13   7   69.06   12.58
   3 -13   7   -4.04    6.96
   3  13   7   17.53   10.79
  -4 -13  -7   -6.21    6.40
   4  13   7    4.68   11.57
   3 -14  -7   53.80    7.95
  -3 -14   7   55.90    8.61
   3  14  -7   67.42   16.81
  -3  14   7   46.65    5.72
   2 -14  -7    0.61    4.27
  -2 -14   7   10.61    4.97
   2  14  -7   36.64   11.61
  -2  14   7    7.86    4.41
   1 -14  -7   15.01    4.71
  -1 -14   7   26.02    4.84
  -1  14   7   16.64    4.38
   1  14  -7   39.56   11.45
   0 -14   7    1.75    6.27
   0 -14   7   -1.41    4.69
   0 -14  -7    3.22    4.57
   0  14   7    5.35    8.12
   0  14  -7   12.30   10.76
   0  14   7    5.07    4.64
  -1 -14  -7   -1.70    4.94
   1 -14   7    6.52    4.44
   1 -14   7    3.54    6.38
   1  14   7   -5.89    5.98
   1  14   7    5.88    8.81
  -1  14  -7    4.61    4.34
  -1  14  -7   16.70   10.81
  -2 -14  -7  -10.35    5.22
   2 -14   7   -4.87    7.44
   2  14   7   11.75   10.11
   2  14   7    1.41    6.77
  -2  14  -7    7.11    4.23
   3 -14   7   35.89    9.22
  -3 -14  -7   33.76    6.89
   3  14   7   66.87   14.92
  -2 -15   7   12.10    5.62
   2 -15  -7    1.82    4.67
   2  15  -7   24.18   13.30
  -2  15   7    2.52    4.80
   1 -15  -7   11.48    4.99
  -1 -15   7   25.08    6.20
   1  15  -7   24.15   12.84
  -1  15   7   15.60    5.48
   0 -15   7   25.63    7.55
   0 -15  -7   16.47    5.48
   0  15  -7   50.11   12.91
   0  15   7   20.84    5.76
   0  15   7   33.00   10.09
   1 -15   7   19.12    7.76
  -1 -15  -7   17.48    6.08
   1  15   7   23.06   10.15
   1  15   7   19.17    7.21
  -1  15  -7   47.11   12.52
   2 -15   7   12.59    9.02
  -2 -15  -7    7.75    6.18
   2  15   7    9.51   12.96
   2  15   7   11.00    6.90
  -7   0   8   -1.79    4.76
  -7   0   8    0.54    2.68
  -6   0   8   22.18    4.67
  -5   0   8   -0.07    2.37
   5   0  -8   -2.82    3.93
  -5   0   8    3.66    2.92
  -4   0   8  179.43   11.23
   4   0  -8  182.27   12.78
  -4   0   8  182.40    9.07
   3   0  -8   -2.23    3.11
  -3   0   8   -1.81    1.58
   3   0  -8    3.63    1.65
   3   0  -8    0.68    2.15
  -3   0   8    0.52    2.03
  -3   0   8   -0.04    2.68
  -2   0   8  197.57   11.75
   2   0  -8  192.96   11.92
   2   0  -8  176.26   11.39
  -2   0   8  197.49    9.40
   2   0  -8  204.11   12.68
  -2   0   8  217.04   12.24
  -2   0   8  175.98   12.10
   1   0  -8    1.38    2.60
   1   0  -8    2.28    1.82
   1   0  -8    0.95    1.27
  -1   0   8    0.93    3.26
  -1   0   8   -1.43    2.33
  -1   0   8   -2.68    1.66
   0   0  -8    2.67    2.41
   0   0   8   -0.67    2.81
   0   0   8    0.69    1.96
   0   0   8    0.30    1.85
   0   0  -8    0.65    1.71
   1   0   8   -0.04    2.86
   1   0   8   -0.61    1.57
  -1   0  -8    2.42    1.38
   1   0   8   -0.46    1.42
   1   0   8   -1.13    1.78
  -1   0  -8   -1.62    1.98
   2   0   8  277.59   12.28
  -2   0  -8  244.46   15.69
   2   0   8  267.40   16.12
   3   0   8   -0.76    2.79
  -3   0  -8   -0.49    1.82
   4   0   8  184.61   12.12
  -4   0  -8  185.58    9.19
   5   0   8    5.23    2.85
  -5   0  -8   -1.06    2.37
   6   0   8   32.60    5.60
  -6   0  -8   24.01    3.47
  -7   0  -8    6.91    3.84
   7   0   8   -0.56    4.52
   7  -1  -8   16.29    6.05
  -7   1   8   39.60    7.67
   7   1  -8   26.40    5.45
  -7   1   8   34.58    4.43
  -6  -1   8    4.99    4.21
  -6   1   8    1.59    3.62
   6   1  -8   -2.50    4.17
  -6   1   8   -0.28    3.42
  -5  -1   8   46.07    4.86
   5  -1  -8   28.16    5.20
   5   1  -8   35.82    6.01
  -5   1   8   43.37    4.42
  -5   1   8   50.69    5.48
   4  -1  -8   -1.49    3.63
  -4  -1   8    0.42    1.67
  -4  -1   8    2.06    2.51
  -4   1   8    1.52    2.44
   4   1  -8   -0.89    3.55
  -4   1   8    2.73    2.01
  -3  -1   8   24.48    3.61
   3  -1  -8   21.59    3.45
   3  -1  -8   29.38    5.15
  -3  -1   8   20.64    2.52
   3   1  -8   22.35    4.02
   3   1  -8   21.38    4.54
  -3   1   8   21.81    3.53
   3   1  -8   22.01    2.56
  -3   1   8   18.99    2.80
  -3   1   8   14.48    2.94
  -2  -1   8   29.72    3.32
  -2  -1   8   38.30    2.81
  -2  -1   8   34.67    4.21
   2  -1  -8   34.09    3.28
   2  -1  -8   35.98    4.79
   2  -1  -8   30.96    3.42
  -2  -1   8   33.89    3.53
   2   1  -8   35.59    2.90
   2   1  -8   41.52    4.81
  -2   1   8   34.85    4.29
  -2   1   8   31.57    3.45
  -2   1   8   36.69    3.82
   2   1  -8   31.62    3.68
  -2   1   8   34.97    3.13
   1  -1  -8  221.77   13.16
   1  -1  -8  231.68   14.08
   1  -1  -8  212.64   13.51
  -1  -1   8  203.33   14.04
  -1  -1   8  227.31   13.85
  -1  -1   8  228.71   13.43
  -1   1   8  242.95   14.16
   1   1  -8  244.82   14.25
  -1   1   8  199.28   13.41
   1   1  -8  242.09   13.12
   1   1  -8  206.45   13.65
   0  -1   8   24.19    4.56
   0  -1   8   18.68    3.43
   0  -1  -8   25.33    3.40
   0  -1   8   25.26    3.78
   0  -1  -8   26.29    3.77
   0   1   8   21.51    3.23
   0   1   8   21.55    4.35
   0   1   8   23.37    3.19
   0   1  -8   18.01    3.33
   0   1  -8   23.16    4.01
   1  -1   8  125.52    6.85
  -1  -1  -8  158.64    9.02
   1  -1   8  126.58    8.82
  -1  -1  -8  142.85    8.97
   1  -1   8  150.78    9.58
  -1   1  -8  144.83    8.87
   1   1   8  140.22    9.44
   1   1   8  138.30    8.86
   2  -1   8   23.22    2.17
  -2  -1  -8   26.44    2.85
   2  -1   8   28.12    3.51
   2  -1   8   26.55    3.75
  -2   1  -8   24.57    2.89
   2   1   8   27.07    3.95
   2   1   8   26.92    2.38
  -3  -1  -8   13.28    2.12
   3  -1   8   24.20    4.78
   3  -1   8   19.75    3.92
   3   1   8   15.90    2.63
  -3   1  -8   11.90    2.16
   3   1   8   17.51    3.46
  -4  -1  -8    1.78    2.13
   4  -1   8    4.32    3.03
   4   1   8    0.51    2.75
  -4   1  -8   -0.18    2.04
   5  -1   8   23.92    4.77
  -5  -1  -8   31.09    3.72
  -5   1  -8   29.02    3.64
   5   1   8   31.77    4.70
  -6  -1  -8   19.22    3.33
   6  -1   8   20.63    4.44
  -6   1  -8   20.28    2.98
   6   1   8   19.29    4.34
   7  -1   8   48.94    6.46
  -7  -1  -8   64.16    6.18
   7   1   8   52.35    7.99
  -7   1  -8   70.35    6.10
  -7  -2   8    1.73    4.38
   7   2  -8   -0.17    5.02
  -7   2   8   -2.11    2.86
  -7   2   8    0.41    5.31
  -6  -2   8   32.24    5.89
  -6   2   8   31.59    3.70
   6   2  -8   24.44    4.86
  -6   2   8   32.84    6.19
  -5  -2   8   57.97    5.60
   5  -2  -8   56.74    7.90
  -5   2   8   68.14    5.76
   5   2  -8   58.11    7.39
  -5   2   8   61.81    4.92
  -4  -2   8   60.39    5.40
   4  -2  -8   58.61    7.10
  -4   2   8   68.46    4.68
  -4   2   8   67.14    5.57
   4   2  -8   62.91    7.02
  -3  -2   8  135.41    8.78
  -3  -2   8  127.53    6.68
   3  -2  -8  133.63    8.86
   3  -2  -8  141.21    9.75
  -3   2   8  143.33    7.22
   3   2  -8  141.22    9.81
   3   2  -8  147.02   10.09
  -3   2   8  139.41    8.73
  -3   2   8  141.26    9.31
  -2  -2   8   29.68    3.80
  -2  -2   8   36.63    3.68
  -2  -2   8   36.20    2.56
   2  -2  -8   37.37    3.64
   2  -2  -8   35.78    3.50
  -2  -2   8   41.10    4.24
   2  -2  -8   39.49    4.95
   2   2  -8   31.08    2.76
  -2   2   8   37.11    3.27
   2   2  -8   41.30    5.02
  -2   2   8   40.00    3.78
  -2   2   8   33.39    3.40
  -2   2   8   39.91    4.46
   2   2  -8   40.19    4.58
   1  -2  -8   13.64    2.79
   1  -2  -8   16.58    2.95
  -1  -2   8    8.35    3.39
  -1  -2   8   10.08    2.28
  -1  -2   8   11.66    2.21
  -1   2   8   13.59    2.62
   1   2  -8   18.33    3.11
  -1   2   8    8.14    2.46
   1   2  -8   12.91    2.62
   1   2  -8   10.43    1.88
  -1   2   8   16.07    3.42
   0  -2  -8    0.87    2.06
   0  -2   8   -1.30    1.98
   0  -2  -8    1.50    2.27
   0  -2   8    1.64    1.95
   0  -2   8   -3.44    3.01
   0   2  -8    0.45    2.26
   0   2  -8   -3.27    2.55
   0   2   8    2.26    3.41
   0   2  -8   -0.43    1.97
   0   2   8    0.38    1.48
   0   2   8    1.98    2.06
  -1  -2  -8   82.54    5.63
  -1  -2  -8   73.33    5.50
   1  -2   8   88.39    5.71
   1  -2   8   80.57    5.87
   1  -2   8   75.04    6.35
   1   2   8   72.66    6.30
   1   2   8   78.23    5.61
  -1   2  -8   83.05    5.65
   2  -2   8   65.04    3.48
  -2  -2  -8   64.07    4.58
   2  -2   8   58.36    5.08
  -2  -2  -8   56.97    4.55
   2  -2   8   62.28    5.92
   2   2   8   65.56    3.78
  -2   2  -8   60.17    4.43
   2   2   8   57.34    5.55
   2   2   8   57.34    5.39
   3  -2   8  186.48   14.83
   3  -2   8  196.19   12.21
  -3  -2  -8  190.97    9.28
  -3   2  -8  200.14    9.42
   3   2   8  196.91    9.48
   3   2   8  180.32   12.26
  -4  -2  -8   47.38    3.70
   4  -2   8   39.37    7.67
   4  -2   8   37.83    4.54
   4   2   8   43.58    5.58
  -4   2  -8   44.65    3.65
  -5  -2  -8   47.96    4.12
   5  -2   8   47.26    5.39
   5   2   8   54.17    6.09
  -5   2  -8   41.52    4.03
   6  -2   8   10.69    3.65
  -6  -2  -8    6.65    3.15
  -6   2  -8    6.36    2.85
   6   2   8   15.09    4.50
  -7  -2  -8   -3.53    3.84
   7  -2   8    7.34    4.31
   7   2   8   -2.04    5.54
  -7   2  -8    0.85    3.71
  -7  -3   8    4.87    4.26
  -7   3   8    1.98    4.22
  -7   3   8    5.05    3.56
  -7   3   8    3.51    5.67
  -6  -3   8   56.85    5.94
  -6   3   8   57.38    6.28
  -6   3   8   56.08    7.05
  -5  -3   8    9.86    3.08
   5  -3  -8    5.36    3.66
   5   3  -8    8.08    3.79
  -5   3   8   10.64    3.60
  -5   3   8    9.23    3.16
   4  -3  -8   -1.64    3.17
   4  -3  -8    1.20    3.12
  -4  -3   8   -0.76    2.52
   4   3  -8   -2.73    2.98
   4   3  -8   -1.77    4.08
  -4   3   8   -0.48    2.32
  -4   3   8    1.61    2.78
  -3  -3   8    0.01    2.06
   3  -3  -8    2.80    3.12
   3  -3  -8    2.14    2.66
  -3   3   8    0.74    2.23
   3   3  -8    0.99    3.12
  -3   3   8    0.10    2.77
  -3   3   8    0.22    2.16
   3   3  -8    2.34    3.85
  -2  -3   8  140.91   10.57
   2  -3  -8  174.71   11.16
   2  -3  -8  165.99   10.26
  -2  -3   8  172.40   10.66
  -2  -3   8  177.45   10.31
   2  -3  -8  164.18   10.40
   2   3  -8  171.87   11.24
  -2   3   8  174.62   10.12
  -2   3   8  174.74   10.84
  -2   3   8  183.48    8.59
   2   3  -8  164.38   11.05
   2   3  -8  149.52    9.83
  -2   3   8  160.89   10.52
   1  -3  -8   20.48    3.17
   1  -3  -8   16.16    3.40
  -1  -3   8   22.60    3.30
   1  -3  -8   19.59    3.75
  -1  -3   8   12.21    3.36
   1   3  -8   15.43    3.20
  -1   3   8   14.21    3.38
   1   3  -8   22.03    4.38
  -1   3   8   24.03    2.88
   1   3  -8   21.42    2.28
  -1   3   8   12.51    2.60
   0  -3   8  393.01   21.45
   0  -3   8  342.90   21.58
   0  -3  -8  338.59   21.25
   0  -3  -8  348.33   26.13
   0  -3  -8  339.08   21.57
   0  -3   8  359.31   20.82
   0   3   8  338.57   20.65
   0   3   8  371.51   21.60
   0   3   8  363.15   21.61
   0   3  -8  356.65   21.15
   0   3  -8  392.59   26.39
  -1  -3  -8    4.45    1.91
   1  -3   8    1.90    2.12
   1  -3   8    3.88    1.52
  -1  -3  -8    6.02    1.85
   1  -3   8    4.51    1.91
   1  -3   8    2.71    3.08
   1  -3   8    3.24    2.78
   1   3   8    3.17    1.81
   1   3   8    3.70    2.07
   1   3   8    7.62    2.87
  -1   3  -8    2.68    1.80
   2  -3   8   89.91    6.92
   2  -3   8  111.83    8.73
  -2  -3  -8   94.44    6.56
   2  -3   8  112.01    7.37
   2  -3   8   87.42    5.25
   2   3   8   86.42    5.42
   2   3   8  109.99    8.36
   2   3   8  111.76    7.90
  -2   3  -8  103.07    6.83
   3  -3   8   -0.12    3.79
  -3  -3  -8    0.86    1.47
   3  -3   8    0.29    2.29
   3   3   8   -3.01    2.16
  -3   3  -8    1.83    1.98
   3   3   8   -1.42    3.27
   4  -3   8   22.49    5.95
   4  -3   8   29.88    4.50
  -4  -3  -8   28.69    3.61
  -4   3  -8   32.47    3.29
   4   3   8   29.50    5.53
  -5  -3  -8    1.01    2.44
   5  -3   8    5.80    3.10
  -5   3  -8   -2.11    2.17
   5   3   8    0.37    3.37
  -6  -3  -8   83.18    5.88
   6  -3   8   72.32    7.20
   6   3   8   75.49    8.50
  -6   3  -8   89.96    5.70
  -7  -3  -8    5.44    4.10
   7  -3   8    0.29    4.19
  -7   3  -8    3.24    3.03
   7   3   8   -2.22    6.19
  -7  -4   8    5.93    4.07
  -7   4   8    2.40    3.85
  -7   4   8    1.21    4.72
  -7   4   8    3.97    5.86
  -6  -4   8    5.66    3.44
  -6   4   8    4.22    3.27
  -6   4   8    3.71    3.85
  -6   4   8    5.17    4.44
  -5  -4   8   83.68    6.89
   5  -4  -8   76.15    8.66
  -5   4   8   92.60    7.23
  -5   4   8  104.20    6.49
   4  -4  -8   14.06    4.02
   4  -4  -8   24.11    4.46
  -4  -4   8   19.53    3.92
  -4   4   8   17.08    2.89
   4   4  -8   13.47    4.76
  -4   4   8   18.72    3.39
  -3  -4   8  118.73    7.99
   3  -4  -8  119.53    8.85
   3  -4  -8  123.63    8.08
  -3   4   8  132.78    6.92
   3   4  -8  111.96    9.18
  -3   4   8  114.85    7.80
  -2  -4   8    4.76    2.73
   2  -4  -8    8.50    4.54
   2  -4  -8    5.69    2.33
   2  -4  -8   -0.21    2.42
  -2  -4   8    2.72    2.09
  -2   4   8    3.82    2.27
  -2   4   8    7.52    2.52
  -2   4   8    3.39    1.40
  -2   4   8    5.24    1.88
   2   4  -8   -2.03    3.89
  -1  -4   8   29.04    3.89
   1  -4  -8   29.11    5.65
   1  -4  -8   21.05    2.81
  -1  -4   8   19.62    3.31
  -1  -4   8   22.84    2.03
   1  -4  -8   28.56    4.02
  -1  -4   8   22.27    4.56
   1   4  -8   27.34    4.47
  -1   4   8   26.09    3.05
  -1   4   8   15.39    3.33
  -1   4   8   28.84    4.42
   1   4  -8   35.91    6.00
   1   4  -8   22.21    2.51
   0  -4   8   -3.95    2.32
   0  -4  -8   -3.27    2.05
   0  -4   8   -0.42    1.44
   0  -4  -8    1.77    3.60
   0  -4   8    4.23    3.14
   0  -4   8    0.53    1.91
   0  -4  -8    3.09    1.88
   0  -4   8   -0.59    1.40
   0   4  -8   -3.12    3.24
   0   4   8   -0.63    1.80
   0   4   8    0.73    2.24
   0   4   8    3.60    2.70
   0   4  -8    0.70    2.34
  -1  -4  -8   41.15    3.80
   1  -4   8   41.52    2.71
  -1  -4  -8   35.15    3.59
   1  -4   8   35.62    4.59
   1  -4   8   39.00    4.50
   1  -4   8   37.89    5.56
   1  -4   8   37.41    3.45
   1   4   8   45.42    5.28
  -1   4  -8   40.70    4.46
   1   4   8   41.21    3.49
   1   4   8   43.60    4.16
   1   4   8   31.06    4.28
  -1   4  -8   42.37    5.53
   2  -4   8   15.78    1.91
   2  -4   8   19.08    3.50
   2  -4   8   16.29    2.40
   2  -4   8   27.26    5.58
  -2  -4  -8   20.30    2.93
   2  -4   8   15.66    2.68
   2   4   8   18.60    2.86
   2   4   8   25.87    4.74
   2   4   8   10.70    3.79
  -2   4  -8   21.00    3.65
   3  -4   8  147.66   12.51
   3  -4   8  140.59    9.55
  -3  -4  -8  143.23    9.04
   3   4   8  140.86   12.26
   3   4   8  139.86    7.33
   3   4   8  130.12   10.25
  -3   4  -8  150.68    7.43
   4  -4   8   15.87    6.29
  -4  -4  -8   14.48    2.64
  -4  -4  -8    8.17    3.32
  -4  -4  -8   14.75    3.06
   4  -4   8   12.80    3.24
  -4   4  -8   10.60    2.16
   4   4   8   11.26    4.17
   4   4   8    7.85    2.86
   5  -4   8   79.17    6.92
  -5  -4  -8   77.67    5.26
   5   4   8   84.82    8.27
  -5   4  -8   79.56    5.16
   6  -4   8    5.99    3.67
  -6  -4  -8    7.75    3.55
  -6   4  -8    2.55    2.31
   6   4   8   -2.85    5.22
   7  -4   8    5.11    3.97
  -7  -4  -8    0.60    4.69
   7   4   8   -6.01    5.91
  -7   4  -8    3.21    3.37
  -7  -5   8   31.57    6.07
  -7   5   8   26.80    4.54
  -7   5   8   28.30    5.50
  -7   5   8   31.91    6.52
   6  -5  -8   14.38    5.33
  -6  -5   8   30.92    4.98
  -6   5   8   33.50    5.00
  -6   5   8   29.21    5.47
  -6   5   8   29.49    4.50
  -5  -5   8   26.88    4.44
   5  -5  -8   21.05    4.60
  -5   5   8   29.53    5.07
  -5   5   8   28.31    5.52
   4  -5  -8    2.76    3.28
  -4  -5   8   -0.57    2.57
   4  -5  -8   -5.28    3.54
  -4   5   8    0.73    3.01
   4   5  -8    4.61    5.26
  -4   5   8   -3.27    2.87
   3  -5  -8   12.71    6.43
  -3  -5   8   18.17    3.55
   3  -5  -8   15.01    3.04
   3  -5  -8   12.56    3.50
  -3   5   8   23.55    3.94
  -3   5   8   17.35    3.27
   3   5  -8   13.26    4.22
  -2  -5   8   80.65    5.87
   2  -5  -8   76.81    9.19
   2  -5  -8   70.94    6.37
  -2  -5   8   67.43    5.62
   2   5  -8   72.52   10.98
   2   5  -8   59.43    7.25
  -2   5   8   79.23    4.86
  -2   5   8   69.57    6.16
  -2   5   8   73.78    5.11
   1  -5  -8  109.83    7.70
  -1  -5   8   96.82    5.23
   1  -5  -8  107.96    9.99
  -1  -5   8  116.38    7.37
  -1  -5   8   92.05    7.55
   1  -5  -8   96.72    6.99
  -1  -5   8  104.87    7.60
   1   5  -8  112.50    7.74
  -1   5   8  104.29    7.14
   1   5  -8  114.74   10.29
  -1   5   8  108.71    7.83
   0  -5  -8  135.26    8.95
   0  -5  -8  131.42   11.71
   0  -5   8  129.06    6.82
   0  -5   8  142.65    9.40
   0  -5   8  129.55    9.40
   0  -5  -8  114.01    8.79
   0  -5   8  140.88    8.67
   0   5   8  143.05    8.51
   0   5   8  122.32    9.44
   0   5  -8  145.33    8.48
   0   5  -8  141.19   11.41
   0   5  -8  137.88    8.92
   0   5   8  141.50    9.08
  -1  -5  -8  136.36    9.32
   1  -5   8  152.59    7.66
   1  -5   8  151.76    9.55
   1  -5   8  152.47   12.41
   1  -5   8  137.48    9.14
  -1  -5  -8  148.40    9.49
   1  -5   8  153.48    9.97
   1   5   8  122.37    7.25
  -1   5  -8  155.64   12.18
  -1   5  -8  159.83    9.71
   1   5   8  134.15   11.42
   1   5   8  158.06    9.93
   1   5   8  131.17    9.57
   2  -5   8   54.53    6.89
  -2  -5  -8   43.87    4.37
   2  -5   8   41.64    4.29
   2  -5   8   44.35    5.28
   2  -5   8   48.59    4.92
   2  -5   8   39.77    3.66
   2   5   8   44.08    6.11
   2   5   8   41.32    3.51
   2   5   8   41.73    5.57
   3  -5   8   -4.12    2.80
  -3  -5  -8    1.35    1.88
   3  -5   8    6.00    5.16
   3   5   8    3.06    2.25
  -3   5  -8    2.21    1.88
   3   5   8   -1.28    4.19
   3   5   8    2.71    4.72
  -4  -5  -8   12.28    2.49
   4  -5   8   13.88    3.41
   4  -5   8   14.63    7.10
   4   5   8   10.78    6.29
  -4   5  -8   16.14    2.58
   4   5   8   12.22    4.62
   4   5   8   19.05    3.22
  -5  -5  -8   13.62    2.81
   5  -5   8   14.59    3.81
  -5  -5  -8   19.69    3.19
  -5   5  -8   15.34    2.68
   5   5   8   12.42    5.21
  -6  -5  -8   45.43    5.42
   6  -5   8   35.69    5.70
   6   5   8   36.57    6.90
  -6   5  -8   50.48    4.08
  -7  -5  -8   22.14    4.71
   7  -5   8   15.83    5.18
   7   5   8   18.12    7.98
  -7   5  -8   33.40    4.67
  -7  -6   8   -1.75    3.96
   7  -6  -8  -10.70    6.63
  -7   6   8   12.34    4.76
  -7   6   8   -1.65    5.47
   6  -6  -8   31.89    6.09
  -6  -6   8   44.13    5.54
  -6   6   8   46.22    5.79
  -6   6   8   50.51    6.92
  -6   6   8   49.56    7.74
   5  -6  -8    6.59    4.23
  -5  -6   8    8.07    3.14
  -5   6   8   11.77    3.96
  -5   6   8    4.19    3.47
  -5   6   8   11.41    3.63
   4  -6  -8  122.16    8.77
   4  -6  -8  115.13    9.94
  -4  -6   8  135.68    8.91
  -4   6   8  133.18    8.36
  -4   6   8  127.03    7.31
   4   6  -8   99.48   10.70
  -3  -6   8   21.51    4.36
   3  -6  -8   17.49    3.46
   3  -6  -8   17.30    3.31
   3   6  -8    9.00    5.13
  -3   6   8   21.92    3.74
  -3   6   8   21.62    3.49
   2  -6  -8   78.81    6.69
   2  -6  -8   78.81   10.45
  -2  -6   8   72.31    5.62
  -2  -6   8   70.26    5.76
   2   6  -8   94.35   10.36
  -2   6   8   63.15    5.19
  -2   6   8   75.19    6.49
   2   6  -8   73.94    7.22
  -2   6   8   77.80    5.46
  -1  -6   8    3.61    1.22
   1  -6  -8    8.37    4.95
   1  -6  -8    0.03    2.33
  -1  -6   8    1.35    2.93
  -1  -6   8    3.44    2.75
  -1  -6   8    3.39    2.24
   1   6  -8   -0.56    2.76
   1   6  -8    0.98    5.29
  -1   6   8   -0.28    2.15
  -1   6   8   -0.30    3.25
   0  -6  -8   10.87    2.42
   0  -6   8    9.92    1.77
   0  -6  -8   10.51    2.86
   0  -6   8   14.68    3.32
   0  -6  -8   23.18    5.96
   0  -6   8   11.26    2.73
   0  -6   8    8.27    1.73
   0  -6   8   13.97    3.05
   0   6   8    9.45    2.45
   0   6  -8    5.07    2.30
   0   6   8   10.84    2.56
   0   6  -8   12.99    4.70
   0   6  -8   15.24    2.93
   0   6   8   21.35    3.87
   1  -6   8    5.58    2.02
   1  -6   8    8.03    4.89
   1  -6   8    8.69    2.32
   1  -6   8    7.03    3.23
  -1  -6  -8    4.51    2.16
   1  -6   8    5.08    2.94
   1   6   8    5.88    2.13
   1   6   8    0.83    3.35
   1   6   8    2.28    3.88
  -1   6  -8    6.37    2.97
  -1   6  -8    2.66    4.45
   2  -6   8  143.60    8.90
   2  -6   8  135.15   12.97
   2  -6   8  145.00    9.25
   2  -6   8  144.20    9.36
   2  -6   8  139.17    9.53
   2  -6   8  138.83    7.66
  -2  -6  -8  136.67    9.17
   2   6   8  126.71   11.56
   2   6   8  124.95   10.24
   2   6   8  136.92    6.92
  -3  -6  -8   20.38    3.97
   3  -6   8   22.86    4.71
   3  -6   8   18.82    3.03
   3  -6   8   17.58    3.49
   3  -6   8   26.40    6.35
   3   6   8   14.69    5.39
   3   6   8   17.98    5.66
  -3   6  -8   22.03    2.94
   3   6   8   23.23    3.21
   4  -6   8  114.81    8.42
  -4  -6  -8  115.95    8.14
  -4   6  -8  116.12    6.26
   4   6   8  113.88   12.73
   4   6   8   98.29    9.78
   4   6   8  107.79    6.77
  -5  -6  -8    1.05    2.85
  -5  -6  -8    3.57    2.95
   5  -6   8    9.11    3.77
   5   6   8   -9.39    8.38
   5   6   8    1.69    5.35
  -5   6  -8    6.83    2.49
   6  -6   8   20.58    4.78
  -6  -6  -8   17.57    4.01
   6   6   8   20.19    6.72
  -6   6  -8   16.66    2.82
   7   6   8   -5.46    8.28
   7  -7  -8   22.81    7.75
  -7   7   8   35.51    5.84
  -7   7   8   54.27    7.11
  -6  -7   8    4.68    4.15
   6  -7  -8   -4.81    4.49
  -6   7   8    3.92    4.52
  -6   7   8    7.05    4.64
   5  -7  -8   33.49    6.91
  -5  -7   8   38.32    5.71
  -5   7   8   53.39    6.00
  -5   7   8   38.34    5.90
  -5   7   8   37.69    5.41
  -4  -7   8    1.33    3.42
   4  -7  -8   -2.85    3.55
  -4   7   8    1.66    3.37
  -4   7   8    0.56    2.88
   3  -7  -8   10.46    3.11
  -3  -7   8    8.88    2.98
  -3   7   8   15.79    3.28
   3   7  -8    6.02    5.15
  -3   7   8   12.18    3.27
   3   7  -8    8.26    8.69
   2  -7  -8    3.00    3.01
  -2  -7   8    0.09    2.74
   2  -7  -8    3.35    6.29
   2   7  -8    9.57    7.68
  -2   7   8   -0.72    3.44
   2   7  -8    1.39    3.13
  -2   7   8    3.91    2.58
  -2   7   8    5.37    1.90
  -1  -7   8  154.21    7.91
  -1  -7   8  173.88   10.38
   1  -7  -8  170.99   11.01
   1  -7  -8  159.66   15.08
  -1  -7   8  162.22   10.47
   1   7  -8  165.40   10.43
  -1   7   8  177.30    8.81
  -1   7   8  150.92   10.70
  -1   7   8  162.96    9.86
   1   7  -8  153.68   14.41
   0  -7   8   10.48    2.04
   0  -7  -8   14.92    6.57
   0  -7   8    3.47    2.42
   0  -7   8   10.84    3.69
   0  -7  -8    5.19    2.45
   0  -7   8    1.90    3.31
   0   7  -8    9.49    5.49
   0   7   8   10.29    3.85
   0   7  -8    8.47    2.95
   0   7   8    7.95    2.48
  -1  -7  -8  145.57    9.43
   1  -7   8  131.41    7.35
   1  -7   8  127.32    9.95
   1  -7   8  131.97    9.53
   1  -7   8  140.18    8.92
   1  -7   8  132.43   13.38
  -1   7  -8  158.29   13.04
   1   7   8  145.18   11.82
   1   7   8  136.61    6.92
   1   7   8  132.10   10.09
   2  -7   8    1.72    3.08
   2  -7   8   -2.75    2.97
   2  -7   8   -1.79    6.20
   2  -7   8    0.57    2.51
  -2  -7  -8    1.48    2.51
   2   7   8   -2.93    3.97
   2   7   8    0.14    1.75
   2   7   8    0.46    3.08
   2   7   8   -4.00    4.20
   3  -7   8   14.17    3.01
   3  -7   8    9.80    3.52
   3  -7   8   13.29    3.43
  -3  -7  -8   13.92    3.00
   3   7   8   12.51    2.39
  -3   7  -8    9.82    2.61
   3   7   8   11.30    5.11
   3   7   8   20.87    6.22
   4  -7   8   -2.20    3.87
   4  -7   8    3.42    3.45
  -4  -7  -8   -6.42    2.76
   4  -7   8   -0.23    2.85
  -4   7  -8    3.30    2.59
   4   7   8   10.69    7.59
   4   7   8   -0.13    5.38
   5  -7   8   36.05    6.09
  -5  -7  -8   28.38    5.78
  -5   7  -8   31.51    3.65
   5   7   8   35.54    9.37
   6  -7   8    1.74    4.78
   6   7   8   -9.53   11.40
  -6   7  -8    0.98    2.55
   6   7   8  -14.14    6.78
   6  -8  -8    5.49    5.86
  -6  -8   8   32.99    5.57
  -6   8   8   21.57    5.09
  -6   8   8   13.21    5.29
   5  -8  -8   11.84    4.68
  -5  -8   8   10.24    4.13
  -5   8   8   13.79    4.10
  -5   8   8   22.73    3.95
   4  -8  -8   95.88    8.66
  -4  -8   8   94.06    7.60
  -4   8   8   92.27    6.58
  -4   8   8  101.35    6.94
   4   8  -8   88.06   15.38
  -4   8   8  105.74    6.67
   3  -8  -8   33.66    5.88
  -3  -8   8   32.17    5.37
   3   8  -8   48.08   10.43
  -3   8   8   35.26    3.95
  -3   8   8   32.53    4.37
   3   8  -8   35.59    6.05
  -2  -8   8   74.38    5.92
   2  -8  -8   61.06    6.41
  -2   8   8   51.76    4.48
   2   8  -8   57.84    5.28
  -2   8   8   55.25    6.25
  -2   8   8   65.28    5.44
   2   8  -8   75.45   11.72
   1  -8  -8    4.52    2.86
  -1  -8   8    1.94    2.92
  -1  -8   8    5.90    2.81
   1  -8  -8   15.29    7.53
   1   8  -8    6.72    2.43
  -1   8   8    8.11    3.06
  -1   8   8    3.34    2.32
  -1   8   8    7.73    3.70
   1   8  -8    0.02    6.05
   0  -8   8    3.78    2.26
   0  -8   8   -0.38    3.42
   0  -8   8    4.85    2.82
   0  -8  -8   -0.74    2.73
   0  -8  -8    7.28    7.83
   0   8   8    7.81    2.59
   0   8  -8   -3.38    5.49
   0   8   8   -2.50    4.04
   0   8   8    1.02    3.85
   1  -8   8    5.56    2.55
  -1  -8  -8    4.67    2.76
   1  -8   8    2.74    2.82
   1  -8   8    5.86    7.15
   1  -8   8    8.32    3.59
   1   8   8    8.58    3.19
   1   8   8    2.21    4.24
  -1   8  -8    0.78    6.35
   1   8   8    8.91    4.33
   1   8   8    6.80    1.84
   2  -8   8  129.48    8.18
   2  -8   8  114.84    8.85
   2  -8   8  116.91    8.52
  -2  -8  -8  110.14    8.50
   2   8   8  121.74    8.90
   2   8   8  108.34    5.69
   2   8   8   97.80   10.83
   2   8   8  105.21    9.54
   3  -8   8   35.48    6.03
   3  -8   8   33.26    5.14
   3  -8   8   35.64    5.16
  -3  -8  -8   33.59    5.63
   3   8   8   23.30    5.83
   3   8   8   35.78    6.87
   4  -8   8   57.73    6.29
   4  -8   8   55.11    6.35
  -4  -8  -8   56.15    6.39
   4  -8   8   69.44    7.12
   4   8   8   63.16   11.38
  -4   8  -8   64.34    4.97
  -5  -8  -8   19.02    4.35
   5  -8   8   22.79    4.88
   5  -8   8   28.27    5.88
   5   8   8   32.77   10.09
  -5   8  -8   22.32    3.38
   5   8   8   20.97    6.81
   6  -8   8    8.32    5.49
   6   8   8    3.98    7.81
  -6   8  -8    9.83    3.46
   6   8   8   11.48   11.27
   6  -9  -8    7.90    6.25
  -6  -9   8   13.90    4.49
  -6   9   8   14.74    5.55
  -6   9   8   18.27    5.07
  -5  -9   8   12.25    4.42
   5  -9  -8   -0.60    4.02
   5   9  -8   -6.43   11.29
  -5   9   8    6.00    4.73
  -5   9   8    4.74    4.50
  -4  -9   8    1.63    3.99
   4  -9  -8    3.70    3.85
  -4   9   8    1.68    3.17
  -4   9   8    7.35    4.03
   4   9  -8   14.21   10.45
   3  -9  -8    4.54    3.14
  -3  -9   8   12.29    3.83
   3   9  -8    7.88    9.17
  -3   9   8   10.14    3.32
  -3   9   8   11.07    3.01
  -2  -9   8  103.21    7.34
   2  -9  -8   96.73    8.20
  -2   9   8   99.62    6.35
  -2   9   8   86.00    8.06
   2   9  -8  106.58   12.92
   1  -9  -8   26.23    4.81
  -1  -9   8   23.24    4.62
  -1  -9   8   15.82    3.16
  -1   9   8   24.33    3.00
  -1   9   8   20.02    3.25
  -1   9   8   16.77    2.83
   1   9  -8   18.85    7.11
  -1   9   8   13.43    4.30
   0  -9  -8  114.71   15.11
   0  -9   8  139.31    7.54
   0  -9   8  137.23    9.12
   0  -9  -8  138.15    9.64
   0  -9   8  131.41    8.91
   0   9   8  134.75    8.51
   0   9   8  131.46   12.29
   0   9   8  131.06    8.47
   0   9   8  116.69   10.17
   0   9  -8  138.89   13.32
   1  -9   8   25.54    4.67
  -1  -9  -8   26.84    5.13
   1  -9   8   31.21    4.58
   1  -9   8   25.79    4.94
   1   9   8   17.89    4.91
   1   9   8   28.33    7.41
   1   9   8   34.70    5.26
  -1   9  -8   30.59    7.89
   2  -9   8   27.92    5.74
   2  -9   8   30.66    6.49
   2  -9   8   17.89    3.69
  -2  -9  -8   29.06    4.91
   2   9   8   29.48    6.28
   2   9   8   23.89    4.77
   2   9   8   33.36    6.58
   3  -9   8   -0.59    3.89
  -3  -9  -8   -4.85    3.33
   3  -9   8    1.77    3.49
   3  -9   8    2.86    4.02
   3   9   8   -2.47    5.78
   3   9   8   -5.91    6.53
  -4  -9  -8   -0.73    3.63
   4  -9   8   -3.61    3.78
   4  -9   8    0.34    4.14
  -4   9  -8    0.57    3.06
   4   9   8    8.44    8.21
   4   9   8   -0.46    6.22
   5  -9   8    8.18    5.69
  -5  -9  -8    2.79    4.44
   5  -9   8    5.85    4.76
   5   9   8   16.36   10.58
   5   9   8   -1.86    7.17
  -5   9  -8    0.92    2.98
   6  -9   8   61.75   11.04
   6  -9   8   44.27    7.98
  -6   9  -8   61.47    5.23
   6   9   8   37.01    9.73
   6   9   8   55.56   15.10
   6 -10  -8    5.84    6.59
  -6  10   8    3.49    5.88
  -6  10   8   -0.80    5.95
   5 -10  -8   49.50    8.45
  -5 -10   8   38.04    6.73
  -5  10   8   49.11    6.35
   5  10  -8   42.49   12.66
  -5  10   8   45.22    7.05
   4 -10  -8   -0.09    4.05
  -4 -10   8    1.44    3.81
  -4  10   8   12.49    3.94
  -4  10   8    1.93    4.09
   4  10  -8    5.14   11.30
   3 -10  -8  101.00    8.79
  -3 -10   8  109.82    8.63
   3  10  -8  114.53   15.10
  -3  10   8  101.31    6.49
  -3  10   8   93.96    6.66
  -2 -10   8   -2.49    3.69
[truncated: 160,308 more chars]
